# Supplementary material for: Dynamic fragmentation and entrainment characteristics of a heavily Jointed Landslide: DEM simulation, field seismic signal and UAV image analysis
Source: Research Square preprint supplement (doi:10.21203/rs.3.rs-7446987/v1), 2025-10-11
Supplement: Supplementary file 1 [file 0120e3628fe6f564594da7e3.xlsx]

## Sheet: Sheet1
0											65									10								20									30								40
radius	frag_id	ball_id	vel	spin	unbalx	unbaly						radius	frag_id	ball_id	vel	spin	unbalx	unbaly		radius	frag_id	ball_id	vel	spin	unbalx	unbaly			radius	frag_id	ball_id	vel	spin	unbalx	unbaly		radius	frag_id	ball_id	vel	spin	unbalx	unbaly		radius	frag_id	ball_id	vel	spin
0.326126	0	13	0.0394511	0.0122352	-3365.58	2186.33						0.326126	0	13	0.00917913	0.0298405	-235.436	-1216.04		0.326126	0	13	0.00201769	2.10135e-05	-130.088	-118.901			0.326126	0	13	0.00191104	-0.000186134	-682.388	-440.703		0.326126	0	13	0.00506668	0.000203275	-796.58	220.62		0.326126	0	13	0.00410706	8.10993e-05
0.484752	0	17	0.0557609	0.000362942	758.888	-1151.81						0.484752	0	17	0.0477952	0.0272995	-3474.45	-64007.2		0.484752	0	17	0.00120372	0.000160507	935.52	441.151			0.484752	0	17	0.00569501	4.63751e-05	-2.85936	597.226		0.484752	0	17	0.014766	0.000297962	612.315	-3000.02		0.484752	0	17	0.0148804	0.00108993
0.460076	0	24	0.0221133	0.00194714	1495.65	-672.116						0.460076	0	24	1.16188	0.547971	-619470	365976		0.460076	0	24	0.000694756	3.80954e-06	241.6	17.3222			0.460076	0	24	0.00379644	0.000116931	1316.91	-313.769		0.460076	0	24	0.0120506	-0.00293184	-957.572	339.522		0.460076	0	24	0.0223696	0.00368086
0.461865	0	36	0.0281083	0.000443811	881.332	753.796						0.461865	0	36	0.0146018	-0.000640869	2842.27	1133.32		0.461865	0	36	0.000859171	-2.82427e-05	-91.412	-249.288			0.461865	0	36	0.00273341	0.000127578	-450.142	-706.805		0.461865	0	36	0.00777318	0.000367762	-384.493	540.739		0.461865	0	36	0.00277076	5.72313e-05
0.419694	0	54	0.095253	0.00543686	-1254.48	-8976.58						0.419694	0	54	0.573408	-0.253728	-56106.7	-205803		0.419694	0	54	0.00401873	0.000114814	24.5575	-529.614			0.419694	0	54	0.00312121	0.00015302	556.744	140.473		0.419694	0	54	0.00651937	0.00085786	-2772.21	-1486.03		0.419694	0	54	0.0197952	0.00115918
0.427904	0	56	0.0993525	0.000410323	-181.43	1227.1						0.427904	0	56	0.87925	0.827653	-161304	-3130.82		0.427904	0	56	0.00159319	-0.000300255	-57.0747	529.53			0.427904	0	56	0.00537681	-0.000884629	96.2067	376.491		0.427904	0	56	0.0165569	-0.000197803	-571.877	-3334.38		0.427904	0	56	0.0187575	-0.000328217
0.305974	0	68	0.13164	-0.0108952	-1473.93	-724.444						0.305974	0	68	2.77676	-0.122559	-79769.1	-419871		0.305974	0	68	0.00151708	0.000203752	-36.7698	188.956			0.305974	0	68	0.00645464	-0.00113039	588.707	599.058		0.305974	0	68	0.0211404	0.00517835	414.543	-2839.29		0.305974	0	68	0.0257266	-0.000407599
0.473078	0	69	0.079547	0.00044903	-200.278	573.801						0.473078	0	69	1.32644	-0.134346	16886.3	-159548		0.473078	0	69	0.00390526	-6.24507e-05	-94.8721	86.2908			0.473078	0	69	0.00479448	0.000432564	-1341.16	294.572		0.473078	0	69	0.0110501	0.00045195	2219.49	-259.88		0.473078	0	69	0.00349076	-0.00176581
0.497573	0	70	0.107334	-0.000238628	-686.784	-16.646						0.497573	0	70	0.063058	0.00383274	-78719	-111051		0.497573	0	70	0.00100596	-0.000133123	173.658	-128.334			0.497573	0	70	0.00306787	0.000291377	-939.687	-1711.22		0.497573	0	70	0.00453006	-0.000219394	-1278.54	-2150		0.497573	0	70	0.00294407	-0.000734532
0.450093	0	89	0.0225371	-0.0115994	-2048.18	13254.5						0.450093	0	89	0.0283105	-0.00116903	-10896.5	11828.4		0.450093	0	89	0.00244075	0.000123754	-192.983	-306.3			0.450093	0	89	0.00254675	0.000588483	449.011	-470.976		0.450093	0	89	0.00784258	-0.00218519	1401.06	1136.32		0.450093	0	89	0.00270424	0.000173626
0.382222	0	94	0.0336418	-1.52459e-05	-349.591	1452.32						0.382222	0	94	0.0655641	0.0352768	4182.26	-25061.5		0.382222	0	94	0.000891304	0.000673178	-3.42025	-11.3711			0.382222	0	94	0.0021768	0.000134476	101.704	-172.756		0.382222	0	94	0.00190204	6.23636e-05	195.646	900.934		0.382222	0	94	0.00334698	0.00137751
0.357675	0	97	0.0179928	0.000863732	-275.194	-4047.7						0.357675	0	97	3.99876	-0.0272721	66450.4	-100993		0.357675	0	97	0.00396093	-0.000165687	-549.429	369.277			0.357675	0	97	0.0068152	0.00103662	98.4895	-1388.41		0.357675	0	97	0.0208808	-0.0136618	-2010.29	-21933.8		0.357675	0	97	0.0608904	-0.00646737
0.324006	0	107	0.062587	0.00256561	-111.99	1221.8						0.324006	0	107	0.17194	0.0354137	61.9745	10656.4		0.324006	0	107	0.00220792	-0.0006695	-180.529	-1120.55			0.324006	0	107	0.00365987	-0.00144285	-67.3565	840.474		0.324006	0	107	0.00339451	0.00268168	567.759	70.2524		0.324006	0	107	0.00469783	-0.00274793
0.434622	0	110	0.103536	0.00314159	344.118	-3612.26						0.434622	0	110	1.73007	0.0133602	-18820.8	69078.5		0.434622	0	110	0.00115387	0.000652544	-501.028	-158.776			0.434622	0	110	0.00633167	-0.00110379	101.757	209.207		0.434622	0	110	0.0119661	0.00205205	229.608	872.009		0.434622	0	110	0.0157775	-0.00140307
0.430279	0	113	0.0708592	0.00693151	2088.04	-8710.17						0.430279	0	113	0.538746	-0.12092	-95331.1	-183955		0.430279	0	113	0.00056826	0.000158328	-47.9846	-591.764			0.430279	0	113	0.00372935	0.000327489	146.279	-509.547		0.430279	0	113	0.0200529	-8.53994e-05	897.767	-321.412		0.430279	0	113	0.00776095	0.00233713
0.484017	0	123	0.00163376	-0.000248612	-218.95	785.044						0.484017	0	123	1.98769	-0.125487	-196996	390516		0.484017	0	123	0.0012795	-0.000150311	-416.85	243.781			0.484017	0	123	0.020256	0.00630798	-10159.6	4788.72		0.484017	0	123	0.0232782	0.012026	24094.8	-56645.8		0.484017	0	123	0.00460723	-0.000614049
0.344497	0	129	0.0493685	-0.00106857	-448.777	-99.7348						0.344497	0	129	0.0224235	-0.0190131	18862.4	-15455.2		0.344497	0	129	0.000769686	-1.63239e-05	-38.577	-68.4006			0.344497	0	129	0.000913016	0.000139709	336.771	40.4018		0.344497	0	129	0.00604978	-0.000193395	1015.73	-1156.78		0.344497	0	129	0.00817706	0.00133431
0.436095	0	135	0.0267949	-0.0070105	-844.092	1184.55						0.436095	0	135	0.125045	-0.0404213	4026.8	-45996.6		0.436095	0	135	0.00066906	-0.000130188	-109.239	-107.184			0.436095	0	135	0.00200272	0.000390897	1454.85	-823.552		0.436095	0	135	0.00145738	-0.000307947	-1212.25	548.649		0.436095	0	135	0.000840844	-0.00137282
0.488947	0	138	0.0130684	0.000997267	-586.69	3205.67						0.488947	0	138	0.0197158	0.0013199	1437.07	-473.7		0.488947	0	138	0.00188821	7.69919e-06	82.3143	248.489			0.488947	0	138	0.00203386	0.000155214	-804.936	-628.451		0.488947	0	138	0.00389352	-0.000152661	-1642.06	112.658		0.488947	0	138	0.00455984	0.000209534
0.333381	0	140	0.000896879	0.00107158	55.3348	69.3532						0.333381	0	140	4.04192	-1.12976	92672.7	-99645.9		0.333381	0	140	0.00023326	-8.11373e-05	21.6203	30.4403			0.333381	0	140	0.00379809	-0.00094139	1184.1	-893.159		0.333381	0	140	0.0115965	-0.00520917	-18431.7	11493.4		0.333381	0	140	0.0120346	-0.011403
0.4738	0	144	0.0453307	-0.000417577	1539.42	-930.609						0.4738	0	144	0.110464	0.0124604	28943.3	-1501.77		0.4738	0	144	0.0016428	0.000226734	89.0837	-627.458			0.4738	0	144	0.00456872	-0.000283624	-41.5363	-832.426		0.4738	0	144	0.0102645	0.000399342	-3525.53	-3182.97		0.4738	0	144	0.00934462	0.00878746
0.447145	0	148	0.0431088	0.0280528	-254.328	-10050.8						0.447145	0	148	0.0643318	-0.0203814	17170.1	-7503.76		0.447145	0	148	0.00052866	7.67459e-05	421.944	-191.82			0.447145	0	148	0.00215176	0.00057318	105.634	-520.957		0.447145	0	148	0.00714069	-8.76541e-05	248.729	-798.719		0.447145	0	148	0.0136704	-0.00126919
0.460162	0	149	0.0182907	0.00283264	-10.2704	5227.84						0.460162	0	149	0.0189004	-0.000718614	3397.58	929.294		0.460162	0	149	0.0020985	-1.54685e-05	-49.7167	95.6948			0.460162	0	149	0.00254462	8.50148e-05	-748.874	-394.503		0.460162	0	149	0.00278877	1.51295e-05	-1838.25	-71.7299		0.460162	0	149	0.00424419	-9.55183e-05
0.38411	0	151	0.0759338	-0.00203358	-708.456	-129.069						0.38411	0	151	0.135226	-0.0276236	77231.4	-78269.3		0.38411	0	151	7.40193e-05	0.000123887	330.797	-207.193			0.38411	0	151	0.000789431	-0.00042337	-138.642	128.64		0.38411	0	151	0.0149362	0.0016069	-1027.22	4096.86		0.38411	0	151	0.00445328	0.000292143
0.428675	0	164	0.0226283	-5.6942e-05	3086.13	5181.81						0.428675	0	164	0.00592117	0.00672113	-1776.76	4341.71		0.428675	0	164	0.000246253	-6.96357e-06	54.2098	19.9183			0.428675	0	164	0.000961376	-0.000231016	48.4442	132.037		0.428675	0	164	0.0033479	0.000401695	471.374	-962.614		0.428675	0	164	0.00262209	-0.000554244
0.399452	0	183	0.0330338	-0.00174276	1292.96	1394.14						0.399452	0	183	3.00625	0.62855	-79830.3	283300		0.399452	0	183	0.00319601	0.000311596	-118.233	-182.931			0.399452	0	183	0.0427278	0.00145381	-2743.19	-3416.79		0.399452	0	183	1.29874	1.91179	-31400.1	93049.7		0.399452	0	183	0.669581	1.10399
0.307814	0	189	0.031277	0.00132203	-722.452	760.161						0.307814	0	189	0.00802743	0.00211956	3638.81	12.8927		0.307814	0	189	0.00117495	-0.000106817	48.7966	57.6435			0.307814	0	189	0.00261364	-0.000342847	-23.2468	-275.85		0.307814	0	189	0.00655618	0.000443996	-443.368	162.214		0.307814	0	189	0.00540935	0.000178972
0.365272	0	198	0.118501	0.0017132	-123.173	-7138.77						0.365272	0	198	3.2578	-1.05533	54165.2	-21282.4		0.365272	0	198	0.000969769	-0.000202546	-37.2266	5.68852			0.365272	0	198	0.00468154	-0.000495298	-68.0302	1201.15		0.365272	0	198	0.00749168	-0.00644691	1344.14	-2266.23		0.365272	0	198	0.031902	6.96877e-05
0.354672	0	201	0.114869	-0.00451681	-260.943	-1559.18						0.354672	0	201	1.03201	-0.705505	230496	-13889.6		0.354672	0	201	0.000393209	6.96548e-05	121.174	-70.8787			0.354672	0	201	0.00439442	-0.000742421	441.895	-75.7787		0.354672	0	201	0.021845	-0.00180886	-723.03	-990.498		0.354672	0	201	0.0166725	-0.00192639
0.488763	0	211	0.0386126	-0.00193608	29.6922	8089.24						0.488763	0	211	0.0237108	-0.00859108	37587.5	-23743.6		0.488763	0	211	0.000786939	-7.11776e-05	-175.677	24.3949			0.488763	0	211	0.00208259	0.000138198	550.998	330.313		0.488763	0	211	0.00757687	0.000653624	-733.725	67.1502		0.488763	0	211	0.00309618	-0.000255581
0.331024	0	221	0.0257424	-0.0238012	-18.9857	840.292						0.331024	0	221	0.00967483	-0.0190673	-4361.65	-529.307		0.331024	0	221	4.23109e-05	3.12378e-05	11.1565	0.735134			0.331024	0	221	0.000232583	-0.000371122	32.0849	2.67308		0.331024	0	221	9.6437e-05	-0.000213442	-22.4547	7.28324		0.331024	0	221	0.000217154	0.00056711
0.471463	0	231	0.0393936	0.00834923	-1140.94	-3881.32						0.471463	0	231	0.0315865	-0.0409197	-95036.5	58879.6		0.471463	0	231	0.000765377	2.47621e-05	-212.235	-430.758			0.471463	0	231	0.00182465	0.000163101	-412.605	-134.686		0.471463	0	231	0.00395399	-0.000463196	-786.181	-851.918		0.471463	0	231	0.00350745	-0.0187279
0.354521	0	237	0.0257421	0.000494118	-521.6	2421.22						0.354521	0	237	0.0527297	-0.00577082	24277.4	17783.5		0.354521	0	237	0.000643471	1.4201e-05	-94.2535	28.5165			0.354521	0	237	0.000746327	5.17406e-05	149.041	215.748		0.354521	0	237	0.00135903	0.000605402	-209.337	111.804		0.354521	0	237	0.00215304	0.000183691
0.362775	0	246	0.0873701	0.000753887	769.26	1392.83						0.362775	0	246	0.973657	-1.46785	-292244	-195875		0.362775	0	246	0.0020432	-8.38523e-05	-74.8858	157.522			0.362775	0	246	0.00405655	-0.000519857	126.483	53.8413		0.362775	0	246	0.0142278	0.000943221	-1114.74	-1945.04		0.362775	0	246	0.0162479	-1.05677e-05
0.351108	0	249	0.0302868	0.00274528	-247.645	3351.63						0.351108	0	249	0.00590878	-0.00168643	-5602.03	-4203.11		0.351108	0	249	0.000960065	0.00151566	-308.942	51.6306			0.351108	0	249	0.00334075	0.000885338	-37.4147	72.0706		0.351108	0	249	0.0111351	-0.0028955	1653.11	-1230.43		0.351108	0	249	0.00587863	0.000220329
0.439864	0	254	0.0997534	0.00660156	638.045	-1767.88						0.439864	0	254	0.903912	0.566663	155156	-106180		0.439864	0	254	0.00227311	0.000179263	-528.318	262.847			0.439864	0	254	0.0121494	0.000601198	-300.468	1089.2		0.439864	0	254	0.0104939	0.00230916	-2728.69	-4661.52		0.439864	0	254	0.0153119	-0.00322192
0.350818	0	284	0.0940954	-0.0007092	-483.561	2065.13						0.350818	0	284	1.65092	1.19956	-261539	573273		0.350818	0	284	0.00160438	0.00010117	-61.4609	-66.2315			0.350818	0	284	0.0050022	-0.00094102	79.6783	717.098		0.350818	0	284	0.00856537	0.0018037	-1604.52	-2652.52		0.350818	0	284	0.013029	0.00120424
0.440914	0	286	0.0124242	-0.00060101	624.045	7752.12						0.440914	0	286	0.0448905	-0.0323397	29856.5	16988.8		0.440914	0	286	0.00139541	4.73731e-05	-53.2888	36.0495			0.440914	0	286	0.000356777	-9.95777e-05	299.426	489.967		0.440914	0	286	0.00894771	-0.000286764	1903.69	414.682		0.440914	0	286	0.00315207	-0.000138866
0.424324	0	310	0.0926022	-0.000523467	-277.112	971.83						0.424324	0	310	1.59574	-0.306547	0	-10265.6		0.424324	0	310	0.00243555	0.00016863	94.6333	-51.3199			0.424324	0	310	0.00387027	4.14727e-07	-460.187	-451.903		0.424324	0	310	0.0170079	0.00566212	9445.47	3243.49		0.424324	0	310	0.0122421	-0.000372645
0.368119	0	313	0.0307832	0.000372828	1168.47	-987.873						0.368119	0	313	0.0698355	0.000537336	-10737.4	-2730.69		0.368119	0	313	0.00061247	0.000102442	48.3291	-16.684			0.368119	0	313	0.00185619	-0.000111951	-102.615	225		0.368119	0	313	0.00261109	-0.000415321	868.1	-456.409		0.368119	0	313	0.00495838	9.40725e-05
0.356218	0	316	0.0155245	0.00119431	948.686	-740.49						0.356218	0	316	1.32413	-1.80115	330386	-430195		0.356218	0	316	0.00277027	-0.000343185	118.353	642.094			0.356218	0	316	0.0787606	-0.0638873	-15854.3	55044.9		0.356218	0	316	0.0342002	0.033669	-9787.01	-58155.2		0.356218	0	316	0.0390713	-0.00566429
0.404771	0	327	0.0227523	-0.00286437	1182.13	3686.23						0.404771	0	327	1.63141	-0.343457	203550	989463		0.404771	0	327	0.00478707	0.000123744	-278.238	-378.478			0.404771	0	327	0.0185672	-0.00200918	-7051.18	-3020.46		0.404771	0	327	0.44107	-0.201256	-0.32684	-9341.25		0.404771	0	327	0.325285	1.43902
0.301734	0	336	0.0108777	0.00200831	-1158.12	2109.35						0.301734	0	336	0.000642702	0.001406	1570.37	-4.25461		0.301734	0	336	0.00135655	-7.36718e-06	-33.1419	4.42974			0.301734	0	336	0.00187145	6.58765e-06	-313.178	-85.6391		0.301734	0	336	0.00144074	2.5877e-05	-552.91	30.703		0.301734	0	336	0.00293541	0.000197057
0.483914	0	339	0.010676	-0.000372846	-1052.49	-59.1889						0.483914	0	339	0.00494737	0.000280876	-4557.94	-102.617		0.483914	0	339	0.000298694	-6.60491e-06	14.6156	37.5406			0.483914	0	339	0.00160209	0.000161916	105.537	194.666		0.483914	0	339	0.00266027	0.000334436	200.102	516.73		0.483914	0	339	0.000837242	-0.000122494
0.426621	0	348	0.0230775	-0.00168714	-1999.06	-5053.79						0.426621	0	348	4.08421	-3.11248	0	-10377.1		0.426621	0	348	0.00372773	0.000205147	-1193.77	303.5			0.426621	0	348	0.00290782	0.000850025	1556.21	-1928.64		0.426621	0	348	0.0175032	0.0058665	-12078.8	-2623.36		0.426621	0	348	0.0348337	0.0662197
0.313336	0	350	0.101572	-0.000784286	-472.134	-2326.19						0.313336	0	350	1.08273	1.18141	-110726	-52159.1		0.313336	0	350	0.00365454	-0.000103195	-74.0221	62.0476			0.313336	0	350	0.00230291	-0.00234726	-651.103	303.508		0.313336	0	350	0.00873558	-0.0029695	-887.067	-3259.58		0.313336	0	350	0.0218073	-0.00263869
0.427785	0	359	0.125816	0.00100722	-35.393	-6529.72						0.427785	0	359	0.468612	-2.72307	-96604.8	13584		0.427785	0	359	0.000931716	0.000112273	-71.1458	274.875			0.427785	0	359	0.00595409	3.68402e-05	-394.579	-62.1471		0.427785	0	359	0.00501681	0.000191321	-1110.89	-489.087		0.427785	0	359	0.019669	-0.00223123
0.490543	0	362	0.0261651	-0.000726909	1180.94	-1538.7						0.490543	0	362	0.9949	-0.549679	-248284	161852		0.490543	0	362	0.000589375	-0.000157771	635.255	51.2827			0.490543	0	362	0.00185949	-2.56921e-05	1834.2	233.785		0.490543	0	362	0.00638495	-0.00166041	-936.711	6783.5		0.490543	0	362	0.0177704	0.00514924
0.494964	0	373	0.073783	-3.05507e-05	604.395	-1761.13						0.494964	0	373	0.128708	0.124489	-101366	-73002.6		0.494964	0	373	0.00173889	-0.000595589	41.498	1169.25			0.494964	0	373	0.00723295	-0.000247168	241.116	438.905		0.494964	0	373	0.0164731	0.000162133	3298.77	-3192.73		0.494964	0	373	0.0146926	-0.000118931
0.493585	0	376	0.0241033	-0.000250989	-351.312	402.821						0.493585	0	376	0.0831664	-0.0326126	-45802.3	-21605.3		0.493585	0	376	0.00122888	-5.54596e-06	122.287	127.172			0.493585	0	376	0.00216279	-0.000141969	-48.0402	-609.511		0.493585	0	376	0.00579574	-5.51427e-05	491.144	-68.1569		0.493585	0	376	0.00462517	0.000309521
0.352616	0	383	0.0937911	-0.000798034	-1426.49	-1291.58						0.352616	0	383	0.747368	-0.444645	-138776	-219422		0.352616	0	383	0.00155044	5.74819e-05	227.48	-151.912			0.352616	0	383	0.00324721	0.000735762	5.36346	-281.852		0.352616	0	383	0.00781564	-0.000966176	-1595.4	1789.72		0.352616	0	383	0.010138	-0.000673419
0.414056	0	384	0.0681375	-0.00215866	1061.67	4951.51						0.414056	0	384	1.67557	-0.0721226	155927	-553206		0.414056	0	384	0.000861188	-9.38675e-05	452.243	-223.319			0.414056	0	384	0.00961443	-0.000548831	-675.689	571.337		0.414056	0	384	0.00776902	0.000350368	-4465.56	4064.67		0.414056	0	384	0.0153476	-0.00160318
0.489118	0	409	0.0108151	-0.00154123	2499.84	1914.73						0.489118	0	409	0.285383	-0.586045	-0.0260444	-13640.2		0.489118	0	409	0.000387746	7.37491e-05	-30.4571	-98.3588			0.489118	0	409	0.00130883	2.15944e-05	698.645	-25.8222		0.489118	0	409	0.00585124	0.00302011	1413.81	-4362.11		0.489118	0	409	0.0232376	0.00345332
0.330389	0	423	0.0873494	-0.0017724	298.506	1518.97						0.330389	0	423	0.130386	-0.723829	28678.4	-53844.8		0.330389	0	423	0.00153255	1.33749e-05	-27.4176	73.5686			0.330389	0	423	0.00809689	-0.000183758	-252.685	280.227		0.330389	0	423	0.00707909	0.00040022	-565.554	-1191.76		0.330389	0	423	0.0150319	0.000203104
0.320718	0	426	0.113223	-0.00278029	-2691.34	-3399.04						0.320718	0	426	3.33515	-3.0565	-18353.5	-71993		0.320718	0	426	0.0023613	0.000393155	25.6917	-78.5309			0.320718	0	426	0.0139259	0.00022968	291.381	343.307		0.320718	0	426	0.0195042	0.00178426	789.929	-428.546		0.320718	0	426	0.0175936	0.00267618
0.31435	0	428	0.0406501	0.00154317	95.6669	-605.342						0.31435	0	428	0.0440637	0.044412	13758.9	-12700.1		0.31435	0	428	0.000486287	1.94614e-06	-20.6699	-53.273			0.31435	0	428	0.00235589	-6.71456e-05	-581.19	263.551		0.31435	0	428	0.0105876	-4.8985e-05	696.837	-1297.74		0.31435	0	428	0.00734775	-0.00023461
0.37155	0	431	0.045998	0.00181323	-773.9	6912.44						0.37155	0	431	1.63965	-4.17592	0	-7870.92		0.37155	0	431	0.000961029	-0.00213232	61.2585	1184.56			0.37155	0	431	0.00516987	0.00146863	1.50429	-373.835		0.37155	0	431	0.00612766	4.6894e-05	-216.359	-933.468		0.37155	0	431	0.0122923	0.000135314
0.385101	0	443	0.0101102	0.000756018	924.28	-1183.35						0.385101	0	443	1.20826	5.08668	0	-8455.51		0.385101	0	443	0.000900102	-0.000164289	57.4573	-56.0207			0.385101	0	443	0.00138689	-0.000280986	615.755	504.612		0.385101	0	443	0.0108359	0.000541558	2296.74	-2159.7		0.385101	0	443	0.00188543	0.00242093
0.399677	0	449	0.00994494	0.000596362	-594.884	4134.36						0.399677	0	449	0.0299466	0.00704635	-19513.5	2308.66		0.399677	0	449	0.00115075	-5.4428e-05	67.1438	-57.6712			0.399677	0	449	0.00131696	3.12352e-05	-158.094	-47.2519		0.399677	0	449	0.00287631	0.000207669	10.0718	395.482		0.399677	0	449	0.00369233	0.000108886
0.446734	0	452	0.0940235	-0.000764284	935.52	4558.29						0.446734	0	452	0.735999	-1.24514	37669.5	53431.1		0.446734	0	452	0.000807723	0.000143204	-202.55	-177.105			0.446734	0	452	0.00819017	-0.000452504	107.372	1071		0.446734	0	452	0.0044734	0.000470578	-469.812	-2123.83		0.446734	0	452	0.0147726	-0.000932913
0.497959	0	465	0.106138	-0.00121934	240.919	-3723.64						0.497959	0	465	1.39955	0.770787	-76187.1	50747.9		0.497959	0	465	0.00267958	3.76109e-05	388.442	348.816			0.497959	0	465	0.0112867	-0.000474148	178.618	604.605		0.497959	0	465	0.0230808	-0.000980911	-371.208	169.072		0.497959	0	465	0.00374139	-0.0005229
0.430626	0	483	0.0181505	0.00254077	-2262.35	8299.75						0.430626	0	483	0.0183487	0.0155875	2040.65	-19640.9		0.430626	0	483	0.000364849	-0.000357598	78.0506	-106.79			0.430626	0	483	0.00316257	0.000213061	851.375	-212.227		0.430626	0	483	0.00916943	0.000186271	-1419.74	-68.7403		0.430626	0	483	0.00471493	0.000330112
0.358078	0	488	0.0366033	-0.000185609	-356.593	-943.922						0.358078	0	488	0.00667032	-0.000267923	-1913.1	-1467.12		0.358078	0	488	0.000250443	-0.000126634	64.5611	12.7505			0.358078	0	488	0.00369206	-0.000256835	-1.76533	76.7644		0.358078	0	488	0.00772799	0.000394749	-489.344	405.186		0.358078	0	488	0.00366941	-0.000792581
0.46011	0	499	0.0263799	0.000119323	1844.76	1670.34						0.46011	0	499	0.0463158	0.0110381	78482.6	19944.3		0.46011	0	499	0.000489638	-9.66199e-06	-16.1118	59.7328			0.46011	0	499	0.0025027	-8.24782e-05	-216.647	221.89		0.46011	0	499	0.00358573	-6.95408e-05	788.72	644.882		0.46011	0	499	0.00379699	-0.000683654
0.369819	0	524	0.0492682	0.00139733	-163.657	5524.29						0.369819	0	524	0.0641496	0.00604843	-1232.37	55049		0.369819	0	524	0.000131696	-2.61251e-05	-19.7155	27.1277			0.369819	0	524	0.00405812	-0.000184933	111.342	-42.0053		0.369819	0	524	0.00387907	6.24249e-05	732.176	-153.563		0.369819	0	524	0.0140145	-2.73283e-05
0.426747	0	525	0.0366183	0.00523152	482.985	-5836.47						0.426747	0	525	0.0726877	-0.0864902	42891.1	10470.4		0.426747	0	525	0.00274137	0.000372962	70.3823	-359.639			0.426747	0	525	0.00530631	5.1037e-05	599.014	414.501		0.426747	0	525	0.00986206	-0.0022232	818.497	-1066.54		0.426747	0	525	0.0129455	-0.00118007
0.474534	0	535	0.008851	0.00361661	-93.8801	-248.53						0.474534	0	535	0.0138694	0.00650553	6310.82	-28622.5		0.474534	0	535	3.6971e-05	-1.10102e-05	7.48522	20.9329			0.474534	0	535	0.000644018	-6.746e-05	-87.9218	46.7464		0.474534	0	535	0.00085835	-6.79453e-06	294.134	122.429		0.474534	0	535	0.000816118	0.000169285
0.480664	0	539	0.0702245	-0.000833541	-1161.59	1588.33						0.480664	0	539	0.534853	-1.15151	-328419	-46978.6		0.480664	0	539	0.00120014	-0.000204997	190.267	263.746			0.480664	0	539	0.0034561	0.000245755	-482.028	-1010.98		0.480664	0	539	0.0159911	-0.000279552	4268.95	-2882.91		0.480664	0	539	0.0108163	0.000329318
0.389552	0	540	0.0220623	0.000387989	1420.81	-3600.95						0.389552	0	540	3.32198	-3.09045	34996.2	-142557		0.389552	0	540	0.00190629	-9.57772e-05	560.166	-383.482			0.389552	0	540	0.0198941	-0.00258401	4576.78	3450.41		0.389552	0	540	0.0521692	-0.268004	17163.5	-119120		0.389552	0	540	0.481336	0.0358371
0.492744	0	557	0.0425785	-0.00324373	-670.644	10102						0.492744	0	557	0.131869	-0.0769043	-57514.7	112365		0.492744	0	557	0.00111115	-7.03033e-06	78.7597	35.844			0.492744	0	557	0.00532213	0.000235198	935.491	-30.5508		0.492744	0	557	0.00740331	-0.000414826	1356.71	-256.468		0.492744	0	557	0.00454594	-0.00098281
0.337404	0	564	0.0242023	-8.55881e-05	-207.187	-91.8039						0.337404	0	564	1.4091	-1.90237	-224258	27158.3		0.337404	0	564	0.00458075	-0.00150259	667.858	1014.06			0.337404	0	564	1.52031	4.7683	-231687	53384.6		0.337404	0	564	4.35527	-2.4704	0	-6490.68		0.337404	0	564	2.70282	1.35083
0.384545	0	567	0.0930795	-0.000547226	-1244.96	178.292						0.384545	0	567	0.914643	0.213836	120366	171370		0.384545	0	567	0.00209579	-2.19142e-05	-296.382	329.479			0.384545	0	567	0.0105245	-0.000336047	605.717	-451.394		0.384545	0	567	0.00290502	-0.00167987	-1325.39	651.647		0.384545	0	567	0.00901086	-0.00244787
0.370993	0	585	0.0359641	0.00294688	-171.023	-4670.22						0.370993	0	585	0.0377878	-0.0176915	45076.2	13639.4		0.370993	0	585	0.000588692	1.32091e-05	118.668	-182.546			0.370993	0	585	0.00235181	3.25191e-05	145.98	344.871		0.370993	0	585	0.0016815	-0.000276888	1358.52	719.814		0.370993	0	585	0.0100125	0.00325654
0.31913	0	587	0.0745083	-0.00145174	-691.779	-5307.25						0.31913	0	587	0.0420401	-0.196687	-7737.48	41074.2		0.31913	0	587	0.00286271	0.000100622	-314.597	44.9339			0.31913	0	587	0.0059369	0.00099003	-65.3494	-65.9067		0.31913	0	587	0.020984	0.00939795	-7074.41	-6186.44		0.31913	0	587	0.0190277	-0.0030219
0.445226	0	599	0.041903	0.000922094	128.205	-658.374						0.445226	0	599	0.0801431	-0.000127009	-88963.9	-59215.7		0.445226	0	599	0.000935163	4.71241e-07	98.5118	-154.322			0.445226	0	599	0.00182749	0.000131756	514.769	-80.8034		0.445226	0	599	0.00318212	0.00182179	-289.11	1400.65		0.445226	0	599	0.00298985	0.000104574
0.306344	0	600	0.114631	-0.000921679	730.146	941.401						0.306344	0	600	0.796156	-4.21678	0	-5350.68		0.306344	0	600	0.00170306	0.00035618	-286.647	100.609			0.306344	0	600	0.0115439	-0.00208924	1887.45	1123.49		0.306344	0	600	0.00331225	-7.33693e-05	-259.685	2595.55		0.306344	0	600	0.0230373	0.000406913
0.486936	0	607	0.00229642	0.000224268	-357.67	-260.188						0.486936	0	607	0.00710787	0.00169184	577.337	1004.08		0.486936	0	607	0.000499853	-6.92799e-05	83.3268	145.324			0.486936	0	607	0.000676764	0.000175821	-199.398	-125.063		0.486936	0	607	0.00232792	-0.000574468	-528.75	64.5768		0.486936	0	607	0.0014935	0.000384462
0.425974	0	610	0.044014	-0.00232924	-366.811	832.255						0.425974	0	610	2.06792	-0.274094	-13444.3	31864.1		0.425974	0	610	0.0013303	-0.000172283	324.556	122.136			0.425974	0	610	0.00584318	-0.000454295	-319.575	-1358.84		0.425974	0	610	0.00955452	-0.00720299	3120.75	5930.2		0.425974	0	610	0.296557	-0.484136
0.438538	0	611	0.083803	-0.000460448	-684.579	-901.267						0.438538	0	611	0.169197	-0.038279	-53635.2	-120670		0.438538	0	611	0.000972889	0.000181719	391.785	-254.193			0.438538	0	611	0.000963085	-0.000520346	-157.499	-78.2928		0.438538	0	611	0.0172036	0.000602317	-5020.4	3304.65		0.438538	0	611	0.00546776	-0.000338052
0.442885	0	613	0.055929	-0.000281326	411.767	-784.313						0.442885	0	613	0.0853032	0.0138359	23455.6	31003.9		0.442885	0	613	0.00216625	0.000377483	-526.478	444.258			0.442885	0	613	0.00304542	0.000414113	913.65	-1114.51		0.442885	0	613	0.0076387	-0.000567071	1554.36	-959.832		0.442885	0	613	0.00268394	-0.00174234
0.406256	0	626	0.056201	0.000459696	756.84	646.923						0.406256	0	626	0.0722548	-0.0101278	-53001.6	7897.67		0.406256	0	626	0.00147661	8.47121e-05	-29.3581	-175.035			0.406256	0	626	0.00469667	-0.000307593	190.727	110.97		0.406256	0	626	0.00638406	-0.000419228	-969.151	-1787.12		0.406256	0	626	0.00953338	0.000436562
0.39477	0	633	0.0769167	-2.11807e-05	116.187	-4383.2						0.39477	0	633	0.10574	0.0978464	39965.9	29859.5		0.39477	0	633	0.0027227	-0.000100179	61.3775	-195.524			0.39477	0	633	0.00644826	9.62449e-05	-117.57	-820.985		0.39477	0	633	0.0110079	0.000791084	2018.13	-2940.83		0.39477	0	633	0.0118312	-0.00440248
0.303918	0	634	0.0267946	-3.47849e-05	-127.159	15.7147						0.303918	0	634	1.84955	1.75041	0	-5266.27		0.303918	0	634	0.0126622	-0.00198735	3357.37	-7263.35			0.303918	0	634	1.42978	-2.24715	0	-5266.27		0.303918	0	634	1.62905	3.95624	0	-5266.27		0.303918	0	634	1.91468	3.23965
0.459662	0	639	0.0650317	-0.00339145	-2026.79	-5763.17						0.459662	0	639	0.479201	-0.775581	-26754.3	-146110		0.459662	0	639	0.0012748	-0.000142583	-229.943	206.663			0.459662	0	639	0.00297828	-0.000249684	465.921	433.225		0.459662	0	639	0.012488	-0.000537476	-677.129	-1091.5		0.459662	0	639	0.0109312	2.90186e-05
0.415406	0	648	0.0352305	-0.00886923	-360.982	1305.7						0.415406	0	648	0.0727136	0.018244	-4796.35	-15772.5		0.415406	0	648	0.000794154	0.000211112	-495.3	-46.9338			0.415406	0	648	0.0018306	0.000416006	297.758	-220.519		0.415406	0	648	0.00133288	9.86817e-05	370.715	734.721		0.415406	0	648	0.00494052	-0.000283124
0.372466	0	652	0.125029	-0.000438533	-1833.96	-3639.15						0.372466	0	652	1.37045	-1.63711	86259.3	16495.9		0.372466	0	652	0.00167816	0.000146095	-17.674	-307.745			0.372466	0	652	0.00104058	0.00101371	854.407	-80.6943		0.372466	0	652	0.0205688	-0.00125138	1636.84	-3079.29		0.372466	0	652	0.0145822	-0.00157225
0.313662	0	654	0.0189375	0.00241266	-1070.32	4629.02						0.313662	0	654	0.0245186	0.0188188	6393.42	-7510.41		0.313662	0	654	0.00058107	-0.00675386	164.225	6.44608			0.313662	0	654	0.00321092	0.00118449	960.72	289.312		0.313662	0	654	0.00935828	0.00200727	-212.25	137.523		0.313662	0	654	0.00454284	0.000443325
0.356194	0	655	0.050162	0.00655483	-290.741	-4388.53						0.356194	0	655	0.0922964	-0.00783683	-52008.1	-487.58		0.356194	0	655	0.00335871	0.000151903	-95.0291	-182.717			0.356194	0	655	0.00516908	0.000134537	272.925	152.808		0.356194	0	655	0.0135745	-0.000180676	274.826	1012.42		0.356194	0	655	0.0105482	-0.00275845
0.344966	0	671	0.127895	-0.00677027	-2530.07	-1613.79						0.344966	0	671	0.60369	0.0177189	0	-6784.88		0.344966	0	671	0.000948728	0.000254288	-58.7734	82.3643			0.344966	0	671	0.00477589	0.000273024	1055.11	838.995		0.344966	0	671	0.0237618	-0.00337059	1235.71	-4191.96		0.344966	0	671	0.0238501	-0.00190444
0.30083	0	685	0.0290275	-0.000367136	-142.984	-16.2851						0.30083	0	685	0.0519057	0.00195569	3229.09	1488.38		0.30083	0	685	0.000230967	0.000209991	-18.2639	36.7585			0.30083	0	685	0.0027083	0.000148788	-179.156	42.5538		0.30083	0	685	0.00162649	-0.000327663	379.931	181.001		0.30083	0	685	0.00522175	0.000147875
0.485483	0	697	0.0266382	-0.000557402	259.95	-297.917						0.485483	0	697	0.0121022	0.0237855	-23416.2	-8627.85		0.485483	0	697	0.00156805	0.000141997	3219.64	1144.25			0.485483	0	697	0.00226104	-0.000927044	-4987.3	-2281.68		0.485483	0	697	0.00633407	0.000847082	-1872.77	2287.76		0.485483	0	697	0.00667502	0.000544124
0.455941	0	698	0.0913508	-0.000937283	1735.14	4377.33						0.455941	0	698	0.87982	-1.31028	183434	-10777.3		0.455941	0	698	0.000562571	5.36449e-05	-197.162	-146.816			0.455941	0	698	0.00847267	-0.00036966	-5.56865	993.239		0.455941	0	698	0.00500131	0.000652446	-703.906	-1584.34		0.455941	0	698	0.0152359	-0.000444007
0.316823	0	702	0.0283195	-0.000400948	-704.991	-2295.55						0.316823	0	702	3.39392	-1.39228	0	-5723.02		0.316823	0	702	0.00290125	-0.00235795	1719.21	-121.561			0.316823	0	702	0.0149298	0.00260399	2300.14	2654.32		0.316823	0	702	0.0261749	0.0218805	73259.5	-33518.7		0.316823	0	702	0.0108279	0.0605233
0.431349	0	721	0.0219968	0.00297142	789.685	3893.88						0.431349	0	721	0.0435438	0.0117801	-27803.1	-12428.9		0.431349	0	721	0.000498661	-8.9e-05	138.619	9.45725			0.431349	0	721	0.00208096	0.000248568	78.7287	-189.049		0.431349	0	721	0.00140539	-5.51431e-05	858.556	974.964		0.431349	0	721	0.000552638	0.000162817
0.352378	0	724	0.0198601	-0.00070871	508.145	-558.521						0.352378	0	724	0.0564368	0.0201818	-18791	-3899.93		0.352378	0	724	0.000687511	5.10828e-05	-67.3378	13.8853			0.352378	0	724	0.00115025	0.00011691	421.295	-79.1428		0.352378	0	724	0.00694547	0.00027379	649.617	-267.728		0.352378	0	724	0.00178274	-0.000704548
0.430992	0	728	0.012453	0.0011535	-1579.29	9635.39						0.430992	0	728	0.00213373	-0.00322336	-24402.3	2856.75		0.430992	0	728	0.00119466	-0.000154287	-236.416	40.1119			0.430992	0	728	0.00196937	8.77312e-05	217.397	-332.828		0.430992	0	728	0.00748348	0.000213671	-226.263	-607.458		0.430992	0	728	0.00149864	0.000304692
0.365659	0	731	0.0184212	0.000245989	-1239.76	5193.65						0.365659	0	731	0.0350212	-0.0194039	3571.84	-23017.2		0.365659	0	731	0.00158783	0.000241174	-95.1223	-98.3164			0.365659	0	731	0.00392506	-0.000361848	290.305	-141.852		0.365659	0	731	0.00116933	7.27612e-05	-278.272	-576.511		0.365659	0	731	0.00292698	1.13908e-05
0.491863	0	750	0.029235	0.00163441	-945.387	-1280.37						0.491863	0	750	1.65627	0.036181	404084	528562		0.491863	0	750	0.0708693	-0.000984942	-9865.8	7644.75			0.491863	0	750	4.19315	-0.385275	0	-13793.6		0.491863	0	750	10.976	-7.74193	0	-13793.6		0.491863	0	750	2.96875	1.32733
0.325827	0	751	0.0262762	1.44243e-05	226.753	-2477.13						0.325827	0	751	0.0226575	-0.0011974	-1681.84	-1064.89		0.325827	0	751	0.000865998	-1.51524e-05	56.9579	-128.245			0.325827	0	751	0.00528462	2.81085e-06	173.314	324.42		0.325827	0	751	0.00818429	0.000148163	-373.35	-16.6934		0.325827	0	751	0.00245498	-0.000121153
0.363817	0	756	0.128499	-0.000986298	543.82	-2677.12						0.363817	0	756	0.320679	-2.23558	0	-7546.68		0.363817	0	756	0.00261589	-0.000450201	141.819	342.637			0.363817	0	756	0.00582199	0.000759074	525.936	-1021.49		0.363817	0	756	0.0227858	0.00316284	-10691.9	-1878.99		0.363817	0	756	0.00848192	-0.00013153
0.454852	0	758	0.012439	0.00460535	744.583	-6980.36						0.454852	0	758	0.0793789	-0.0408349	112513	16870.1		0.454852	0	758	0.00214885	0.000131453	-33.5298	-502.652			0.454852	0	758	0.00428971	-0.000253911	644.566	25.4031		0.454852	0	758	0.0047646	0.00115414	858.254	-592.428		0.454852	0	758	0.00415252	-0.00374865
0.453	0	761	0.000110559	-0.00012515	-237.822	-143.646						0.453	0	761	0.000235886	0.000202248	-883.553	1013.64		0.453	0	761	3.20797e-05	-2.75594e-05	-19.946	-6.83979			0.453	0	761	0.000222978	-0.000157638	1.99571	18.0028		0.453	0	761	0.000230311	-0.000171945	113.109	47.9026		0.453	0	761	0.000259699	0.000171254
0.471449	0	762	0.0179599	-0.00093509	1251.1	-994.192						0.471449	0	762	0.0890796	-0.00350626	-9892.19	2309.01		0.471449	0	762	0.000578765	-2.15998e-05	-209.653	9.8877			0.471449	0	762	0.000611481	7.20331e-05	-17.8872	-149.346		0.471449	0	762	0.0023609	-0.000496804	518.5	268.011		0.471449	0	762	0.00997442	0.0039627
0.379962	0	765	0.0733866	0.00181939	37.3354	-2162.05						0.379962	0	765	0.0702889	-0.0587525	-43092.9	-6058.56		0.379962	0	765	0.0017927	0.000104125	-28.2947	-193.754			0.379962	0	765	0.00504213	-0.00022717	-156.395	70.709		0.379962	0	765	0.0153566	0.000115088	-42.7844	-135.003		0.379962	0	765	0.00752516	0.00102589
0.303465	0	784	0.0968776	-0.0014541	466.188	-505.224						0.303465	0	784	0.990954	-0.99597	-9158	692.166		0.303465	0	784	0.00323689	0.000384192	188.278	-348.766			0.303465	0	784	0.00637099	0.00263434	52.0435	-835.661		0.303465	0	784	0.0198506	0.00452013	-2062.07	302.19		0.303465	0	784	0.011141	-0.00484587
0.44224	0	804	0.037994	4.85757e-05	-386.538	380.781						0.44224	0	804	0.0158871	2.16812e-05	1413.2	-1254.63		0.44224	0	804	0.0010657	-6.09672e-05	-118.996	-293.148			0.44224	0	804	0.00344606	9.145e-05	-550.135	-859.113		0.44224	0	804	0.00963046	7.92984e-05	-426.78	642.403		0.44224	0	804	0.00341067	-1.95249e-05
0.31847	0	806	0.0741557	0.00243808	-584.092	-5222.59						0.31847	0	806	0.331735	-0.0833493	0	-5782.67		0.31847	0	806	0.00308918	-0.000110236	-127.748	-69.826			0.31847	0	806	0.00698558	0.0012452	-205.493	-221.412		0.31847	0	806	0.0200846	-0.00825803	-6916.14	-23203.1		0.31847	0	806	0.0226929	-0.00265469
0.485504	0	822	0.00230665	6.33523e-05	-151.478	-523.077						0.485504	0	822	0.00201393	-0.000205187	1228.73	149.049		0.485504	0	822	0.000327781	4.66962e-05	223.733	32.0333			0.485504	0	822	0.000956644	5.53364e-05	-228.644	-106.613		0.485504	0	822	0.00383283	-0.000392948	-26.2978	340.549		0.485504	0	822	0.00339433	8.4413e-05
0.320863	0	823	0.0282571	0.00271327	-1251.97	-2599.18						0.320863	0	823	2.23048	-2.17064	0	-5869.89		0.320863	0	823	0.00340661	0.000552326	-527.794	-409.024			0.320863	0	823	0.00381531	0.00035515	-3071.48	1570.15		0.320863	0	823	0.0158365	-0.009882	2335.05	-3913.64		0.320863	0	823	0.176069	-0.687433
0.46181	0	828	0.0265684	-0.00136487	611.988	3660.94						0.46181	0	828	0.000925549	0.00475289	2265.59	25983.9		0.46181	0	828	0.000699363	-3.57221e-05	107.14	-32.4987			0.46181	0	828	0.00283571	-0.000335695	215.885	279.645		0.46181	0	828	0.00165509	9.68691e-05	1036.34	-18.7339		0.46181	0	828	0.00363931	6.97307e-05
0.375012	0	831	0.0114454	0.00132955	-438.088	-1578.17						0.375012	0	831	2.05212	4.02985	0	-8018.26		0.375012	0	831	0.00165506	0.000636881	19.8573	-1106.86			0.375012	0	831	0.026764	0.02245	85359.1	35546.4		0.375012	0	831	0.0969571	0.0809828	-16246	13647.4		0.375012	0	831	0.326174	-0.357895
0.335688	0	832	0.0307024	0.00175545	-1079.04	4354.92						0.335688	0	832	0.013528	0.0286341	-33886.3	-13217.4		0.335688	0	832	0.00067249	-0.000505251	77.0757	136.552			0.335688	0	832	0.00122647	0.000574988	-149.064	88.179		0.335688	0	832	0.00582245	-0.000503887	-1443.48	820.869		0.335688	0	832	0.00360011	9.60243e-06
0.358406	0	850	0.0519337	-0.00266016	424.112	5125.78						0.358406	0	850	0.0195029	-0.0339279	98811.5	-67860.5		0.358406	0	850	0.000870126	0.00885786	990.912	-384.018			0.358406	0	850	0.00534947	0.00707788	-786.731	4587.69		0.358406	0	850	0.00710108	-0.0215722	-1674.31	3657.82		0.358406	0	850	0.00408816	0.0030591
0.307745	0	851	0.0981537	0.00133338	-1262.26	-167.156						0.307745	0	851	2.63598	2.52823	89119.4	-109261		0.307745	0	851	0.00405237	0.000236382	-156.396	-101.436			0.307745	0	851	0.0107625	0.000514678	0.689061	199.035		0.307745	0	851	0.0157087	0.00240723	2945.47	-1272.09		0.307745	0	851	0.00880825	-0.000485095
0.413598	0	852	0.0275031	0.000241407	2352.28	3852.16						0.413598	0	852	1.37829	-2.36637	-119353	-208558		0.413598	0	852	0.00520782	0.000623286	-519.321	-254.45			0.413598	0	852	0.0980718	0.153726	-0.930894	-9754.62		0.413598	0	852	5.0959	-2.15131	0	-9753.19		0.413598	0	852	1.92611	-2.49793
0.40506	0	853	0.0052426	-0.000792536	-791.562	407.721						0.40506	0	853	2.332	-1.93916	-35069.5	-99093.1		0.40506	0	853	0.000958499	0.000238659	-96.2625	33.6298			0.40506	0	853	0.00157019	0.00134158	-1658.17	-1582.05		0.40506	0	853	0.0112044	-0.00103053	-1742.81	13877.2		0.40506	0	853	0.0318534	0.0107833
0.410758	0	904	0.0127974	0.00106253	172.464	-2654.39						0.410758	0	904	1.6418	0.521545	-125598	32614.5		0.410758	0	904	0.00670684	-9.91575e-05	-915.147	21.5774			0.410758	0	904	1.30752	-2.93092	-0.922438	-9620.95		0.410758	0	904	3.13472	1.45387	0	-9619.73		0.410758	0	904	1.71688	2.17839
0.381512	0	921	0.0229071	-0.000766709	-2730.62	190.581						0.381512	0	921	4.68576	-2.61681	0	-8298.62		0.381512	0	921	0.00312512	-0.000555842	254.05	226.241			0.381512	0	921	0.0108155	-0.00203762	113.267	-9841.55		0.381512	0	921	0.0379604	0.0435538	-9808.5	25176.1		0.381512	0	921	0.0169021	-0.0058649
0.393744	0	922	0.0703069	0.00113628	-63.8352	-636.147						0.393744	0	922	0.106037	-0.20773	187145	36066.7		0.393744	0	922	0.00242248	0.00017248	-176.253	-615.644			0.393744	0	922	0.00583395	-0.000270029	-38.2634	-213.461		0.393744	0	922	0.00510357	0.00151544	-1703.79	-892.442		0.393744	0	922	0.00908552	-0.00175262
0.338178	0	925	0.101945	0.0274651	-43.0442	3067.39						0.338178	0	925	0.217281	0.323553	100820	42817.9		0.338178	0	925	0.0019908	-5.61758e-05	-11.6458	9.05748			0.338178	0	925	0.0023665	0.000127742	-316.991	510.438		0.338178	0	925	0.00873342	0.00256361	-4.06424	552.237		0.338178	0	925	0.0123697	0.00076356
0.39443	0	936	0.108704	0.00261556	-690.1	-8046.92						0.39443	0	936	1.59498	1.18693	-52802.9	119183		0.39443	0	936	0.00421423	4.13898e-05	15.5838	-97.35			0.39443	0	936	0.00778216	-0.00887901	153.116	-483.65		0.39443	0	936	0.00896392	-0.00624341	-540.29	-2240.64		0.39443	0	936	0.0308506	0.000467447
0.44921	0	937	0.0102753	0.00332698	-3136.76	6003.57						0.44921	0	937	0.00615361	0.000674931	4526.24	2652.32		0.44921	0	937	0.00165985	9.88812e-06	-98.6358	0.802333			0.44921	0	937	0.00207841	-5.3487e-05	-867.149	-214.645		0.44921	0	937	0.00112293	5.34946e-05	-1541.36	52.8875		0.44921	0	937	0.00352785	-7.4651e-06
0.44003	0	940	0.0672143	-0.0018374	-191.22	-2811.7						0.44003	0	940	0.186344	0.279023	36031.1	-112348		0.44003	0	940	0.00124586	-0.000113951	-321.601	-31.6717			0.44003	0	940	0.00292581	-0.000101754	308.611	593.724		0.44003	0	940	0.0101344	-0.000662344	-511.42	-339.833		0.44003	0	940	0.00904664	0.000855353
0.363116	0	945	0.0067016	0.00015275	90.9999	2897.28						0.363116	0	945	0.0521371	0.00705368	-952.102	7813.99		0.363116	0	945	0.000482134	4.83165e-05	-12.2237	-15.911			0.363116	0	945	0.000516295	1.28728e-05	219.407	-40.1501		0.363116	0	945	0.00565743	0.000146229	230.27	142.864		0.363116	0	945	0.00258402	3.83527e-05
0.399221	0	961	0.0117718	0.00707831	-118.198	1517.73						0.399221	0	961	0.00150308	0.0011339	-1706.83	-1168.58		0.399221	0	961	3.86921e-05	3.81492e-06	12.3395	2.77793			0.399221	0	961	7.47396e-05	6.09275e-05	4.37243	12.9795		0.399221	0	961	0.00024139	0.000107045	-155.387	-1.5824		0.399221	0	961	6.04853e-05	-2.90411e-06
0.354447	0	982	0.0369506	-0.00121473	550.155	-557.604						0.354447	0	982	0.0945993	0.0203678	-69199.3	60193.8		0.354447	0	982	0.001144	-0.000105499	20.6728	-86.1124			0.354447	0	982	0.00378908	-0.000555616	-95.7862	-358.073		0.354447	0	982	0.00509988	-0.000310239	-1440.75	-366.909		0.354447	0	982	0.00395809	-0.000697986
0.481801	0	983	0.0375392	-0.000360859	1779.81	-4591.39						0.481801	0	983	0.0214039	-0.000793826	-2354.49	-4590.49		0.481801	0	983	0.00110286	-0.000108107	190.213	-202.07			0.481801	0	983	0.00595957	-0.000257599	224.227	558.734		0.481801	0	983	0.0099652	0.000113073	-1589.91	-36.313		0.481801	0	983	0.0038306	-0.000362314
0.42892	0	986	0.0648718	-0.000222596	1297.08	-2750.31						0.42892	0	986	0.0372246	-0.0239814	44865.9	-72219.2		0.42892	0	986	0.00210388	-9.25516e-05	4.87382	-539.516			0.42892	0	986	0.00398191	-0.000167599	-368.347	-452.316		0.42892	0	986	0.0107314	0.000775209	3168.02	199.946		0.42892	0	986	0.00650737	0.00226226
0.415632	0	999	0.00859743	0.00116908	1058.81	-393.95						0.415632	0	999	4.11628	-1.36262	135017	-149036		0.415632	0	999	0.00177336	-6.4196e-05	39.4336	661.798			0.415632	0	999	0.0129418	-0.0518598	31456.3	24674.9		0.415632	0	999	0.0228054	0.00456954	47653.8	-21529.9		0.415632	0	999	0.0404412	0.0292627
0.412723	0	1002	0.00708937	-0.000790627	381.46	-587.511						0.412723	0	1002	1.53473	-2.16422	-92350.9	788500		0.412723	0	1002	0.00168435	8.84052e-05	137.952	180.806			0.412723	0	1002	0.00438079	-0.000820147	-2004.24	2128.11		0.412723	0	1002	0.0235139	0.00214496	1895.42	-1798.34		0.412723	0	1002	0.0280781	-0.00519482
0.406458	0	1010	0.0326328	0.0021579	214.821	-739.396						0.406458	0	1010	0.0425087	0.033876	-68429.9	-84248.8		0.406458	0	1010	0.000903273	0.000629428	32.3632	292.938			0.406458	0	1010	0.000950569	-0.00101606	158.088	-550.484		0.406458	0	1010	0.00300409	0.000492102	271.413	-378.266		0.406458	0	1010	0.00775604	0.00114745
0.379176	0	1012	0.0748747	-0.00040734	-1531.59	506.242						0.379176	0	1012	0.744831	-0.590562	630669	-39932.3		0.379176	0	1012	0.000722734	0.000101616	-369.292	-67.2204			0.379176	0	1012	0.00675161	-0.000725161	787.081	404.208		0.379176	0	1012	0.00920624	0.000695692	3156.79	-1685.78		0.379176	0	1012	0.0185306	-4.48134e-05
0.413599	0	1035	0.041358	0.0055945	-230.439	-7004.73						0.413599	0	1035	0.149419	-0.0183147	0	-9753.26		0.413599	0	1035	0.00174961	-6.00871e-05	-163.122	-187.002			0.413599	0	1035	0.00555276	3.28952e-05	159.178	299.457		0.413599	0	1035	0.0158832	-0.000694528	759.65	67.8775		0.413599	0	1035	0.0084636	0.000147403
0.487174	0	1041	0.0580299	-0.000171646	-132.239	-1627.17						0.487174	0	1041	0.0416132	-0.00721096	-76219.9	3773.27		0.487174	0	1041	0.00161612	-2.96757e-05	-245.717	199.07			0.487174	0	1041	0.0030953	0.000238493	-426.354	124.26		0.487174	0	1041	0.00566446	-6.15428e-05	-2483.74	400.297		0.487174	0	1041	0.0089893	-0.0005936
0.34327	0	1045	0.104514	-0.00138775	595.009	1450.68						0.34327	0	1045	0.67808	0.1022	-71058.2	-236974		0.34327	0	1045	0.00335556	-0.00061398	104.175	259.71			0.34327	0	1045	0.00448146	0.000579904	-913.253	138.117		0.34327	0	1045	0.0196849	-0.000778428	-1322.8	-40.0447		0.34327	0	1045	0.00956618	-0.00193193
0.312732	0	1047	0.0252178	0.00276478	667.811	-2438.03						0.312732	0	1047	1.68275	-0.0156063	-60968.2	-134672		0.312732	0	1047	0.00333016	-0.000172909	567.515	-125.581			0.312732	0	1047	0.0115095	0.0109299	-1415.44	-1958.4		0.312732	0	1047	3.21175	-1.31541	-750320	-716047		0.312732	0	1047	1.90338	-0.454369
0.349953	0	1049	0.00583562	0.000639447	-1174.4	1918.73						0.349953	0	1049	0.00206482	0.00141684	1100.67	-488.982		0.349953	0	1049	0.000889163	-3.15733e-05	-15.0139	40.4617			0.349953	0	1049	0.0013189	7.92507e-05	-299.672	-92.6151		0.349953	0	1049	0.000991888	-4.94736e-05	-483.132	2.3598		0.349953	0	1049	0.00156398	0.00027472
0.302302	0	1067	0.067504	-0.00511952	-584.295	-3648.28						0.302302	0	1067	0.0158198	0.0383511	9098.27	-11146		0.302302	0	1067	0.00113471	-7.81236e-05	74.8858	145.543			0.302302	0	1067	0.00180502	0.000183228	165.388	15.2139		0.302302	0	1067	0.00397139	-0.000659148	212.882	648.282		0.302302	0	1067	0.00995525	-0.011351
0.446834	0	1070	0.0173474	-0.000628446	1496.63	1803.79						0.446834	0	1070	1.23601	-0.606599	57343.4	10838.6		0.446834	0	1070	0.00092584	-0.00049219	-270.42	1011.81			0.446834	0	1070	0.0817963	0.000651462	-61338.2	-10368.9		0.446834	0	1070	0.0327308	-0.0140866	13657.4	-32282.1		0.446834	0	1070	0.232849	-0.69252
0.496204	0	1074	0.00650316	-0.00488671	-720.674	-3173.15						0.496204	0	1074	0.0489974	-0.0447837	20213.9	-15082.7		0.496204	0	1074	0.000676742	7.61622e-05	34.5579	-297.577			0.496204	0	1074	0.00133785	0.000320213	-422.289	-234.829		0.496204	0	1074	0.00614903	-0.000888678	-278.838	121.054		0.496204	0	1074	0.00810467	0.0030372
0.45085	0	1087	0.000162734	-0.000168874	90.3117	-369.862						0.45085	0	1087	0.00277912	-0.000852644	-1214.21	-53.9914		0.45085	0	1087	0.000190201	0.000291218	-140.221	146.965			0.45085	0	1087	0.000501997	-0.000112928	141.434	87.8686		0.45085	0	1087	7.14595e-05	1.12912e-05	274.51	168.29		0.45085	0	1087	0.00026995	-1.64621e-05
0.381728	0	1088	0.0365815	0.000613878	1757	5696.36						0.381728	0	1088	0.0081949	-0.0123195	15373.6	10950.7		0.381728	0	1088	0.000143897	-1.75659e-06	81.7409	11.4639			0.381728	0	1088	0.00258425	-0.000299475	240.448	40.494		0.381728	0	1088	0.00426255	0.000297534	98.2631	-773.468		0.381728	0	1088	0.00924908	-0.000507233
0.315496	0	1091	0.0686722	-0.00426599	-900.041	-4532.19						0.315496	0	1091	1.64381	1.4947	-89617.1	-2702.44		0.315496	0	1091	0.00297731	0.000363985	-252.472	-209.206			0.315496	0	1091	0.00632133	-6.90674e-05	-580.503	62.1864		0.315496	0	1091	0.0210436	0.00513989	2758.21	1502.12		0.315496	0	1091	0.0135893	-0.00458916
0.460662	0	1095	0.0204488	-0.000352506	1.01196	-78.6831						0.460662	0	1095	0.020192	0.00720937	-3784.31	-27379.6		0.460662	0	1095	0.000863097	-3.19187e-05	101.847	-49.2749			0.460662	0	1095	0.000755801	6.57532e-05	-381.81	-2.82891		0.460662	0	1095	0.00357741	-0.00026174	-654.249	-949.954		0.460662	0	1095	0.00868496	-0.000408013
0.44348	0	1133	0.044974	-0.00187001	-1240.79	-10043.2						0.44348	0	1133	0.051697	0.059173	25096.3	11944.9		0.44348	0	1133	0.000543336	2.069e-05	493.396	-91.5396			0.44348	0	1133	0.00406865	-2.48748e-05	345.571	-53.3288		0.44348	0	1133	0.0103712	0.000221208	630.46	-1196.98		0.44348	0	1133	0.0127964	-0.00162594
0.372555	0	1136	0.0310001	0.00313248	1614.37	-2288.11						0.372555	0	1136	0.0465483	-0.0191486	-22686.9	-6809.07		0.372555	0	1136	0.00330097	-4.57201e-05	4.35913	-158.546			0.372555	0	1136	0.00285634	-3.32053e-05	177.347	-74.7946		0.372555	0	1136	0.00812081	0.000590382	-142.365	318.185		0.372555	0	1136	0.00536111	-0.000525506
0.306412	0	1137	0.0115067	0.00214582	-416.752	2026.14						0.306412	0	1137	0.0189438	0.000584278	985.488	359.347		0.306412	0	1137	0.00195904	-1.42943e-05	2.16093	66.891			0.306412	0	1137	0.00226448	0.000106867	-359.421	-206.065		0.306412	0	1137	0.00304852	-0.000152128	-702.482	-5.52136		0.306412	0	1137	0.00465044	7.6121e-05
0.473022	0	1138	0.0638946	-0.00356091	-753.935	-792.089						0.473022	0	1138	0.101909	-0.00311805	14534.3	-13827.1		0.473022	0	1138	0.000492073	-0.000112	-432.47	146.941			0.473022	0	1138	0.00157856	-0.000375069	-1276.12	826.551		0.473022	0	1138	0.0153674	-0.000510921	-1140.52	1164.65		0.473022	0	1138	0.0118605	0.000483578
0.362387	0	1140	0.0293355	-0.00185463	-155.142	-238.201						0.362387	0	1140	0.0702251	0.00972783	-8939.93	-31424.2		0.362387	0	1140	0.000630967	-4.51124e-05	-117.375	8.57926			0.362387	0	1140	0.00169907	3.13065e-05	-12.2702	81.8823		0.362387	0	1140	0.00882637	-0.000756723	-87.0655	581.992		0.362387	0	1140	0.0205511	-0.00228874
0.364964	0	1162	0.0525035	-0.000655171	-133.121	-1004.73						0.364964	0	1162	0.0847099	0.0366908	-24794.1	-20086		0.364964	0	1162	0.00143303	-4.22951e-05	-174.457	131.631			0.364964	0	1162	0.00260377	-6.93983e-06	108.604	-317.824		0.364964	0	1162	0.00512965	2.54873e-05	239.264	-2350.14		0.364964	0	1162	0.00214764	-0.000420612
0.347947	0	1168	0.0630686	0.007979	-178.013	-6005.77						0.347947	0	1168	0.0567882	-0.117827	56892.4	-22358.9		0.347947	0	1168	0.00268267	-1.76624e-05	-44.6401	-67.2279			0.347947	0	1168	0.00390522	1.00071e-06	347.383	221.667		0.347947	0	1168	0.000926714	-0.000422913	-13.6269	259.727		0.347947	0	1168	0.0158763	0.000382247
0.31368	0	1176	0.0482071	8.45835e-05	938.086	780.964						0.31368	0	1176	0.0247252	0.0137623	2526.7	-1247.98		0.31368	0	1176	0.00204035	-0.000218367	-9.54247	93.5341			0.31368	0	1176	0.00361943	-0.00044188	1.32793	-318.713		0.31368	0	1176	0.0155183	0.00178512	-2097.16	-959.325		0.31368	0	1176	0.00684673	0.00168633
0.455337	0	1179	0.00737022	0.00162197	-362.821	788.19						0.455337	0	1179	0.0270435	-0.00672521	-31188.6	-31509.5		0.455337	0	1179	0.000177615	6.04273e-05	-43.4879	13.6122			0.455337	0	1179	0.000242852	9.59993e-05	-58.5981	-142.482		0.455337	0	1179	0.000242033	4.20777e-05	143.989	267.907		0.455337	0	1179	0.00117343	0.000814827
0.352778	0	1183	0.0189969	0.00152901	-1335.19	7571.65						0.352778	0	1183	0.02218	0.00400609	10905.7	749.997		0.352778	0	1183	0.00182437	-0.00124995	-116.97	-67.3653			0.352778	0	1183	0.0016359	-2.34976e-05	-160.831	-451.548		0.352778	0	1183	0.0126943	-8.68911e-05	447.395	122.449		0.352778	0	1183	0.00186877	-0.00103394
0.323222	0	1185	0.00870361	0.000207156	-753.422	1790.61						0.323222	0	1185	3.99757	0.697806	2063.86	-5694.94		0.323222	0	1185	0.00219933	0.000408436	-296.388	-245.354			0.323222	0	1185	0.0425931	-0.00131211	-6092.61	7479.8		0.323222	0	1185	0.0178198	0.00109674	-23812.3	12058.8		0.323222	0	1185	0.0114035	-0.0256133
0.43044	0	1188	0.0354376	0.00018745	205.933	-264.945						0.43044	0	1188	0.0712648	-0.0468201	-9002.54	-72479.9		0.43044	0	1188	0.00189396	7.189e-06	-80.6542	-90.401			0.43044	0	1188	0.00314211	-0.000448363	-47.1816	86.3046		0.43044	0	1188	0.0102475	0.000580775	978.495	-1177.16		0.43044	0	1188	0.00837288	0.000423036
0.301259	0	1190	0.0368999	-0.00372059	646.673	3236.36						0.301259	0	1190	2.39265	1.65345	0	-5174.52		0.301259	0	1190	0.000908408	0.000446998	-258.68	-11.6821			0.301259	0	1190	0.00486969	0.0012567	-638.822	2890.56		0.301259	0	1190	0.0181368	0.0115354	575.819	-795.637		0.301259	0	1190	0.0237265	-0.0405063
0.413048	0	1202	0.0332783	0.00213448	326.841	-1284.03						0.413048	0	1202	0.0433074	-0.00798885	8579.46	7789.15		0.413048	0	1202	0.000750461	2.33478e-05	80.7656	-203.241			0.413048	0	1202	0.00109317	-4.34203e-05	-103.46	156.144		0.413048	0	1202	0.00139474	1.57397e-05	41.6515	840.521		0.413048	0	1202	0.00442025	-0.000952908
0.376644	0	1203	0.0647972	0.00173354	785.108	-2641						0.376644	0	1203	0.0626432	0.0243667	30625.2	21729.6		0.376644	0	1203	0.00182099	-0.000136669	16.2161	-208.616			0.376644	0	1203	0.00370523	0.000861766	87.2272	-840.867		0.376644	0	1203	0.0171614	-0.00241311	1968.81	-683.778		0.376644	0	1203	0.00436414	-0.00264967
0.492173	0	1206	0.0645901	0.00182447	-1875.39	-2363.93						0.492173	0	1206	0.0533394	-0.0186219	-11596.5	95047.9		0.492173	0	1206	0.00227318	-0.00173104	-6912.24	6598.91			0.492173	0	1206	0.00396854	-0.00299529	796.264	-937.178		0.492173	0	1206	0.0135297	-0.00129386	143.749	193.417		0.492173	0	1206	0.0151463	0.000312769
0.381597	0	1208	0.0572139	0.00513859	289.688	-6634.25						0.381597	0	1208	0.411327	-0.503108	34253.8	71358.2		0.381597	0	1208	0.00301981	-0.00036683	-289.934	-199.86			0.381597	0	1208	0.00186262	-0.000221528	609.027	291.217		0.381597	0	1208	0.013298	0.00199542	-1138.43	1203.59		0.381597	0	1208	0.0131468	-7.18203e-05
0.471612	0	1209	0.133528	0.00175637	1419.76	-9316.97						0.471612	0	1209	0.220807	0.38896	-16068.6	-131046		0.471612	0	1209	0.000842996	9.31672e-05	119.839	370.544			0.471612	0	1209	0.00520638	0.00033024	-1429.03	-803.523		0.471612	0	1209	0.00502372	0.00105538	-825.957	2314.53		0.471612	0	1209	0.0236971	-0.00258864
0.437821	0	1222	0.075321	-0.00117188	-617.835	8412.67						0.437821	0	1222	0.0754981	0.0708455	-10970.2	-11351.3		0.437821	0	1222	0.00106057	0.000253711	39.1637	-172.594			0.437821	0	1222	0.00688254	-0.000477395	-761.329	369.519		0.437821	0	1222	0.00569511	-0.000398307	307.31	252.548		0.437821	0	1222	0.0104217	0.00092718
0.48941	0	1226	0.0562732	-0.000793728	-479.044	-2494.34						0.48941	0	1226	0.0370286	-0.0457646	-32670.4	-69184.3		0.48941	0	1226	0.00108046	-2.23602e-05	-336.837	-97.7011			0.48941	0	1226	0.0030241	0.000546295	-691.938	-1440.32		0.48941	0	1226	0.00616437	-0.000506569	-4320.16	-1388.38		0.48941	0	1226	0.00869862	-0.000525462
0.374394	0	1230	0.0990361	0.000437189	943.3	-1348.17						0.374394	0	1230	0.197486	-0.803799	0	-7991.86		0.374394	0	1230	0.000924922	2.72626e-05	92.0843	-106.345			0.374394	0	1230	0.00500416	-6.15107e-05	179.77	-180.421		0.374394	0	1230	0.0180864	0.00125837	-91.9265	-1886.08		0.374394	0	1230	0.0112249	-0.000799196
0.430562	0	1232	0.0578051	-0.000841918	-256.891	-733.1						0.430562	0	1232	0.113326	0.00308772	-74288.4	10970.9		0.430562	0	1232	0.00257382	0.00429397	241.846	3181.51			0.430562	0	1232	0.00201254	0.00770046	310.545	-6592.29		0.430562	0	1232	0.00501081	-0.000915985	3059.77	-934.746		0.430562	0	1232	0.0090099	0.000498751
0.459904	0	1233	0.0222326	0.000741854	-1226.05	-1187.75						0.459904	0	1233	1.03635	1.823	73283.7	-43963.8		0.459904	0	1233	0.00338914	-0.000156274	-588.833	415.778			0.459904	0	1233	0.0379925	-0.0156009	25604.2	-3916.73		0.459904	0	1233	0.0623412	-0.0398177	-80434.5	7613.89		0.459904	0	1233	0.120026	-0.263833
0.412077	0	1249	0.00816075	-0.00212422	1044.37	-5321.81						0.412077	0	1249	0.0306224	-0.00115791	-3549.88	-94.8807		0.412077	0	1249	0.000803095	-2.29524e-05	-62.901	144.011			0.412077	0	1249	0.00363975	0.000345904	339.11	46.2452		0.412077	0	1249	0.00772662	0.000430217	-418.524	-114.702		0.412077	0	1249	0.00231566	0.000366401
0.488453	0	1260	0.0819598	0.00347048	613.066	-3426.2						0.488453	0	1260	0.153755	-0.0305005	-41877.7	50769.9		0.488453	0	1260	0.00168649	0.000112145	300.858	228.903			0.488453	0	1260	0.00239946	-0.00071213	-28.2898	695.531		0.488453	0	1260	0.00351371	-0.000998076	25.9548	-2231.57		0.488453	0	1260	0.0218791	-0.000318665
0.458552	0	1276	0.0212385	-0.000300687	-2.67896	2953.18						0.458552	0	1276	0.0154125	0.00444253	-13933.9	5001.54		0.458552	0	1276	0.000537773	-1.25785e-05	32.2717	-8.36273			0.458552	0	1276	0.00195881	9.37714e-06	254.47	212.031		0.458552	0	1276	0.00122984	-0.000238164	640.36	-37.5708		0.458552	0	1276	0.00251841	0.000423578
0.392888	0	1285	0.0207964	-0.000171438	-131.503	33.5991						0.392888	0	1285	0.0412439	0.0129798	-19515.3	11171.4		0.392888	0	1285	0.000629724	3.02723e-05	-149.661	7.73471			0.392888	0	1285	0.00263238	0.000274834	-48.8035	261.894		0.392888	0	1285	0.00420702	-0.000882389	860.438	720.679		0.392888	0	1285	0.00614638	-0.000908918
0.445445	0	1293	0.0260754	0.00245161	-1357.43	6119.93						0.445445	0	1293	0.00858092	0.000756387	6640.99	9744.04		0.445445	0	1293	0.000790587	0.000141347	54.5447	-51.0502			0.445445	0	1293	0.00362033	-0.000154394	107.37	-418.193		0.445445	0	1293	0.00969708	0.000245043	-1539.92	-507.508		0.445445	0	1293	0.00555078	-0.000279175
0.469482	0	1294	0.00964146	-8.75421e-05	447.757	-2452.36						0.469482	0	1294	0.0102163	-0.00155113	-5293.67	325.073		0.469482	0	1294	0.000198203	-2.1079e-05	-18.4968	23.4516			0.469482	0	1294	0.000703488	0.000153129	6.46574	30.8776		0.469482	0	1294	0.00234018	0.000358297	-227.557	50.1997		0.469482	0	1294	0.00133955	-0.000120181
0.301882	0	1295	0.00389536	0.00010615	181.644	392.945						0.301882	0	1295	0.0112036	0.00217585	-1802.28	-2650.67		0.301882	0	1295	0.000530828	5.09753e-05	237.832	117.197			0.301882	0	1295	0.00255751	-0.00103145	-299.738	-38.1975		0.301882	0	1295	0.0085358	-0.000303273	-123.265	184.224		0.301882	0	1295	0.00681059	0.000621493
0.371904	0	1307	0.0389684	-0.00252703	219.738	5462.52						0.371904	0	1307	0.0487168	0.0780128	-25216.3	31167.4		0.371904	0	1307	0.000869656	0.000199389	-15.028	-4.71717			0.371904	0	1307	0.00362105	0.000293356	363.405	46.2401		0.371904	0	1307	0.00857354	-0.00014408	-96.6609	39.955		0.371904	0	1307	0.0034369	-0.00131418
0.302756	0	1315	0.0876552	-0.00159426	917.591	2309.51						0.302756	0	1315	1.65989	0.196909	0	-5226.09		0.302756	0	1315	0.00124641	-0.000290657	201.991	105.914			0.302756	0	1315	0.00806533	-0.0003795	-369.11	151.004		0.302756	0	1315	0.0110491	-0.000880417	1889.75	-39.428		0.302756	0	1315	0.0129049	0.0125185
0.400512	0	1321	0.0758305	0.00503805	-61.0371	2243.31						0.400512	0	1321	0.110809	0.0280409	-114711	-103752		0.400512	0	1321	0.00305199	-0.00371487	-5992.02	1402.21			0.400512	0	1321	0.00467081	-0.01382	6218.4	-5020.47		0.400512	0	1321	0.00436633	-0.00260358	-370.503	-639.697		0.400512	0	1321	0.00702612	0.000501486
0.348795	0	1330	0.0143744	-0.000108508	-588.459	785.35						0.348795	0	1330	0.0158211	0.0183488	15314.9	-21133.3		0.348795	0	1330	0.00038765	-4.08396e-06	-72.4244	35.7373			0.348795	0	1330	0.000671289	1.85443e-05	66.4698	-161.871		0.348795	0	1330	0.000499787	-0.000351353	205.735	436.869		0.348795	0	1330	0.00306035	0.00112666
0.418431	0	1332	0.0143179	-0.00149737	1078.93	-4010.86						0.418431	0	1332	0.0260808	-0.000529837	-2329.7	-155.72		0.418431	0	1332	0.000569684	-5.05257e-05	-105.479	96.9579			0.418431	0	1332	0.00306212	0.000225888	252.868	-102.436		0.418431	0	1332	0.00685225	0.000336039	-244.491	231.801		0.418431	0	1332	0.00184927	0.000115699
0.462138	0	1342	0.015305	-2.92477e-05	1015.01	2744.77						0.462138	0	1342	0.0241842	-0.00107289	203.632	-2020.05		0.462138	0	1342	0.00210315	6.11464e-05	139.227	263.931			0.462138	0	1342	0.0026629	0.000178737	-765.974	-707.355		0.462138	0	1342	0.00567511	6.47809e-06	-1531.97	133.556		0.462138	0	1342	0.00596442	0.000301978
0.31571	0	1343	0.00493225	0.00175811	-1430.78	3188.51						0.31571	0	1343	0.0127992	-0.00803353	-1837.92	1260.95		0.31571	0	1343	0.000255842	-0.000441054	0.598851	68.7882			0.31571	0	1343	0.00020643	0.000375656	122.917	-276.143		0.31571	0	1343	0.003259	0.000788898	-321	-25.5257		0.31571	0	1343	0.00400177	-0.000188456
0.391159	0	1349	0.0135767	0.00696946	699.995	-889.785						0.391159	0	1349	0.57303	0.703703	98285.2	-127374		0.391159	0	1349	0.000570301	-0.000120878	172.47	25.377			0.391159	0	1349	0.00182441	-0.000186984	473.473	1008.51		0.391159	0	1349	0.00665799	0.00252715	1313.43	-3353.66		0.391159	0	1349	0.00724892	-0.000692824
0.44663	0	1355	0.0365091	5.43199e-05	1527.92	-1188.53						0.44663	0	1355	0.0409402	0.0123354	8193.54	8574.33		0.44663	0	1355	0.00121862	4.16527e-05	-28.1457	29.3781			0.44663	0	1355	0.00200321	0.000360894	423.087	-522.828		0.44663	0	1355	0.00824676	-0.000401513	920.131	658.248		0.44663	0	1355	0.00446387	-0.000133106
0.442158	0	1358	0.0117767	0.000511535	52.9071	3641.89						0.442158	0	1358	0.00868839	-0.00326231	15107.1	-10081.4		0.442158	0	1358	0.000391251	-6.98762e-05	129.231	52.7675			0.442158	0	1358	0.000247419	0.000183663	10.7048	-98.8269		0.442158	0	1358	0.00235523	5.57561e-05	861.418	582.441		0.442158	0	1358	0.00178107	0.000264644
0.44106	0	1379	0.0717505	0.000533427	-1240.92	-10251.6						0.44106	0	1379	0.671581	-0.656065	-54310.6	113794		0.44106	0	1379	0.00317169	1.18779e-05	41.5188	-450.27			0.44106	0	1379	0.00621309	0.00059907	-783.676	-257.067		0.44106	0	1379	0.0193661	-0.000424579	-756.924	-6422.71		0.44106	0	1379	0.018282	0.00232178
0.372009	0	1380	0.112235	-0.00408339	962.635	64.8365						0.372009	0	1380	1.77144	-1.23371	-166440	418837		0.372009	0	1380	0.00185613	0.000773896	209.402	-530.427			0.372009	0	1380	0.00417009	-0.000833716	-496.512	-115.338		0.372009	0	1380	0.0197141	-0.00721644	-4056.75	-5634.46		0.372009	0	1380	0.0103858	0.00113198
0.471866	0	1383	0.0516391	-0.000947221	-216.285	6724.42						0.471866	0	1383	0.056771	-0.0285682	-91649	47082.8		0.471866	0	1383	0.000974667	-0.000159085	937.747	899.692			0.471866	0	1383	0.00347866	-0.00163681	164.693	-1298.64		0.471866	0	1383	0.00586431	0.000851481	-2311.55	-1724.39		0.471866	0	1383	0.00608065	0.00130799
0.495431	0	1386	0.050863	0.00170724	-1596.1	10005.6						0.495431	0	1386	0.131642	-0.0619493	-53037.9	75165.2		0.495431	0	1386	0.000213972	-5.56783e-05	-95.7375	45.2313			0.495431	0	1386	0.00459146	-0.000199318	376.33	-108.602		0.495431	0	1386	0.00423369	-0.000212046	1818.11	112.708		0.495431	0	1386	0.0145021	-5.40275e-05
0.476472	0	1388	0.1016	0.00140797	-1040.77	-8829.95						0.476472	0	1388	0.347755	-0.121361	-19981	-50718.6		0.476472	0	1388	0.00354067	0.000179929	537.289	541.183			0.476472	0	1388	0.00107296	-4.61304e-05	-1461.89	219.735		0.476472	0	1388	0.0109393	-0.000713629	1996.06	-533.209		0.476472	0	1388	0.0245524	-0.00133338
0.457477	0	1390	0.0379502	-0.00149486	-2772.7	-4232.81						0.457477	0	1390	0.00954456	0.000209926	838.029	-537.864		0.457477	0	1390	0.00102516	-5.20723e-05	-21.52	-412.099			0.457477	0	1390	0.00573064	0.000168648	-178.347	-515.712		0.457477	0	1390	0.0132299	0.000239696	-610.858	260.736		0.457477	0	1390	0.00239781	-0.000155845
0.478244	0	1395	0.00873734	-0.00248621	1770.96	-8174.11						0.478244	0	1395	0.0364895	0.00158063	-3174.57	-1001.12		0.478244	0	1395	0.000994107	8.97573e-05	-137.803	236.72			0.478244	0	1395	0.00595663	0.000165239	999.31	242.992		0.478244	0	1395	0.0105087	0.000189606	-493.678	-713.154		0.478244	0	1395	0.00282086	0.000300922
0.371916	0	1400	0.0283737	-0.000583505	1086.45	-1016.25						0.371916	0	1400	0.0645764	0.0373287	-23714	-8667.8		0.371916	0	1400	0.000496135	7.60503e-05	80.2588	-21.9634			0.371916	0	1400	0.00159766	-0.000180712	-107.725	199.351		0.371916	0	1400	0.00215927	-0.000142575	954.747	-388.865		0.371916	0	1400	0.00536297	9.60659e-05
0.325434	0	1402	0.0411354	0.00115564	84.5283	121.443						0.325434	0	1402	0.0754563	0.0594153	-7490.76	26518.1		0.325434	0	1402	0.000611624	-0.000111956	42.74	156.718			0.325434	0	1402	0.001773	-0.000188894	124.437	-629.093		0.325434	0	1402	0.0122639	0.00117368	-206.046	-1127.21		0.325434	0	1402	0.00536234	0.000776853
0.35241	0	1418	0.0323769	-0.000143041	22.1667	331.086						0.35241	0	1418	0.0819911	-0.0187801	-56107.8	-12213.5		0.35241	0	1418	0.000686688	-0.000150539	7.05853	179.474			0.35241	0	1418	0.00128522	0.000188418	48.8203	-645.937		0.35241	0	1418	0.0081981	0.00027963	69.4939	-66.0015		0.35241	0	1418	0.00474491	0.000236442
0.406396	0	1440	0.012934	-0.000319987	443.725	5892.37						0.406396	0	1440	0.0477682	-0.00475646	5735.86	-13883		0.406396	0	1440	0.000790024	2.61797e-05	18.4172	-46.9421			0.406396	0	1440	0.000500329	0.00012283	371.113	-329.785		0.406396	0	1440	0.00721506	-0.000382493	971.859	630.786		0.406396	0	1440	0.00269298	7.13445e-05
0.404617	0	1471	0.0282682	0.00310801	1773.4	-3277.7						0.404617	0	1471	0.0469927	0.00864767	-14592.7	-37051.4		0.404617	0	1471	0.0031943	8.4187e-05	8.93418	-236.212			0.404617	0	1471	0.00244564	-1.95106e-06	300.205	-105.229		0.404617	0	1471	0.00678849	0.000936244	274.242	-1586.45		0.404617	0	1471	0.00367323	-0.00174266
0.488342	0	1474	0.0128296	5.50485e-05	350.026	-680.521						0.488342	0	1474	0.0175232	-0.010934	-19156.3	14141.1		0.488342	0	1474	0.000432399	1.01997e-05	-88.6771	20.0488			0.488342	0	1474	0.000696094	-3.64539e-05	574.451	-93.2808		0.488342	0	1474	0.00399411	0.000848756	1034.46	-569.602		0.488342	0	1474	0.00137096	-0.000240467
0.472504	0	1477	0.0192751	0.000506396	-581.956	-2883.09						0.472504	0	1477	3.98377	0.556158	99089.7	-245098		0.472504	0	1477	0.00579906	-0.000227136	-38.1376	-58.6541			0.472504	0	1477	0.13764	0.147748	19703.8	16539.4		0.472504	0	1477	1.47799	-2.4293	0	-12729.2		0.472504	0	1477	1.43192	-0.587909
0.432763	0	1479	0.0773285	0.00228697	-1539.76	-1838.35						0.432763	0	1479	0.104777	-0.447191	-43615.4	8579.06		0.432763	0	1479	0.00231577	0.000245773	-18.505	-106.821			0.432763	0	1479	0.00335173	-0.00127235	1116.74	780.211		0.432763	0	1479	0.009217	0.00106775	2204.14	-3378.88		0.432763	0	1479	0.01352	6.63743e-05
0.302597	0	1491	0.0784376	-0.000343473	-1290.38	-798.972						0.302597	0	1491	0.0733235	-0.627967	60046.3	-2324.69		0.302597	0	1491	0.00199153	5.95296e-05	19.6366	53.6413			0.302597	0	1491	0.00445398	-3.20621e-05	-18.1004	-243.01		0.302597	0	1491	0.00682146	-0.000112158	-1048.28	205.137		0.302597	0	1491	0.00445219	0.00110755
0.488639	0	1492	0.134923	-0.000594842	5256.13	-3325.36						0.488639	0	1492	0.822218	1.42139	-153877	-95242.4		0.488639	0	1492	0.00204515	-0.000390182	326.621	5.50472			0.488639	0	1492	0.00153678	0.000576644	-619.112	-1743.82		0.488639	0	1492	0.00329499	0.00248251	-1201.59	-454.55		0.488639	0	1492	0.0117921	-0.00158898
0.445679	0	1498	0.0598437	-0.00349238	-1863.67	2609.33						0.445679	0	1498	0.274056	-0.0108181	57855	-91553		0.445679	0	1498	0.00158986	9.45761e-05	8.78353	-401.951			0.445679	0	1498	0.00774667	-0.000292071	560.944	-14.0711		0.445679	0	1498	0.0102958	-0.000219859	-5825.86	3389.48		0.445679	0	1498	0.0151936	0.00305319
0.461039	0	1503	0.0251108	-0.000149212	3579.26	6187.77						0.461039	0	1503	0.0155138	0.00236909	28824.4	16657.8		0.461039	0	1503	0.000293621	1.06988e-05	49.732	35.0417			0.461039	0	1503	0.00123379	-0.00015387	60.2886	148.906		0.461039	0	1503	0.00345224	0.000351949	367.415	-1205.22		0.461039	0	1503	0.00377559	-0.000159987
0.456391	0	1521	0.0635284	-0.00370564	474.677	8690.09						0.456391	0	1521	0.109298	-0.0322127	-76483.3	49663.1		0.456391	0	1521	0.00108805	-0.00130261	37.5099	-702.106			0.456391	0	1521	0.00638655	0.00163992	-3551.19	3908.32		0.456391	0	1521	0.0070005	-0.0105617	5252.62	-4126.46		0.456391	0	1521	0.00792844	-0.00650538
0.39882	0	1530	0.0405859	-0.000589215	641.804	-2366.93						0.39882	0	1530	0.0168434	-0.000929121	-3364.12	-4320.94		0.39882	0	1530	0.000891624	-0.000146718	139.216	-79.1203			0.39882	0	1530	0.00536102	-0.000400494	127.185	186.3		0.39882	0	1530	0.010088	0.00030592	-1340.61	49.7107		0.39882	0	1530	0.00455604	-0.000357888
0.365309	0	1542	0.0822931	0.00492476	-528.334	4010.4						0.365309	0	1542	2.48187	-1.53961	-831790	535771		0.365309	0	1542	0.0028034	-5.45428e-06	182.955	11.2519			0.365309	0	1542	0.00566459	-0.000409853	-257.679	362.128		0.365309	0	1542	0.00758053	-0.00262192	294.551	-1962.87		0.365309	0	1542	0.0194174	0.00145211
0.375726	0	1551	0.0140236	-0.00205022	-1057.38	1076.81						0.375726	0	1551	0.209638	-0.0448595	43753.6	-39946		0.375726	0	1551	0.00060955	-1.41065e-05	-73.6552	-13.5938			0.375726	0	1551	0.00173911	-8.56253e-05	1177.67	-740.508		0.375726	0	1551	0.00326524	0.000250646	-961.549	1978.82		0.375726	0	1551	0.00815668	0.00141576
0.459317	0	1562	0.0830469	0.000603771	600.804	-1996.38						0.459317	0	1562	0.217966	-0.803838	739869	-158692		0.459317	0	1562	0.00222505	-0.000382147	121.835	189.679			0.459317	0	1562	0.00869757	-0.000203774	109.871	1043.92		0.459317	0	1562	0.0164408	-0.000205614	1055.47	999.643		0.459317	0	1562	0.0143577	-0.000743443
0.308657	0	1563	0.00969044	0.00362565	4.51702	19.4603						0.308657	0	1563	0.0604634	-0.0963849	-29798.5	2441.76		0.308657	0	1563	0.000157884	-4.13146e-05	-19.9255	7.57082			0.308657	0	1563	0.000690303	0.000368524	154.485	5.01168		0.308657	0	1563	0.00146851	0.000768897	112.97	19.2863		0.308657	0	1563	0.000359265	6.49255e-05
0.447076	0	1568	0.0327353	0.000220818	-2060.15	-5147.67						0.447076	0	1568	3.62953	0.705691	-319431	131806		0.447076	0	1568	0.0048701	0.000154435	7.77344	-658.658			0.447076	0	1568	0.00716726	-3.05755e-05	-881.762	722.026		0.447076	0	1568	0.00743291	0.000976686	9036.73	4375.13		0.447076	0	1568	0.0291137	-0.00019195
0.38065	0	1587	0.103766	0.004547	-261.091	-7326.24						0.38065	0	1587	0.0983379	0.0915399	38116	-3907.86		0.38065	0	1587	0.00315214	8.44881e-06	234.408	-21.0443			0.38065	0	1587	0.00450871	0.000142815	253.301	-211.028		0.38065	0	1587	0.000668013	0.000526095	1921.69	-4450.5		0.38065	0	1587	0.0123883	1.26206e-05
0.47723	0	1590	0.0945997	-0.00198582	1869.52	3260.62						0.47723	0	1590	1.93182	-0.581893	-378681	21737.5		0.47723	0	1590	0.000773549	-0.000435801	259.044	441.235			0.47723	0	1590	0.00676573	0.000309607	-54.621	-1209.49		0.47723	0	1590	0.0108866	-0.00359695	-2520.67	-1175.69		0.47723	0	1590	0.0231291	-0.00184061
0.445643	0	1598	0.0212139	-0.00373901	2451.51	6137.24						0.445643	0	1598	1.35145	-0.466385	-94861.2	-166343		0.445643	0	1598	0.000733687	0.00019063	-529.768	103.994			0.445643	0	1598	0.00290366	6.46308e-05	-2001.87	609.103		0.445643	0	1598	0.0077244	0.00136517	-2037.75	6006.58		0.445643	0	1598	0.0607545	-0.00982008
0.397268	0	1609	0.0116883	0.00111791	-662.208	2326.76						0.397268	0	1609	0.0180425	0.00117369	593.997	252.1		0.397268	0	1609	0.00181121	3.70298e-05	42.6772	152.038			0.397268	0	1609	0.00198718	0.000136819	-538.387	-389.871		0.397268	0	1609	0.00354458	-9.51669e-05	-1109.67	77.4218		0.397268	0	1609	0.00436653	0.00031352
0.308514	0	1610	0.113556	-0.000218333	1912.02	-1399.53						0.308514	0	1610	0.757635	0.838496	-12122.6	126351		0.308514	0	1610	0.00182268	-0.000500495	237.62	124.823			0.308514	0	1610	0.00753492	0.000914662	231.933	14.0257		0.308514	0	1610	0.00757318	0.00579331	755.213	-457.477		0.308514	0	1610	0.00952079	-0.0150753
0.320214	0	1615	0.00687831	0.00209575	480.762	-482.101						0.320214	0	1615	0.184814	-0.0764702	0	-5846.18		0.320214	0	1615	0.000562822	-0.00022471	20.8616	-20.1492			0.320214	0	1615	0.000831415	-0.000249818	346.978	200.453		0.320214	0	1615	0.00792562	0.00193313	351.039	-979.501		0.320214	0	1615	0.00239566	0.0022905
0.410713	0	1619	0.0817034	0.000120571	811.554	-1742.82						0.410713	0	1619	1.25285	1.13114	-181456	205989		0.410713	0	1619	0.00187754	-0.000324674	127.715	222.722			0.410713	0	1619	0.00872469	-0.000880406	-262.506	231.951		0.410713	0	1619	0.011256	5.90144e-05	-1878.66	-1060.03		0.410713	0	1619	0.0072582	-0.00189186
0.413249	0	1622	0.0735489	0.000996195	-651.897	-829.815						0.413249	0	1622	0.0745754	0.0356787	42782.9	-46038		0.413249	0	1622	0.00112479	-0.000103948	-27.0987	397.308			0.413249	0	1622	0.000671376	-0.000282967	262.204	670.345		0.413249	0	1622	0.0133726	0.00117844	-540.9	1557.49		0.413249	0	1622	0.00199825	0.000260522
0.335067	0	1629	0.083589	0.00094843	138.584	-982.102						0.335067	0	1629	0.112727	-3.33277	-23458.8	-196044		0.335067	0	1629	0.00289184	4.83208e-05	127.792	647.392			0.335067	0	1629	0.00712449	-0.000125988	-184.15	-260.753		0.335067	0	1629	0.0181384	0.000908328	477.128	-492.098		0.335067	0	1629	0.0130102	-0.00115727
0.413707	0	1641	0.0369103	-4.45063e-06	614.197	-2506.68						0.413707	0	1641	0.0163639	0.0123688	-50162.8	75440.1		0.413707	0	1641	0.000479238	8.01763e-05	-74.6286	-189.825			0.413707	0	1641	0.00124196	0.000276273	-213.608	-322.41		0.413707	0	1641	0.00126035	-4.05519e-05	349.365	-896.453		0.413707	0	1641	0.0115248	0.00877646
0.320519	0	1644	0.0203722	0.0035984	281.035	-3782.83						0.320519	0	1644	2.94225	2.07883	-19416.9	-90746.4		0.320519	0	1644	0.00382183	-0.000249134	-72.162	255.274			0.320519	0	1644	0.00797169	0.000266417	-1327.08	-1022.31		0.320519	0	1644	0.0100674	-0.0484908	9577.88	20570		0.320519	0	1644	0.0594212	0.00441588
0.433756	0	1645	0.0018127	-0.000168556	-383.185	1016.85						0.433756	0	1645	0.0399138	-0.0158708	555.026	812.534		0.433756	0	1645	0.000148445	6.31478e-05	-18.7457	2.88515			0.433756	0	1645	3.85314e-05	-1.65668e-05	73.7004	48.276		0.433756	0	1645	0.0016717	0.000640031	-41.263	-77.688		0.433756	0	1645	0.000543174	-0.000253907
0.379337	0	1657	0.0851961	-0.000972057	129.198	-2181.55						0.379337	0	1657	0.0927235	0.0541318	-47052.7	-33485.5		0.379337	0	1657	0.00165228	-0.000546625	-156.99	111.323			0.379337	0	1657	0.00117783	-0.000811081	356.26	740.611		0.379337	0	1657	0.00470178	0.000602869	53.6276	-1701.34		0.379337	0	1657	0.0204801	0.0160572
0.41981	0	1658	0.1251	0.00179692	-194.953	-8613.3						0.41981	0	1658	0.783426	-2.34637	72759.5	-8145.76		0.41981	0	1658	0.00123482	9.89237e-06	-2.23577	246.326			0.41981	0	1658	0.00621509	-0.000321731	-538.71	516.5		0.41981	0	1658	0.00568088	-0.000568153	1046.62	192.917		0.41981	0	1658	0.0245254	-0.00507947
0.365009	0	1671	0.0137055	0.00112609	281.878	-2326.13						0.365009	0	1671	0.731166	0.845158	-67118.7	-54394		0.365009	0	1671	0.00607945	0.000812092	-726.395	-1021.64			0.365009	0	1671	1.87714	3.34748	0.122869	-7596.13		0.365009	0	1671	2.80219	0.579717	0	-7596.21		0.365009	0	1671	1.44274	1.29888
0.325664	0	1675	0.102757	-0.00284233	-156.734	-86.2831						0.325664	0	1675	0.199801	0.273261	1978.01	-7708.52		0.325664	0	1675	0.00204995	0.000288854	230.384	-250.547			0.325664	0	1675	0.00385837	-0.000523659	-353.695	-219.411		0.325664	0	1675	0.0127985	0.0165563	2220.7	-9741.79		0.325664	0	1675	0.0106752	0.00130611
0.302332	0	1689	0.0603152	0.00208655	-444.951	3952.98						0.302332	0	1689	0.142285	-0.0156756	-76779.8	17468.4		0.302332	0	1689	0.0014579	-0.000448795	35.2614	-54.9317			0.302332	0	1689	0.00703355	-0.000258944	73.6516	-115.504		0.302332	0	1689	0.00402873	0.000971794	-408.793	-651.715		0.302332	0	1689	0.0146023	0.00240786
0.362191	0	1694	0.010691	-0.00153112	-378.878	706.811						0.362191	0	1694	0.0319533	0.00671556	24052.4	17841.7		0.362191	0	1694	0.000273539	1.39837e-05	-30.0565	35.225			0.362191	0	1694	0.000446226	3.56899e-05	140.164	-66.5071		0.362191	0	1694	0.000324602	-0.000317888	308.017	414.717		0.362191	0	1694	0.00182716	-0.000182208
0.459343	0	1708	0.0278725	-0.00715162	-111.963	286.358						0.459343	0	1708	0.0290645	0.0174421	-18575.5	7700.53		0.459343	0	1708	0.000384568	1.10326e-05	88.2018	-133.111			0.459343	0	1708	0.00160789	0.000120132	457.342	-453.984		0.459343	0	1708	0.00328167	-0.000430689	1000.77	-1349.94		0.459343	0	1708	0.00385976	0.000533653
0.438445	0	1710	0.0242178	0.000898346	685.751	-515.329						0.438445	0	1710	0.0721458	0.00330918	92788.5	9809.53		0.438445	0	1710	0.000638485	6.75329e-05	9.22391	-36.9902			0.438445	0	1710	0.00129235	-0.000126269	-1105.56	677.633		0.438445	0	1710	0.00718628	-0.000354803	352.217	-2779.58		0.438445	0	1710	0.00666537	0.000131853
0.494289	0	1714	0.0192203	0.000691801	-1733.59	-2848.48						0.494289	0	1714	1.90833	-1.36089	-437630	-57696.9		0.494289	0	1714	0.00211834	0.000142623	-121.998	-183.409			0.494289	0	1714	0.0384234	0.0045725	-24535.8	22146.7		0.494289	0	1714	0.00682292	0.00950094	-22569.7	-7917.88		0.494289	0	1714	0.0599585	0.0977066
0.304098	0	1723	0.0189009	0.00138228	-580.189	2967.08						0.304098	0	1723	0.0327171	0.0106509	8562.74	19195.5		0.304098	0	1723	0.00240235	0.0438829	-247.876	6205.22			0.304098	0	1723	0.0016993	0.0323216	334.568	-2214.22		0.304098	0	1723	0.00309778	-0.0351909	-133.163	3194.28		0.304098	0	1723	0.00385094	0.00144609
0.457754	0	1724	0.0124999	-0.000243662	-42.9855	-1028.31						0.457754	0	1724	0.0337338	-0.00450008	-29371	17830.7		0.457754	0	1724	0.000355144	-5.1962e-05	-77.249	46.5286			0.457754	0	1724	0.000829485	5.51608e-05	305.657	145.819		0.457754	0	1724	0.00296441	-0.000216327	527.676	342.345		0.457754	0	1724	0.0110524	0.0030972
0.329284	0	1748	0.0384898	-0.00328573	736.546	515.537						0.329284	0	1748	0.079828	0.0336977	-50496.9	-11078.3		0.329284	0	1748	0.000449955	0.00112143	-482.794	-406.983			0.329284	0	1748	0.00302399	-0.000391862	-435.802	-54.6755		0.329284	0	1748	0.00244372	-0.000381137	510.522	202.758		0.329284	0	1748	0.00291393	-0.00178705
0.372736	0	1755	0.0133906	0.0014507	1598.05	734.483						0.372736	0	1755	0.877949	-1.23897	-71989.2	-57190		0.372736	0	1755	0.000154048	0.000119607	-63.5272	-69.1021			0.372736	0	1755	0.0007805	0.000266198	706.002	-445.207		0.372736	0	1755	0.00308477	0.00233447	2493.58	-4275.9		0.372736	0	1755	0.0188812	0.00137494
0.470718	0	1761	0.0415913	0.00124339	-1937.95	8003.23						0.470718	0	1761	0.0447157	-0.0201811	5958.15	-36304.4		0.470718	0	1761	0.00111132	1.82064e-05	106.411	-54.032			0.470718	0	1761	0.00548376	0.000213511	26.168	132.718		0.470718	0	1761	0.00232981	-0.000280051	66.336	-59.3814		0.470718	0	1761	0.00429544	0.000180223
0.353753	0	1773	0.116952	-0.00316817	1225.48	307.528						0.353753	0	1773	2.62011	4.82648	408340	-306212		0.353753	0	1773	0.000795811	0.000800561	142.158	-348.797			0.353753	0	1773	0.00493885	-0.000120072	-557.316	42.0565		0.353753	0	1773	0.0186488	0.00615227	193.385	1798.69		0.353753	0	1773	0.0113176	0.00188815
0.30844	0	1779	0.026144	0.00296356	874.032	-792.512						0.30844	0	1779	0.0503982	0.00481608	255.417	-27550		0.30844	0	1779	0.00254366	2.95843e-06	-66.1574	-44.6467			0.30844	0	1779	0.00181352	-0.000148243	-67.1107	14.4942		0.30844	0	1779	0.00416876	0.000815004	409.658	-238.914		0.30844	0	1779	0.00358534	-0.000398377
0.403007	0	1780	0.111064	-0.00112814	1662.49	3.64093						0.403007	0	1780	0.347382	-1.1802	332410	42354.6		0.403007	0	1780	0.00150353	0.000263488	-354.638	107.579			0.403007	0	1780	0.0155814	4.96536e-05	2202.89	-279.361		0.403007	0	1780	0.00310117	-0.00096135	-143.203	1011.67		0.403007	0	1780	0.0126882	-0.000316096
0.382247	0	1786	0.00718911	0.0030455	558	-43.1052						0.382247	0	1786	0.0370319	-0.0274664	-12892.2	8943.49		0.382247	0	1786	0.000274962	-6.67661e-05	-99.7342	-4.0687			0.382247	0	1786	0.000123311	9.10779e-05	-74.8299	51.2056		0.382247	0	1786	0.000447899	0.000887932	-240.585	694.355		0.382247	0	1786	0.00286831	0.00193049
0.469879	0	1805	0.0687859	-0.00123461	609.499	-2561.08						0.469879	0	1805	0.104941	-0.102057	-54764.4	3782.76		0.469879	0	1805	0.00114752	3.16015e-05	-391.267	-126.318			0.469879	0	1805	0.00277373	1.74169e-05	200.664	555.936		0.469879	0	1805	0.0093192	-0.000768085	-92.1889	-463.109		0.469879	0	1805	0.0079025	0.000787051
0.370826	0	1810	0.00154776	-0.000575175	147.998	-158.97						0.370826	0	1810	3.6679	8.86899	0	-7840.27		0.370826	0	1810	0.000404282	0.000305624	95.399	-37.2069			0.370826	0	1810	0.00133802	0.000823137	406.029	-264.477		0.370826	0	1810	0.00592326	-0.0065209	-13508.2	7143.37		0.370826	0	1810	0.0126598	0.000652008
0.420363	0	1821	0.0934109	-0.00321642	1018.75	2322.97						0.420363	0	1821	0.95204	2.55784	0	-10074.9		0.420363	0	1821	0.00173559	-0.000217587	-140.746	-19.0112			0.420363	0	1821	0.00425193	-0.00030858	556.775	-218.967		0.420363	0	1821	0.00824421	0.00176065	-781.983	3920.98		0.420363	0	1821	0.0274479	-0.000581272
0.363924	0	1836	0.0265539	4.88166e-05	-151.249	106.961						0.363924	0	1836	4.35189	0.16244	157815	99996.2		0.363924	0	1836	0.00902487	-0.00823946	-6030.93	7655.05			0.363924	0	1836	0.16925	0.218876	-0.914887	-7550.78		0.363924	0	1836	1.92737	-0.571732	0	-7551.14		0.363924	0	1836	2.22156	-1.55211
0.374016	0	1858	0.0239609	0.000485807	455.701	-3098.94						0.374016	0	1858	2.19695	-0.692289	-28859.6	79069.8		0.374016	0	1858	0.00188784	-0.000107852	871.923	-389.776			0.374016	0	1858	0.0111908	-0.00471983	57.194	5571.98		0.374016	0	1858	0.027889	0.000290391	9203.21	32264.1		0.374016	0	1858	0.039978	-0.0599317
0.487959	0	1868	0.017315	0.000243082	-1306.01	5549.97						0.487959	0	1868	0.0293629	-0.00273325	38702	23645.2		0.487959	0	1868	0.000709126	1.37581e-05	-208.835	80.534			0.487959	0	1868	0.000202326	0.000131558	67.8783	436.388		0.487959	0	1868	0.00516909	0.000674241	-654.577	18.9691		0.487959	0	1868	0.00099439	-7.31296e-06
0.428389	0	1872	0.0794333	0.00117782	2264.94	-3230.56						0.428389	0	1872	0.233652	-0.0128172	-77919.2	145278		0.428389	0	1872	0.00140392	0.000140637	-116.062	-428.825			0.428389	0	1872	0.00498416	0.000171244	-101.147	-281.92		0.428389	0	1872	0.0184311	-0.000241151	383.886	111.527		0.428389	0	1872	0.0100909	0.00085508
0.331029	0	1873	0.0104554	0.000954661	227.41	11.1943						0.331029	0	1873	0.0411466	0.0241258	13799	-28898		0.331029	0	1873	0.000269672	6.88236e-06	59.3101	21.0145			0.331029	0	1873	0.00170709	-0.000482184	28.3481	-129.394		0.331029	0	1873	0.00368334	-2.74568e-05	247.168	189.376		0.331029	0	1873	0.000562949	-0.000636636
0.390037	0	1874	0.00702236	0.00256992	-846.597	918.309						0.390037	0	1874	0.020802	0.0064239	-484.056	-3874.78		0.390037	0	1874	0.000301247	4.26812e-05	-71.4967	8.37671			0.390037	0	1874	0.00018201	-6.07915e-05	26.9702	128.694		0.390037	0	1874	0.000228965	0.000200714	-96.3435	104.158		0.390037	0	1874	0.000620139	1.748e-05
0.358306	0	1880	0.00713187	-0.000199659	936.227	541.647						0.358306	0	1880	5.7459	-4.9465	0	-7319.8		0.358306	0	1880	0.000561532	-0.000177087	273.649	326.074			0.358306	0	1880	0.0176802	0.000120361	16955	-3336.39		0.358306	0	1880	0.0204193	-0.0027953	-1537.39	24990.7		0.358306	0	1880	0.0154659	0.00671249
0.441835	0	1882	0.0118103	0.000136173	257.756	7649.85						0.441835	0	1882	0.0413882	-0.00994896	-6613.07	-23705.7		0.441835	0	1882	0.00111236	5.09637e-05	-19.5777	-15.3839			0.441835	0	1882	0.000193037	2.17498e-05	342.333	51.5148		0.441835	0	1882	0.0077398	-0.000297502	1504.32	664.005		0.441835	0	1882	0.00337329	0.00013599
0.463208	0	1883	0.00455951	0.0006247	-2982.09	8098.98						0.463208	0	1883	0.00411889	0.00131942	2822.34	-2857.85		0.463208	0	1883	0.000339364	0.000147721	-148.309	-57.1533			0.463208	0	1883	0.00102315	9.89546e-05	453.577	-225.326		0.463208	0	1883	0.00404653	0.000585213	-331.888	-1100.55		0.463208	0	1883	0.00361465	0.000121115
0.336976	0	1884	0.0145653	0.00191395	76.3369	-1890.84						0.336976	0	1884	2.0984	-1.39018	186274	-240820		0.336976	0	1884	0.00641896	1.96814e-05	-399.675	184.121			0.336976	0	1884	0.761598	-0.342756	0.150047	-6475.29		0.336976	0	1884	3.93352	-2.22842	30105	-172492		0.336976	0	1884	0.411944	-1.95237
0.490156	0	1885	0.106351	0.00129483	-870.946	149.407						0.490156	0	1885	0.721385	0.790506	6339.85	67995.9		0.490156	0	1885	0.00136163	-0.000245284	-67.3319	727.582			0.490156	0	1885	0.00694619	0.000802475	1009.37	-128.79		0.490156	0	1885	0.0178087	-0.000353782	815.22	-3113.45		0.490156	0	1885	0.0221241	0.000366224
0.317663	0	1906	0.0164827	6.78392e-05	75.8963	96.7912						0.317663	0	1906	0.0564729	0.00701199	-3930.21	-29352.2		0.317663	0	1906	0.000159357	1.54581e-05	-2.66843	10.8771			0.317663	0	1906	0.00122363	-0.000162854	-99.159	-54.9632		0.317663	0	1906	0.00391529	-0.000840669	-206.349	-692.157		0.317663	0	1906	0.0104689	-0.00175444
0.49358	0	1933	0.0145893	0.000889933	3090.46	1511.86						0.49358	0	1933	1.14158	-1.10973	45282	152630		0.49358	0	1933	0.000228317	8.13707e-05	-135.748	-158.661			0.49358	0	1933	0.00081894	0.000271325	1148.15	-777.177		0.49358	0	1933	0.00529426	0.0050845	4789.59	-8327.48		0.49358	0	1933	0.0160015	-0.00363563
0.309393	0	1948	0.0193816	0.00439556	-1695.41	3414.53						0.309393	0	1948	0.0105344	0.000744516	345.941	1068.31		0.309393	0	1948	0.00190696	2.09257e-05	-69.1782	-30.2948			0.309393	0	1948	0.00208092	-0.000115936	-510.272	-119.372		0.309393	0	1948	0.00122347	0.000295656	-771.146	146.308		0.309393	0	1948	0.00343533	-0.000102206
0.320254	0	1956	0.000343514	8.80398e-05	146.087	92.0933						0.320254	0	1956	0.000983125	-0.00119	212.655	169.091		0.320254	0	1956	5.56505e-05	-7.13015e-05	-22.0814	-15.2261			0.320254	0	1956	0.000160389	-0.000173936	29.8666	23.5229		0.320254	0	1956	4.94466e-05	4.03576e-05	45.6358	23.884		0.320254	0	1956	5.59487e-05	5.33074e-05
0.326473	0	1960	0.0594952	-0.00222361	298.129	-1260.93						0.326473	0	1960	0.0326924	0.00719096	6136.39	-33590.5		0.326473	0	1960	0.00163372	0.00100629	-1248.02	457.153			0.326473	0	1960	0.000966875	-0.0019054	1022	-55.949		0.326473	0	1960	0.00312123	0.0158598	-4668.76	-627.402		0.326473	0	1960	0.00766548	0.00274813
0.349145	0	1980	0.0104245	0.00422081	53.862	-469.65						0.349145	0	1980	0.0373489	-0.031237	-22336.3	4259.62		0.349145	0	1980	0.000360675	-8.65573e-05	-37.7062	20.2304			0.349145	0	1980	0.000731632	-0.000114068	166.235	82.9261		0.349145	0	1980	0.00207617	0.000767624	290.024	218.874		0.349145	0	1980	0.00975568	0.00171931
0.367322	0	1981	0.0926358	0.00116263	138.846	-770.166						0.367322	0	1981	1.45221	0.810251	85300.9	-138982		0.367322	0	1981	0.000809815	-0.000492359	-219.853	517.551			0.367322	0	1981	0.00928086	0.00135132	1180.08	65.054		0.367322	0	1981	0.0154715	0.00172576	-2266.62	-39.8115		0.367322	0	1981	0.0111247	-0.00306031
0.302234	0	2010	0.0181436	0.000976423	-1319.66	1028.71						0.302234	0	2010	0.0185863	-0.00138786	1064.32	-3974.09		0.302234	0	2010	0.000750006	-6.39546e-05	53.4106	56.1868			0.302234	0	2010	0.00229934	0.000179987	104.691	-227.139		0.302234	0	2010	0.00323984	2.12572e-05	100.062	322.103		0.302234	0	2010	0.00301496	0.000201531
0.420035	0	2017	0.0525545	0.000181718	561.831	296.7						0.420035	0	2017	0.170415	-0.0240987	-109008	-7691.01		0.420035	0	2017	0.00201858	-9.711e-05	-101.998	-23.3105			0.420035	0	2017	0.00489535	0.000258875	-133.223	-231.988		0.420035	0	2017	0.0150148	-0.00141091	-1877.22	-2996.44		0.420035	0	2017	0.0116025	0.000642628
0.412143	0	2027	0.104605	0.00145322	348.214	-8127.85						0.412143	0	2027	1.4053	2.15917	373921	332290		0.412143	0	2027	0.00382795	-0.000194062	-284.134	-10.8991			0.412143	0	2027	0.00272533	-0.00106651	-561.656	201.275		0.412143	0	2027	0.00967081	-0.00212837	-3653.69	-4085.97		0.412143	0	2027	0.026379	-0.000746474
0.408294	0	2030	0.0250342	0.00327023	-265.769	480.826						0.408294	0	2030	1.61822	0.87756	118528	77915.5		0.408294	0	2030	0.010932	0.0368611	-2611.1	-8036.34			0.408294	0	2030	4.10529	7.70001	0	-9504.68		0.408294	0	2030	5.65329	-1.7452	-36455.1	156442		0.408294	0	2030	3.91347	-3.95348
0.308869	0	2035	0.098343	-0.0019937	-353.667	-12.3194						0.308869	0	2035	1.01131	-2.49026	0	-5439.24		0.308869	0	2035	0.00193711	0.000246819	212.111	-175.354			0.308869	0	2035	0.00376821	-0.000306706	-219.305	-249.451		0.308869	0	2035	0.0137829	0.00198998	-2530.57	6515.05		0.308869	0	2035	0.00989354	-0.000107025
0.443443	0	2038	0.042108	0.00148528	-1067.09	8278.77						0.443443	0	2038	0.0981367	-0.0741756	-110694	464.625		0.443443	0	2038	0.000383632	-5.39191e-05	-25.9838	31.5573			0.443443	0	2038	0.0043985	-0.000151276	534.493	-306.856		0.443443	0	2038	0.0031653	0.000230776	1121.91	59.653		0.443443	0	2038	0.0135918	-0.000251887
0.360159	0	2042	0.00980998	0.00146432	-1261.31	1077.14						0.360159	0	2042	0.0093395	0.000130867	-1467.61	-3037.51		0.360159	0	2042	0.000361771	6.32667e-05	53.196	31.817			0.360159	0	2042	0.000479927	6.38978e-05	120.451	-234.108		0.360159	0	2042	0.00147791	0.000255282	423.117	160.871		0.360159	0	2042	0.00226423	-0.000117909
0.44168	0	2043	0.0946965	-0.00187238	-433.248	4122.52						0.44168	0	2043	0.384921	-0.399851	11689.8	20200.2		0.44168	0	2043	0.00118308	4.57887e-05	-165.738	-182.045			0.44168	0	2043	0.00685678	-0.000381547	213.312	1188.19		0.44168	0	2043	0.00621178	0.000666485	-1457.88	-1662.67		0.44168	0	2043	0.0138335	-0.00141012
0.46322	0	2046	0.0848328	0.000573839	325.094	688.227						0.46322	0	2046	0.0554834	-0.014839	104493	781.925		0.46322	0	2046	0.000476706	-8.59594e-05	-78.5097	-243.252			0.46322	0	2046	0.00267633	0.000139486	287.743	36.215		0.46322	0	2046	0.00457822	-0.00045531	710.377	-3727.4		0.46322	0	2046	0.00538262	0.000217488
0.467605	0	2055	0.0382731	0.00090222	719.276	1381.38						0.467605	0	2055	0.0886156	-0.00209937	-21101	-20914		0.467605	0	2055	0.00140765	-0.000366408	785.372	-426.022			0.467605	0	2055	0.00265242	0.000140709	-399.701	91.3287		0.467605	0	2055	0.00328325	0.000474809	-185.321	435.449		0.467605	0	2055	0.00310899	6.50046e-05
0.323999	0	2057	0.00563806	0.000991214	-118.405	2333.41						0.323999	0	2057	0.015948	0.00342383	2406.27	-2949.63		0.323999	0	2057	0.000360113	-2.56174e-05	7.80261	29.3737			0.323999	0	2057	0.000945911	7.03038e-05	59.1978	67.1411		0.323999	0	2057	0.0011759	0.000209444	-533.374	-186.091		0.323999	0	2057	0.000758157	-0.000143851
0.406372	0	2070	0.0407316	-0.00070051	-22.4115	401.498						0.406372	0	2070	0.0396676	0.00580547	-16674	-16413		0.406372	0	2070	0.00180685	-9.75511e-05	5.66176	61.8588			0.406372	0	2070	0.00379848	-3.34987e-05	-172.228	-492.348		0.406372	0	2070	0.0121975	0.000293647	661.668	-1317.89		0.406372	0	2070	0.00838845	0.000182497
0.329618	0	2072	0.017847	0.00151021	-171.148	-1276.01						0.329618	0	2072	2.03141	-3.442	14246.2	-10015.4		0.329618	0	2072	0.00484999	-0.000317787	38.3292	191.758			0.329618	0	2072	0.341439	-0.197193	120948	-49244.9		0.329618	0	2072	2.37526	-0.140529	0	-6194.57		0.329618	0	2072	1.57624	1.9113
0.474748	0	2079	0.130011	0.00169389	-263.556	-10349.5						0.474748	0	2079	0.954216	0.28031	0	-12850.4		0.474748	0	2079	0.00108249	0.000142855	73.6375	389.243			0.474748	0	2079	0.00589835	0.000209649	-1258.84	-412.468		0.474748	0	2079	0.0030642	0.00119625	-715.478	274.423		0.474748	0	2079	0.0228551	-0.00144185
0.400623	0	2083	0.00182324	-0.00195665	1052.96	2911.28						0.400623	0	2083	4.02903	-4.17535	0	-9150.85		0.400623	0	2083	0.00412022	-0.000330653	-17.8176	625.004			0.400623	0	2083	0.0209487	-0.00274009	-15707.8	-685.285		0.400623	0	2083	0.0285856	-0.00138579	44940.8	3953.85		0.400623	0	2083	0.0341715	0.0129126
0.310848	0	2084	0.0157475	0.00128299	93.0004	50.1108						0.310848	0	2084	0.0957244	-0.0259186	7777.46	-26574.6		0.310848	0	2084	0.000287914	2.627e-05	-29.2269	31.4637			0.310848	0	2084	0.00113177	7.00365e-05	154.682	-70.581		0.310848	0	2084	0.00430014	0.000320081	-442.265	-877.65		0.310848	0	2084	0.000893858	-0.000101224
0.433692	0	2085	0.143647	-0.00378619	-984.551	-10423						0.433692	0	2085	0.805535	0.879144	0	-10723.9		0.433692	0	2085	0.000647384	0.000283443	382.702	-399.97			0.433692	0	2085	0.00631738	0.000823121	378.802	121.486		0.433692	0	2085	0.00547077	-0.00124737	-3495.04	1341.61		0.433692	0	2085	0.0116732	0.00175607
0.471415	0	2090	0.0621216	-0.00101373	-968.836	-775.998						0.471415	0	2090	0.123528	-0.058206	11602.5	3275.51		0.471415	0	2090	0.00095033	0.00045466	-356.245	132.418			0.471415	0	2090	0.00177546	-0.000209559	-326.522	-70.7971		0.471415	0	2090	0.0112381	-0.000596186	6362.02	-2996.98		0.471415	0	2090	0.00949476	-0.00178481
0.328124	0	2101	0.0603941	-0.00348247	-1909.56	-3012.61						0.328124	0	2101	0.11616	-0.0121705	-21166.8	19396.9		0.328124	0	2101	0.00119577	-0.000120079	257.938	-103.687			0.328124	0	2101	0.00257129	0.000155203	147.142	-352.884		0.328124	0	2101	0.0107268	-0.000190913	246.23	-454.568		0.328124	0	2101	0.00377346	0.005308
0.326854	0	2102	0.0351081	0.000731385	717.877	-105.279						0.326854	0	2102	0.0320068	0.0316742	-9826.39	24847.8		0.326854	0	2102	0.000529296	-9.46335e-05	60.1403	-213.067			0.326854	0	2102	0.001407	9.97535e-05	-20.7356	119.999		0.326854	0	2102	0.00638576	-3.18414e-05	651.845	-806.4		0.326854	0	2102	0.00319381	0.00154695
0.432042	0	2108	0.123687	-0.000642953	-4465.13	-7504.41						0.432042	0	2108	1.49643	-4.50442	247671	-108310		0.432042	0	2108	0.00212033	-9.12888e-05	-39.4274	-408.458			0.432042	0	2108	0.00163001	-0.000503164	1444.67	-978.243		0.432042	0	2108	0.0192451	-0.00174465	1853.58	-2608.22		0.432042	0	2108	0.0140951	-0.000311728
0.351985	0	2118	0.0159694	0.000351515	903.256	-522.509						0.351985	0	2118	1.93124	-2.39613	-69588.4	-121178		0.351985	0	2118	0.00221201	-0.000336173	48.1768	544.316			0.351985	0	2118	0.0654053	-0.026524	19306.1	3430.23		0.351985	0	2118	0.039583	0.0177425	-13115.7	-13750.1		0.351985	0	2118	0.0913091	-0.274622
0.447944	0	2129	0.0710905	-0.000201118	-1495.13	303.456						0.447944	0	2129	0.279262	0.377934	-159216	117184		0.447944	0	2129	0.00157825	-0.000315313	-206.148	395.102			0.447944	0	2129	0.00584138	0.000270748	529.993	-1143.87		0.447944	0	2129	0.00656555	-0.00152316	-1538.85	2723.61		0.447944	0	2129	0.00589636	-0.00260075
0.410652	0	2131	0.00234652	-0.000297981	322.082	-275.556						0.410652	0	2131	0.000769205	-0.00016537	-102.395	191.156		0.410652	0	2131	0.00035703	5.32656e-05	78.4727	34.0352			0.410652	0	2131	0.000341702	2.20602e-05	-77.6447	-113.745		0.410652	0	2131	0.00219769	-0.000381005	69.8853	106.644		0.410652	0	2131	0.00153929	0.000257356
0.385543	0	2144	0.0151748	0.00138162	-629.276	-144.53						0.385543	0	2144	0.0725362	0.00390337	-87.3501	40543.1		0.385543	0	2144	0.000155779	5.29225e-05	84.0499	-66.7752			0.385543	0	2144	0.00054515	-0.000164879	76.3352	136.66		0.385543	0	2144	0.00097134	-0.00041965	472.198	-38.5773		0.385543	0	2144	0.00264855	0.00028996
0.373926	0	2153	0.0420538	-0.00176843	89.9848	-229.417						0.373926	0	2153	0.0493948	-0.0142476	1010.33	-74103.1		0.373926	0	2153	0.000855608	0.000734366	43.7838	-143.52			0.373926	0	2153	0.00468489	7.10188e-05	-217.472	-153.023		0.373926	0	2153	0.0107796	0.00595542	2772.15	-866.46		0.373926	0	2153	0.0146841	-0.000156856
0.424308	0	2158	0.08399	0.00115778	587.679	-799.684						0.424308	0	2158	0.259682	-0.0341406	-73755.5	35702.3		0.424308	0	2158	0.00417646	-0.00010797	15.1098	-109.687			0.424308	0	2158	0.0044092	-0.000377334	704.59	50.6863		0.424308	0	2158	0.0173331	0.000314947	-733.624	633.141		0.424308	0	2158	0.00360274	-0.00100831
0.301495	0	2161	0.0149687	-0.00112267	245.604	3775.08						0.301495	0	2161	0.0835588	-0.151026	3584.44	35150.8		0.301495	0	2161	0.00161778	0.000150163	-8.5187	14.0788			0.301495	0	2161	0.000861228	-0.000252492	146.615	291.182		0.301495	0	2161	0.00963285	-0.000231958	957.103	227.38		0.301495	0	2161	0.00264124	-0.000324773
0.306047	0	2166	0.0639771	-0.00126772	-346.5	50.6569						0.306047	0	2166	0.129869	0.0531513	-61609.5	-11474.4		0.306047	0	2166	0.000750618	-1.13409e-05	151.363	-10.567			0.306047	0	2166	0.00189411	-0.00045917	-56.0291	-356.025		0.306047	0	2166	0.0185997	0.000849063	-1541.85	1587.92		0.306047	0	2166	0.00486645	0.000305697
0.394696	0	2173	0.0245143	0.00198166	-1656.18	4040.46						0.394696	0	2173	0.0125612	0.00151942	6414.03	-6140.87		0.394696	0	2173	0.00100794	7.02705e-05	84.3382	3.10626			0.394696	0	2173	0.00350611	-0.000337494	185.956	-548.746		0.394696	0	2173	0.00775685	0.000790779	-1480.78	-406.577		0.394696	0	2173	0.00545737	-4.63637e-05
0.454803	0	2185	0.00685244	-7.5646e-05	-547.574	5752.54						0.454803	0	2185	0.0129273	-0.002028	-8455.33	-3205.73		0.454803	0	2185	0.000583882	2.10641e-05	-19.6202	62.839			0.454803	0	2185	0.00142179	-3.04991e-05	87.853	181.391		0.454803	0	2185	0.0011294	4.84773e-05	-1181.71	-496.61		0.454803	0	2185	0.00165202	-0.000289243
0.445302	0	2186	0.0611482	-0.00149463	1826.88	-10451.3						0.445302	0	2186	3.07922	-2.11175	198810	-449112		0.445302	0	2186	0.000141275	0.000135233	-17.6182	-745.104			0.445302	0	2186	0.00223635	0.000253756	153.535	-547.326		0.445302	0	2186	0.0174926	-2.07856e-05	395.792	-514.465		0.445302	0	2186	0.0100575	0.00741341
0.305331	0	2188	0.0261853	-0.000506014	305.416	-275.232						0.305331	0	2188	0.0855454	-0.00993094	-4466.14	-4228		0.305331	0	2188	0.000785565	-3.19259e-05	132.32	5.94941			0.305331	0	2188	0.00383742	-1.01426e-05	-141.117	-321.295		0.305331	0	2188	0.00539835	-0.00149556	632.011	427.946		0.305331	0	2188	0.00693106	-0.00145611
0.405976	0	2189	0.0307509	-0.0012968	-587.136	-252.261						0.405976	0	2189	0.0312394	0.00615281	-32479.3	-17832.9		0.405976	0	2189	0.000232171	-2.8877e-05	-16.0735	-122.292			0.405976	0	2189	0.00100911	6.11174e-05	78.6511	216.713		0.405976	0	2189	0.00168283	-5.35472e-05	669.121	187.657		0.405976	0	2189	0.000445527	0.000392009
0.306824	0	2190	0.0162275	-0.000488047	609.662	-669.881						0.306824	0	2190	0.0771277	-0.0166202	-2270	-8012.19		0.306824	0	2190	0.000563026	-8.1777e-05	-23.1107	88.7613			0.306824	0	2190	0.000597557	-9.02394e-05	-89.2164	-40.8489		0.306824	0	2190	0.00138012	0.000465985	513.103	316.99		0.306824	0	2190	0.00200943	-0.0056214
0.405292	0	2198	0.00834239	0.000177134	-1261.62	29.7963						0.405292	0	2198	1.60031	-2.38766	220812	240327		0.405292	0	2198	0.00146064	0.000264081	-128.385	87.0943			0.405292	0	2198	0.00139621	0.00122663	-3338.99	919.601		0.405292	0	2198	0.0190975	0.00313529	7128.83	8563.55		0.405292	0	2198	0.0614227	-0.00686591
0.428921	0	2201	0.106303	-0.00225153	-1740.65	-357.854						0.428921	0	2201	0.823982	-0.78622	0	-10489.3		0.428921	0	2201	0.00304353	0.000230701	110.946	-6.51226			0.428921	0	2201	0.00518583	-0.00127276	729.129	550.581		0.428921	0	2201	0.019683	-0.000215092	1301.29	427.296		0.428921	0	2201	0.0046083	0.00183402
0.367162	0	2215	0.12436	0.00133605	-145.068	-6778.76						0.367162	0	2215	3.436	-1.1328	0	-7686.08		0.367162	0	2215	0.00124274	3.39273e-05	1.24568	165.985			0.367162	0	2215	0.00616407	-0.000145268	-509.485	400.188		0.367162	0	2215	0.00503049	0.000359489	-1889.25	1953.75		0.367162	0	2215	0.0279284	-0.00394595
0.344932	0	2218	0.0507092	0.00133468	804.286	-1645.94						0.344932	0	2218	0.101096	0.0111369	27975	-39807.5		0.344932	0	2218	0.000915515	0.000712887	64.9687	-388.525			0.344932	0	2218	0.00379676	0.000724914	105.372	-737.846		0.344932	0	2218	0.00910519	0.00606219	-2152.68	-2779.21		0.344932	0	2218	0.00439707	0.0141066
0.479621	0	2224	0.0102126	0.00128488	147.536	-149.872						0.479621	0	2224	0.0675074	-0.017219	451.888	-40822.9		0.479621	0	2224	0.000259976	-4.77014e-05	144.077	-17.4552			0.479621	0	2224	0.00169408	-2.08043e-05	-239.84	-117.283		0.479621	0	2224	0.000306534	-0.000377341	-221.374	445.393		0.479621	0	2224	0.00264955	-6.72364e-05
0.438505	0	2238	0.0419795	-0.00861003	-1397.76	-10899						0.438505	0	2238	0.735992	1.12428	42789.5	26918.2		0.438505	0	2238	0.00127619	-0.000181705	169.895	373.722			0.438505	0	2238	0.00317534	-0.00038672	330.907	-15.3005		0.438505	0	2238	0.0108231	0.000656679	444.675	1505.15		0.438505	0	2238	0.00997214	-0.00117583
0.432017	0	2287	0.00513254	-0.00114007	130.363	18.342						0.432017	0	2287	0.00327888	-0.000572975	699.801	521.921		0.432017	0	2287	0.000133568	8.78765e-06	-3.73782	-40.6313			0.432017	0	2287	0.000412124	2.2717e-05	0.4565	-81.2042		0.432017	0	2287	0.0010752	0.000127796	-5.92205	97.851		0.432017	0	2287	0.000319308	8.52774e-06
0.381999	0	2295	0.0460649	-0.00592743	-1265.94	542.733						0.381999	0	2295	0.0586306	-0.02626	-117076	-133229		0.381999	0	2295	0.000618277	0.000654149	105.091	122.911			0.381999	0	2295	0.00369755	0.000176492	853.991	-1887.87		0.381999	0	2295	0.0143651	0.000397958	431.921	-1983.09		0.381999	0	2295	0.00136886	-0.00124962
0.322527	0	2298	0.0202004	-0.00115854	1033.56	703.278						0.322527	0	2298	0.629432	1.70806	141281	70521.7		0.322527	0	2298	0.00110395	0.000184369	-24.9706	-109.626			0.322527	0	2298	0.00594268	0.00134262	-615.998	-570.292		0.322527	0	2298	0.0154434	0.00182186	1174.99	-2172.23		0.322527	0	2298	0.0222258	0.000259167
0.445992	0	2308	0.0206967	0.00145913	-173.299	-1308.33						0.445992	0	2308	1.67933	0.795007	-260719	-382423		0.445992	0	2308	0.00428139	-0.000209034	233.272	146.161			0.445992	0	2308	0.155202	0.0259286	0.215771	-11339.6		0.445992	0	2308	2.65004	-0.47155	19810.1	37526.5		0.445992	0	2308	0.364448	0.209351
0.364451	0	2316	0.099697	0.00561499	-212.219	-6981.66						0.364451	0	2316	0.11588	0.0467748	-31555.2	-39628.4		0.364451	0	2316	0.00244072	-0.000180879	105.519	97.4676			0.364451	0	2316	0.00308585	0.000405136	271.445	-402.482		0.364451	0	2316	0.00429971	-0.000171935	482.511	514.768		0.364451	0	2316	0.00951158	-0.00398419
0.36918	0	2326	0.0273191	0.000310934	-29.5489	-536.965						0.36918	0	2326	0.0477777	-0.0011595	6614.76	-1151.14		0.36918	0	2326	0.000319934	1.83063e-05	-36.5863	-10.5383			0.36918	0	2326	0.000347889	2.25758e-05	192.911	-45.6131		0.36918	0	2326	0.0032901	0.00114548	407.75	1204.42		0.36918	0	2326	0.006975	0.00105862
0.384365	0	2344	0.0739609	0.000809109	-94.3932	-1814.78						0.384365	0	2344	0.308786	-0.565046	-140324	-71090.1		0.384365	0	2344	0.000420442	0.000337124	-284.314	211.389			0.384365	0	2344	0.002746	0.000679976	-95.5853	-1945.39		0.384365	0	2344	0.0103293	-0.00290666	-114.062	408.264		0.384365	0	2344	0.0113304	4.0586e-05
0.308029	0	2353	0.0977024	-0.0013177	90.037	-1068.68						0.308029	0	2353	1.10381	1.35126	-21352.4	-20992.1		0.308029	0	2353	0.00249085	0.000195474	115.218	41.8658			0.308029	0	2353	0.0122972	-8.57962e-05	-139.399	-205.318		0.308029	0	2353	0.023293	-0.000545778	-668.703	-415.383		0.308029	0	2353	0.00940816	-0.0005006
0.410034	0	2356	0.0634168	0.00284045	-476.445	6055.53						0.410034	0	2356	0.0603788	-0.00120353	19839.3	18457.2		0.410034	0	2356	0.00185315	0.0001373	-38.8285	-255.826			0.410034	0	2356	0.00633667	-9.16166e-05	-294.525	348.97		0.410034	0	2356	0.00331025	-7.22246e-05	-1074.18	-762.728		0.410034	0	2356	0.0138919	0.0016512
0.455736	0	2358	0.10427	0.000947518	-382.071	-9337.19						0.455736	0	2358	0.852466	-0.469659	18294.3	-2893.37		0.455736	0	2358	0.00165795	-0.000221108	-187.278	-305.595			0.455736	0	2358	0.00253868	-0.000668848	484.578	1024.34		0.455736	0	2358	0.00553584	0.00190656	3173.82	-2412.29		0.455736	0	2358	0.0272584	-0.000641709
0.488969	0	2360	0.0125128	0.000171356	973.959	3598.24						0.488969	0	2360	0.01475	0.000277338	-11398.3	-4929.27		0.488969	0	2360	0.000238611	-6.15269e-05	146.215	15.3754			0.488969	0	2360	0.00120301	0.000133422	154.109	-159.69		0.488969	0	2360	0.00124904	-0.000170694	726.323	887.314		0.488969	0	2360	0.00102868	0.000175295
0.433142	0	2368	0.0402792	-0.00136083	617.51	308.589						0.433142	0	2368	0.0743566	-0.0120669	10137.4	-31936.1		0.433142	0	2368	0.000695571	7.06345e-05	22.742	-259.673			0.433142	0	2368	0.00440185	-0.000120192	-32.3946	-282.875		0.433142	0	2368	0.00467576	-0.000788371	-708.02	-1755.3		0.433142	0	2368	0.00395109	-0.00110008
0.431416	0	2380	0.0444456	-0.00787331	-1927.07	-2746.95						0.431416	0	2380	1.96931	-2.49055	-75090.2	-325187		0.431416	0	2380	0.00351428	6.11251e-05	727.785	-177.845			0.431416	0	2380	0.00387994	-0.00019498	1854.8	-2054.07		0.431416	0	2380	0.0149897	-0.00315113	-1196	-5759.78		0.431416	0	2380	0.0302936	-0.00780077
0.343306	0	2381	0.00267734	-0.00127013	104.977	125.043						0.343306	0	2381	0.0108596	-0.0110925	-4046.96	2756.6		0.343306	0	2381	7.18246e-05	-7.1546e-05	-5.418	2.15125			0.343306	0	2381	0.000254162	-0.000266058	-12.0947	6.55434		0.343306	0	2381	0.000783679	0.000839492	55.0986	9.63062		0.343306	0	2381	0.000930498	-0.00106095
0.408954	0	2384	0.0294023	-0.00318971	504.711	3305.32						0.408954	0	2384	1.9064	1.18514	23712.3	-71844.6		0.408954	0	2384	0.00220928	-0.000152992	13.1651	202.308			0.408954	0	2384	0.0151837	0.000446377	78.5482	529.373		0.408954	0	2384	0.0232223	0.000210243	-4919.92	-1213.99		0.408954	0	2384	0.0244871	-0.0298392
0.48968	0	2390	0.0824754	-0.00183466	-5.76126	4024.56						0.48968	0	2390	0.139428	-1.43755	0	-13671.5		0.48968	0	2390	0.00147892	3.57722e-05	-15.6161	-328.891			0.48968	0	2390	0.00282829	-0.000890184	-403.914	443.029		0.48968	0	2390	0.00150908	0.00236828	3917.61	-7519.25		0.48968	0	2390	0.0145933	0.0025217
0.341982	0	2392	0.00147153	0.000216519	187.385	56.8708						0.341982	0	2392	0.000323805	0.000185722	210.73	-208.875		0.341982	0	2392	0.000334396	9.95162e-05	35.6979	22.8187			0.341982	0	2392	0.000233308	4.91559e-06	-46.9858	-46.0606		0.341982	0	2392	0.00191487	-0.000580333	55.2815	42.9801		0.341982	0	2392	0.00112226	6.57597e-05
0.408654	0	2394	0.0568853	-0.000750352	-563.17	-105.075						0.408654	0	2394	0.126687	-0.0145587	-65083.8	-33595.4		0.408654	0	2394	0.00116738	-9.9995e-06	173.943	-73.9375			0.408654	0	2394	0.00865707	0.000560779	-167.303	-622.523		0.408654	0	2394	0.0176005	-0.00115103	1033.04	-142.739		0.408654	0	2394	0.0115306	0.000150888
0.385598	0	2398	0.0518531	-0.0578906	-1015.04	276.628						0.385598	0	2398	0.0441879	-0.0471548	-31284.2	-32410.4		0.385598	0	2398	0.000782295	-0.000209762	-32.3966	-202.785			0.385598	0	2398	0.00403318	0.00140223	527.502	34.0332		0.385598	0	2398	0.00229972	-0.000824898	1347.55	784.98		0.385598	0	2398	0.00205647	0.00115255
0.443838	0	2399	0.021076	0.00488188	-101.966	-8090.54						0.443838	0	2399	0.125304	-0.0265314	-29482.3	96388.1		0.443838	0	2399	0.00208436	6.54097e-05	-157.801	-419.731			0.443838	0	2399	0.00480296	-0.000351649	358.091	279.657		0.443838	0	2399	0.00833395	0.000508795	467.342	758.575		0.443838	0	2399	0.0079713	0.00295642
0.402738	0	2402	0.0621999	0.0023721	-872.667	6637.74						0.402738	0	2402	0.176175	0.0625641	-13694.3	-22510		0.402738	0	2402	0.00175252	0.000481847	39.2281	-131.761			0.402738	0	2402	0.00666972	-0.000424315	-199.908	-206.852		0.402738	0	2402	0.00392997	-6.99925e-06	-1379.08	-657.056		0.402738	0	2402	0.014967	0.00055611
0.338362	0	2409	0.0944409	0.00190326	-164.239	-5813.14						0.338362	0	2409	0.107385	0.0565629	712.737	24777.4		0.338362	0	2409	0.00337492	0.000169668	51.3796	-123			0.338362	0	2409	0.00425949	-5.86289e-05	93.0421	60.4266		0.338362	0	2409	0.0018104	0.00236104	579.112	-199.654		0.338362	0	2409	0.0164702	0.00806729
0.483483	0	2410	0.0506721	-0.00229244	328.198	5592.19						0.483483	0	2410	0.402502	-0.113178	-112770	3564.31		0.483483	0	2410	0.0013127	-0.000173785	215.293	-69.0315			0.483483	0	2410	0.0082357	0.000357579	438.331	-1545.69		0.483483	0	2410	0.00212252	-0.000447739	-2671.94	4660.82		0.483483	0	2410	0.00747376	0.00327017
0.385377	0	2419	0.047936	0.0107831	-891.289	-5475.73						0.385377	0	2419	0.0193288	-0.00673646	21558	-13817.4		0.385377	0	2419	0.000662049	-0.000643014	186.149	-353.346			0.385377	0	2419	0.00254079	-0.000149467	260.436	181.794		0.385377	0	2419	0.00182463	0.000687574	100.037	575.526		0.385377	0	2419	0.00909675	-0.00171207
0.47393	0	2429	0.0635026	0.000772264	-1156.57	4187.49						0.47393	0	2429	1.56938	-3.6321	-93031.8	-65163.5		0.47393	0	2429	0.00152863	-1.11916e-05	166.037	-384.268			0.47393	0	2429	0.00812677	-0.00039724	1008.35	-69.3308		0.47393	0	2429	0.0102845	6.57112e-05	-6850.01	5354.23		0.47393	0	2429	0.0153883	0.00384247
0.330038	0	2433	0.0121501	0.00149102	-1108.54	2116.64						0.330038	0	2433	0.00232005	0.00089778	1521.52	89.2168		0.330038	0	2433	0.00118787	1.28414e-05	-34.4551	0.479852			0.330038	0	2433	0.00173934	2.64267e-05	-325.988	-95.346		0.330038	0	2433	0.00157427	3.22074e-05	-553.885	26.6079		0.330038	0	2433	0.00253157	0.000228829
0.459956	0	2434	0.0202396	0.00112319	-942.043	6303.36						0.459956	0	2434	0.0520449	0.0152166	-12941.1	-60568.5		0.459956	0	2434	0.000685019	-0.000131077	146.38	77.0012			0.459956	0	2434	0.00065943	0.000298129	-133.503	-301.927		0.459956	0	2434	0.00375738	-5.90646e-05	654.98	835.421		0.459956	0	2434	0.00281224	0.000518464
0.37959	0	2438	0.000245457	-0.000143406	121.628	-78.4583						0.37959	0	2438	0.00207477	-0.000507275	-528.572	-1006.28		0.37959	0	2438	9.93556e-05	4.07151e-05	-3.69105	-69.4599			0.37959	0	2438	0.000362803	-8.57953e-05	55.1681	10.6819		0.37959	0	2438	7.53517e-05	3.49408e-06	148.407	68.2021		0.37959	0	2438	0.000185339	9.62947e-05
0.488749	0	2439	0.0981892	2.71113e-05	1459.88	-1358.03						0.488749	0	2439	0.790093	-0.420797	-98882.8	132823		0.488749	0	2439	0.00262144	0.000538573	-213.969	-970.912			0.488749	0	2439	0.0101173	0.00131078	-1214.25	-357.344		0.488749	0	2439	0.0199717	-0.00149779	2692.81	436.828		0.488749	0	2439	0.0141938	0.000384423
0.495985	0	2442	0.0919542	9.80303e-05	570.243	-2671.71						0.495985	0	2442	1.44247	-0.704189	46340.8	37505.1		0.495985	0	2442	0.00182946	0.000476444	-484.868	96.3606			0.495985	0	2442	0.0105771	-0.00114292	-805.885	23.9601		0.495985	0	2442	0.0101907	0.00206337	-2604.69	-3561.99		0.495985	0	2442	0.0128176	-0.00194221
0.496477	0	2443	0.0475785	4.91624e-05	-546.709	-1204.59						0.496477	0	2443	0.0553122	0.00746132	3527.22	-21395.8		0.496477	0	2443	0.000230626	-4.19575e-05	-8.00198	-368.246			0.496477	0	2443	0.00170539	2.09098e-05	259.728	598.684		0.496477	0	2443	0.00322045	-0.000865441	-483.816	-2115.72		0.496477	0	2443	0.00195414	-0.000136326
0.371474	0	2461	0.0388638	-0.00179554	71.1597	-274.536						0.371474	0	2461	0.0589988	0.0103919	-11874.1	-16822.3		0.371474	0	2461	0.000615926	5.86848e-05	-96.3026	-8.29239			0.371474	0	2461	0.000647049	0.000282527	313.134	-126.905		0.371474	0	2461	0.0034542	0.00121811	248.236	445.288		0.371474	0	2461	0.0114112	0.000983369
0.369521	0	2465	0.0436	-0.004879	-1941.36	-2404.94						0.369521	0	2465	1.98835	0.301484	-229176	88472.4		0.369521	0	2465	0.00649813	-0.000672272	91.5368	15.0704			0.369521	0	2465	0.104227	-0.250981	-1537.62	1069.08		0.369521	0	2465	0.0567738	0.115092	0	-7785.17		0.369521	0	2465	0.55672	-0.315525
0.392616	0	2471	0.0164282	0.000250484	-829.706	6618.21						0.392616	0	2471	0.0142982	0.00281131	-13125.7	6947.51		0.392616	0	2471	0.00148544	-5.67262e-05	-176.281	55.5012			0.392616	0	2471	0.00358651	2.45114e-05	99.3824	-270.063		0.392616	0	2471	0.00408302	1.01389e-05	-142.722	-713.363		0.392616	0	2471	0.000436779	0.000101366
0.415377	0	2474	0.0365834	0.0022211	173.67	170.345						0.415377	0	2474	0.0569198	0.0169515	-24106.6	19697.1		0.415377	0	2474	0.000611162	-0.000118709	1.4415	30.8519			0.415377	0	2474	0.00162544	-0.000111375	-498.158	227.047		0.415377	0	2474	0.00754808	0.000111317	-193.846	-1107.79		0.415377	0	2474	0.0120277	-0.000315713
0.452749	0	2482	0.00361202	0.00015657	-786.398	2410.13						0.452749	0	2482	0.0698681	0.00226203	13475.9	16252		0.452749	0	2482	0.000389814	6.36822e-05	-52.4224	14.1486			0.452749	0	2482	0.000109575	-3.30898e-05	121.702	156.9		0.452749	0	2482	0.00401637	0.000517534	-75.5355	-157.377		0.452749	0	2482	0.0015311	-0.000338225
0.336371	0	2489	0.00677664	-0.0361198	2561.91	3581.36						0.336371	0	2489	0.0141543	-0.0420982	-896.323	19.9118		0.336371	0	2489	0.00016578	0.000245038	5.53798	-2.90582			0.336371	0	2489	0.000117921	0.000251727	-62.2785	-13.6		0.336371	0	2489	0.000216128	-0.000124798	-401.42	184.816		0.336371	0	2489	0.00297188	-0.00548295
0.47593	0	2497	0.060917	-0.000481464	-224.262	-1554.09						0.47593	0	2497	0.0397253	-0.00863121	18526.4	-59891.6		0.47593	0	2497	0.00134536	-0.000167868	97.4531	-126.784			0.47593	0	2497	0.00258026	-1.32035e-05	34.6251	665.377		0.47593	0	2497	0.00274054	-0.000755289	4487.06	1652.07		0.47593	0	2497	0.0167231	0.000308161
0.407127	0	2500	0.0148382	0.000280651	249.2	-1788.62						0.407127	0	2500	1.86655	4.88668	-59222.3	38069.2		0.407127	0	2500	0.00224793	-0.000265042	399.892	340.128			0.407127	0	2500	0.00702517	0.00130015	-372.887	-2003.99		0.407127	0	2500	0.0222562	0.00899319	-18626	-9419.32		0.407127	0	2500	0.0212797	-0.000770584
0.304014	0	2522	0.0302515	-0.00190369	565.612	884.137						0.304014	0	2522	2.92729	-1.66044	-123549	-33346.6		0.304014	0	2522	0.00183971	3.59643e-05	136.595	31.1098			0.304014	0	2522	0.0138811	-0.000287967	500.222	716.843		0.304014	0	2522	0.0101925	-0.0034237	-2622.69	3941.48		0.304014	0	2522	0.0348093	-0.0231672
0.46609	0	2523	0.0371141	-0.00313374	-628.865	371.068						0.46609	0	2523	0.0366934	-0.0504579	87083.1	-61854.1		0.46609	0	2523	0.00032902	-0.000188176	-32.4074	195.319			0.46609	0	2523	0.00288802	0.000453668	620.004	-1856.85		0.46609	0	2523	0.0107075	0.00140268	363.295	-1742.57		0.46609	0	2523	0.00526706	-0.00310781
0.351406	0	2529	0.0674066	-0.00390315	398.366	-922.019						0.351406	0	2529	0.0847467	-0.047115	-6011.78	-28527.1		0.351406	0	2529	0.00236614	-0.000372108	113.887	176.617			0.351406	0	2529	0.00645485	-0.000403675	-145.256	472.865		0.351406	0	2529	0.0187888	0.00243906	1180.23	-1646.89		0.351406	0	2529	0.0122067	0.00347265
0.490909	0	2542	0.0177553	0.00035721	-321.216	10605.5						0.490909	0	2542	0.0783583	0.114783	-99075.4	5040.83		0.490909	0	2542	0.0013031	3.08928e-05	129.179	-46.43			0.490909	0	2542	0.00144672	-0.000133194	64.532	-326.507		0.490909	0	2542	0.00598864	0.000276778	2402.17	-334.215		0.490909	0	2542	0.00924403	-0.000378539
0.453531	0	2543	0.0825711	0.00212297	2618.44	-7820.09						0.453531	0	2543	0.103028	1.35332	-71233.3	21909.4		0.453531	0	2543	0.0010355	0.000144857	-126.886	-470.748			0.453531	0	2543	0.0048724	0.000204675	38.9389	-324.474		0.453531	0	2543	0.0204869	-0.000382767	308.054	-303.371		0.453531	0	2543	0.0116601	-0.000107204
0.495639	0	2555	0.0077226	0.00130845	-740.683	-1557.55						0.495639	0	2555	0.009805	0.000839116	657.039	1511.22		0.495639	0	2555	0.000122394	-2.12453e-05	13.4932	-66.3935			0.495639	0	2555	0.00112129	-0.000159604	-20.3977	124.446		0.495639	0	2555	0.00274366	0.000153018	-30.3898	-99.4539		0.495639	0	2555	0.000668699	-0.000193251
0.430825	0	2566	0.0517582	0.00010179	186.029	379.807						0.430825	0	2566	0.0644474	-0.0279423	14164.7	-17026.6		0.430825	0	2566	0.00174493	-2.61761e-05	17.1226	14.2595			0.430825	0	2566	0.00381119	0.000199129	-273.119	262.551		0.430825	0	2566	0.00924881	-0.000269179	-378.757	-2104.13		0.430825	0	2566	0.0119881	0.000882156
0.438741	0	2583	0.0135636	-0.00457376	-787.929	-3188.39						0.438741	0	2583	0.0832924	0.0117605	1684.32	-3523.46		0.438741	0	2583	0.000744468	9.35806e-05	82.4852	-326.752			0.438741	0	2583	0.00322537	0.000105968	-406.961	-108.197		0.438741	0	2583	0.0121894	-0.000128194	-1587.56	351.272		0.438741	0	2583	0.0159726	-0.0074558
0.4905	0	2590	0.00592339	0.00209451	947.728	-5684.64						0.4905	0	2590	4.35125	-2.6813	-149494	-62186.4		0.4905	0	2590	0.00267671	0.000187678	-971.537	172.134			0.4905	0	2590	0.0108361	0.000778276	-1685.61	-1773.56		0.4905	0	2590	0.0168463	0.00170185	9672.86	16090.3		0.4905	0	2590	0.0612249	0.0138431
0.447028	0	2593	0.00977255	0.000542493	164.814	443.946						0.447028	0	2593	0.00152051	-0.000325527	1254.58	-363.948		0.447028	0	2593	0.000506902	3.62587e-05	-30.0648	-59.279			0.447028	0	2593	0.00102449	8.9011e-05	-152.278	-191.187		0.447028	0	2593	0.00232593	0.00032471	-192.603	88.4702		0.447028	0	2593	0.00136136	0.000158934
0.343302	0	2615	0.0594294	0.000557163	1077.8	-1796.52						0.343302	0	2615	0.0917788	-0.0152183	-14403.3	5795.28		0.343302	0	2615	0.00109666	-0.00715881	572.369	-854.028			0.343302	0	2615	0.00593582	0.00479297	-697.539	56.1773		0.343302	0	2615	0.013649	0.00100096	790.155	-1994.53		0.343302	0	2615	0.00754055	-0.0103792
0.39584	0	2622	0.0816876	-0.018824	1788.8	-5366.49						0.39584	0	2622	0.516116	0.00478725	-14009.1	-81254.1		0.39584	0	2622	0.00136101	7.78497e-05	-135.637	-110.634			0.39584	0	2622	0.00544957	5.3939e-05	-131.176	263.989		0.39584	0	2622	0.0215984	-0.000867891	-614.602	-318.9		0.39584	0	2622	0.0153122	0.00230687
0.44051	0	2624	0.0590275	0.00237945	1844.05	-10126.3						0.44051	0	2624	0.0858045	-1.30802	48552.6	-84066.9		0.44051	0	2624	0.000723262	0.000190806	86.9926	-572.124			0.44051	0	2624	0.00261753	3.08563e-05	269.279	-498.155		0.44051	0	2624	0.0159807	0.000195029	274.595	-751.282		0.44051	0	2624	0.00508025	-0.000111891
0.491593	0	2626	0.0364258	-0.000476734	844.166	5136.51						0.491593	0	2626	0.0525952	0.00527948	61039.9	-38725.3		0.491593	0	2626	0.000842468	8.75151e-05	3.66853	14.3325			0.491593	0	2626	0.00263287	-0.000222565	86.4191	573.134		0.491593	0	2626	0.00243536	0.000323939	714.421	-777.069		0.491593	0	2626	0.00617153	-3.92889e-05
0.467038	0	2636	0.065275	-0.00822425	180.32	-9355.66						0.467038	0	2636	0.282418	-0.0823623	59895.7	52434.9		0.467038	0	2636	0.000872336	7.49372e-05	386.513	-602.032			0.467038	0	2636	0.00446368	0.000244889	-151.909	-503.46		0.467038	0	2636	0.0118278	9.0683e-05	-4003.58	-84.6879		0.467038	0	2636	0.00536659	0.00176676
0.476504	0	2666	0.0498895	0.000770496	-611.369	114.614						0.476504	0	2666	0.0611799	0.000618158	83836	6528.69		0.476504	0	2666	0.000482981	-0.000223232	13.4349	506.354			0.476504	0	2666	0.00106539	-6.35115e-06	575.021	663.995		0.476504	0	2666	0.0106731	-0.000224229	1473.92	-1825.55		0.476504	0	2666	0.00157457	-0.000346912
0.320946	0	2673	0.00874327	-0.000335024	803.463	1040.16						0.320946	0	2673	3.8003	0.816478	18886.7	33252.5		0.320946	0	2673	0.00167206	-0.000743558	131.502	539.441			0.320946	0	2673	0.0272011	-0.0242705	39192.4	8811.38		0.320946	0	2673	0.044833	0.0360319	19522.9	-16807.6		0.320946	0	2673	0.00681486	0.0302907
0.416142	0	2684	0.0340137	-0.000262382	2553.53	5402.62						0.416142	0	2684	0.0160319	0.00928778	-37624.1	-9739.16		0.416142	0	2684	0.000272178	2.54651e-05	51.2927	32.5508			0.416142	0	2684	0.00221706	-0.000207115	95.521	120.027		0.416142	0	2684	0.00466118	0.000437121	681.696	-1227.97		0.416142	0	2684	0.0080129	-0.000394603
0.431192	0	2699	0.020787	0.000319112	-1842.4	6132.64						0.431192	0	2699	0.0523055	0.033313	-23048.3	9329.57		0.431192	0	2699	0.00112139	-5.74514e-05	103.074	87.7293			0.431192	0	2699	0.00195091	-0.000202176	-184.516	143.713		0.431192	0	2699	0.00468868	-2.96226e-05	182.1	1505		0.431192	0	2699	0.00353834	-0.000176385
0.417091	0	2708	0.00318608	0.00238103	140.894	-102.856						0.417091	0	2708	0.00395907	-0.000555207	5439.63	-8700.19		0.417091	0	2708	6.37348e-05	-5.42671e-05	-27.1992	1.77604			0.417091	0	2708	6.10663e-05	7.78491e-06	4.03991	-2.44203		0.417091	0	2708	0.000615158	0.000435956	-38.4342	23.5392		0.417091	0	2708	0.0110576	0.00995494
0.434342	0	2712	0.0100263	-0.00117341	197.539	-62.7546						0.434342	0	2712	0.0436289	-0.00427987	2195.98	-8050.31		0.434342	0	2712	0.00025813	3.00099e-05	17.4239	-1.64937			0.434342	0	2712	0.000279976	-5.38463e-05	-155.372	61.2179		0.434342	0	2712	0.00261617	-0.000647469	-210.74	-148.506		0.434342	0	2712	0.00508348	-0.00122845
0.382561	0	2718	0.0186555	-0.000392078	-1141.5	-285.017						0.382561	0	2718	0.670929	-0.17436	46847.6	434780		0.382561	0	2718	0.00115042	-0.00028101	-641.373	-13.8941			0.382561	0	2718	0.0424303	0.00981246	4845.58	-24149.8		0.382561	0	2718	0.00815172	0.017277	-61186.1	-17882.5		0.382561	0	2718	0.0427811	-0.0258191
0.416339	0	2733	0.013019	-0.000267282	730.441	-555.896						0.416339	0	2733	0.06391	0.00147164	7399.29	-18343.5		0.416339	0	2733	0.000165999	3.3546e-05	80.8929	-7.41361			0.416339	0	2733	0.0010472	-0.000144438	-86.1405	80.7899		0.416339	0	2733	0.000600656	-5.67857e-05	1099.44	-290.856		0.416339	0	2733	0.00228574	2.063e-05
0.346688	0	2750	0.0263696	-5.42238e-05	379.445	-314.481						0.346688	0	2750	0.0808034	-0.0102863	-17141.8	-15709.3		0.346688	0	2750	0.000723661	-6.76442e-05	182.005	42.1925			0.346688	0	2750	0.00429736	-6.26224e-05	-144.359	-408.615		0.346688	0	2750	0.00689043	-0.001404	1152.9	562.394		0.346688	0	2750	0.00669913	-0.00144779
0.425019	0	2753	0.00540968	-0.00279015	-2663.78	1657.91						0.425019	0	2753	0.00537946	0.00598881	850.694	-5577.51		0.425019	0	2753	0.000206527	-1.74875e-05	48.1469	16.4795			0.425019	0	2753	0.000311625	-0.000163119	33.3509	-192.185		0.425019	0	2753	0.00138755	-0.000454508	-371.272	-349.131		0.425019	0	2753	0.00196444	-0.000603384
0.321517	0	2755	0.010205	-0.000404948	-1299.63	5261.89						0.321517	0	2755	0.0244406	0.0138477	173.202	-3138.78		0.321517	0	2755	0.000643461	0.000332127	-79.3009	-104.396			0.321517	0	2755	0.0011727	0.000536811	237.254	-215.073		0.321517	0	2755	0.00675849	-8.14546e-05	-816.687	-254.183		0.321517	0	2755	0.00376239	-9.65713e-05
0.329912	0	2756	0.0306769	-0.00090685	-368.564	-161.589						0.329912	0	2756	0.0790886	-0.0182578	2641.79	2261.66		0.329912	0	2756	0.000500012	5.78411e-05	-117.688	-24.241			0.329912	0	2756	0.0017709	-5.43694e-05	-231.297	18.8343		0.329912	0	2756	0.0097337	-0.000721922	-322.092	512.989		0.329912	0	2756	0.00884008	-0.00321257
0.493068	0	2774	0.0241862	0.000803669	-2196.62	1227.86						0.493068	0	2774	2.21473	-2.13753	198405	69646.8		0.493068	0	2774	0.0010659	0.000776952	-297.878	330.182			0.493068	0	2774	0.00361376	-0.000391302	-28078.9	3820.81		0.493068	0	2774	0.0345877	0.00227592	18928.4	-8273.01		0.493068	0	2774	0.0179856	0.0119433
0.31707	0	2778	0.0876907	-0.00044631	721.025	1629.69						0.31707	0	2778	0.906244	0.256686	0	-5731.93		0.31707	0	2778	0.0012052	4.89833e-05	-126.962	-57.4063			0.31707	0	2778	0.00572028	-0.000631751	59.1819	595.33		0.31707	0	2778	0.00949153	0.00100036	-696.717	-1497		0.31707	0	2778	0.0144647	0.000244482
0.493052	0	2819	0.0075518	0.000768354	-608.095	6516.9						0.493052	0	2819	0.0445336	0.0019238	-22399.9	3225.01		0.493052	0	2819	0.000968625	2.75367e-05	112.833	-126.728			0.493052	0	2819	0.00118831	3.73719e-05	-202.978	-30.6776		0.493052	0	2819	0.00283537	0.00028505	151.387	672.377		0.493052	0	2819	0.0032655	-7.89736e-06
0.427802	0	2823	0.0342264	0.00130097	-119.933	8336.27						0.427802	0	2823	0.032602	-0.120104	8465.78	23018.7		0.427802	0	2823	0.000411372	-1.44828e-05	61.9651	20.1909			0.427802	0	2823	0.00350885	-0.000103189	622.038	-336.461		0.427802	0	2823	0.00350015	0.00019527	552.646	-220.665		0.427802	0	2823	0.0119921	-0.000463193
0.369291	0	2825	0.0618846	0.0165279	-396.957	-2757.8						0.369291	0	2825	0.773085	-0.994573	-28994.3	-115768		0.369291	0	2825	0.00102248	-7.18533e-05	-121.974	42.0021			0.369291	0	2825	0.0026717	-0.000254309	-902.804	421.202		0.369291	0	2825	0.0173692	-0.00018357	-2777.23	2928		0.369291	0	2825	0.0170414	0.00437483
0.43861	0	2832	0.0267388	-0.00201529	-974.043	8294.81						0.43861	0	2832	0.611512	-0.0768528	5052.28	5889.16		0.43861	0	2832	0.00152522	3.09106e-05	115.786	-44.8374			0.43861	0	2832	0.00270135	0.000218922	912.821	611.352		0.43861	0	2832	0.00801513	-0.000193416	992.364	134.46		0.43861	0	2832	0.00376227	-0.000138966
0.401397	0	2853	0.0564709	-0.00423302	-1847.63	-4277.38						0.401397	0	2853	0.0370006	-0.0179732	-35897.7	-13317.3		0.401397	0	2853	0.00154546	0.00408424	-720.638	1196.99			0.401397	0	2853	0.00164948	-0.00529837	3620.21	-6319.49		0.401397	0	2853	0.00405362	-0.00286698	-440.595	1827.74		0.401397	0	2853	0.0081291	0.000328448
0.369642	0	2871	0.0117238	-0.00115733	915.882	-3089.4						0.369642	0	2871	0.0145377	-0.00115544	-4163.66	738.492		0.369642	0	2871	0.000407958	1.22612e-06	5.92293	51.3462			0.369642	0	2871	0.00156949	0.000155425	62.2193	38.4127		0.369642	0	2871	0.00449386	0.000266103	-293.594	68.257		0.369642	0	2871	0.00199387	0.000102871
0.344998	0	2875	0.0031276	-0.00017477	-420.792	1143.95						0.344998	0	2875	0.0671515	-0.00592161	9643.75	3114.71		0.344998	0	2875	0.000326258	5.06876e-05	-27.3476	6.51001			0.344998	0	2875	8.18088e-05	-2.68553e-05	63.7647	80.3729		0.344998	0	2875	0.00334568	0.000382161	-56.6882	-86.7635		0.344998	0	2875	0.00114875	-0.000198127
0.37206	0	2879	0.0306501	-0.000928459	503.167	-428.259						0.37206	0	2879	0.0802473	-0.00858619	-9236.48	-35751.6		0.37206	0	2879	0.000830733	-4.27623e-05	214.204	43.2278			0.37206	0	2879	0.00471846	0.000223087	-142.771	-574.45		0.37206	0	2879	0.00818794	-0.00163477	1736.06	543.634		0.37206	0	2879	0.00870777	-0.00128111
0.314946	0	2882	0.0583117	-0.0016445	-104.929	-279.166						0.314946	0	2882	0.154695	0.0540038	101939	-27191.4		0.314946	0	2882	0.00165686	0.000455829	-173.199	190.842			0.314946	0	2882	0.00254114	-0.000875301	170.104	-480.924		0.314946	0	2882	0.00779599	-0.00358226	1518.63	-193.679		0.314946	0	2882	0.00832093	0.00183996
0.349441	0	2887	0.0720092	-0.00566937	-180.634	5652.88						0.349441	0	2887	1.38854	3.08541	60087.9	-13905.5		0.349441	0	2887	0.00108996	-0.000444134	78.3089	3.55579			0.349441	0	2887	0.00792364	-2.84627e-05	175.794	401.397		0.349441	0	2887	0.00568364	2.75107e-05	31.6837	588.906		0.349441	0	2887	0.0103494	0.0031469
0.318611	0	2896	0.0700622	0.00342737	-556.456	3168.82						0.318611	0	2896	2.57489	-0.527387	10748.5	-2117.3		0.318611	0	2896	0.00240984	0.00343018	-274.545	-405.353			0.318611	0	2896	0.00600055	-0.000995778	1225.88	-173.022		0.318611	0	2896	0.00520484	-0.000804405	-273.685	-893.91		0.318611	0	2896	0.0168581	0.00154275
0.476724	0	2901	0.0114937	0.000446226	-2239.09	7904.22						0.476724	0	2901	0.0256955	-0.00633341	-26888.5	16741.6		0.476724	0	2901	0.000735783	0.000163491	23.3919	-202.17			0.476724	0	2901	0.00200724	-0.000177486	-249.625	-23.9391		0.476724	0	2901	0.00179505	5.46909e-05	-1065.29	177.893		0.476724	0	2901	0.00199544	-0.000381313
0.45006	0	2906	0.0577235	0.0170823	-543.673	-7940.48						0.45006	0	2906	0.550579	2.70473	21643.2	-8256.78		0.45006	0	2906	0.00134778	2.69643e-05	-492.723	-193.01			0.45006	0	2906	0.00635249	-0.000321894	-732.757	499.597		0.45006	0	2906	0.018922	0.00152317	3273.13	2965.34		0.45006	0	2906	0.00483397	0.000721121
0.31746	0	2911	0.0616003	-0.000276248	-187.353	-692.443						0.31746	0	2911	0.0519951	-0.0350213	12249.8	19181.2		0.31746	0	2911	0.00150619	-0.000179506	10.5819	218.387			0.31746	0	2911	0.0022013	-0.000127103	111.42	175.017		0.31746	0	2911	0.00320279	-0.00156127	1125.01	-483.109		0.31746	0	2911	0.0161798	-0.00255928
0.364561	0	2925	0.111574	0.00319343	-209.248	-6813.89						0.364561	0	2925	0.103516	-0.0296519	-19823.8	-18629.6		0.364561	0	2925	0.00284655	1.3992e-05	284.607	31.1103			0.364561	0	2925	0.00443342	0.000268971	137.386	-180.62		0.364561	0	2925	0.000829343	0.0021664	61.2172	-814.73		0.364561	0	2925	0.00945392	-0.00113113
0.330288	0	2933	0.022441	-0.000684041	1914.08	3019.57						0.330288	0	2933	0.00872281	0.0125783	-17322.5	5992.24		0.330288	0	2933	0.000185258	-6.98333e-06	45.7987	-4.65842			0.330288	0	2933	0.00124286	-0.000207392	42.8074	53.4756		0.330288	0	2933	0.00421438	0.000344295	330.629	-598.872		0.330288	0	2933	0.00175908	-0.00055307
0.361231	0	2948	0.0711804	-0.00229732	-540.236	3367.52						0.361231	0	2948	0.138243	-0.0519148	5588.95	-58884.7		0.361231	0	2948	0.00171943	-0.00259292	975.322	366.317			0.361231	0	2948	0.00524087	0.0006438	-26.6871	127.188		0.361231	0	2948	0.00272015	0.000186823	-51.7193	1047.42		0.361231	0	2948	0.00643925	-0.00255485
0.466155	0	2950	0.0354399	0.00201504	-1245.49	1054.81						0.466155	0	2950	0.0121264	0.00202948	3491.12	3259.36		0.466155	0	2950	0.00116649	-6.78883e-05	78.2641	144.032			0.466155	0	2950	0.00221732	-0.000376628	-192.237	-515.023		0.466155	0	2950	0.0074501	0.00088988	-1364.73	680.075		0.466155	0	2950	0.00596765	-0.000282286
0.385558	0	2969	0.12569	-0.00109618	1729.2	-1676.47						0.385558	0	2969	1.90166	-0.149354	393752	86150.1		0.385558	0	2969	0.00368557	2.31276e-05	89.462	-141.156			0.385558	0	2969	0.00619237	-4.8922e-05	-679.023	-205.923		0.385558	0	2969	0.0140332	-0.0128713	212.416	-9746.32		0.385558	0	2969	0.012555	-1.59351e-06
0.354754	0	2973	0.00678621	0.000661602	-393.732	3381.6						0.354754	0	2973	0.0330288	0.00597591	12769.7	-14809.6		0.354754	0	2973	0.000788549	5.20315e-05	60.5943	-74.001			0.354754	0	2973	0.00106645	9.13385e-06	-140.954	-14.5556		0.354754	0	2973	0.00312002	0.000151429	43.9363	280.217		0.354754	0	2973	0.00296841	-0.000140638
0.401064	0	2981	0.0316857	-0.000792836	1365.12	-1159.36						0.401064	0	2981	0.0636273	-0.000755384	-34009.1	-55905.7		0.401064	0	2981	0.00034771	0.00237977	-293.028	-507.225			0.401064	0	2981	0.000789811	-0.00197647	-915.816	-729.996		0.401064	0	2981	0.00361065	0.000244093	932.053	-1586.44		0.401064	0	2981	0.00705105	0.000949453
0.437449	0	2982	0.022551	0.000507914	2111.47	-5109.75						0.437449	0	2982	2.97277	-0.156099	-116583	133978		0.437449	0	2982	0.00201076	-0.000125487	298.221	342.776			0.437449	0	2982	0.0188724	-0.00271759	-5139.49	2677.95		0.437449	0	2982	0.318277	-0.421166	-44369.7	-93373.7		0.437449	0	2982	0.262709	-0.0955165
0.33337	0	2994	0.0170645	0.0242822	-403.229	162.729						0.33337	0	2994	0.0350276	-0.0135081	-27635.9	28779.2		0.33337	0	2994	0.000248311	9.4913e-06	75.1516	-58.4994			0.33337	0	2994	0.000491383	-7.87799e-05	175.215	25.0494		0.33337	0	2994	0.0016694	-0.000405997	536.877	39.0269		0.33337	0	2994	0.00187406	-0.000128662
0.30314	0	2996	0.0801595	-0.000605659	-270.896	627.472						0.30314	0	2996	0.0813772	0.0309737	-32208.4	37150.8		0.30314	0	2996	0.00136216	-0.000104512	-42.3098	26.0706			0.30314	0	2996	0.00462026	0.000335623	-361.171	-366.766		0.30314	0	2996	0.00562593	1.59371e-05	-388.897	-651.266		0.30314	0	2996	0.00367862	-0.000293743
0.404221	0	3001	0.0881925	-0.00109722	-188.857	-1246.2						0.404221	0	3001	1.00555	-0.592892	-49068.1	193140		0.404221	0	3001	0.00136437	-0.00033842	-353.754	370.921			0.404221	0	3001	0.00521569	0.00150947	1121.98	-1305.23		0.404221	0	3001	0.0167646	-0.00391192	-594.082	-1971.02		0.404221	0	3001	0.00731478	0.0014782
0.468717	0	3010	0.00583699	-0.00255485	422.932	-226.024						0.468717	0	3010	0.174855	-0.0805511	-92051.2	245311		0.468717	0	3010	0.000110098	1.91055e-06	54.2488	22.5753			0.468717	0	3010	0.000556092	-0.000244526	-515.87	549.484		0.468717	0	3010	0.000959714	0.000281523	-247.364	1582.89		0.468717	0	3010	0.00876642	-0.00308702
0.478769	0	3012	0.0316854	-0.000733179	-850.803	-883.591						0.478769	0	3012	0.0414894	0.000516819	30852.7	-42475.2		0.478769	0	3012	0.00103386	-4.06716e-05	-144.173	88.0038			0.478769	0	3012	0.00177673	-0.000175425	102.206	354.749		0.478769	0	3012	0.00838348	-5.12364e-05	519.6	386.762		0.478769	0	3012	0.0197465	-0.00237394
0.357141	0	3016	0.024536	-0.000989901	284.578	920.422						0.357141	0	3016	0.00547943	0.00579496	-15774.9	-22549.3		0.357141	0	3016	0.000699874	0.000115804	25.1493	7.30949			0.357141	0	3016	0.00132219	-0.000134215	75.4077	18.8235		0.357141	0	3016	0.00261124	-3.38028e-05	-51.1547	-144.948		0.357141	0	3016	0.00469775	-0.000355167
0.459633	0	3051	0.111992	-0.00050444	2301.23	-679.984						0.459633	0	3051	1.44823	-2.17384	0	-12045.2		0.459633	0	3051	0.00156696	0.000321321	-245.937	-148.639			0.459633	0	3051	0.015101	0.000488577	1929.84	-827.94		0.459633	0	3051	0.00624391	-0.000141842	-3241.36	1181.03		0.459633	0	3051	0.0101595	-0.000938807
0.464843	0	3055	0.082284	0.00179972	1823.92	-1995.1						0.464843	0	3055	1.29531	-0.156245	-19374.5	-131116		0.464843	0	3055	0.00280939	6.7881e-05	11.945	-129.451			0.464843	0	3055	0.0066019	0.000740904	-1053.76	-691.142		0.464843	0	3055	0.014259	0.00109224	1489.27	-333.567		0.464843	0	3055	0.0084246	-0.000844567
0.425902	0	3058	0.0232131	0.000587036	-1408.81	-445.724						0.425902	0	3058	2.95913	-4.74989	-205259	-151511		0.425902	0	3058	0.00277598	-0.000159176	-208.843	483.236			0.425902	0	3058	0.0312136	-0.0076752	-33591.6	-9408.77		0.425902	0	3058	0.0714979	0.00636869	-56521.8	-11778.4		0.425902	0	3058	0.287555	-0.19065
0.387867	0	3060	0.0594109	0.00397184	803.968	-435.083						0.387867	0	3060	0.0942262	-0.0279559	-99697.4	82457.1		0.387867	0	3060	0.000391473	2.54831e-05	100.011	21.2759			0.387867	0	3060	0.00817524	0.00012386	-560.063	224.679		0.387867	0	3060	0.0124222	-0.000243695	2125.01	-2444.02		0.387867	0	3060	0.0134036	1.03458e-05
0.344127	0	3064	0.0241196	0.0014756	-1469.26	4576.81						0.344127	0	3064	0.00728475	-0.0207977	3921.64	9387.13		0.344127	0	3064	0.00115108	-0.000196137	-47.2105	109.687			0.344127	0	3064	0.00227415	-0.000263255	-157.552	-289.871		0.344127	0	3064	0.00523038	-0.000343592	-719.658	75.6673		0.344127	0	3064	0.00247511	0.000354203
0.352826	0	3065	0.0307944	0.000113019	130.793	91.0396						0.352826	0	3065	0.0384624	0.014566	-12159.7	3210.31		0.352826	0	3065	0.00097855	-8.23676e-05	27.4297	6.94235			0.352826	0	3065	0.000953124	-3.0557e-06	-290.956	91.4901		0.352826	0	3065	0.00697722	-0.000192913	-160.436	-753.488		0.352826	0	3065	0.0117432	-0.000406372
0.351167	0	3066	0.0412459	0.00144502	-357.97	-7511.22						0.351167	0	3066	0.0853419	0.0452732	58473	86814		0.351167	0	3066	0.00061154	4.23328e-06	303.431	-62.7746			0.351167	0	3066	0.00284277	0.000310004	185.93	-144.038		0.351167	0	3066	0.0112086	6.59301e-05	711.702	-845.568		0.351167	0	3066	0.00737115	0.00194424
0.475767	0	3077	0.0565548	0.00322242	187.343	-11316.5						0.475767	0	3077	0.126545	0.00941572	142882	-5966.36		0.475767	0	3077	0.00113554	5.66919e-05	525.606	-284.283			0.475767	0	3077	0.00237278	0.000419578	423.479	-651.571		0.475767	0	3077	0.0124817	0.000727021	567.633	-574.304		0.475767	0	3077	0.0107552	0.000386045
0.362956	0	3080	0.0765323	-0.000374665	138.32	1002.55						0.362956	0	3080	0.346484	0.113225	-3228.5	59263.5		0.362956	0	3080	0.00174158	2.6533e-05	-12.0859	81.8439			0.362956	0	3080	0.00650322	0.000125157	-391.173	287.983		0.362956	0	3080	0.00849748	0.00050486	-556.97	-1417.43		0.362956	0	3080	0.0123384	0.00150754
0.349894	0	3088	0.0114069	0.00379187	327.667	-7321.86						0.349894	0	3088	1.05341	-1.10943	0	-6980.15		0.349894	0	3088	0.0017434	4.47021e-05	80.9949	115.092			0.349894	0	3088	0.00176441	-3.15857e-05	88.4836	118.168		0.349894	0	3088	0.00727013	0.00134188	586.385	797.75		0.349894	0	3088	0.0064389	-0.00631578
0.401312	0	3091	0.0124708	0.000153219	-721.124	887.519						0.401312	0	3091	0.0264241	0.00678757	-9573.29	18124.1		0.401312	0	3091	0.000348679	6.20602e-05	-31.4074	29.151			0.401312	0	3091	0.000560952	0.000199781	75.1318	-220.84		0.401312	0	3091	0.000615109	-0.000121936	560.589	417.322		0.401312	0	3091	0.00226453	0.000582858
0.364387	0	3108	0.127605	-0.00133739	764.874	-1820.67						0.364387	0	3108	0.353784	-0.00592257	21096.6	-50244.7		0.364387	0	3108	0.00133388	-0.000310359	198.034	-5.46427			0.364387	0	3108	0.00163912	0.000439934	-427.242	-1041.15		0.364387	0	3108	0.00578097	0.00120426	-584.097	-200.161		0.364387	0	3108	0.00752805	0.00128254
0.327457	0	3112	0.0590418	-0.00918441	-503.6	-5693.5						0.327457	0	3112	0.467161	-1.63142	-53282.9	193266		0.327457	0	3112	0.00109643	-0.000181205	97.0461	252.122			0.327457	0	3112	0.00309367	9.13587e-05	-352.269	-40.641		0.327457	0	3112	0.0105648	0.000323944	393.827	-1132.87		0.327457	0	3112	0.0118776	-0.001453
0.347256	0	3113	0.0964825	-0.00324064	-359.177	2647.01						0.347256	0	3113	0.97284	-0.0600389	72038.4	11709.8		0.347256	0	3113	0.00119545	0.000179494	-99.5739	-120.524			0.347256	0	3113	0.00695167	-0.00064099	155.718	628.868		0.347256	0	3113	0.00556044	0.000745588	-84.7016	-1797.37		0.347256	0	3113	0.0151039	0.000138622
0.426677	0	3114	0.0572327	-0.00219041	35.6109	337.094						0.426677	0	3114	0.0266431	0.0536759	-26634.5	-64791		0.426677	0	3114	0.00159118	-1.86375e-05	25.5852	-46.9725			0.426677	0	3114	0.00475902	-0.000270262	-176.105	293.272		0.426677	0	3114	0.00934238	-0.000245818	-520.22	-2384.77		0.426677	0	3114	0.0123146	-0.000214996
0.381515	0	3116	0.014336	0.000702778	88.492	-240.874						0.381515	0	3116	0.0326054	-0.0132401	54961.2	1936.3		0.381515	0	3116	7.53643e-05	-7.27582e-05	-123.767	-74.2291			0.381515	0	3116	0.000277163	-8.87836e-05	-80.9085	101.426		0.381515	0	3116	0.00368344	0.000737148	-380.421	375.393		0.381515	0	3116	0.00254036	0.000611783
0.398715	0	3117	0.0383034	0.00302465	-3310.74	3735.75						0.398715	0	3117	0.00974727	0.00064879	-1258.04	-1285.34		0.398715	0	3117	0.00195988	-4.33498e-06	-160.037	-162.747			0.398715	0	3117	0.00223903	-0.000108085	-774.995	-614.733		0.398715	0	3117	0.00512307	3.22542e-05	-1182.47	690.137		0.398715	0	3117	0.00372964	0.000142981
0.350384	0	3123	0.0023756	0.000134104	-75.5803	29.7655						0.350384	0	3123	0.00210686	0.000732489	213.629	615.354		0.350384	0	3123	0.000523569	3.1992e-05	-27.97	36.7982			0.350384	0	3123	0.000565872	-9.07558e-05	-95.8146	-63.7883		0.350384	0	3123	0.00262212	-0.000278385	156.678	60.811		0.350384	0	3123	0.000851293	0.000108026
0.370831	0	3132	0.000938454	4.15373e-05	299.573	-273.076						0.370831	0	3132	0.00446082	0.0021582	-195.77	-1432.83		0.370831	0	3132	0.000262009	4.01801e-05	-42.4998	-63.1482			0.370831	0	3132	0.00119528	-2.54523e-05	-123.52	-132.455		0.370831	0	3132	0.00240586	-0.000194087	255.259	134.784		0.370831	0	3132	0.000433341	-1.73704e-05
0.444916	0	3135	0.0489894	-0.00142027	-303.178	-971.657						0.444916	0	3135	0.0626614	0.0100524	-36402.1	-158267		0.444916	0	3135	0.000427858	0.000189194	-90.6533	7.95099			0.444916	0	3135	0.00221931	-6.66251e-05	-1559.91	768.034		0.444916	0	3135	0.0109771	0.00128667	3246.65	-4772.14		0.444916	0	3135	0.00951662	-0.000386902
0.477405	0	3136	0.038883	0.00255536	370.929	3577.79						0.477405	0	3136	0.0124315	0.00507542	10899.7	2534.34		0.477405	0	3136	0.00159327	1.09086e-05	17.4661	94.5034			0.477405	0	3136	0.00196403	-0.000393126	-98.3582	-721.827		0.477405	0	3136	0.0126024	0.00117213	-2009.4	-599.271		0.477405	0	3136	0.00652261	0.0003098
0.353929	0	3137	0.021922	-0.00327687	1267.7	3442.32						0.353929	0	3137	1.41732	-1.33778	0	-7142.05		0.353929	0	3137	0.00147334	5.12249e-05	-224.866	123.768			0.353929	0	3137	0.00167092	9.44189e-05	-596.498	1447.56		0.353929	0	3137	0.00931917	-0.000895016	-4288.7	2768.35		0.353929	0	3137	0.0447024	0.00782594
0.424404	0	3140	0.00561738	-0.00395816	23.0696	-143.366						0.424404	0	3140	0.0159932	-0.00961927	-4631.31	9463.94		0.424404	0	3140	0.000151654	7.64276e-05	-17.517	-5.78636			0.424404	0	3140	6.6545e-05	-5.60952e-05	-28.3975	3.20704		0.424404	0	3140	0.000712588	-0.000416167	881.53	249.106		0.424404	0	3140	0.000581847	0.000232028
0.30981	0	3144	0.043888	-0.00675031	-457.216	-1529.42						0.30981	0	3144	3.10243	-1.21582	0	-5472.45		0.30981	0	3144	0.00408582	-0.000188795	379.87	-81.4342			0.30981	0	3144	0.00563018	0.000416038	726.345	-1198.2		0.30981	0	3144	0.016399	0.0013993	5074.31	5694.32		0.30981	0	3144	0.0250571	-0.0123094
0.493842	0	3162	0.0671808	-0.00292464	-2146.12	81.9157						0.493842	0	3162	0.227244	-0.296312	59085.7	64198.4		0.493842	0	3162	0.00108004	2.38988e-05	-291.355	0.843144			0.493842	0	3162	0.00760657	-0.000268691	745.603	217.73		0.493842	0	3162	0.00812002	-0.000304721	5907.25	-4591.61		0.493842	0	3162	0.0138993	-0.00160193
0.301889	0	3163	0.0859723	0.00291506	89.779	-982.469						0.301889	0	3163	0.0664062	-0.323687	-41474.5	14393.3		0.301889	0	3163	0.000840481	-6.50917e-05	-34.7214	263.225			0.301889	0	3163	0.000668873	-5.83505e-05	317.088	179.981		0.301889	0	3163	0.0133688	0.000300035	-549.551	-1114.38		0.301889	0	3163	0.00147678	6.05008e-05
0.484813	0	3170	0.0235649	0.00174223	-3086.18	3988.69						0.484813	0	3170	0.0164167	0.00580575	1377.24	-13988.8		0.484813	0	3170	0.0010301	-6.94674e-06	124.601	77.5733			0.484813	0	3170	0.00311903	-9.55452e-05	322.166	-740.143		0.484813	0	3170	0.00525129	-6.70683e-05	-1138.16	54.2907		0.484813	0	3170	0.00447903	0.000136574
0.488139	0	3179	0.0474829	-0.00276378	-1506.58	-4184.51						0.488139	0	3179	0.0369488	-0.0119628	29720.8	-31700.3		0.488139	0	3179	0.000900873	0.000430112	139.273	-179.762			0.488139	0	3179	0.00119108	-0.000381263	-199.262	1904.04		0.488139	0	3179	0.00309256	-0.000860641	1276.38	-1006.51		0.488139	0	3179	0.000939754	-0.00200972
0.373081	0	3186	0.0689062	-0.00359315	1537.21	-6635.3						0.373081	0	3186	1.73422	2.08377	-13535.8	-86698.5		0.373081	0	3186	0.000504607	0.000150677	3.00929	-414.288			0.373081	0	3186	0.00302145	0.000519732	152.134	-434.669		0.373081	0	3186	0.0197732	0.000405187	437.889	-51.0293		0.373081	0	3186	0.00939036	-0.000832087
0.489293	0	3190	0.0622349	0.000547966	-370.453	-2047.08						0.489293	0	3190	0.0419148	-0.0238685	-107123	-7648.81		0.489293	0	3190	0.00166972	-0.000104594	-96.5292	363.065			0.489293	0	3190	0.00161973	-0.000316692	226.156	717.006		0.489293	0	3190	0.00286929	0.000393505	3465.97	-2211.59		0.489293	0	3190	0.0116748	-0.00243646
0.329979	0	3200	0.0439131	-0.00744061	216.003	-531.573						0.329979	0	3200	0.0928347	-0.0653272	-58531.9	20394.7		0.329979	0	3200	0.000551892	0.000408085	41.3708	-274.83			0.329979	0	3200	0.0027076	9.74931e-06	61.729	-237.034		0.329979	0	3200	0.00667259	-0.000545757	-659.097	1847.3		0.329979	0	3200	0.00269556	-0.000357131
0.364572	0	3201	0.00743035	9.42701e-05	149.457	3433.08						0.364572	0	3201	0.0511748	0.00458208	-4231.9	7864.44		0.364572	0	3201	0.000640997	6.08889e-05	-21.5897	-9.79462			0.364572	0	3201	0.000455949	2.93007e-05	241.975	51.3748		0.364572	0	3201	0.00665547	0.000152256	283.937	133.122		0.364572	0	3201	0.00316513	4.61696e-05
0.305656	0	3205	0.00960138	-0.00217582	-424.396	-347.046						0.305656	0	3205	0.0180726	0.00655904	-3682.8	32.0358		0.305656	0	3205	0.000241463	-1.8219e-05	7.17523	-11.8151			0.305656	0	3205	0.000110718	5.01721e-05	20.8451	13.7709		0.305656	0	3205	0.00109097	-0.00050759	273.637	39.1462		0.305656	0	3205	0.00176429	0.000708004
0.433851	0	3238	0.0248596	-0.00337306	1456.53	6557.07						0.433851	0	3238	2.09515	-0.574215	181932	-89784.9		0.433851	0	3238	0.000875254	0.000381061	-609.174	35.3264			0.433851	0	3238	0.00820025	0.000916292	-2406.55	-2725.79		0.433851	0	3238	0.0100009	0.0037662	-4269.95	-4207.09		0.433851	0	3238	0.0422992	0.00512995
0.319301	0	3252	0.0160449	-0.000102305	-545.893	4356.32						0.319301	0	3252	0.0122058	-0.00904152	-9084.48	-3346.09		0.319301	0	3252	0.00147309	-0.000151863	-105.864	37.4268			0.319301	0	3252	0.0034535	6.39544e-05	52.7859	-154.021		0.319301	0	3252	0.00385108	0.000338034	-152.639	-417.428		0.319301	0	3252	0.000513353	9.08715e-05
0.375631	0	3259	0.00855173	0.000562068	-989.55	4524.67						0.375631	0	3259	0.0266118	0.000580392	-2030.57	-6653.01		0.375631	0	3259	0.000771606	0.000153536	34.67	-91.8618			0.375631	0	3259	0.00145153	-0.0001128	-159.008	-15.9173		0.375631	0	3259	0.00300997	0.000129738	-277.581	178.436		0.375631	0	3259	0.00265159	-0.000340515
0.4017	0	3270	0.0360241	0.0103831	-961.039	-10302.8						0.4017	0	3270	0.0663746	-0.0463127	72917.6	-11858		0.4017	0	3270	0.0010301	0.000106702	344.847	32.6192			0.4017	0	3270	0.00253965	0.000115578	221.411	-104.214		0.4017	0	3270	0.0109867	0.00101148	-42.7673	-946.026		0.4017	0	3270	0.00370059	6.74718e-05
0.430549	0	3277	0.00362822	-4.85922e-05	-447.984	-93.9866						0.430549	0	3277	0.00718977	0.00149329	398.19	-91.5219		0.430549	0	3277	0.000680197	-2.68469e-05	63.8197	132.269			0.430549	0	3277	0.000779194	0.000109602	-196.542	-118.18		0.430549	0	3277	0.00233532	-0.000283728	-542.597	88.8523		0.430549	0	3277	0.00160147	0.000212102
0.402375	0	3278	0.0326362	-0.00550908	855.195	5693.45						0.402375	0	3278	2.4207	-0.330148	-19096.3	36555		0.402375	0	3278	0.00149392	6.6421e-05	-431.375	31.6699			0.402375	0	3278	0.0083437	-0.00153948	-2312.82	-731.642		0.402375	0	3278	0.0177954	-0.00509835	-11542.5	3932.8		0.402375	0	3278	0.0105772	0.00448746
0.303323	0	3286	0.0366022	-0.00286545	-363.755	3862.18						0.303323	0	3286	0.78369	1.31015	157329	115829		0.303323	0	3286	0.00119293	1.05039e-05	57.2194	24.1249			0.303323	0	3286	0.00471121	0.000352377	428.667	67.1161		0.303323	0	3286	0.00725942	-0.000142872	370.753	-239.264		0.303323	0	3286	0.00391429	-0.00117817
0.38824	0	3289	0.0324475	-0.000331785	369.785	-417.608						0.38824	0	3289	0.121366	-0.0392305	18844.7	-40600.8		0.38824	0	3289	0.00161617	8.80392e-05	-112.865	-110.062			0.38824	0	3289	0.00207965	-0.000396571	162.169	296.08		0.38824	0	3289	0.00949871	-0.000162259	857.845	-569.792		0.38824	0	3289	0.006574	0.000131628
0.426826	0	3307	0.0287611	-0.00174167	-41.6863	42.3853						0.426826	0	3307	0.0195287	-0.0028139	-18390.5	-2070.08		0.426826	0	3307	0.000503649	0.000115094	-158.55	-16.7599			0.426826	0	3307	0.0040486	0.00015401	-25.5788	-102.215		0.426826	0	3307	0.00923774	-0.000784003	1134.95	985.846		0.426826	0	3307	0.0118375	-0.00122253
0.360954	0	3310	0.0266559	-0.00199029	2141.93	3931.38						0.360954	0	3310	0.0093008	0.00688366	14397.2	5076.05		0.360954	0	3310	0.000288033	1.30541e-05	34.9957	22.6684			0.360954	0	3310	0.00139707	-0.000150434	43.9214	94.3503		0.360954	0	3310	0.00377045	0.000270365	310.8	-788.306		0.360954	0	3310	0.00435482	-0.0001122
0.339822	0	3311	0.0439078	0.00124208	883.819	-1116.84						0.339822	0	3311	0.0554026	0.0160352	20850.5	-22527.6		0.339822	0	3311	0.00063043	-0.000137261	126.69	101.518			0.339822	0	3311	0.00419413	0.000345543	-78.3212	-614.713		0.339822	0	3311	0.00616287	0.00109644	-274.202	505.576		0.339822	0	3311	0.00518989	0.00119223
0.311445	0	3313	0.0905429	-0.000353023	305.07	-754.906						0.311445	0	3313	1.01924	-0.462366	55429.3	7408.87		0.311445	0	3313	0.00107732	0.000398019	-34.1301	-257.027			0.311445	0	3313	0.0108577	0.000309406	-279.252	-63.8773		0.311445	0	3313	0.0209851	-0.000963671	3.26069	-373.966		0.311445	0	3313	0.00863931	-0.00104176
0.367529	0	3318	0.0357066	-0.0014744	-1299.53	-2774.96						0.367529	0	3318	0.00924978	0.00119175	1258.76	-596.175		0.367529	0	3318	0.00101342	-4.83612e-05	-17.7203	-243.612			0.367529	0	3318	0.00580838	0.000128727	-24.3233	-383.558		0.367529	0	3318	0.0130362	0.000262217	-334.152	80.737		0.367529	0	3318	0.00215766	-0.000140172
0.473495	0	3327	0.0885626	-0.000173175	-967.843	-1120.41						0.473495	0	3327	0.0924399	0.0629307	82712.2	-32543.5		0.473495	0	3327	0.000703578	5.61203e-05	514.363	-321.808			0.473495	0	3327	0.00154687	-0.000460027	-607.411	-240.601		0.473495	0	3327	0.0162421	0.00383469	-9277.53	-4766.13		0.473495	0	3327	0.00448822	-0.000538849
0.478532	0	3328	0.0164976	0.000600059	862.39	-3427.76						0.478532	0	3328	5.7624	1.08349	-15734.1	-62674.8		0.478532	0	3328	0.00325188	-5.13418e-06	8.65266	317.516			0.478532	0	3328	0.00898066	-0.000674592	1139.49	405.037		0.478532	0	3328	0.0292142	0.00427426	-17899.8	965.349		0.478532	0	3328	0.0199155	-0.010405
0.475927	0	3340	0.0989867	-0.000396916	-1975.93	-1815.11						0.475927	0	3340	0.503823	0.152154	51040.1	-28723.4		0.475927	0	3340	0.00194756	-0.000174988	464.598	-352.459			0.475927	0	3340	0.00351846	0.000940579	-765.168	-790.056		0.475927	0	3340	0.0124024	0.000832979	-2138.06	4426.97		0.475927	0	3340	0.010979	-0.0010896
0.464851	0	3356	0.0325794	-0.000697061	-1561.57	-703.994						0.464851	0	3356	2.74911	-0.267097	-100823	121834		0.464851	0	3356	0.00313786	8.75223e-06	-600.197	145.302			0.464851	0	3356	0.0476485	0.00511115	7207.22	-10753		0.464851	0	3356	0.137505	0.135962	4001.45	-111434		0.464851	0	3356	0.348132	0.304764
0.336082	0	3377	0.0321614	0.000695809	-460.677	2641.19						0.336082	0	3377	0.0365367	-0.0288819	5095.04	-5794.21		0.336082	0	3377	0.000729366	-2.14997e-05	-98.6475	24.2762			0.336082	0	3377	0.0011083	0.0001042	244.232	142.206		0.336082	0	3377	0.00345735	0.000869107	-261.016	153.228		0.336082	0	3377	0.00240652	0.000574532
0.392063	0	3380	0.0792279	-0.00115623	-971.457	971.131						0.392063	0	3380	0.242828	-0.0677702	14208.6	94862.3		0.392063	0	3380	0.00186102	-0.000147245	120.124	76.9657			0.392063	0	3380	0.00349613	0.000117198	-305.903	-695.546		0.392063	0	3380	0.0144153	-0.00117177	1417.71	4062.02		0.392063	0	3380	0.0110073	-6.95651e-05
0.344916	0	3382	0.103104	-0.000824021	-2086.37	-3466.68						0.344916	0	3382	1.47779	-0.791324	54989	-18595.6		0.344916	0	3382	0.00300093	-0.0037861	191.884	100.149			0.344916	0	3382	0.00356701	-0.00663041	1264.1	575.961		0.344916	0	3382	0.0201978	-7.2232e-05	954.224	1388.4		0.344916	0	3382	0.00891234	0.0017809
0.301625	0	3390	0.0701335	-0.00418794	-159.1	596.042						0.301625	0	3390	0.0634422	-0.0597351	25221.1	66920.2		0.301625	0	3390	0.00159219	-4.47424e-05	-47.9986	66.7161			0.301625	0	3390	0.00481799	-0.000504295	-395.171	-57.4918		0.301625	0	3390	0.00710518	0.000261378	-493.897	-921.372		0.301625	0	3390	0.00609916	0.000739836
0.370036	0	3408	0.0755324	-0.000792022	2.99974	-1802.07						0.370036	0	3408	0.0792159	-2.00602	-1937.12	-11610.5		0.370036	0	3408	0.000534385	-0.000357429	-290.135	192.522			0.370036	0	3408	0.00387871	0.00123464	353.239	-1428.54		0.370036	0	3408	0.0105299	0.00117456	-447.764	-1010.58		0.370036	0	3408	0.0109893	3.55251e-06
0.39651	0	3410	0.0541382	0.000175461	-419.432	-215.989						0.39651	0	3410	0.157244	-0.0399863	-86362.8	-29431.1		0.39651	0	3410	0.00117438	-1.87007e-05	136.934	-72.3247			0.39651	0	3410	0.00805717	0.000499945	-168.717	-711.614		0.39651	0	3410	0.016118	-0.00108699	1060.82	-31.9114		0.39651	0	3410	0.0117141	9.6758e-06
0.316249	0	3420	0.0770616	-0.00323344	570.937	-737.809						0.316249	0	3420	0.00810149	0.0271111	-44938	-17914.3		0.316249	0	3420	0.00111672	0.000252182	-27.6105	-52.8185			0.316249	0	3420	0.00471324	0.000373594	357.447	-321.693		0.316249	0	3420	0.0131765	-0.00111621	-199.466	-1655.52		0.316249	0	3420	0.00592662	-0.00277052
0.33896	0	3429	0.115313	-0.000903306	984.335	1108.23						0.33896	0	3429	2.38041	2.41674	0	-6550.68		0.33896	0	3429	0.00155099	0.000302698	-334.782	112.499			0.33896	0	3429	0.0119273	-0.000954899	2045.63	642.328		0.33896	0	3429	0.00285677	0.00357214	-1561.32	6384.87		0.33896	0	3429	0.0228089	0.00556954
0.466538	0	3430	0.0759896	-0.000962622	69.9904	1537.52						0.466538	0	3430	0.0542449	-0.0949297	35926	104878		0.466538	0	3430	0.00180222	-2.73629e-05	-15.9249	159.86			0.466538	0	3430	0.00631954	-0.000132989	-637.446	471.658		0.466538	0	3430	0.00855996	0.000449071	-867.839	-2240.64		0.466538	0	3430	0.011589	0.00116355
0.365452	0	3444	0.0725624	0.00149454	-1065.63	-5586.28						0.365452	0	3444	0.0132253	-0.0248882	16867.5	30565.6		0.365452	0	3444	0.00127231	-0.000270501	141.48	152.811			0.365452	0	3444	0.00267923	-1.02922e-05	379.337	-256.375		0.365452	0	3444	0.00333131	0.000727187	651.761	618.837		0.365452	0	3444	0.00842061	0.00351246
0.467595	0	3462	0.000209254	-0.000440041	160.292	-255.718						0.467595	0	3462	0.00354712	0.000383613	-2174.96	-1214.04		0.467595	0	3462	0.000167278	2.81206e-05	-51.1098	-71.1692			0.467595	0	3462	0.00051136	-2.33964e-05	118.683	145.914		0.467595	0	3462	0.00022171	-1.61337e-05	272.662	183.216		0.467595	0	3462	0.000244301	0.00014892
0.353428	0	3469	0.109579	0.00380654	-3164.28	-4344.53						0.353428	0	3469	1.18733	-2.29074	-218637	202857		0.353428	0	3469	0.00210374	0.000473566	-358.401	-70.9322			0.353428	0	3469	0.0122553	-0.000741436	1672.43	-1022.74		0.353428	0	3469	0.00966214	0.00262665	-202.331	-1932.89		0.353428	0	3469	0.0231256	0.000779953
0.379002	0	3472	0.0164196	0.000339007	463.67	2091.18						0.379002	0	3472	0.037438	0.00400816	-953.905	106.094		0.379002	0	3472	0.000335627	-4.98494e-05	71.8738	3.39925			0.379002	0	3472	0.0015958	0.000124524	81.2091	-65.637		0.379002	0	3472	0.000585714	-4.61538e-05	270.68	765.952		0.379002	0	3472	0.000427043	0.000118161
0.436823	0	3473	0.0315021	0.000457552	1261.19	7594.51						0.436823	0	3473	0.057381	0.00293304	-50834.2	33015.1		0.436823	0	3473	0.000225574	1.43451e-05	128.812	-15.5347			0.436823	0	3473	0.00279023	-8.18081e-05	641.608	-219.843		0.436823	0	3473	0.00430867	1.13515e-05	99.6703	-726.827		0.436823	0	3473	0.0080845	-0.00053429
0.461043	0	3480	0.0633392	-0.00159112	2833.49	992.913						0.461043	0	3480	0.0590357	-0.0272677	91679.2	-88939.6		0.461043	0	3480	0.000489648	-2.90246e-05	-234.078	-82.4733			0.461043	0	3480	0.00237956	0.000217241	-405.347	-288.29		0.461043	0	3480	0.00467809	-0.000504508	194.325	-635.346		0.461043	0	3480	0.00181338	-0.000379826
0.493509	0	3481	0.0141058	-0.000642053	2784.7	-1011.4						0.493509	0	3481	0.0189078	-0.00119274	-4205.89	-226.832		0.493509	0	3481	0.000184543	-4.55299e-05	-126.138	-135.599			0.493509	0	3481	0.00163481	0.000222269	96.3767	-282.925		0.493509	0	3481	0.0045626	0.000429867	-11.6972	376.469		0.493509	0	3481	0.000712236	0.000171161
0.38836	0	3483	0.0928087	-0.0059015	-566.859	1416.23						0.38836	0	3483	0.0716034	0.476347	0	-8599.24		0.38836	0	3483	0.00218218	2.93645e-05	-1.27409	136.827			0.38836	0	3483	0.00670435	-0.000290833	-525.066	-215.645		0.38836	0	3483	0.00553937	0.000545366	-432.16	-1804.5		0.38836	0	3483	0.00657647	0.00097086
0.444866	0	3486	0.0693861	0.00624371	-101.35	-1700.07						0.444866	0	3486	0.160749	-0.0107982	-23188.2	18046.7		0.444866	0	3486	0.003815	-0.000227721	70.3597	121.839			0.444866	0	3486	0.00467786	-0.000542669	193.219	26.2055		0.444866	0	3486	0.0168046	-0.00141498	638.486	1239.48		0.444866	0	3486	0.00519043	0.00145331
0.376713	0	3495	0.0338412	0.00799684	917.204	-3844.27						0.376713	0	3495	1.51731	-0.534656	98391	222850		0.376713	0	3495	0.00315163	-0.000151102	70.2698	-81.2845			0.376713	0	3495	0.0258959	0.0423476	15535.5	-381.325		0.376713	0	3495	3.10699	-0.669948	-29307.7	-257.696		0.376713	0	3495	0.204175	2.24259
0.471024	0	3509	0.0182836	7.62494e-05	-1851.71	9187.79						0.471024	0	3509	0.0164551	-0.00176316	-9314.51	4008.87		0.471024	0	3509	0.00204383	-9.66511e-05	-358.88	39.9487			0.471024	0	3509	0.00483301	6.56436e-05	297.787	-650.243		0.471024	0	3509	0.00393714	0.000435752	-237.013	-2468.52		0.471024	0	3509	0.00156299	0.000184019
0.342547	0	3513	0.0122572	0.00689874	294.674	-224.213						0.342547	0	3513	0.0628593	0.00242557	18269.3	-31974.4		0.342547	0	3513	0.000298616	-7.85016e-05	58.8064	-6.21453			0.342547	0	3513	0.000212793	-5.71479e-05	-120.11	102.748		0.342547	0	3513	0.00351118	3.79034e-06	-626.049	-30.8182		0.342547	0	3513	0.00056647	0.000317488
0.468942	0	3523	0.0373802	0.000201657	272.94	203.544						0.468942	0	3523	0.0148625	0.00999963	-64653.2	30365.8		0.468942	0	3523	0.00143069	-8.45421e-05	50.5417	-5.82142			0.468942	0	3523	0.00191146	0.000244789	-523.519	106.731		0.468942	0	3523	0.00727615	-0.00022069	-750.728	-1962.57		0.468942	0	3523	0.0118056	0.000243145
0.460891	0	3526	0.0155558	-0.000103949	-1507.62	4171.41						0.460891	0	3526	0.0333569	-0.0025506	34491.5	21055.7		0.460891	0	3526	0.000659497	5.57924e-06	-172.747	69.2741			0.460891	0	3526	0.000345813	9.42555e-05	28.997	354.845		0.460891	0	3526	0.00387194	0.000388652	-513.899	61.2479		0.460891	0	3526	0.000863262	-5.35949e-05
0.330097	0	3528	0.00722322	0.000885072	38.9749	-129.363						0.330097	0	3528	0.000974956	0.000475317	3156.82	261.597		0.330097	0	3528	1.47097e-05	5.88858e-06	4.39966	1.41713			0.330097	0	3528	0.000240167	-0.000245979	-22.5623	-0.6885		0.330097	0	3528	0.000308648	0.000287246	116.052	5.81182		0.330097	0	3528	0.000160729	0.000110233
0.484382	0	3545	0.0223061	0.00033882	288.065	-490.243						0.484382	0	3545	0.0808008	0.029797	3440.67	-32435		0.484382	0	3545	0.000527144	-4.4689e-05	-195.786	46.0317			0.484382	0	3545	0.00110648	8.32552e-05	119.439	-46.7432		0.484382	0	3545	0.00543722	-0.000735812	-16.4021	845.6		0.484382	0	3545	0.00862836	-0.00201038
0.366536	0	3547	0.0184254	0.000966578	586.984	-2699.11						0.366536	0	3547	3.94295	-1.10037	0	-7659.91		0.366536	0	3547	0.0028305	-0.000172903	257.88	396.555			0.366536	0	3547	0.0109592	-0.000724326	-176.392	1476.01		0.366536	0	3547	0.0223924	-0.0189462	2394.42	-2774.43		0.366536	0	3547	0.0358889	0.0164043
0.424719	0	3551	0.0895364	0.00229568	552.094	-1854.08						0.424719	0	3551	1.20434	-2.00624	0	-10284.8		0.424719	0	3551	0.00220714	-4.24874e-05	-360.848	463.24			0.424719	0	3551	0.0111726	-3.90566e-05	966.296	-676.307		0.424719	0	3551	0.0108149	-0.00214443	-3845.7	-3976.56		0.424719	0	3551	0.0117694	-0.00287015
0.46857	0	3555	0.0478093	0.000911508	-54.2031	8882.91						0.46857	0	3555	0.0437107	-0.0203798	57445.4	-24004.7		0.46857	0	3555	0.000140064	-2.25396e-05	-16.1525	45.9705			0.46857	0	3555	0.00398468	-0.000175269	222.215	-64.1464		0.46857	0	3555	0.00379982	-0.000354136	1038.92	-351.079		0.46857	0	3555	0.0138506	2.20796e-05
0.312546	0	3560	0.133093	0.00161474	1083.83	-3193.04						0.312546	0	3560	0.593508	0.569349	-39032.6	-59418.8		0.312546	0	3560	0.000332837	6.75009e-05	31.6673	175.805			0.312546	0	3560	0.00475755	0.000471462	-482.269	-472.778		0.312546	0	3560	0.00533053	0.00174318	-61.8565	1442.88		0.312546	0	3560	0.0149283	-0.00260235
0.471889	0	3566	0.0328998	-0.000117843	787.342	58.9685						0.471889	0	3566	0.0386935	-0.0216974	10635.6	-4757.31		0.471889	0	3566	0.000475902	0.000124328	-9.62967	-195.479			0.471889	0	3566	0.00388676	-0.000219598	-234.964	29.034		0.471889	0	3566	0.00262395	0.000242834	-160.73	-2319.4		0.471889	0	3566	0.00732173	0.00118325
0.489353	0	3576	0.0274562	-0.000598598	-72.8159	-48.9308						0.489353	0	3576	0.102896	-0.0300414	52578.9	-13592.2		0.489353	0	3576	0.00153948	2.42404e-05	23.2988	-0.107574			0.489353	0	3576	0.00221494	-0.00025743	-194.179	-328.36		0.489353	0	3576	0.0073886	-0.000205978	1530.74	-464.833		0.489353	0	3576	0.00590982	0.000131741
0.376986	0	3580	0.0326401	-0.00104129	-289.53	310.371						0.376986	0	3580	4.16673	-0.384821	0	-8102.9		0.376986	0	3580	0.0244823	0.0104961	17587.9	-34604.1			0.376986	0	3580	2.34903	-0.671867	0	-8102.9		0.376986	0	3580	3.23157	-4.77714	0	-8102.9		0.376986	0	3580	3.2809	-4.2055
0.408185	0	3587	0.0181378	0.000409326	-668.882	-2169.06						0.408185	0	3587	3.59754	-1.70858	240645	-93326		0.408185	0	3587	0.00318227	1.41054e-05	-320.49	175.473			0.408185	0	3587	0.0481358	-0.0062313	-53112.2	3673.15		0.408185	0	3587	0.0165365	0.00597661	65995.4	17901		0.408185	0	3587	0.520948	0.498197
0.490159	0	3589	0.122043	0.00151679	-351.208	-12180						0.490159	0	3589	1.19608	-1.70038	5304.73	882382		0.490159	0	3589	0.00124655	6.13093e-06	-81.8103	176.391			0.490159	0	3589	0.00590444	-0.000502772	-631.399	1378.2		0.490159	0	3589	0.00501276	-0.000455369	2370.54	-628.254		0.490159	0	3589	0.029132	-0.00379755
0.380335	0	3590	0.00999068	-0.000859807	309.376	-769.399						0.380335	0	3590	3.74673	2.54578	-36654.7	-142268		0.380335	0	3590	0.00199204	-2.00648e-05	280.672	179.04			0.380335	0	3590	0.00514405	-0.000833411	-797.03	1188.61		0.380335	0	3590	0.018066	0.00214093	-18149.8	9824.22		0.380335	0	3590	0.00861951	-0.0168243
0.462109	0	3598	0.120263	0.00229439	-967.019	-10361.8						0.462109	0	3598	0.0999983	0.00297772	21511.1	93883.4		0.462109	0	3598	0.00224956	0.000135918	502.985	-176.906			0.462109	0	3598	0.00416627	0.000335052	-355.696	-743.115		0.462109	0	3598	0.00286839	-9.97485e-05	-270.459	-1524.98		0.462109	0	3598	0.00795165	-0.0046875
0.428041	0	3599	0.10364	-0.00162382	1343.56	3028.16						0.428041	0	3599	0.666163	-1.22813	180189	129338		0.428041	0	3599	0.00215956	7.96305e-05	102.229	187.964			0.428041	0	3599	0.0083259	0.000407893	-222.172	-680.328		0.428041	0	3599	0.00286664	0.000517838	-638.765	-2184.12		0.428041	0	3599	0.0067329	0.00187498
0.377615	0	3606	0.0679757	0.00298003	1922.85	-6793.21						0.377615	0	3606	0.147191	-0.8462	30148.3	84817.6		0.377615	0	3606	0.00065411	0.000197699	-2.77295	-480.094			0.377615	0	3606	0.00327444	0.000291499	116.969	-442.085		0.377615	0	3606	0.018023	0.000581196	420.207	-169.886		0.377615	0	3606	0.00683468	0.00173997
0.457658	0	3609	0.105038	0.00240928	-881.421	-9818.75						0.457658	0	3609	1.35148	-1.69531	-397180	22138.3		0.457658	0	3609	0.00240966	-0.000180999	97.4036	330.657			0.457658	0	3609	0.00710967	-0.0016202	617.172	375.744		0.457658	0	3609	0.0199555	-0.00204095	4233.33	-3434.79		0.457658	0	3609	0.00842136	0.00028637
0.393814	0	3610	0.0703695	-0.00337348	48.7498	-833.756						0.393814	0	3610	0.728798	-0.0640905	0	-8842.45		0.393814	0	3610	0.000208275	-0.000167115	-281.101	115.93			0.393814	0	3610	0.00176771	-0.000321732	-834.686	747.072		0.393814	0	3610	0.0178223	-0.000262407	-1014.54	989.614		0.393814	0	3610	0.0114686	0.00327981
0.381028	0	3617	0.104186	-0.0119096	1046.46	-4504.83						0.381028	0	3617	0.0428252	-0.0106817	-27542.5	-27523.2		0.381028	0	3617	0.00201565	-0.00114777	468.314	-69.7084			0.381028	0	3617	0.00250912	0.000238227	-247.612	717.854		0.381028	0	3617	0.00527963	0.000399919	-321.645	454.466		0.381028	0	3617	0.00460101	0.00693961
0.358874	0	3618	0.0554685	-0.00285103	-486.112	-5014.75						0.358874	0	3618	0.104823	-0.00931536	62296	-12824.1		0.358874	0	3618	0.00191286	0.000628704	-296.47	539.757			0.358874	0	3618	0.00265978	0.00138466	-450.608	1390.98		0.358874	0	3618	0.0043932	-0.000983534	-366.841	-1903.34		0.358874	0	3618	0.0127748	-0.0128104
0.370333	0	3626	0.0639954	0.00131596	383.083	-1862.27						0.370333	0	3626	0.0657086	-0.035005	-18935.1	-70165.5		0.370333	0	3626	0.00135403	0.00165616	-242.208	142.694			0.370333	0	3626	0.00147529	0.000310208	247.74	-289.517		0.370333	0	3626	0.00285191	-0.00156665	-2948.25	-967.185		0.370333	0	3626	0.00862329	0.00597889
0.490565	0	3643	0.00895046	0.000632786	-478.89	-699.543						0.490565	0	3643	0.0228862	0.00922532	24298.7	-10754.5		0.490565	0	3643	0.000287341	-6.3609e-06	-22.6967	82.8799			0.490565	0	3643	0.000320368	8.95716e-05	260.213	-205.286		0.490565	0	3643	0.00232575	0.000273912	800.874	52.7903		0.490565	0	3643	0.000392011	3.8738e-05
0.338138	0	3652	0.0302355	-0.000298047	571.939	-698.01						0.338138	0	3652	0.109189	-0.0255752	15458.4	-35883.4		0.338138	0	3652	0.000194638	-0.000152137	174.277	-22.2595			0.338138	0	3652	0.0034551	-4.27104e-05	-229.586	-412.333		0.338138	0	3652	0.0028038	0.00060436	3108.36	1731.1		0.338138	0	3652	0.00733916	0.00123396
0.407548	0	3658	0.0219814	-0.00137687	-573.065	7172.53						0.407548	0	3658	0.0696786	-0.165064	149096	-190745		0.407548	0	3658	0.00165849	6.57988e-05	78.265	-44.3688			0.407548	0	3658	0.00133937	4.48218e-05	653.144	686.967		0.407548	0	3658	0.00874673	-0.000427201	1107.05	211.106		0.407548	0	3658	0.00283904	-0.000755868
0.358035	0	3669	0.0271577	6.79478e-05	-327.32	191.033						0.358035	0	3669	6.11442	4.57037	0	-7308.7		0.358035	0	3669	0.00854611	-0.0033253	468.545	687.615			0.358035	0	3669	0.190969	0.346014	-0.163006	-7309.22		0.358035	0	3669	2.64463	-4.7314	-38139	39058.8		0.358035	0	3669	2.68738	-1.58558
0.440147	0	3679	0.0536728	2.48586e-05	914.418	182.018						0.440147	0	3679	0.0747327	-0.184205	92049.9	54024.1		0.440147	0	3679	0.00226441	-4.3549e-05	-153.829	-120.659			0.440147	0	3679	0.00511814	-8.15146e-05	-128.754	377.802		0.440147	0	3679	0.013724	0.000789696	2933.63	-764.744		0.440147	0	3679	0.0121388	-5.38659e-05
0.374279	0	3680	0.0294785	0.0013084	-1043.15	-3076.03						0.374279	0	3680	3.2581	-0.977185	113915	-96248.6		0.374279	0	3680	0.00442423	3.95498e-05	87.8746	-251.753			0.374279	0	3680	0.00611426	-0.000408319	-287.858	408.535		0.374279	0	3680	0.00999702	-0.00362725	-901.891	2971.42		0.374279	0	3680	0.0545596	-0.0195583
0.495957	0	3685	0.0156815	-0.00132439	4488.1	3571.05						0.495957	0	3685	1.40478	0.473923	130420	47821.4		0.495957	0	3685	0.000606636	0.000157796	-204.706	-263.016			0.495957	0	3685	0.0024389	0.000701819	357.188	-919.924		0.495957	0	3685	0.0147139	-0.000304612	-6911.58	-1336.4		0.495957	0	3685	0.0325489	-0.0011099
0.442043	0	3711	0.0121143	-0.00119088	2318.33	-251.649						0.442043	0	3711	0.509528	-0.568233	236347	-218511		0.442043	0	3711	0.000725949	1.80052e-06	21.7414	37.4936			0.442043	0	3711	0.00127329	-0.000528355	920.188	-919.505		0.442043	0	3711	0.0113345	-0.00146331	-3531.35	3676.63		0.442043	0	3711	0.0190034	-0.00547502
0.47354	0	3717	0.0774795	-0.000184073	-1490.22	3468.26						0.47354	0	3717	0.960764	0.31386	92624.5	-3590.9		0.47354	0	3717	0.00128657	0.000133191	-114.99	-526.905			0.47354	0	3717	0.0032604	-0.00097301	-688.016	1318.91		0.47354	0	3717	0.00777318	0.00259044	456.863	-4618.26		0.47354	0	3717	0.0111684	-0.000938028
0.323882	0	3718	0.0401048	-0.000905826	86.3402	345.349						0.323882	0	3718	0.084241	0.00457401	-44149.7	55212.5		0.323882	0	3718	0.000973777	-0.000174476	45.1236	158.519			0.323882	0	3718	0.00241017	0.000190812	84.4599	-586.577		0.323882	0	3718	0.0112308	0.000123767	-222.952	-915.674		0.323882	0	3718	0.00765495	-4.52259e-05
0.300105	0	3726	0.0663755	-0.00196621	-373.559	36.1702						0.300105	0	3726	0.13571	0.06995	-73541.9	19809.3		0.300105	0	3726	0.000633963	2.1911e-05	165.183	-49.3408			0.300105	0	3726	0.00139958	-0.000404479	-35.4717	-151.514		0.300105	0	3726	0.0177412	0.00191525	-1250.43	1973.77		0.300105	0	3726	0.00465265	0.000327199
0.463282	0	3734	0.00974636	0.00401716	-3182.92	6990.47						0.463282	0	3734	0.0126312	0.000295006	3029.05	599.196		0.463282	0	3734	0.00184676	-2.07612e-06	-92.3262	24.0728			0.463282	0	3734	0.00222708	-6.86474e-05	-1011.67	-236.536		0.463282	0	3734	0.000879089	0.000234344	-1774.15	92.7802		0.463282	0	3734	0.00381045	-0.000167874
0.339834	0	3750	0.0203821	0.00115065	495.945	-469.062						0.339834	0	3750	0.0339467	-0.00907444	-4889.61	17518.5		0.339834	0	3750	0.000748399	-4.24329e-05	5.54061	50.5753			0.339834	0	3750	0.000242672	-6.04967e-05	-38.749	96.3868		0.339834	0	3750	0.00164162	0.000125212	-678.742	577.557		0.339834	0	3750	0.00389814	-0.0004603
0.432045	0	3757	0.0447	4.59245e-05	-3266.73	-1335.21						0.432045	0	3757	0.0115506	0.000329409	188.098	-4313.37		0.432045	0	3757	0.00124789	-9.66881e-05	-142.764	-306.48			0.432045	0	3757	0.00408728	0.000106128	-555.964	-992.546		0.432045	0	3757	0.0106099	5.12335e-05	-761.317	432.147		0.432045	0	3757	0.00425701	-5.4685e-05
0.40366	0	3758	0.0360053	-0.000768269	-1972.52	-3925.73						0.40366	0	3758	3.72946	-1.52956	94016.9	237222		0.40366	0	3758	0.00491844	0.000391682	-321.655	-828.835			0.40366	0	3758	0.00700708	-0.00156172	452.716	-4577.97		0.40366	0	3758	0.0108876	0.00998317	3521.55	-8153.64		0.40366	0	3758	0.0955346	0.135657
0.491149	0	3759	0.0352265	0.00137422	434.372	-1107.93						0.491149	0	3759	0.0454561	-0.0031334	22479.5	-58393.2		0.491149	0	3759	0.00118514	-7.8929e-05	-1148.78	-471.621			0.491149	0	3759	0.000679959	0.000159691	1147.38	-118.002		0.491149	0	3759	0.00421958	0.000614418	-0.185017	-762.14		0.491149	0	3759	0.0088589	-0.000247744
0.380696	0	3760	0.028308	-0.00224431	266.011	3883.17						0.380696	0	3760	2.43327	0.674728	-28462.9	84635.5		0.380696	0	3760	0.00224153	-0.000157942	-129.982	247.184			0.380696	0	3760	0.0146779	0.00283299	-1570.95	223.678		0.380696	0	3760	0.0180734	0.00182174	4312.35	808.74		0.380696	0	3760	0.015473	-0.0149786
0.359559	0	3763	0.101233	-0.00183742	-509.817	-1492.19						0.359559	0	3763	1.17388	-0.905476	64442	-1621.16		0.359559	0	3763	0.00264309	8.78753e-05	143.339	442.179			0.359559	0	3763	0.0101846	-0.000553573	197.312	327.354		0.359559	0	3763	0.0230489	-0.0012439	1041.82	-268.442		0.359559	0	3763	0.00434762	-0.000531413
0.43191	0	3775	0.0871023	0.00644601	-313.339	5168.53						0.43191	0	3775	0.0765992	0.112147	410405	-43012.2		0.43191	0	3775	0.00229365	-0.000185652	-110.274	5.73762			0.43191	0	3775	0.00390977	-0.000564592	-194.348	77.5869		0.43191	0	3775	0.00657538	0.000198416	-1819.43	-220.244		0.43191	0	3775	0.0127339	-0.000172909
0.345564	0	3795	0.0316705	0.000794006	370.442	6.17275						0.345564	0	3795	0.0164791	-0.00758236	10864.6	-11226.8		0.345564	0	3795	0.000406534	0.000172652	-41.2216	-64.5479			0.345564	0	3795	0.00422296	-7.09296e-05	-115.714	76.9628		0.345564	0	3795	0.00337737	0.00110171	-66.2257	-1751.37		0.345564	0	3795	0.0105021	0.000963812
0.373397	0	3798	0.0124401	0.00224828	76.8973	-3294.51						0.373397	0	3798	2.43654	2.05126	120894	135242		0.373397	0	3798	0.00127972	-4.72492e-05	-710.291	269.052			0.373397	0	3798	0.00642494	2.21934e-05	954.485	-633.685		0.373397	0	3798	0.0256558	0.00356627	6548.72	-4819.82		0.373397	0	3798	0.0251411	0.00400279
0.483761	0	3799	0.0224073	0.000515399	54.3414	1286.13						0.483761	0	3799	2.2292	-1.14519	-5530.35	94312.8		0.483761	0	3799	0.0034639	-0.000317744	55.2861	839.994			0.483761	0	3799	0.0859939	-0.0503265	-61491.9	-35752.9		0.483761	0	3799	1.33668	-0.666756	30092.4	122969		0.483761	0	3799	0.561135	-0.944055
0.443398	0	3800	0.0217551	0.0048162	-1454.17	10829.9						0.443398	0	3800	0.0210661	0.0112718	18631.8	-2193.4		0.443398	0	3800	0.00113503	0.000250743	-137.608	-303.299			0.443398	0	3800	0.00349004	-7.71011e-05	775.914	-146.233		0.443398	0	3800	0.011701	0.00109132	-770.412	364.641		0.443398	0	3800	0.00308958	0.00110827
0.409604	0	3804	0.066453	0.000444096	633.252	1120.26						0.409604	0	3804	0.112044	-0.457257	19972.9	-74383.8		0.409604	0	3804	0.00177321	0.000179895	-64.957	-118.016			0.409604	0	3804	0.00485254	-0.000181639	509.257	206.303		0.409604	0	3804	0.00974293	0.000230251	-1331.09	-2005.94		0.409604	0	3804	0.0116891	0.000506994
0.494196	0	3811	0.0789559	-0.00538505	-8302.77	-7713.93						0.494196	0	3811	0.387999	-1.01149	-479323	-135559		0.494196	0	3811	0.000535943	-0.000244302	38.4953	547.078			0.494196	0	3811	0.00370767	-0.000115016	-262.528	83.8122		0.494196	0	3811	0.0142095	0.00132928	-3236.66	1038.19		0.494196	0	3811	0.0140566	-0.000164354
0.436011	0	3813	0.00862294	-0.000551112	-866.189	4765.51						0.436011	0	3813	0.0678071	0.0150573	13024.1	16360.1		0.436011	0	3813	0.000799068	2.50553e-05	-125.594	47.0538			0.436011	0	3813	0.000152736	-3.12458e-05	111.537	425.786		0.436011	0	3813	0.00710102	-4.23517e-05	-204.139	-109.049		0.436011	0	3813	0.00230762	-0.000136559
0.391637	0	3836	0.0472318	0.00142273	-77.4941	99.9874						0.391637	0	3836	0.0488398	0.065638	-78037.1	-78766		0.391637	0	3836	0.000742719	7.31022e-05	71.6373	4.95844			0.391637	0	3836	0.00212716	-0.000236239	390.892	-582.946		0.391637	0	3836	0.0115379	0.000297077	-765.101	-3018.94		0.391637	0	3836	0.003656	-0.000115476
0.334828	0	3841	0.0969503	0.00697205	-742.313	-5829.13						0.334828	0	3841	0.765853	2.00637	141564	213205		0.334828	0	3841	0.00413878	0.00020481	-31.9057	-459.696			0.334828	0	3841	0.00299121	9.02219e-05	243.246	276.534		0.334828	0	3841	0.00993899	0.0036533	-430.047	-1487.61		0.334828	0	3841	0.0247073	-0.000916459
0.464273	0	3848	0.0245447	0.000107192	870.765	-901.213						0.464273	0	3848	0.0433576	-0.00202477	4865.88	-23550.2		0.464273	0	3848	0.000994278	4.64825e-05	-168.053	-56.1217			0.464273	0	3848	0.00109269	-0.00016322	519.516	145.431		0.464273	0	3848	0.00777141	0.000227572	973.274	-584.897		0.464273	0	3848	0.00275349	-0.000395781
0.449088	0	3850	0.0069534	0.000531769	-724.89	5651.18						0.449088	0	3850	0.0318611	0.00256609	16184.8	-11443.5		0.449088	0	3850	0.000762518	2.93005e-05	93.0626	-123.831			0.449088	0	3850	0.00110622	2.23333e-05	-237.489	-2.75598		0.449088	0	3850	0.00322175	0.000148656	-186.965	531.822		0.449088	0	3850	0.00288131	-3.03095e-05
0.36653	0	3852	0.0620443	-0.00204739	-780.56	-113.525						0.36653	0	3852	0.142419	-0.0728371	-32532	18332		0.36653	0	3852	0.0011706	3.81481e-05	65.6068	-101.831			0.36653	0	3852	0.00909856	0.000627167	-307.474	-498.373		0.36653	0	3852	0.0183107	-0.00121833	-180.026	-207.211		0.36653	0	3852	0.00963919	0.000306433
0.462822	0	3863	0.0393827	-0.0390124	-12.4905	-158.755						0.462822	0	3863	0.0359243	0.00836408	-31473.9	57011.8		0.462822	0	3863	0.000262749	6.17142e-05	156.209	-146.855			0.462822	0	3863	0.000729331	-0.000167595	333.893	170.141		0.462822	0	3863	0.00189259	-5.53697e-05	1029.82	388.699		0.462822	0	3863	0.00280505	0.0010843
0.353446	0	3869	0.0387356	-0.00576295	-1249.6	-2592.35						0.353446	0	3869	3.26542	4.21421	79498.7	157872		0.353446	0	3869	0.00513165	-0.000148687	352.226	-141.566			0.353446	0	3869	0.00836988	7.04404e-05	963.969	-2031.39		0.353446	0	3869	0.0150305	0.0105899	-8564.32	14066		0.353446	0	3869	0.0208395	0.0468403
0.311411	0	3878	0.0670906	0.00342638	278.456	-4548.23						0.311411	0	3878	0.359132	0.309724	-50884.7	60480.2		0.311411	0	3878	0.000875502	7.2846e-05	155.623	-245.988			0.311411	0	3878	0.00399756	0.00020394	-217.416	-279.124		0.311411	0	3878	0.0109856	-0.000215704	-1585.05	429.381		0.311411	0	3878	0.00472143	0.026353
0.464854	0	3882	0.0351296	0.000137887	930.755	1910.01						0.464854	0	3882	0.0525791	-0.0110512	-26027.4	-40959.1		0.464854	0	3882	0.00120542	-0.000228804	268.901	413.213			0.464854	0	3882	0.00205283	8.22469e-05	300.241	223.299		0.464854	0	3882	0.00304821	0.000110688	28.7186	-4.04897		0.464854	0	3882	0.00369722	-0.00118736
0.429053	0	3884	0.135344	0.00115844	2669.33	-7087.61						0.429053	0	3884	1.35806	1.12091	70411.9	-35398.5		0.429053	0	3884	0.000537592	4.35093e-05	134.705	362.183			0.429053	0	3884	0.00445614	0.000533121	-1015.71	-790.683		0.429053	0	3884	0.00613437	-0.00256517	1696.26	470.849		0.429053	0	3884	0.0193811	0.000729318
0.389067	0	3900	0.0521642	-0.00336809	-852.997	-175.558						0.389067	0	3900	0.0607283	-0.0128075	5362.09	589.494		0.389067	0	3900	0.000274465	-6.4833e-05	-240.54	44.6852			0.389067	0	3900	0.00186225	-7.52638e-05	-789.609	415.02		0.389067	0	3900	0.0137463	-0.000396264	-740.517	877.456		0.389067	0	3900	0.0119423	-0.00104666
0.435946	0	3909	0.0351378	-0.00124922	-2238.03	-4443.67						0.435946	0	3909	4.2043	-0.610799	-153377	-216689		0.435946	0	3909	0.00519426	0.000253233	-246.645	-890.616			0.435946	0	3909	0.00811805	-0.00144062	-2356.31	-1140.49		0.435946	0	3909	0.014518	-0.00868434	-1520.61	-2713.68		0.435946	0	3909	0.0809656	-0.00526243
0.30189	0	3919	0.119801	-0.00348138	-35.6444	-3894.91						0.30189	0	3919	0.441425	-1.16982	0	-5196.24		0.30189	0	3919	0.00147788	4.10824e-05	194.324	-159.88			0.30189	0	3919	0.00385036	0.000401943	-243.142	-403.681		0.30189	0	3919	0.00575003	0.00891116	-2157.19	495.366		0.30189	0	3919	0.00812697	-0.00604114
0.349033	0	3934	0.0216473	0.00122109	-1692.48	6592.48						0.349033	0	3934	0.0187894	0.0145961	3508.75	-2849		0.349033	0	3934	0.000542994	-0.00039238	-124.357	74.6623			0.349033	0	3934	0.00385666	0.000319812	-16.1508	-129.673		0.349033	0	3934	0.0129024	0.000887978	-283.594	-447.936		0.349033	0	3934	0.000505517	-0.00131606
0.415415	0	3940	0.13993	0.0189901	-260.761	-10352						0.415415	0	3940	0.869516	-0.806353	199374	39915.4		0.415415	0	3940	0.00182606	0.000427228	302.427	-471.988			0.415415	0	3940	0.00556746	0.000170381	707.813	384.967		0.415415	0	3940	0.00439873	0.00802148	-869.513	-1018.72		0.415415	0	3940	0.0179093	-0.010439
0.372394	0	3944	0.0695955	-0.000316945	621.281	931.67						0.372394	0	3944	0.070514	0.0963181	-26677.8	43478.5		0.372394	0	3944	0.000382033	0.000101695	-89.2168	-148.362			0.372394	0	3944	0.00633145	-0.000173041	-87.2091	327.049		0.372394	0	3944	0.00952484	0.000475574	-148.758	-2592.97		0.372394	0	3944	0.0130174	0.000284502
0.470376	0	3945	0.00647288	0.000904496	1514.29	-943.463						0.470376	0	3945	3.69198	-2.24114	-40688.3	-223548		0.470376	0	3945	0.00179522	-3.09386e-05	107.255	526.195			0.470376	0	3945	0.0391022	-0.00913464	59863.3	30190.7		0.470376	0	3945	0.0182968	0.0034975	-7392.75	45355.6		0.470376	0	3945	0.0190876	-0.00771629
0.408462	0	3959	0.02818	0.00439511	-749.857	1779.41						0.408462	0	3959	0.0401853	0.00979912	-2935.05	5973.65		0.408462	0	3959	0.000711467	-7.63154e-05	-100.078	66.8209			0.408462	0	3959	0.00133889	-1.09548e-05	324.185	-102.438		0.408462	0	3959	0.00187955	3.558e-05	428.065	863.306		0.408462	0	3959	0.00472969	-0.000922326
0.380522	0	3961	0.024065	0.00230479	630.406	-300.204						0.380522	0	3961	0.0147607	0.0490999	-11104.8	-12377.8		0.380522	0	3961	0.000391143	-2.97585e-05	-16.9644	67.1941			0.380522	0	3961	0.00225063	0.000131065	-307.154	-110.1		0.380522	0	3961	0.00767965	0.00117988	851.525	-1694.48		0.380522	0	3961	0.00450112	0.000498605
0.453562	0	3964	0.143342	-0.0121614	-1298.83	-10852.1						0.453562	0	3964	0.49528	-0.688273	-16624.8	188526		0.453562	0	3964	0.000665732	-3.04589e-05	403.045	-380.422			0.453562	0	3964	0.00543773	0.00036104	102.705	-246.656		0.453562	0	3964	0.0078546	-0.00249836	-4535.67	991.676		0.453562	0	3964	0.0106368	-4.78041e-05
0.333055	0	3965	0.0245756	0.00188246	1401.83	-3319.4						0.333055	0	3965	0.0400281	0.00102716	-5690.47	-5472.29		0.333055	0	3965	0.000824377	0.000127407	22.4311	-158.672			0.333055	0	3965	0.00695862	9.64992e-05	222.41	555.254		0.333055	0	3965	0.0097115	-0.00020231	-704.963	-180.331		0.333055	0	3965	0.00133318	-0.000477711
0.454419	0	3971	0.0142534	0.00112398	-1760.73	12217.8						0.454419	0	3971	0.00270749	-0.00427692	-119.124	21217.1		0.454419	0	3971	0.00171165	-0.000142622	-267.027	-87.5537			0.454419	0	3971	0.000900818	7.77913e-05	223.721	-151.327		0.454419	0	3971	0.00987629	8.31663e-05	454.088	317.888		0.454419	0	3971	0.000563322	-2.74868e-05
0.452261	0	3972	0.0553716	0.00453968	-550.177	-9541.42						0.452261	0	3972	0.563861	0.50592	30773.7	78036.6		0.452261	0	3972	0.00373217	-0.000228252	-322.705	-306.407			0.452261	0	3972	0.000267162	-0.000458497	559.836	402.168		0.452261	0	3972	0.00871912	0.00192887	-1266.12	-1231.42		0.452261	0	3972	0.0226454	-0.0011529
0.485318	0	3993	0.0326528	-0.00077646	-580.711	-913.836						0.485318	0	3993	1.70511	0.0902634	166680	2715.21		0.485318	0	3993	0.0429561	0.0814037	44569.8	-90687.7			0.485318	0	3993	2.26807	0.0521732	0	-13429		0.485318	0	3993	5.60408	2.26477	0	-13429		0.485318	0	3993	4.87435	-1.70896
0.381158	0	3997	0.0113925	-0.00071034	-260.078	-1231.44						0.381158	0	3997	0.0112991	0.000384886	796.172	-558.655		0.381158	0	3997	0.000283601	2.51873e-05	-7.37126	-65.0596			0.381158	0	3997	0.00191638	8.02808e-05	-13.0717	118.831		0.381158	0	3997	0.00408715	0.000160472	-19.383	-114.52		0.381158	0	3997	0.000599638	-3.91365e-05
0.301241	0	4002	0.0195786	-0.00132487	381.055	-1827.1						0.301241	0	4002	0.0261583	0.000359601	-1059.59	224.535		0.301241	0	4002	0.000472051	-9.23221e-05	-75.5324	15.1057			0.301241	0	4002	0.00388745	0.000188956	120.975	-91.3143		0.301241	0	4002	0.00820699	0.000255712	-11.6049	158.246		0.301241	0	4002	0.00174712	-9.1232e-05
0.301273	0	4007	0.0247328	0.000461201	454.523	-212.28						0.301273	0	4007	0.0565479	0.000732347	7985.72	-1452.21		0.301273	0	4007	0.000162169	0.000244818	-201.574	-84.2878			0.301273	0	4007	0.000743032	9.30805e-05	-38.9465	171.989		0.301273	0	4007	0.00598442	0.000692669	-145.407	-61.773		0.301273	0	4007	0.0041853	-0.0013441
0.35591	0	4012	0.0880855	0.00569221	-23.0415	-2676.62						0.35591	0	4012	0.112664	-0.0339724	30555.7	-49428.2		0.35591	0	4012	0.00106977	0.000257904	-440.845	22.7474			0.35591	0	4012	0.00198985	-0.000118991	315.776	572.093		0.35591	0	4012	0.00340276	-0.00191678	-258.958	-1751.24		0.35591	0	4012	0.0123419	0.00105659
0.470671	0	4015	0.109314	0.00042447	-1005.15	-11508						0.470671	0	4015	0.145924	0.267286	42529.4	37587.2		0.470671	0	4015	0.00317321	0.000135194	186.281	-354.21			0.470671	0	4015	0.00466121	-0.000307319	600.107	-449.982		0.470671	0	4015	0.00103802	-0.000450915	-468.034	722.679		0.470671	0	4015	0.01267	0.00864814
0.366834	0	4017	0.0133454	0.0015647	-183.535	1052.82						0.366834	0	4017	0.00253384	-0.000322476	-430.976	149.541		0.366834	0	4017	0.00081528	0.000101607	-29.2252	-32.2534			0.366834	0	4017	0.00134548	8.029e-05	-183.785	-125.95		0.366834	0	4017	0.00229002	0.000272657	-377.84	53.457		0.366834	0	4017	0.00171869	0.00026195
0.462448	0	4027	0.0165788	0.000633485	126.236	-3961.23						0.462448	0	4027	1.77139	-0.5193	189589	111580		0.462448	0	4027	0.00774839	0.000211197	459.524	50.4569			0.462448	0	4027	4.13834	1.05752	-61886.1	-50609.1		0.462448	0	4027	5.8107	1.2448	0	-12193.2		0.462448	0	4027	3.1902	0.327156
0.36704	0	4028	0.06342	-0.00810225	70.26	4603.03						0.36704	0	4028	0.0843356	-0.00229804	1444.18	-53346		0.36704	0	4028	0.00103881	3.92788e-05	-55.022	-50.4254			0.36704	0	4028	0.00539396	9.31619e-05	169.591	78.0318		0.36704	0	4028	0.00459143	4.69141e-05	-55.0397	1320.55		0.36704	0	4028	0.0080677	-0.000503713
0.357055	0	4040	0.0421304	0.000941124	854.71	-1418.11						0.357055	0	4040	0.0716374	-0.0151113	9189.83	-6747.58		0.357055	0	4040	0.000987685	-0.000205885	52.3676	145.118			0.357055	0	4040	0.00376029	1.51639e-05	-155.989	-340.727		0.357055	0	4040	0.00725235	-0.000191543	111.459	109.881		0.357055	0	4040	0.00461178	-0.000407368
0.402764	0	4053	0.0254078	-0.00190521	301.498	6431.06						0.402764	0	4053	0.0845382	0.00382902	12212.7	9146.53		0.402764	0	4053	0.000904607	-9.99788e-07	-23.4899	31.1864			0.402764	0	4053	0.00172738	0.00023998	430.102	397.159		0.402764	0	4053	0.0105393	8.48961e-05	294.724	45.0514		0.402764	0	4053	0.00111424	-9.23757e-05
0.453308	0	4056	0.0916379	0.00117531	1719.28	-287.199						0.453308	0	4056	0.238595	0.05612	32473	60254.4		0.453308	0	4056	0.00195146	-7.1656e-06	116.191	141.355			0.453308	0	4056	0.00637106	-0.000132114	107.044	-106.828		0.453308	0	4056	0.0149483	0.000552144	-1144.88	-1354.24		0.453308	0	4056	0.0187743	-0.000650683
0.373724	0	4062	0.0385809	0.00126181	-174.512	6036.47						0.373724	0	4062	0.0728083	-0.103566	66879.7	50345.1		0.373724	0	4062	0.000386756	-1.59266e-05	17.8435	19.8661			0.373724	0	4062	0.00381999	-0.000189039	424.477	-267.4		0.373724	0	4062	0.00322982	0.000262123	480.137	-92.4161		0.373724	0	4062	0.0125724	-0.000317657
0.349918	0	4067	0.0223527	0.00156979	-1053.94	3984.67						0.349918	0	4067	0.0708205	0.0339141	-47861.6	39155.7		0.349918	0	4067	0.0010695	0.0006571	-184.839	-24.4475			0.349918	0	4067	0.00165693	-0.000311084	-180.327	-72.5817		0.349918	0	4067	0.00455343	-0.000354274	148.818	976.372		0.349918	0	4067	0.00342402	0.000228969
0.468605	0	4101	0.0576149	0.00061722	2100.24	-973.832						0.468605	0	4101	0.581638	-1.21702	31492.4	88416.8		0.468605	0	4101	0.00254928	-5.40677e-05	-33.8064	-4.09769			0.468605	0	4101	0.00327277	0.000119606	-461.398	577.189		0.468605	0	4101	0.0107869	3.49693e-05	1987.62	-2047.13		0.468605	0	4101	0.00343805	-0.00119176
0.438553	0	4113	0.0915027	-0.00194129	-1902.76	-2292.56						0.438553	0	4113	0.517728	0.102599	-104988	130151		0.438553	0	4113	0.00229878	0.000314184	67.453	332.732			0.438553	0	4113	0.00932155	0.000819896	-1522.95	-2444.83		0.438553	0	4113	0.00501386	0.000630306	960.59	-758.072		0.438553	0	4113	0.0052384	0.000758467
0.453053	0	4116	0.0411363	-0.000734191	1321.9	-299.694						0.453053	0	4116	0.103701	0.0348967	17098	-67871.3		0.453053	0	4116	0.000220393	2.82455e-05	28.7434	-74.2927			0.453053	0	4116	0.00442756	0.000251461	-548.744	-247.924		0.453053	0	4116	0.0100116	0.00010969	3286.36	-4391.45		0.453053	0	4116	0.00829977	-0.000140798
0.310617	0	4127	0.110269	-0.000533079	-469.013	-2264.03						0.310617	0	4127	0.831452	0.155138	27497.3	-30606.7		0.310617	0	4127	0.0021962	0.000131626	42.1315	-95.0855			0.310617	0	4127	0.013486	-0.000586424	388.396	401.149		0.310617	0	4127	0.0200661	-0.00151614	-833.118	-998.185		0.310617	0	4127	0.0160001	0.00159273
0.317294	0	4135	0.0157209	0.000378516	-1043.89	3971.57						0.317294	0	4135	0.0295899	-0.00890393	9810.87	-18474.2		0.317294	0	4135	0.00091617	0.00017784	-55.3282	-115.304			0.317294	0	4135	0.00302762	-0.000162038	-26.7562	-70.382		0.317294	0	4135	0.000605937	0.000218011	-295.467	-257.07		0.317294	0	4135	0.00168119	3.06918e-06
0.300549	0	4144	0.0464398	-0.0031356	662.412	3181.42						0.300549	0	4144	2.66157	-3.83661	-140585	138564		0.300549	0	4144	0.000838959	5.13262e-06	-221.907	-41.6673			0.300549	0	4144	0.00998499	0.00144365	-5003.36	3184.66		0.300549	0	4144	0.0261987	-0.0247407	-4658.36	-6148.07		0.300549	0	4144	0.329613	-0.988447
0.361441	0	4151	0.107752	0.0013072	229.859	-1417.93						0.361441	0	4151	0.191141	-0.114404	0	-7448.46		0.361441	0	4151	0.000649263	-9.18634e-05	120.739	-42.213			0.361441	0	4151	0.0056553	-6.29889e-05	-33.7031	-191.786		0.361441	0	4151	0.0202499	0.0010281	-102.332	-824.82		0.361441	0	4151	0.0156672	-0.000662409
0.364998	0	4153	0.0127868	-0.00125995	1089.84	-2852.77						0.364998	0	4153	0.0225068	-0.000873771	-3613.25	-131.392		0.364998	0	4153	0.000497794	-2.48321e-05	-52.3153	63.7265			0.364998	0	4153	0.00218502	0.000281988	93.3454	-23.0415		0.364998	0	4153	0.00533729	0.000424359	-312.341	133.96		0.364998	0	4153	0.00186054	0.000189193
0.360234	0	4156	0.0554996	0.002275	1221.29	-3026.58						0.360234	0	4156	0.0712835	0.00730241	7814.79	21668.2		0.360234	0	4156	0.00261164	-0.00017896	51.2383	149.119			0.360234	0	4156	0.00388602	0.000309325	249.669	-95.7196		0.360234	0	4156	0.0121489	0.000192254	197.561	-98.1804		0.360234	0	4156	0.00267263	0.0070518
0.365172	0	4160	0.00204892	-0.0023412	-640.761	278.303						0.365172	0	4160	0.00264349	0.0018611	1724.31	-671.009		0.365172	0	4160	6.22513e-05	1.62746e-05	10.3102	2.23342			0.365172	0	4160	0.000144321	-0.000129853	11.8267	-39.5076		0.365172	0	4160	0.000430741	0.000184282	-10.199	62.7938		0.365172	0	4160	0.000713908	-0.000699926
0.415976	0	4164	0.102486	0.00562543	-193.039	-8380.83						0.415976	0	4164	0.615814	-0.233876	-499338	-297812		0.415976	0	4164	0.00195799	-0.000291006	-107.175	-399.645			0.415976	0	4164	0.00307409	-0.000646566	443.729	608.177		0.415976	0	4164	0.00484632	0.00077705	3041.18	-1369.51		0.415976	0	4164	0.0280591	-0.00301322
0.489305	0	4170	0.0175168	-0.000294458	-1364.22	986.256						0.489305	0	4170	5.48194	1.31915	0	-13650.6		0.489305	0	4170	0.00179232	-0.00100194	24.8445	-1547.87			0.489305	0	4170	0.0191311	-0.0140895	15477.5	-46763.5		0.489305	0	4170	0.0682877	0.00954621	-32646.6	160801		0.489305	0	4170	0.829947	-2.29421
0.449113	0	4173	0.105518	0.00111544	-1625.73	419.544						0.449113	0	4173	1.71528	-0.04462	-11236.6	-6660.34		0.449113	0	4173	0.000757214	-0.000415906	-33.6192	669.631			0.449113	0	4173	0.00712282	0.000378361	1640.59	647.015		0.449113	0	4173	0.0173733	0.000838484	381.674	-2680.83		0.449113	0	4173	0.0211469	0.00029224
0.495923	0	4178	0.000384083	0.000101766	-268.889	-29.7854						0.495923	0	4178	0.00164792	0.000680015	-1477.97	-4252.83		0.495923	0	4178	8.9849e-05	-6.36548e-06	-73.2519	-33.7277			0.495923	0	4178	0.000737875	-8.37668e-05	-23.3633	63.4036		0.495923	0	4178	0.000888399	-3.32584e-05	387.076	143.504		0.495923	0	4178	0.000615792	2.60071e-05
0.406953	0	4184	0.0654347	0.00209569	141.703	4423.06						0.406953	0	4184	0.0428595	-0.00970202	13681.5	-44262.2		0.406953	0	4184	0.00170559	0.000812754	-287.123	-94.0527			0.406953	0	4184	0.00432727	8.87656e-05	-516.914	334.399		0.406953	0	4184	0.00277496	0.0004415	-1830.75	-794.951		0.406953	0	4184	0.00983254	0.000846435
0.470509	0	4196	0.0621266	-0.00169386	-867.46	-384.707						0.470509	0	4196	0.0550348	-0.0576441	31231.7	25893		0.470509	0	4196	0.00141634	7.74696e-05	318.224	-5.00953			0.470509	0	4196	0.00749378	-0.000174219	647.287	243.957		0.470509	0	4196	0.0182262	-0.000514734	3997.77	-1920.75		0.470509	0	4196	0.0114226	0.00132511
0.464185	0	4197	0.000780365	-2.96259e-05	183.259	-281.614						0.464185	0	4197	0.000468301	0.00137523	-2821.28	-1323.8		0.464185	0	4197	8.4933e-05	8.57984e-06	-36.6845	-42.987			0.464185	0	4197	0.000542525	-8.98933e-05	-67.7668	-36.9749		0.464185	0	4197	0.00109931	-0.000187143	209.374	79.0283		0.464185	0	4197	0.000245303	6.28424e-06
0.339485	0	4203	0.0109981	0.00362722	1195.88	1763.21						0.339485	0	4203	0.0119422	0.00139369	-17782.2	4054.48		0.339485	0	4203	0.000110877	-1.84484e-05	18.0826	-4.23059			0.339485	0	4203	0.000431118	-0.00011811	-32.111	14.2959		0.339485	0	4203	0.00188054	0.000331864	243.565	-260.462		0.339485	0	4203	0.0008522	-5.33917e-05
0.360071	0	4220	0.00277744	-0.00131765	354.621	1910.85						0.360071	0	4220	0.00779005	0.00137627	-5849.24	-592.976		0.360071	0	4220	0.000300619	7.37828e-05	4.91132	29.9951			0.360071	0	4220	0.000802304	-0.000189759	28.5082	66.9217		0.360071	0	4220	0.000814873	2.16477e-05	-441.42	-372.005		0.360071	0	4220	0.00148183	-0.00053352
0.487397	0	4237	0.0757994	0.00437525	-550.337	-12491.3						0.487397	0	4237	0.484279	0.811523	-288292	-46006.4		0.487397	0	4237	0.00424597	-4.07033e-05	-204.449	-479.728			0.487397	0	4237	0.0020518	-4.85431e-05	1074.5	308.009		0.487397	0	4237	0.00745146	0.000774544	-603.691	1181.69		0.487397	0	4237	0.0210237	0.000179291
0.314203	0	4243	0.0436894	-0.00043622	1389.31	3136.04						0.314203	0	4243	0.0631363	0.033969	-8672.07	-5386.4		0.314203	0	4243	0.000265464	3.72596e-05	17.0724	114.814			0.314203	0	4243	0.00317046	1.49866e-05	-36.0291	-38.6856		0.314203	0	4243	0.00531387	0.000149022	432.948	-560.944		0.314203	0	4243	0.0113651	0.000310499
0.458025	0	4249	0.109048	0.00848057	-3257.89	-11182.5						0.458025	0	4249	1.5231	1.7165	-90379.9	49000.9		0.458025	0	4249	0.00225794	0.000511373	-589.602	-365.226			0.458025	0	4249	0.0057583	0.000517064	687.131	1325.32		0.458025	0	4249	0.00898872	-0.00179745	878.073	-1002.68		0.458025	0	4249	0.0222369	-0.00340188
0.416215	0	4257	0.0183555	1.64908e-05	271.055	-255.503						0.416215	0	4257	0.0796249	0.0140624	-9701.78	-16169.6		0.416215	0	4257	0.000611185	-5.48432e-05	91.6514	-51.1745			0.416215	0	4257	0.00157834	-0.000163341	-179.322	-166.059		0.416215	0	4257	0.00151611	-0.000508896	-1882.71	-282.868		0.416215	0	4257	0.00199518	0.000571069
0.470318	0	4260	0.0867788	0.000920981	737.555	-2680.52						0.470318	0	4260	1.59728	0.0222602	-301087	58215.5		0.470318	0	4260	0.00187172	-0.000147232	-444.528	438.622			0.470318	0	4260	0.0102718	0.000804215	-729.07	-518.618		0.470318	0	4260	0.0128372	0.000728523	-1585.06	559.619		0.470318	0	4260	0.00944421	-0.00204586
0.495409	0	4271	0.0185445	-0.00120036	214.613	8893.99						0.495409	0	4271	0.0256036	0.0125653	33255.1	-29751.8		0.495409	0	4271	0.000878723	-7.45042e-06	-144.989	76.1187			0.495409	0	4271	0.000770471	0.000176611	344.819	742.701		0.495409	0	4271	0.00996155	0.000232636	297.378	168.882		0.495409	0	4271	0.000937178	3.30672e-05
0.361956	0	4272	0.0514013	-0.00518527	1293.05	4398.32						0.361956	0	4272	2.23309	-0.585724	4472.88	43080.5		0.361956	0	4272	0.000820202	0.000186214	-208.045	-119.394			0.361956	0	4272	0.00833109	-0.00170809	649.31	-2871.6		0.361956	0	4272	0.0220231	0.00336591	-6898.69	5115.96		0.361956	0	4272	0.0171582	0.028891
0.345129	0	4274	0.0337771	-0.00328468	282.536	2336.29						0.345129	0	4274	0.0126131	0.0156888	23761.5	15343.8		0.345129	0	4274	0.000773032	3.06894e-05	22.7239	15.1653			0.345129	0	4274	0.00287392	-0.000226857	117.474	243.7		0.345129	0	4274	0.00233827	7.10966e-05	472.024	-240.502		0.345129	0	4274	0.00564766	9.19989e-05
0.369472	0	4281	0.10708	-0.000668506	-8.43281	-1880.03						0.369472	0	4281	1.64592	0.151724	33278	85626.9		0.369472	0	4281	0.00134957	-0.000419773	255.202	87.717			0.369472	0	4281	0.00855292	0.000278992	-801.338	76.8948		0.369472	0	4281	0.00207546	0.00240951	3680.06	532.72		0.369472	0	4281	0.00404933	0.000561373
0.349217	0	4288	0.0205632	0.00320313	341.226	-5092.79						0.349217	0	4288	0.0582434	-0.00765362	-13489.4	26883.6		0.349217	0	4288	0.0018492	4.02047e-05	-94.4906	-183.854			0.349217	0	4288	0.002148	-0.000396714	102.503	328.871		0.349217	0	4288	0.00236168	0.000641442	302.188	-425.673		0.349217	0	4288	0.0105235	-0.00353774
0.323972	0	4301	0.0734385	-0.00274871	-1922.24	-2343.26						0.323972	0	4301	0.437627	0.568723	58527.9	-2625.58		0.323972	0	4301	0.00140165	-0.00013556	-146.194	50.7824			0.323972	0	4301	0.00306336	-0.000166348	-3.8762	368.614		0.323972	0	4301	0.0137967	-0.000819133	-66.4049	401.084		0.323972	0	4301	0.0110871	-7.81174e-05
0.305848	0	4302	0.0113463	-0.00058355	-65.2063	-696.283						0.305848	0	4302	5.14663	0.767282	-1931.54	-23522.9		0.305848	0	4302	0.00143439	6.05082e-05	254.005	-141.507			0.305848	0	4302	0.00772123	-0.00078404	-604.439	408.218		0.305848	0	4302	0.00369998	0.00567654	-4976.8	586.699		0.305848	0	4302	0.0188566	0.00526253
0.421986	0	4305	0.0190928	0.00112648	-221.015	-2724.05						0.421986	0	4305	1.9332	-0.0642805	-227826	-93909		0.421986	0	4305	0.00276971	-0.000211377	-201.531	1036.23			0.421986	0	4305	2.52785	-2.70105	0	-10152.8		0.421986	0	4305	5.19349	-0.11543	0	-10152.8		0.421986	0	4305	2.39207	-0.370887
0.371331	0	4311	0.0722447	-0.00215191	-649.608	-1034.5						0.371331	0	4311	0.194811	-0.0169138	-15008	24356.1		0.371331	0	4311	0.00134851	4.24207e-05	-229.002	51.8821			0.371331	0	4311	0.00276063	-0.000250371	679.9	-818.144		0.371331	0	4311	0.00779973	0.00023593	-95.7613	455.926		0.371331	0	4311	0.013303	-0.000613447
0.445782	0	4312	0.0259197	0.000322294	-2546.57	-5747.64						0.445782	0	4312	3.35841	-1.31402	-103048	-259537		0.445782	0	4312	0.0040482	0.000372953	-1128.89	-69.9642			0.445782	0	4312	0.000873974	-0.000359915	2029.82	346.634		0.445782	0	4312	0.0204476	-0.00173446	-618.687	1457.88		0.445782	0	4312	0.836357	-0.42365
0.34916	0	4314	0.00627944	0.00897318	-63.116	852.737						0.34916	0	4314	0.0185059	0.145867	-25111.8	-64874		0.34916	0	4314	0.000176356	0.000114157	-41.2328	13.7634			0.34916	0	4314	0.00139793	-0.00012386	479.071	78.18		0.34916	0	4314	0.00115504	-0.000565255	696.205	-236.186		0.34916	0	4314	0.00600509	0.00585226
0.346809	0	4319	0.0684828	-0.024852	-1023.18	-3204.36						0.346809	0	4319	0.109872	-0.022774	4200.59	-17801.2		0.346809	0	4319	0.00178059	-2.48171e-05	-102.006	-163.851			0.346809	0	4319	0.00257748	-0.000120701	59.9438	-648.333		0.346809	0	4319	0.00432503	0.000743078	1300.25	323.736		0.346809	0	4319	0.00592311	0.00169146
0.48096	0	4325	0.0165942	4.27219e-05	-30.2319	9950.98						0.48096	0	4325	0.034404	-0.0446572	-50599.4	34566.7		0.48096	0	4325	0.00141231	4.58681e-05	102.832	-37.2347			0.48096	0	4325	0.00109445	-0.000165063	79.518	-254.806		0.48096	0	4325	0.00628644	9.06992e-05	2612.43	385.262		0.48096	0	4325	0.00697343	-0.000402903
0.436557	0	4328	0.00784005	-0.00147579	-1672.96	755.741						0.436557	0	4328	0.00918345	0.000979039	259.121	-1885.49		0.436557	0	4328	0.00028827	-5.66299e-05	69.2342	62.1773			0.436557	0	4328	0.000682097	-2.30339e-05	224.927	-128.041		0.436557	0	4328	0.00150028	-2.74882e-05	288.466	423.002		0.436557	0	4328	0.00188079	-0.000109369
0.400861	0	4349	0.0568644	-0.00235926	-787.584	-383.699						0.400861	0	4349	0.069984	-0.00728486	-4669.36	56856		0.400861	0	4349	0.000528299	-1.56661e-06	-297.159	75.3277			0.400861	0	4349	0.00178623	-0.000100708	-880.252	494.146		0.400861	0	4349	0.0142882	-0.000531416	-612.148	898.773		0.400861	0	4349	0.0111871	0.000224296
0.477977	0	4350	0.0386202	0.00353481	-2583.29	-1688.55						0.477977	0	4350	0.0225547	-0.0435952	-9480.26	5714.48		0.477977	0	4350	0.00167225	-6.18969e-06	-90.3504	157.082			0.477977	0	4350	0.00160542	-0.000560947	-399.172	736.072		0.477977	0	4350	0.0101042	5.53154e-05	232.142	428.636		0.477977	0	4350	0.0132227	0.000452509
0.388217	0	4360	0.017482	0.00142575	812.709	-3392.06						0.388217	0	4360	5.40161	-2.04971	280312	193085		0.388217	0	4360	0.00355712	-3.41945e-05	-5.10765	46.1037			0.388217	0	4360	0.0107645	0.00037644	-1641.99	-971.691		0.388217	0	4360	0.0140778	0.017633	-10132	3395.11		0.388217	0	4360	0.056755	0.0564068
0.35031	0	4371	0.0560316	-0.000355612	-200.623	-164.314						0.35031	0	4371	0.0818839	0.00746708	37114.6	25391.7		0.35031	0	4371	0.000388515	-0.000245381	-41.5809	312.352			0.35031	0	4371	0.00108841	0.000106167	468.741	363.956		0.35031	0	4371	0.0110722	3.58034e-07	331.994	-1064.22		0.35031	0	4371	0.00156884	-3.00726e-05
0.336022	0	4399	0.0155485	-0.00383248	63.2482	-2126.85						0.336022	0	4399	1.47379	-0.327432	-184316	-364776		0.336022	0	4399	0.00698832	0.000152686	-415.392	345.261			0.336022	0	4399	3.40723	2.65392	0	-6437.61		0.336022	0	4399	5.06685	-3.42064	0	-6437.61		0.336022	0	4399	2.5986	-0.403546
0.470301	0	4402	0.0565554	-0.000589634	823.335	7694.35						0.470301	0	4402	0.0152743	0.00907697	-48947.2	-9102.68		0.470301	0	4402	0.000311044	6.50159e-05	54.8278	39.1041			0.470301	0	4402	0.00349889	-0.000248928	-234.629	18.3272		0.470301	0	4402	0.00388698	-0.00050014	1121.65	-311.921		0.470301	0	4402	0.0107615	0.00067564
0.45674	0	4403	0.127935	0.00100501	1669.05	-4039.09						0.45674	0	4403	0.243588	0.45295	-73911.1	-71282.7		0.45674	0	4403	6.74877e-05	-3.72702e-05	49.5986	250.454			0.45674	0	4403	0.004048	0.000306171	-726.213	-1258.01		0.45674	0	4403	0.00520676	-0.000493228	-1061.18	-682.349		0.45674	0	4403	0.0107382	-0.00121275
0.367376	0	4412	0.0245364	-0.000639458	868.071	-592.626						0.367376	0	4412	0.0412689	0.0019497	24269.1	4212.95		0.367376	0	4412	0.00082622	4.43624e-05	-83.1043	165.537			0.367376	0	4412	0.000379212	-3.63795e-05	-31.1019	172.798		0.367376	0	4412	0.00188955	-0.000169138	124.471	53.2904		0.367376	0	4412	0.00348907	-0.00136013
0.383746	0	4418	0.0812963	-0.000317019	-419.825	3925.24						0.383746	0	4418	0.116706	0.0147139	33710.7	-63036		0.383746	0	4418	0.00199393	-0.00134779	604.62	73.5235			0.383746	0	4418	0.00599973	0.000131358	669.765	-88.7707		0.383746	0	4418	0.00538927	0.00216615	-127.369	910.758		0.383746	0	4418	0.00802993	0.000834858
0.464566	0	4419	0.0189284	0.000637093	-753.375	-3015.9						0.464566	0	4419	2.25073	-0.885983	-827.919	-54052.7		0.464566	0	4419	0.00569468	0.000275182	-287.964	-775.698			0.464566	0	4419	0.0876885	0.0937822	-301.728	85525.8		0.464566	0	4419	0.433086	-0.484347	19606.8	17405.6		0.464566	0	4419	1.27734	1.16906
0.358961	0	4428	0.112254	-0.00129491	1332.61	-478.057						0.358961	0	4428	1.13109	-1.19585	112387	-172376		0.358961	0	4428	0.00173926	0.000314731	-107.576	-149.459			0.358961	0	4428	0.0143102	0.000475331	547.003	-741.417		0.358961	0	4428	0.00740918	-0.00368276	-1698.97	1896.39		0.358961	0	4428	0.00748805	0.00119064
0.440691	0	4430	0.0553771	6.00224e-05	416.292	-1741.38						0.440691	0	4430	0.0172068	0.0408901	24667.1	-76934.8		0.440691	0	4430	0.000298209	0.000171527	66.0815	-326.592			0.440691	0	4430	0.00421224	-0.00021794	-1118.67	557.731		0.440691	0	4430	0.0124445	-0.000583831	1137.16	885.636		0.440691	0	4430	0.00792245	0.000544695
0.314488	0	4435	0.0332655	-0.00153552	-524.171	-1963.57						0.314488	0	4435	0.010705	0.000797256	2252.44	2809.02		0.314488	0	4435	0.00096185	-6.1225e-05	-15.7946	-148.413			0.314488	0	4435	0.00576495	0.000160494	32.2061	-215.087		0.314488	0	4435	0.0124885	0.000559176	-76.4015	190.759		0.314488	0	4435	0.00202272	-0.000187835
0.488792	0	4437	0.00857939	0.000106821	421.701	7091.35						0.488792	0	4437	0.0458226	-0.0068483	-10374.2	13823.5		0.488792	0	4437	0.000719728	5.90998e-05	-33.2863	-24.4413			0.488792	0	4437	0.000479842	5.42915e-05	478.477	26.2453		0.488792	0	4437	0.0071541	3.68287e-05	736.663	422.024		0.488792	0	4437	0.00315384	9.88523e-05
0.338558	0	4440	0.0806106	-0.00285075	-530.843	-618.692						0.338558	0	4440	1.79909	-1.92215	0	-6535.18		0.338558	0	4440	0.00307449	0.000137585	-72.4425	-87.4483			0.338558	0	4440	0.00588467	-0.00138541	450.086	634.9		0.338558	0	4440	0.0167002	2.48677e-05	-382.844	1815.74		0.338558	0	4440	0.00761681	0.000209313
0.47219	0	4453	0.135573	-0.00589896	1596.73	-12138.2						0.47219	0	4453	0.803795	-0.337245	-53056.5	271855		0.47219	0	4453	0.000719841	-6.78323e-05	600.741	-298.892			0.47219	0	4453	0.00519502	0.000245748	347.764	-657.418		0.47219	0	4453	0.00835593	-9.22579e-05	-6359.84	2820		0.47219	0	4453	0.0088652	-0.00316367
0.362089	0	4462	0.0284356	-0.00150603	848.83	311.545						0.362089	0	4462	2.7077	1.11473	0	-7475.18		0.362089	0	4462	0.00161415	-1.17274e-06	184.267	-28.6574			0.362089	0	4462	0.0125955	-2.37325e-05	11.9812	412.445		0.362089	0	4462	0.00840061	-0.000379782	2702.38	-619.567		0.362089	0	4462	0.0306971	0.00403124
0.301734	0	4473	0.00802586	0.00027501	-520.466	3061.57						0.301734	0	4473	0.0309725	0.0022319	40.076	6950.44		0.301734	0	4473	0.000758713	9.33568e-05	24.8013	-29.7124			0.301734	0	4473	0.0012743	-7.89466e-05	-58.2119	-1.7274		0.301734	0	4473	0.00293572	-4.36473e-05	-387.64	172.615		0.301734	0	4473	0.00143313	-0.000156196
0.365494	0	4475	0.0438273	0.000910197	316.952	-277.846						0.365494	0	4475	0.0511661	-0.0173118	-3626.81	43530.7		0.365494	0	4475	0.000974187	0.000266201	-28.8147	-14.5887			0.365494	0	4475	0.00485821	-2.14931e-05	203.8	426.175		0.365494	0	4475	0.00960979	-0.000934472	1149.61	599.941		0.365494	0	4475	0.0151778	0.000678096
0.437657	0	4512	0.0404399	0.000226864	981.957	-2957.98						0.437657	0	4512	0.0767333	-0.0356426	72559.5	-26307.2		0.437657	0	4512	0.000730824	0.000184757	265.347	-185.807			0.437657	0	4512	0.00235909	-0.000533687	62.8212	954.29		0.437657	0	4512	0.00508643	-0.000289806	1132.69	-79.314		0.437657	0	4512	0.0106763	0.000633711
0.353369	0	4521	0.0931394	-0.000603669	-1264.17	-1504.85						0.353369	0	4521	0.534475	-0.370106	-71511.2	77638.6		0.353369	0	4521	0.000984148	-6.00988e-05	383.917	-111.208			0.353369	0	4521	0.00232125	0.000882606	-421.819	-324.893		0.353369	0	4521	0.0130683	-0.00040273	-726.703	-653.929		0.353369	0	4521	0.0145074	0.00154763
0.452713	0	4524	0.00745229	-0.0223734	-2303.54	7670.19						0.452713	0	4524	0.00474238	0.000923252	-2892.86	-3852.52		0.452713	0	4524	0.000297655	2.37264e-05	-18.5263	-19.7186			0.452713	0	4524	0.00107529	0.000137135	43.7758	-400.691		0.452713	0	4524	0.00380264	0.00073015	-719.76	-965.745		0.452713	0	4524	0.00365233	0.000502418
0.385695	0	4536	0.0218839	0.000903117	-671.359	-990.399						0.385695	0	4536	1.68348	-1.30576	59266.3	-105552		0.385695	0	4536	0.00351208	-0.000195633	-376.36	403.445			0.385695	0	4536	0.0459906	-0.00553193	8485.84	-5015.01		0.385695	0	4536	0.0733558	-0.0105664	-987.759	-7654.48		0.385695	0	4536	1.27625	-0.823732
0.326438	0	4540	0.0381268	-0.00122508	-725.114	-1786.11						0.326438	0	4540	0.00924075	0.000398608	-32.6802	-643.249		0.326438	0	4540	0.000878215	-5.18341e-05	-34.1829	-212.275			0.326438	0	4540	0.00517849	2.7992e-05	-150.856	-262.376		0.326438	0	4540	0.0121537	0.000115516	-264.464	220.773		0.326438	0	4540	0.00297327	4.22489e-05
0.459912	0	4550	0.0465438	-0.00031155	-327.703	206.538						0.459912	0	4550	0.0511065	0.00724203	-38047.3	22777.8		0.459912	0	4550	0.00130449	0.000992947	-1195.25	-490.69			0.459912	0	4550	0.00114442	0.00195067	271.484	489.716		0.459912	0	4550	0.00591153	-0.000972447	2129.54	1299.74		0.459912	0	4550	0.00271888	-4.01597e-05
0.469624	0	4554	0.0401468	-0.00107945	859.091	-366.23						0.469624	0	4554	0.0972672	-0.00420626	-20365.8	-18775.1		0.469624	0	4554	0.000818063	-7.38196e-06	310.195	77.0952			0.469624	0	4554	0.00569969	-5.70013e-05	166.017	68.472		0.469624	0	4554	0.0157482	-0.000203744	2105.75	193.293		0.469624	0	4554	0.0111662	-0.000545673
0.339487	0	4556	0.0842702	-0.000319863	-414.123	671.487						0.339487	0	4556	0.112766	-0.00379046	-140538	-91617.9		0.339487	0	4556	0.00197675	-4.37718e-05	-29.4072	93.5337			0.339487	0	4556	0.00598689	0.000222567	-498.598	-132.614		0.339487	0	4556	0.00637922	0.000410582	-384.91	-1300.16		0.339487	0	4556	0.00621289	0.000934297
0.467126	0	4562	0.132735	-0.00103714	4115.03	-1762.02						0.467126	0	4562	0.985242	0.0835491	-26692.2	-290275		0.467126	0	4562	0.00244572	-0.000185707	350.306	-94.1279			0.467126	0	4562	0.00128943	0.000459034	-344.826	-1576.32		0.467126	0	4562	0.00357115	0.000992458	-2135.68	-174.933		0.467126	0	4562	0.0114015	-0.00260357
0.350207	0	4573	0.0830355	0.000290129	125.532	-156.801						0.350207	0	4573	0.0486882	0.00832578	26144	-34189.9		0.350207	0	4573	0.000347908	-0.000111491	-72.6264	-169.999			0.350207	0	4573	0.00266662	-4.8916e-05	360.508	191.128		0.350207	0	4573	0.00573448	0.000945155	837.956	-2023.9		0.350207	0	4573	0.00617122	0.000384311
0.388695	0	4574	0.0500971	-0.00135744	-279.024	-1025.46						0.388695	0	4574	0.0872303	0.032087	22158.6	-36107.5		0.388695	0	4574	0.000889512	-1.31704e-06	312.791	-130.651			0.388695	0	4574	0.00292144	0.000224362	681.14	-180.979		0.388695	0	4574	0.0017217	0.00168437	25.6012	-2212.87		0.388695	0	4574	0.00241538	0.00210698
0.442156	0	4595	0.0365396	0.00122993	-997.532	8410.36						0.442156	0	4595	0.252114	0.542884	0	-11146.6		0.442156	0	4595	0.000533075	-2.81172e-05	8.08857	26.8299			0.442156	0	4595	0.00411334	-6.79914e-05	617.403	-473.041		0.442156	0	4595	0.00369622	0.000213365	1077.97	377.013		0.442156	0	4595	0.0124096	-0.000566352
0.469246	0	4596	0.0283186	2.26639e-06	-1076.81	-5058.99						0.469246	0	4596	3.9154	-1.31267	14431.1	126432		0.469246	0	4596	0.00246836	-0.000243696	975.282	-138.137			0.469246	0	4596	0.0160544	-0.00722985	6600.49	1259.9		0.469246	0	4596	0.0263072	-0.0675006	54800.9	-16846.4		0.469246	0	4596	0.0193407	-0.00164368
0.495449	0	4603	0.00656326	0.000184881	-2999.43	4177.72						0.495449	0	4603	0.00394443	0.00317446	3834.6	-408.886		0.495449	0	4603	4.73374e-05	9.10914e-06	21.927	5.74921			0.495449	0	4603	0.000204598	-0.000137156	-40.6307	-95.7166		0.495449	0	4603	0.000441107	-0.000100842	118.01	215.864		0.495449	0	4603	0.000734888	-0.000597291
0.477742	0	4608	0.00682427	0.00192484	1036.66	-1904.38						0.477742	0	4608	0.00486317	-0.00176926	-4101.03	1225.65		0.477742	0	4608	0.000141629	-2.92181e-05	11.5547	19.5534			0.477742	0	4608	0.000493897	0.000173987	-21.0795	36.2359		0.477742	0	4608	0.00172115	0.000533498	-206.724	-22.5507		0.477742	0	4608	0.00110148	-0.000269365
0.312555	0	4609	0.0195122	0.00025991	10.2638	4405.53						0.312555	0	4609	0.0548189	-0.0240461	24990.9	-60034.6		0.312555	0	4609	0.000865985	2.11712e-05	59.128	-19.0308			0.312555	0	4609	0.00139518	1.6531e-05	195.246	-224.634		0.312555	0	4609	0.00549764	-0.000189107	716.537	-59.0853		0.312555	0	4609	0.00653885	-0.000212714
0.306949	0	4621	0.0236415	0.000165512	1107.1	-2536.51						0.306949	0	4621	2.3414	-1.13503	-904726	-50864.8		0.306949	0	4621	0.00185002	-0.000164147	150.999	256			0.306949	0	4621	0.0197446	-0.00282943	-2549.74	1.39304		0.306949	0	4621	1.01657	-2.13843	0.0158459	-5371.8		0.306949	0	4621	0.937207	-0.411628
0.381555	0	4628	0.00199959	-0.00191172	1082.11	2791.18						0.381555	0	4628	2.94989	-2.19033	965594	-814598		0.381555	0	4628	0.00426775	-0.000377306	-95.705	410.337			0.381555	0	4628	0.0160683	-0.0144954	-16201.2	9883.54		0.381555	0	4628	0.037911	0.0194833	9421.34	17770.2		0.381555	0	4628	0.00265516	0.0385701
0.359353	0	4630	0.048481	-0.00123954	976.287	-566.524						0.359353	0	4630	0.0472102	-0.0243684	-27412	66705.9		0.359353	0	4630	0.00186011	-0.0102458	1041.61	1604.05			0.359353	0	4630	0.00448852	-0.00185721	118.451	130.85		0.359353	0	4630	0.00803621	-0.00733863	-955.487	-2024.45		0.359353	0	4630	0.0067908	0.00371273
0.385457	0	4633	0.0226082	-0.000710296	703.732	-97.2974						0.385457	0	4633	0.112744	0.00145395	-30785.6	498.554		0.385457	0	4633	0.000570152	2.99666e-06	155.855	45.4653			0.385457	0	4633	0.00346208	-9.33783e-05	243.615	-350.938		0.385457	0	4633	0.00891182	-0.000693712	1107.95	56.383		0.385457	0	4633	0.00529361	-0.00159263
0.371006	0	4634	0.015884	0.000800735	-7.56914	-2312.68						0.371006	0	4634	1.66573	-0.970476	-67912	107984		0.371006	0	4634	0.0067882	0.000819264	19.8563	-386.551			0.371006	0	4634	0.252349	-0.102426	24582.5	11765.1		0.371006	0	4634	3.53282	-4.79827	0	-7847.87		0.371006	0	4634	2.0169	-1.06977
0.463271	0	4635	0.0568044	0.00074003	-524.235	-1322.9						0.463271	0	4635	0.303769	-0.0445032	-36964.5	52399.9		0.463271	0	4635	0.00094342	6.67996e-05	-280.313	-179.097			0.463271	0	4635	0.00412695	0.00103984	-192.48	-1926.56		0.463271	0	4635	0.00998545	-0.000544668	-1480.42	-1374.03		0.463271	0	4635	0.00942369	0.00162689
0.44487	0	4637	0.0322128	-0.00380376	-1364.91	-1518.97						0.44487	0	4637	0.0996764	-0.144851	-60143.3	-30366.6		0.44487	0	4637	0.000885969	3.08123e-05	-65.7518	-95.6733			0.44487	0	4637	0.00291136	-2.38761e-05	-692.298	305.259		0.44487	0	4637	0.0135385	-0.000225792	-1812.17	788.751		0.44487	0	4637	0.0176245	0.00115872
0.415367	0	4638	0.0237246	-0.0015571	617.833	-598.524						0.415367	0	4638	0.0397584	-0.0211472	1355.72	-22132.3		0.415367	0	4638	0.000562543	-8.4449e-05	131.001	-127.384			0.415367	0	4638	0.00167899	-0.000383472	-99.5313	-321.658		0.415367	0	4638	0.00469004	0.000647129	-2722.46	-158.604		0.415367	0	4638	0.00546603	-0.000990823
0.328741	0	4640	0.0704268	-0.00105166	-203.889	736.277						0.328741	0	4640	1.98443	-6.1622	-88002	-95001		0.328741	0	4640	0.000753158	-0.0001824	-25.3417	145.454			0.328741	0	4640	0.00336725	0.00026558	-65.7919	-557.168		0.328741	0	4640	0.0146037	0.00046071	-685.446	-3090.71		0.328741	0	4640	0.0118506	0.000131462
0.49179	0	4641	0.0518591	-0.00122812	667.024	-1239.94						0.49179	0	4641	0.0207728	-0.00547118	6049.77	-25363.5		0.49179	0	4641	0.00124224	-0.000148429	205.974	292.539			0.49179	0	4641	0.00528961	2.03712e-05	-396.745	469.806		0.49179	0	4641	0.0141524	-0.0004572	3460	-3042.87		0.49179	0	4641	0.0131885	0.00135273
0.411547	0	4645	0.021687	0.00125817	-302.649	8037.48						0.411547	0	4645	0.114488	0.169768	-119102	1722.1		0.411547	0	4645	0.000844489	-1.66586e-05	96.4136	-38.9824			0.411547	0	4645	0.00231733	-9.35871e-05	130.118	-114		0.411547	0	4645	0.00466565	0.000669141	954.492	-947.571		0.411547	0	4645	0.0127036	-0.000231036
0.413872	0	4647	0.0132007	-0.000275087	841.013	945.242						0.413872	0	4647	0.0228414	5.8712e-05	-606.279	-1341.03		0.413872	0	4647	0.00188953	9.22459e-05	161.539	251.263			0.413872	0	4647	0.00259554	0.000127971	-660.213	-410.082		0.413872	0	4647	0.00620452	1.86717e-05	-1135.79	222.682		0.413872	0	4647	0.00581892	0.00039709
0.449142	0	4649	0.060306	0.00080113	2182.03	-1170.65						0.449142	0	4649	0.457404	-1.05214	-42684.5	88293.2		0.449142	0	4649	0.00261831	-5.60019e-05	20.2358	57.547			0.449142	0	4649	0.00283296	0.000292978	-481.701	-134.777		0.449142	0	4649	0.0107038	-0.00030707	1540.51	-1942.38		0.449142	0	4649	0.00414752	-0.000281362
0.391936	0	4655	0.0574877	-0.00159298	-185.132	2079.92						0.391936	0	4655	0.150328	-0.0143657	67938.2	-40625.4		0.391936	0	4655	0.00222517	-0.000128534	761.048	108.117			0.391936	0	4655	0.00307318	-0.000213689	-734.049	454.413		0.391936	0	4655	0.00317755	0.000130438	-113.31	-553.371		0.391936	0	4655	0.00416992	-0.000937894
0.352239	0	4656	0.0187413	0.000999738	912.877	-1262.05						0.352239	0	4656	0.0343121	-0.104537	-3228.56	-21404.4		0.352239	0	4656	0.000514225	1.37263e-05	-103.501	-20.8668			0.352239	0	4656	0.000880044	-0.000124106	-160.363	-65.291		0.352239	0	4656	0.00114478	-8.21805e-05	503.914	265.656		0.352239	0	4656	0.00272081	0.0108628
0.338288	0	4661	0.0244541	-0.00417701	-607.021	2513.43						0.338288	0	4661	0.0424203	0.0074847	6820.65	20.2516		0.338288	0	4661	0.00065667	-4.19669e-05	-104.027	28.2288			0.338288	0	4661	0.000738905	0.000118189	149.821	204.922		0.338288	0	4661	0.00309321	0.000585465	-292.17	110.255		0.338288	0	4661	0.00149443	-3.07614e-05
0.397486	0	4665	0.109484	0.000816593	175.773	-1220.83						0.397486	0	4665	0.0851203	-0.0418751	42325.4	98528.2		0.397486	0	4665	8.68894e-05	3.82521e-05	-112.323	21.9437			0.397486	0	4665	0.00425368	-5.86389e-05	1.32829	-220.1		0.397486	0	4665	0.00343731	3.73459e-05	250.744	-1912.54		0.397486	0	4665	0.00618844	-0.00102273
0.392038	0	4674	0.0355838	0.00166076	370.333	-3831.1						0.392038	0	4674	2.24861	0.4081	-27475.6	188820		0.392038	0	4674	0.00326318	0.000145088	-178.743	-65.7626			0.392038	0	4674	0.0261523	0.00428704	11722.5	-5665.35		0.392038	0	4674	3.23495	1.2425	44984.5	30517.4		0.392038	0	4674	1.6618	0.135712
0.338818	0	4679	0.027859	-0.00267397	1281.93	1145.33						0.338818	0	4679	0.0605991	0.00726875	12523	-8187.69		0.338818	0	4679	0.000518619	-1.2573e-05	-6.99655	21.7925			0.338818	0	4679	0.00240088	-0.000161728	-84.5887	31.9351		0.338818	0	4679	0.00442644	1.12491e-05	402.742	336.55		0.338818	0	4679	0.00674909	-0.000883145
0.391398	0	4690	0.0309752	0.00298819	1548.93	-1362.44						0.391398	0	4690	0.0244853	0.0152346	-1619.93	-40731.5		0.391398	0	4690	0.0024933	-5.43002e-05	-87.566	-22.0272			0.391398	0	4690	0.00232139	-0.000192281	-158.609	-67.9253		0.391398	0	4690	0.0052074	0.000508473	1443.61	42.3012		0.391398	0	4690	0.00325077	-0.00165954
0.445645	0	4693	0.00946063	-0.00185712	619.669	261.563						0.445645	0	4693	0.0120934	-0.0414779	67304.1	-15590.2		0.445645	0	4693	0.000511356	2.14356e-05	-26.0227	34.518			0.445645	0	4693	0.000740665	-0.000217535	-14.6866	256.492		0.445645	0	4693	0.00224846	-0.000933243	1417.89	-22.3392		0.445645	0	4693	0.0037504	0.000507784
0.32448	0	4696	0.0473415	-0.00333822	-624.383	-113.244						0.32448	0	4696	0.0632551	-0.064301	3134.39	37789.6		0.32448	0	4696	0.000359051	-6.57819e-05	-149.159	3.70769			0.32448	0	4696	0.0019498	-2.83371e-05	-517.714	260.825		0.32448	0	4696	0.0133987	-0.000359544	-519.314	604.471		0.32448	0	4696	0.0136979	-0.000803441
0.41386	0	4700	0.0147238	-0.0024724	1029.98	4451.34						0.41386	0	4700	3.59578	-0.719107	0	-9765.56		0.41386	0	4700	0.00139429	0.000178602	-345.507	-68.6128			0.41386	0	4700	0.00731988	0.00120374	-2029.7	-2376.04		0.41386	0	4700	0.0132622	-0.000613728	-2123.1	-4189.47		0.41386	0	4700	0.0156327	-0.0093576
0.449673	0	4706	0.0960318	-0.00926019	-2521.45	-11042						0.449673	0	4706	0.0677613	0.0216662	71457.7	80092.9		0.449673	0	4706	0.00154607	0.000782814	436.885	-726.06			0.449673	0	4706	0.00266617	0.000394237	-245.648	-881.882		0.449673	0	4706	0.00548049	-0.00128661	-1297.21	544.664		0.449673	0	4706	0.0100025	0.00676566
0.421204	0	4727	0.0222379	-0.000646109	1849.52	-717.716						0.421204	0	4727	0.01783	0.000993502	1133.28	-2581.56		0.421204	0	4727	0.000466568	-3.71085e-05	-73.1471	-204.97			0.421204	0	4727	0.00279094	0.000265544	-76.0723	-348.848		0.421204	0	4727	0.00722774	0.000548264	-70.9001	425.239		0.421204	0	4727	0.00164335	0.000287835
0.399783	0	4730	0.02152	0.0097566	2174.78	-2452.57						0.399783	0	4730	0.04481	-0.0166687	14724.1	19802.9		0.399783	0	4730	0.00283646	0.000218996	-33.5447	-315.271			0.399783	0	4730	0.00220555	-0.000740657	140.054	-151.097		0.399783	0	4730	0.00328472	0.00150474	8.17864	-2149.19		0.399783	0	4730	0.00244329	-0.00262414
0.480579	0	4732	0.0871897	-0.000183368	4.42229	406.259						0.480579	0	4732	0.0786606	-0.0505069	94328.1	19300.8		0.480579	0	4732	0.000652204	-5.08627e-05	-31.6458	-172.472			0.480579	0	4732	0.00260075	1.34325e-05	134.316	-458.624		0.480579	0	4732	0.00447112	0.000816316	-196.026	-1415.45		0.480579	0	4732	0.00610985	0.00234293
0.44659	0	4735	0.136105	-0.000102019	-88.9656	-11926.2						0.44659	0	4735	0.9301	1.35994	99764.6	-245573		0.44659	0	4735	0.000439886	-0.000160225	330.078	-439.854			0.44659	0	4735	0.00695411	0.00151362	271.68	-1715.63		0.44659	0	4735	0.0113272	0.00742966	-4525.18	-1585.98		0.44659	0	4735	0.0104329	-0.00017716
0.440125	0	4739	0.0958173	-0.0015956	-2567.48	-645.084						0.440125	0	4739	1.28746	0.701533	197039	286773		0.440125	0	4739	0.000695158	-0.000728478	-232.662	590.044			0.440125	0	4739	0.0121698	0.0013186	-274.562	1529.94		0.440125	0	4739	0.0182269	0.00176001	558.824	-1263.72		0.440125	0	4739	0.0125025	-0.00542806
0.32197	0	4741	0.0111826	0.000294385	-249.165	-883.264						0.32197	0	4741	0.064677	0.0146249	892.303	-26909.9		0.32197	0	4741	0.000581272	0.000189947	-25.3947	46.4665			0.32197	0	4741	0.00140159	0.000205456	-54.7262	-185.872		0.32197	0	4741	0.00411804	0.000482533	279.503	132.881		0.32197	0	4741	0.00702791	-0.00167289
0.449212	0	4744	0.057254	-0.00183197	-3882.22	-4829.77						0.449212	0	4744	0.109592	-0.0329921	-17887.4	-42911.9		0.449212	0	4744	0.00105204	-4.2872e-05	449.125	-149.577			0.449212	0	4744	0.0023609	0.000496157	140.227	-754.409		0.449212	0	4744	0.00947176	-0.000188296	-211.599	-540.969		0.449212	0	4744	0.00628699	0.000921101
0.374786	0	4749	0.020932	0.000467049	246.91	-606.234						0.374786	0	4749	0.077679	-0.00730901	9499.82	-7054.46		0.374786	0	4749	0.00131207	-5.529e-05	-88.8946	-11.2373			0.374786	0	4749	0.000675114	-0.000136355	-18.7049	-53.4497		0.374786	0	4749	0.00201235	0.000168184	-83.9055	-96.2262		0.374786	0	4749	0.00272363	-0.000898882
0.477135	0	4764	0.0273338	0.00274368	170.718	-2829.9						0.477135	0	4764	3.56831	0.79976	-744098	-209958		0.477135	0	4764	0.00260883	-9.6411e-05	313.663	-300.678			0.477135	0	4764	0.0040119	-0.000251102	-802.214	1263.32		0.477135	0	4764	0.0110405	-0.000630884	3293.58	-2382.56		0.477135	0	4764	0.00947152	-0.00252146
0.311265	0	4769	0.0807406	-0.000326515	-307.579	-1661.41						0.311265	0	4769	0.0795402	0.0641502	-63425.9	48690.7		0.311265	0	4769	0.000477639	0.000248735	-197.762	-188.035			0.311265	0	4769	0.00282391	-8.41374e-05	384.352	306.863		0.311265	0	4769	0.00551096	-0.000605743	-213.745	-873.086		0.311265	0	4769	0.0115809	0.000179515
0.446814	0	4775	0.0961632	0.00182337	-1311.61	-5735.91						0.446814	0	4775	0.127423	-0.0263951	10057	-1552.16		0.446814	0	4775	0.000822456	2.34385e-05	-478.741	20.3532			0.446814	0	4775	0.00153902	-0.000416854	481.763	647.506		0.446814	0	4775	0.00353714	-0.000745017	818.017	-1731.87		0.446814	0	4775	0.0244647	-0.00348734
0.411251	0	4780	0.0695005	-0.00269947	-259.392	-842.148						0.411251	0	4780	0.216168	-0.167182	190527	74033.3		0.411251	0	4780	0.000400273	-5.05507e-05	-312.375	135.954			0.411251	0	4780	0.00163346	-0.000160408	-924.498	723.28		0.411251	0	4780	0.0169204	-0.00063904	-922.385	1087.56		0.411251	0	4780	0.0124588	0.000249536
0.483456	0	4796	0.00132267	-0.000456208	577.371	185.763						0.483456	0	4796	4.44911e-05	-0.000211766	-52.9686	-293.987		0.483456	0	4796	0.00018328	-5.37103e-05	55.914	19.7281			0.483456	0	4796	0.000203184	3.48595e-06	-49.6948	-66.3857		0.483456	0	4796	0.00108526	0.000229153	32.8419	65.9977		0.483456	0	4796	0.000841144	3.63467e-06
0.445706	0	4811	0.0385635	0.000341911	-217.878	-1388.03						0.445706	0	4811	0.0432828	-0.000294904	-66435.3	117438		0.445706	0	4811	0.0013811	0.00109217	497.874	-190.272			0.445706	0	4811	0.000881888	-0.000346025	296.791	445.588		0.445706	0	4811	0.00768971	-0.000993105	-3504.24	5458.76		0.445706	0	4811	0.00505573	-0.000163487
0.463645	0	4814	0.0582808	-0.00447221	2973.56	7086.54						0.463645	0	4814	1.73352	-1.08758	231825	-445065		0.463645	0	4814	0.00196675	9.6346e-05	298.568	28.0744			0.463645	0	4814	0.00797852	0.000705191	-2122.95	498.372		0.463645	0	4814	0.0193143	-0.000372465	8950.71	-410.18		0.463645	0	4814	0.0143433	0.000673912
0.323506	0	4815	0.00451656	0.00043624	230.373	1893.45						0.323506	0	4815	0.0256735	0.00275744	-1676.44	598.042		0.323506	0	4815	0.000614438	1.5101e-05	56.7472	-39.2088			0.323506	0	4815	0.000645553	1.18706e-05	-40.8625	0.0756159		0.323506	0	4815	0.00217671	0.000344691	121.905	95.6607		0.323506	0	4815	0.00217696	4.72638e-05
0.406341	0	4820	0.0727816	0.000857844	-1756.08	-1161.62						0.406341	0	4820	0.161541	-0.295865	7978.82	-104362		0.406341	0	4820	0.00194994	-6.64756e-05	-22.0328	152.354			0.406341	0	4820	0.00399371	0.000354012	130.468	-574.107		0.406341	0	4820	0.00515804	-0.000711301	-2738.37	643.814		0.406341	0	4820	0.00525522	0.000320707
0.313709	0	4829	0.107213	0.003304	942.187	707.154						0.313709	0	4829	2.35396	-0.0100851	0	-5611.04		0.313709	0	4829	0.00225178	-0.000334439	-93.1439	161.845			0.313709	0	4829	0.00874217	-0.0005094	918.716	292.126		0.313709	0	4829	0.00721989	0.018955	2008.8	1224.88		0.313709	0	4829	0.018486	-0.00308458
0.397488	0	4838	0.024577	0.00119033	117.025	822.776						0.397488	0	4838	0.00925347	-0.0022435	3409.24	910.773		0.397488	0	4838	0.00110386	3.48762e-05	-70.906	-129.533			0.397488	0	4838	0.00205074	5.02015e-05	-317.723	-435.675		0.397488	0	4838	0.00529409	0.00041749	-386.019	264.892		0.397488	0	4838	0.00262029	0.000131689
0.376941	0	4841	0.0555447	0.00101507	261.603	-713.782						0.376941	0	4841	0.10191	0.0485284	-42295.6	-5591.97		0.376941	0	4841	0.00206501	-0.000272515	-93.0502	96.3126			0.376941	0	4841	0.00248836	0.000536197	219.776	-775.543		0.376941	0	4841	0.00754459	0.000323507	690.351	-1185.96		0.376941	0	4841	0.00691272	-0.00174985
0.385027	0	4849	0.0774739	0.00173701	-161.486	-876.117						0.385027	0	4849	0.0335617	0.0117597	-1300.99	37682.7		0.385027	0	4849	0.000261232	-0.000111234	-24.2268	468.345			0.385027	0	4849	0.000626376	-7.80926e-05	388.775	335.984		0.385027	0	4849	0.0123068	-0.000667943	693.316	-1889.61		0.385027	0	4849	0.00195369	-2.8708e-05
0.3012	0	4852	0.00608763	0.000294953	111.41	866.518						0.3012	0	4852	0.0152599	-0.00776103	-8674.12	9955.77		0.3012	0	4852	0.000159923	-1.16075e-05	31.0499	4.05627			0.3012	0	4852	0.000198864	6.1469e-05	-3.32569	-8.06285		0.3012	0	4852	0.000855344	0.000145804	126.091	-7.25658		0.3012	0	4852	0.000957841	-0.00010003
0.438543	0	4856	0.0976306	0.0036747	-210.53	-10088.3						0.438543	0	4856	0.779305	-1.46279	66784.8	-13122.5		0.438543	0	4856	0.00247681	-9.72195e-05	-7.74629	-445.831			0.438543	0	4856	0.00448388	-0.000534854	465.162	470.773		0.438543	0	4856	0.00486611	-0.00383478	-3536.04	-4672.93		0.438543	0	4856	0.025521	0.00189352
0.495789	0	4871	0.015981	0.000317407	616.248	-3395.34						0.495789	0	4871	4.90811	-0.982193	-71328.6	278952		0.495789	0	4871	0.00273121	-0.000146609	407.722	552.709			0.495789	0	4871	0.00719039	0.00062148	656.143	6.69294		0.495789	0	4871	0.0200758	-0.00197701	10401.9	-8343.51		0.495789	0	4871	0.0396065	0.00940811
0.301704	0	4883	0.0712504	-4.78315e-05	31.1725	175.097						0.301704	0	4883	0.537405	-2.01326	0	-5189.83		0.301704	0	4883	0.00319831	-0.000113261	-37.7821	22.2648			0.301704	0	4883	0.00460108	0.000228679	-352.29	250.404		0.301704	0	4883	0.011417	0.00123587	64.2236	1170.21		0.301704	0	4883	0.0051291	-0.00120237
0.319453	0	4890	0.0521331	0.00199949	-650.446	4005.09						0.319453	0	4890	0.0152255	-0.122664	-35222.4	-5853.61		0.319453	0	4890	0.00020968	0.000141663	21.6047	-63.4584			0.319453	0	4890	0.00657377	8.57586e-05	-96.9825	109.26		0.319453	0	4890	0.00288889	-0.000183135	-174.673	220.5		0.319453	0	4890	0.00926706	0.000914192
0.369743	0	4898	0.0775236	0.00102205	1151.28	357.112						0.369743	0	4898	0.104102	-0.0928665	76581.9	-29720.5		0.369743	0	4898	0.00231741	-5.07968e-05	57.7583	77.1228			0.369743	0	4898	0.00549354	-0.000297935	401.068	157.266		0.369743	0	4898	0.0120022	-0.000180866	-411.042	-847.724		0.369743	0	4898	0.0167242	-0.000170842
0.381443	0	4902	0.110167	-0.00142252	745.67	1389.29						0.381443	0	4902	0.712608	0.200721	0	-8295.62		0.381443	0	4902	0.00249457	8.52385e-05	130.964	10.9834			0.381443	0	4902	0.00615013	0.000669276	-195.113	-857.658		0.381443	0	4902	0.00212621	0.000503408	-446.503	-2289.43		0.381443	0	4902	0.00408947	5.74918e-06
0.376776	0	4908	0.0102259	0.00272404	473.062	-2212.29						0.376776	0	4908	1.68126	0.21633	0	-8093.87		0.376776	0	4908	0.00724947	0.000828248	-1375.54	169.05			0.376776	0	4908	1.54623	1.68417	0.484348	-8095.05		0.376776	0	4908	3.78104	-0.954471	0	-8093.87		0.376776	0	4908	1.17253	0.0854718
0.420624	0	4929	0.0142092	-0.0106075	684.571	462.419						0.420624	0	4929	0.00468273	-0.0323025	21954.6	-14523.2		0.420624	0	4929	0.000198439	-3.87101e-05	-11.3924	-25.4743			0.420624	0	4929	0.000359571	-3.79075e-05	61.6027	-114.553		0.420624	0	4929	0.0015832	-0.000144188	877.486	167.077		0.420624	0	4929	0.00390658	-0.000180112
0.37577	0	4980	0.00898456	0.000485901	-71.7285	71.5153						0.37577	0	4980	0.00552559	0.00532852	24089.5	52662.3		0.37577	0	4980	0.000159298	3.47867e-06	-55.5405	0.512045			0.37577	0	4980	0.00140629	0.000397745	-179.073	-2.03247		0.37577	0	4980	0.00356891	0.000331461	-388.694	-410.927		0.37577	0	4980	0.00408055	0.000857184
0.335888	0	4981	0.0742155	0.00218573	-473.527	-57.1012						0.335888	0	4981	0.109564	-0.0151234	-15919.4	-82325.5		0.335888	0	4981	6.99639e-05	5.79462e-05	237.943	-155.133			0.335888	0	4981	0.000533001	-0.000326421	-137.176	50.3188		0.335888	0	4981	0.0152606	-0.000139492	-1058.15	3523.93		0.335888	0	4981	0.00437211	-7.33919e-05
0.343015	0	4982	0.0050741	-0.000344538	-81.8808	-139.156						0.343015	0	4982	0.0136335	0.00140068	-449.311	-344.678		0.343015	0	4982	0.000986246	3.95148e-05	87.1445	133.786			0.343015	0	4982	0.00139101	0.000126456	-196.166	-115.047		0.343015	0	4982	0.00439003	-0.000442731	-453.045	111.873		0.343015	0	4982	0.00282705	0.000243481
0.349142	0	5001	0.086088	-0.00227227	-627.263	-818.759						0.349142	0	5001	0.426482	0.298107	-33658.1	66448.6		0.349142	0	5001	0.00382089	-0.0068788	-164.045	-1288.6			0.349142	0	5001	0.00594437	-0.001824	739.549	-582.519		0.349142	0	5001	0.0175412	-0.00288356	1750.49	-6079.27		0.349142	0	5001	0.00802499	0.00620995
0.388401	0	5011	0.068573	-0.00186602	-549.699	-392.414						0.388401	0	5011	0.0364912	0.216538	-42601.4	30451.9		0.388401	0	5011	0.0022354	0.000218197	108.281	-117.776			0.388401	0	5011	0.00595059	-0.000267441	822.717	281.615		0.388401	0	5011	0.0186432	0.000405227	1785.85	-614.873		0.388401	0	5011	0.00879168	-4.84104e-05
0.400171	0	5013	0.0603275	0.0100411	-1591.97	-5956.15						0.400171	0	5013	0.109471	0.0159624	-83035.2	9210.03		0.400171	0	5013	0.000672762	9.28899e-05	360.529	-160.054			0.400171	0	5013	0.00214575	0.000799223	39.0406	-492.762		0.400171	0	5013	0.00844066	0.000573238	362.238	-364.784		0.400171	0	5013	0.0128568	-0.00222717
0.440415	0	5026	0.00555701	0.000193962	-234.485	-232.975						0.440415	0	5026	0.00462015	0.000183171	-3182.36	-3306.08		0.440415	0	5026	0.000990738	9.11629e-06	-22.0258	155.23			0.440415	0	5026	0.00077241	-0.000133812	-301.513	-286.302		0.440415	0	5026	0.00556238	-0.000127706	504.669	270.249		0.440415	0	5026	0.00129235	-0.000298841
0.420358	0	5034	0.0354403	-0.00418402	1569.77	6031.96						0.420358	0	5034	3.87406	0.835598	0	-10074.6		0.420358	0	5034	0.000669543	0.000196168	-454.95	-18.7768			0.420358	0	5034	0.0072443	0.000184971	1393.96	-1768.34		0.420358	0	5034	0.0221727	-0.00017771	-1130.25	-1550.49		0.420358	0	5034	0.0159064	0.0209064
0.301492	0	5039	0.0797664	0.000905877	732.225	311.904						0.301492	0	5039	0.241733	-0.464381	-137996	35515.7		0.301492	0	5039	0.00232294	-4.94744e-05	35.9496	59.6678			0.301492	0	5039	0.00545109	-0.000260313	233.557	189.286		0.301492	0	5039	0.0125439	-0.00028382	-354.326	-516.299		0.301492	0	5039	0.0171627	-0.00044674
0.303103	0	5052	0.0232108	0.00274032	22.3902	2237.52						0.303103	0	5052	0.0527237	0.0025454	-2804.79	-8216.99		0.303103	0	5052	0.000623607	-0.000119143	80.5563	11.5092			0.303103	0	5052	0.00198434	0.000361328	39.1013	-106.534		0.303103	0	5052	0.00218251	-0.000215698	353.661	369.225		0.303103	0	5052	5.66121e-05	0.000329478
0.440615	0	5071	0.0333642	-0.0147556	2938.52	623.408						0.440615	0	5071	0.0157348	0.0649554	42644.2	-38640.5		0.440615	0	5071	0.00049783	-8.59134e-05	-139.339	-169.168			0.440615	0	5071	0.00099169	0.000289438	-63.168	411.829		0.440615	0	5071	0.00128657	0.000395711	-615.219	-371.515		0.440615	0	5071	0.0112286	0.003019
0.317449	0	5076	0.0200968	-0.00125743	343.567	137.316						0.317449	0	5076	0.0444274	0.0343025	12108.9	-24151.4		0.317449	0	5076	0.00280772	0.0382506	4248.57	-7175.02			0.317449	0	5076	0.00185512	0.015949	1188.25	-1847.61		0.317449	0	5076	0.00359489	0.0097284	494.455	-748.288		0.317449	0	5076	0.00307446	6.64985e-05
0.327513	0	5078	0.00965611	0.00079867	-1284.99	-299.48						0.327513	0	5078	4.53124	4.43223	0	-6115.74		0.327513	0	5078	0.000289124	7.12263e-05	27.8607	-171.659			0.327513	0	5078	0.0118421	0.000216729	2417.68	-2341.7		0.327513	0	5078	0.0254468	0.00789129	49532.7	-22338.5		0.327513	0	5078	0.0279693	-0.00326542
0.358104	0	5110	0.0150009	0.00113402	962.794	-402.292						0.358104	0	5110	0.0620357	-0.00774549	735.058	6474.95		0.358104	0	5110	0.000430112	6.52108e-06	-66.2162	-5.28005			0.358104	0	5110	0.00045836	3.91724e-05	20.4049	2.43144		0.358104	0	5110	0.00164892	-0.000340578	685.897	118.685		0.358104	0	5110	0.0125889	-0.00655359
0.491106	0	5111	0.0240043	0.00162251	-3048.57	3338.19						0.491106	0	5111	0.0139591	0.00302501	11450.2	-9460.38		0.491106	0	5111	0.00101119	-3.22827e-05	126.641	144.68			0.491106	0	5111	0.00303771	-7.88037e-05	328.173	-647.251		0.491106	0	5111	0.00485444	3.89752e-05	-1181.45	529.359		0.491106	0	5111	0.00425961	0.00010752
0.484352	0	5112	0.0118178	7.1583e-05	-1703.19	4745.9						0.484352	0	5112	0.050448	0.00710753	25478.2	-2322.32		0.484352	0	5112	0.000691333	3.4623e-05	-180.708	72.7132			0.484352	0	5112	0.000306619	5.88238e-05	-12.4042	406.424		0.484352	0	5112	0.00468664	0.000599718	-584.348	-50.907		0.484352	0	5112	0.0011292	-0.000182064
0.416456	0	5121	0.0514974	0.00157686	963.199	307.058						0.416456	0	5121	0.0803639	0.01071	-22133.2	-88183.8		0.416456	0	5121	0.00143705	9.92984e-05	-12.55	-147.717			0.416456	0	5121	0.0045308	-0.000451048	133.989	97.7939		0.416456	0	5121	0.00547913	0.00082872	-533.917	-2604.88		0.416456	0	5121	0.0107224	0.00137241
0.355392	0	5123	0.0581513	-0.00145019	-17.4018	-44.9693						0.355392	0	5123	0.0786899	-0.0731678	-61361.2	5010.83		0.355392	0	5123	0.00147984	0.000140591	178.509	-62.6117			0.355392	0	5123	0.00598889	-0.00040488	445.383	423.388		0.355392	0	5123	0.0159547	-0.000298815	1967.03	-2092.31		0.355392	0	5123	0.010427	-6.65127e-05
0.438254	0	5157	0.0354644	-0.000935391	2064.61	6092.6						0.438254	0	5157	2.36715	-2.80732	382079	-180421		0.438254	0	5157	0.00168881	1.28312e-05	-155.2	122.785			0.438254	0	5157	0.0036675	0.000326834	-1501.17	9.93792		0.438254	0	5157	0.0208303	0.000819586	-3655	-3520.71		0.438254	0	5157	0.0290199	-0.00793659
0.467505	0	5162	0.0355723	-0.00101421	-2485.61	-5241.33						0.467505	0	5162	3.72475	1.07707	-506098	434139		0.467505	0	5162	0.00510956	0.000235841	-308.325	-1014.84			0.467505	0	5162	0.00668177	0.000964992	1257.58	-1291.27		0.467505	0	5162	0.00597347	-0.000580478	-11594.5	396.345		0.467505	0	5162	0.068754	-0.0422447
0.447006	0	5186	0.076462	-1.20413e-05	325.007	9716.67						0.447006	0	5186	1.33362	-1.68992	-375696	411942		0.447006	0	5186	0.00119842	0.000294264	309.751	-291.632			0.447006	0	5186	0.00807725	-3.31672e-05	-316.051	658.684		0.447006	0	5186	0.00637592	0.000783895	1008.63	-867.231		0.447006	0	5186	0.0129755	0.0028842
0.464302	0	5191	0.106742	0.00327914	-5259.79	-5076.28						0.464302	0	5191	1.82046	0.360005	-54748.7	47430.2		0.464302	0	5191	0.00229087	0.000746297	-485.005	35.5812			0.464302	0	5191	0.0104609	0.00347189	3204.91	533.704		0.464302	0	5191	0.00918966	0.00239205	50.1602	805.18		0.464302	0	5191	0.022343	-0.000126591
0.489264	0	5196	0.0414488	0.00173472	-2106.76	9965.14						0.489264	0	5196	1.26321	-1.65925	291729	45164		0.489264	0	5196	0.000536184	-6.20052e-05	-59.9774	24.9403			0.489264	0	5196	0.00471434	-6.62288e-05	826.399	-394.564		0.489264	0	5196	0.00343219	0.000296677	2242.57	317.825		0.489264	0	5196	0.0140631	-0.000545711
0.32277	0	5208	0.0264529	-0.000292512	-1583.72	-1115.33						0.32277	0	5208	3.77512	-0.624767	97948.5	-62006.7		0.32277	0	5208	0.0030213	-1.55767e-05	500.135	-37.1239			0.32277	0	5208	0.014922	0.00382117	2898.11	-244.7		0.32277	0	5208	0.0254991	0.0454216	-16230.9	23138.3		0.32277	0	5208	0.0134451	-0.019869
0.480831	0	5212	0.107432	0.00181539	-4558.46	-10283.4						0.480831	0	5212	0.90853	-0.326389	33424.9	154446		0.480831	0	5212	0.00284391	-2.51389e-05	164.821	0.633543			0.480831	0	5212	0.00235001	-0.00219298	963.174	1723.37		0.480831	0	5212	0.0192064	-0.000787275	281.864	648.339		0.480831	0	5212	0.0130747	0.00261159
0.316921	0	5223	0.0268337	0.0016395	-988.884	1607.19						0.316921	0	5223	0.00634063	0.00540661	4399.78	-2290.14		0.316921	0	5223	0.0011141	-1.77899e-05	53.4813	23.7071			0.316921	0	5223	0.00313433	-0.000185755	94.3879	-400.646		0.316921	0	5223	0.00544251	6.84817e-05	-733.987	-115.483		0.316921	0	5223	0.00474161	3.12755e-05
0.423285	0	5232	0.0229221	-0.00238116	-842.217	1294.02						0.423285	0	5232	0.0375934	0.0395611	-18520.1	-6236.36		0.423285	0	5232	0.000693416	0.000113736	122.315	-412.143			0.423285	0	5232	0.00139853	0.000213884	323.851	-233.695		0.423285	0	5232	0.00105048	-0.000175989	544.682	655.575		0.423285	0	5232	0.00443539	0.000855969
0.433981	0	5234	0.0976253	0.00142437	1009.35	-536.575						0.433981	0	5234	0.097585	-0.757326	71261.3	-137188		0.433981	0	5234	0.00174302	-9.45323e-05	205.728	92.4922			0.433981	0	5234	0.00679174	-3.99521e-05	22.7222	523.443		0.433981	0	5234	0.0168194	0.000363735	-449.341	-543.139		0.433981	0	5234	0.0192449	-0.00125735
0.418048	0	5248	0.103418	-0.00189702	-1467.69	-8737.89						0.418048	0	5248	1.16401	0.134311	49339.8	17805		0.418048	0	5248	0.00272173	-2.08205e-05	279.284	70.3302			0.418048	0	5248	0.00396418	-0.00133457	-84.1781	689.926		0.418048	0	5248	0.0199178	0.000693827	739.539	264.776		0.418048	0	5248	0.0125578	0.00224854
0.480733	0	5250	0.118922	0.00110821	-1029.54	-9097.07						0.480733	0	5250	0.549079	-0.531113	-58908.3	-106266		0.480733	0	5250	0.00122325	2.5243e-05	-417.521	166.978			0.480733	0	5250	0.00499901	-0.000360203	410.346	1142.85		0.480733	0	5250	0.00574216	0.00154379	2543.78	-2303.88		0.480733	0	5250	0.0196192	-0.00118938
0.394472	0	5253	0.0483688	0.00175474	-1388.38	6555.24						0.394472	0	5253	0.229631	-0.487026	-61157.1	6556.12		0.394472	0	5253	0.000317412	-7.03634e-05	-64.5637	31.8673			0.394472	0	5253	0.00482391	-0.000201391	371.473	-100.591		0.394472	0	5253	0.00442949	2.10463e-05	1173.26	137.843		0.394472	0	5253	0.0146649	-0.000171516
0.359902	0	5262	0.0809764	-0.00203453	-1003.98	277.545						0.359902	0	5262	1.08718	-0.655222	99214.6	-87472.4		0.359902	0	5262	0.00184334	-0.000433542	-194.333	416.451			0.359902	0	5262	0.00798562	-0.000120898	386.503	-518.041		0.359902	0	5262	0.00443958	-0.00249802	-280.259	1768.16		0.359902	0	5262	0.00944955	-0.00280345
0.39776	0	5272	0.0988462	0.00120392	422.076	171.673						0.39776	0	5272	0.281163	-0.34065	-15616.8	-158385		0.39776	0	5272	0.00178621	-0.000844871	1453.85	145.516			0.39776	0	5272	0.00651785	-0.000347722	-294.011	135.978		0.39776	0	5272	0.0167583	0.000270069	835.824	-2284.64		0.39776	0	5272	0.0203545	-0.00173901
0.426332	0	5283	0.0263993	0.0034258	-1018.06	-2799.98						0.426332	0	5283	0.0277156	0.0190637	-64107.8	2777.9		0.426332	0	5283	0.000470865	-6.54321e-05	109.468	31.9043			0.426332	0	5283	0.00112337	-0.000397871	62.6341	379.726		0.426332	0	5283	0.00167171	8.25082e-05	-249.749	129.139		0.426332	0	5283	0.00759569	0.000667284
0.394888	0	5299	0.0284311	0.00208259	-876.858	2626.01						0.394888	0	5299	0.0333857	-0.00624086	26851.5	1460.64		0.394888	0	5299	0.000659095	1.74563e-05	-115.69	28.0253			0.394888	0	5299	0.000793584	6.79871e-05	221.11	260.553		0.394888	0	5299	0.00107262	0.000642778	-93.6567	165.222		0.394888	0	5299	0.00331163	0.000112641
0.454899	0	5305	0.0532261	-0.0133525	-1558.38	-6078.29						0.454899	0	5305	0.578253	0.249239	-27753	206956		0.454899	0	5305	0.00097592	0.000169895	232.576	-557.973			0.454899	0	5305	0.00467654	4.6531e-05	-485.054	-70.7002		0.454899	0	5305	0.013742	0.000199203	-2965.31	-106.774		0.454899	0	5305	0.0125209	0.0156529
0.454599	0	5320	0.00188332	0.000836173	855.7	284.844						0.454599	0	5320	0.00348963	-0.00232252	-515.192	81.5377		0.454599	0	5320	2.71116e-05	6.13336e-06	-21.9671	-23.7452			0.454599	0	5320	0.000232344	0.000142968	20.5874	-33.736		0.454599	0	5320	0.000760817	0.000496284	-67.9851	44.0399		0.454599	0	5320	0.000193278	-0.000131725
0.426613	0	5325	0.128515	-0.00301671	881.213	-5298.81						0.426613	0	5325	1.01917	1.92629	0	-10376.7		0.426613	0	5325	0.00224466	-0.000893688	179.735	586.491			0.426613	0	5325	0.00579242	0.000246864	-191.651	-375.387		0.426613	0	5325	0.0193534	-0.000924268	10643.2	-4460.38		0.426613	0	5325	0.00725239	0.000169952
0.45905	0	5327	0.0272398	-0.000454643	-102.356	-417.292						0.45905	0	5327	0.074371	0.0123822	-15378.6	-58124.7		0.45905	0	5327	0.000593539	-4.17594e-05	-175.364	14.2942			0.45905	0	5327	0.0015829	-9.27882e-06	46.8236	104.576		0.45905	0	5327	0.008081	-0.000624774	-18.0424	891.931		0.45905	0	5327	0.021364	-0.00195698
0.35304	0	5328	0.0132843	0.00259544	-3317.82	1167.35						0.35304	0	5328	4.80906	-1.71309	0	-7106.22		0.35304	0	5328	0.00124003	-0.000282016	133.7	-287.595			0.35304	0	5328	0.00601375	-0.00209132	3536.16	-9581.01		0.35304	0	5328	0.0476738	-0.124181	-23393.9	-50874.6		0.35304	0	5328	0.0315779	-0.0451327
0.425777	0	5333	0.0394018	0.00234351	-2696.23	-1687.7						0.425777	0	5333	0.0517483	0.00901716	3204.11	-28694.1		0.425777	0	5333	0.00167266	-5.02501e-05	92.6521	0.0545547			0.425777	0	5333	0.00381758	-0.000291693	-162.211	241.886		0.425777	0	5333	0.0103575	0.000126547	285.337	95.3088		0.425777	0	5333	0.00280162	0.00204425
0.360269	0	5336	0.00569119	0.000555831	-399.25	3509.31						0.360269	0	5336	0.0142981	-0.00537873	8292.12	10885.4		0.360269	0	5336	0.000488119	-1.37954e-05	59.509	4.26068			0.360269	0	5336	0.000798992	7.7741e-06	-0.898994	55.7439		0.360269	0	5336	0.00270876	-3.807e-06	-481.142	11.41		0.360269	0	5336	0.000822139	-6.67715e-06
0.315128	0	5341	0.0396544	0.00125871	-509.119	4624.13						0.315128	0	5341	1.59096	-4.65848	-96328	13926		0.315128	0	5341	0.00128211	-0.000571691	50.2954	106.35			0.315128	0	5341	0.00267469	0.000772102	-499.014	-46.4341		0.315128	0	5341	0.00614284	-0.00160051	601.765	570.708		0.315128	0	5341	0.00830444	-0.000891212
0.458245	0	5352	0.0308181	0.00165398	-2721.69	-5366.24						0.458245	0	5352	2.63471	1.27802	376209	-134420		0.458245	0	5352	0.00314261	0.000780669	-849.045	-1278.62			0.458245	0	5352	0.00614796	0.00128748	-5.36658	-3509.61		0.458245	0	5352	0.0599389	-0.0797512	0.090946	-11972.9		0.458245	0	5352	0.716165	-2.09204
0.340927	0	5353	0.0704237	-0.00210462	48.1991	-1539.71						0.340927	0	5353	0.194747	-0.0102404	125733	105875		0.340927	0	5353	0.00129541	-2.79691e-05	-205.229	-64.617			0.340927	0	5353	0.00284128	-5.79891e-05	136.978	332.984		0.340927	0	5353	0.00988402	-0.000586748	-269.663	-421.812		0.340927	0	5353	0.00878219	0.00031164
0.428286	0	5357	0.087255	0.00284222	1317.17	-2373.76						0.428286	0	5357	0.502283	-0.438975	0	-10458.2		0.428286	0	5357	0.00140897	-0.000195143	176.971	-104.136			0.428286	0	5357	0.0112459	0.000387292	-477.338	453.053		0.428286	0	5357	0.0166593	-0.000167888	1335.74	-1661.68		0.428286	0	5357	0.0120728	-0.00282182
0.333145	0	5367	0.0212697	-0.000245317	-532.258	-930.79						0.333145	0	5367	0.0504282	0.0121091	-5694.21	-9341.52		0.333145	0	5367	0.000781531	-5.80911e-05	-11.1688	69.4382			0.333145	0	5367	0.00171244	-0.000151166	126.945	145.123		0.333145	0	5367	0.00472645	-0.000326739	186.092	117.121		0.333145	0	5367	0.011676	0.00397228
0.366012	0	5370	0.0896837	0.000859457	-503.461	896.243						0.366012	0	5370	1.12258	0.275092	-19287	-99820		0.366012	0	5370	0.00455729	-0.000130431	-198.494	92.8204			0.366012	0	5370	0.004028	0.000886	-541.289	-59.1452		0.366012	0	5370	0.0135095	-0.00171123	936.696	352.01		0.366012	0	5370	0.0046885	-0.00135671
0.412673	0	5382	0.0224475	0.00190662	-1293.09	11595.2						0.412673	0	5382	0.0318395	-0.0106734	1996.5	12574.3		0.412673	0	5382	0.00238467	0.000123154	-253.205	-289.142			0.412673	0	5382	0.00220163	0.000462938	-7.34663	-421.181		0.412673	0	5382	0.00899564	-0.00100464	-538.093	1904.19		0.412673	0	5382	0.00249745	-3.95801e-05
0.436256	0	5388	0.0604677	0.00123706	-1108.77	7307.75						0.436256	0	5388	0.0479487	-0.0238332	-20051.6	26508.1		0.436256	0	5388	0.000173295	-2.37845e-06	-80.6842	-6.41994			0.436256	0	5388	0.00417709	-0.000197936	-195.403	1.65004		0.436256	0	5388	0.00418317	-0.000537393	1711.3	-33.0571		0.436256	0	5388	0.0119784	0.000695361
0.309336	0	5389	0.0881921	0.00189916	93.8095	-1341.61						0.309336	0	5389	0.116622	0.0357088	-30993.9	-3778.57		0.309336	0	5389	0.000283157	2.25964e-05	-207.23	-148.176			0.309336	0	5389	0.00311471	-0.000136964	368.938	320.473		0.309336	0	5389	0.00543955	0.000848961	-164.673	-975.31		0.309336	0	5389	0.0135128	-0.000266909
0.371793	0	5399	0.00872785	0.000696851	-811.755	1252.91						0.371793	0	5399	0.0215863	-0.0022348	6737.6	2458.52		0.371793	0	5399	0.000367695	4.5149e-05	-63.0616	19.0517			0.371793	0	5399	0.000281274	-2.56889e-05	25.199	143.656		0.371793	0	5399	0.000373568	0.000240836	-159.167	101.035		0.371793	0	5399	0.00052048	-3.03237e-05
0.341453	0	5401	0.0151805	-0.000803681	349.419	4705.24						0.341453	0	5401	0.0884854	0.0246076	-33305.5	-43480.2		0.341453	0	5401	0.00145325	3.36446e-05	-24.4516	24.1358			0.341453	0	5401	0.000767658	-3.19134e-05	209.449	460.937		0.341453	0	5401	0.0102584	-0.000390268	1072.06	236.462		0.341453	0	5401	0.00192774	-0.000266021
0.492291	0	5410	0.0956505	-0.00156951	1007.33	-1317.33						0.492291	0	5410	1.53141	-0.375783	-257701	97493.5		0.492291	0	5410	0.00307845	0.000158733	52.8766	-407.853			0.492291	0	5410	0.00612662	0.00202922	-365.459	-569.478		0.492291	0	5410	0.0207291	0.000847349	2259.73	4553.15		0.492291	0	5410	0.00951123	-0.00329156
0.445453	0	5417	0.0606946	-0.00221093	-681.392	-385.623						0.445453	0	5417	0.0484105	-0.03744	-58931.6	-24446.8		0.445453	0	5417	0.00129118	2.99989e-05	302.671	41.0607			0.445453	0	5417	0.00829015	-3.59258e-05	184.982	-79.9515		0.445453	0	5417	0.0187009	-0.000838127	3600.68	-368.738		0.445453	0	5417	0.012239	0.00101874
0.362561	0	5421	0.0248422	-0.00648041	61.2147	278.939						0.362561	0	5421	0.0223327	0.00608677	8571.66	15717.5		0.362561	0	5421	0.000416216	-3.00491e-05	23.3578	-47.245			0.362561	0	5421	0.000642295	-0.000208951	14.15	-228.396		0.362561	0	5421	0.00333137	-0.000549088	304.781	-231.112		0.362561	0	5421	0.00786293	-0.000117303
0.364431	0	5428	0.0832184	0.000826051	1140.65	-1067.06						0.364431	0	5428	0.0585516	-0.0338103	-14533	-38788.3		0.364431	0	5428	0.00109114	9.10824e-05	3.15601	-89.8458			0.364431	0	5428	0.00494927	-0.00013592	389.185	-62.6108		0.364431	0	5428	0.0142125	-0.00486504	1958.4	-1886.93		0.364431	0	5428	0.00832558	-0.000677341
0.30469	0	5440	0.0174374	0.000337004	-577.466	4221.34						0.30469	0	5440	0.0263258	0.00586854	3317.46	-6322.83		0.30469	0	5440	0.00122221	-0.000190251	-140.214	62.6389			0.30469	0	5440	0.00366874	0.000205204	92.5885	-148.764		0.30469	0	5440	0.005648	0.000796806	-37.3567	-366.784		0.30469	0	5440	0.000600884	0.000482202
0.394486	0	5442	0.0744112	0.00212541	764.644	-1228.3						0.394486	0	5442	0.0299149	0.0160877	-93884	-27267.4		0.394486	0	5442	0.00157517	6.5998e-05	-62.5525	9.89858			0.394486	0	5442	0.00359187	0.000331169	-6.4131	-283.888		0.394486	0	5442	0.0107027	0.00130215	118.456	-391.546		0.394486	0	5442	0.00257987	-0.00131289
0.369944	0	5464	0.0612696	-0.000238986	-99.7448	341.587						0.369944	0	5464	0.0551133	0.0226005	6120.22	98174		0.369944	0	5464	0.00160897	-2.67276e-05	6.37362	-12.8238			0.369944	0	5464	0.00507322	-9.51353e-05	-203.827	275.39		0.369944	0	5464	0.00945615	0.000169678	-244.252	-1907.32		0.369944	0	5464	0.0127495	0.000463313
0.372613	0	5470	0.0235637	0.000815952	-1167.67	-305.923						0.372613	0	5470	3.0074	2.72659	352431	376754		0.372613	0	5470	0.00215896	0.000200096	-78.8461	99.0851			0.372613	0	5470	0.0155577	-0.0037022	433.696	-10764.1		0.372613	0	5470	0.0541989	0.0246303	1629.83	-9796.68		0.372613	0	5470	0.040839	-0.0755514
0.373194	0	5471	0.0343421	-0.00528501	271.841	4328.76						0.373194	0	5471	2.21572	-2.35741	0	-7940.72		0.373194	0	5471	0.00218415	1.88192e-06	-191.239	146.805			0.373194	0	5471	0.0145773	0.000328799	-2407.18	-946.532		0.373194	0	5471	0.0252129	0.0302094	685.694	-5865.68		0.373194	0	5471	0.127747	-0.149632
0.471119	0	5481	0.0640939	0.00159686	3092.92	3221.14						0.471119	0	5481	0.0130902	-0.0130245	-3839.19	-39702.1		0.471119	0	5481	0.000708169	-4.60901e-05	19.6019	-2.61646			0.471119	0	5481	0.00327855	9.01722e-05	-445.096	-365.256		0.471119	0	5481	0.00265633	-0.000520795	375.124	658.304		0.471119	0	5481	0.00162333	-0.000244657
0.393399	0	5482	0.0173527	-0.0036335	2387.85	3247.48						0.393399	0	5482	0.0418021	0.000317687	20464.7	-12255.1		0.393399	0	5482	0.000313619	-5.98364e-06	20.7139	25.5907			0.393399	0	5482	0.00122387	-9.38756e-05	44.482	44.2602		0.393399	0	5482	0.00325956	0.000357395	-9.16792	-578.6		0.393399	0	5482	0.00316046	-0.000127396
0.383013	0	5488	0.0375564	0.000664508	-284.259	-760.176						0.383013	0	5488	0.00712636	-0.000443728	-1269.7	-901.435		0.383013	0	5488	0.000355917	-0.000178383	85.744	44.6562			0.383013	0	5488	0.00318755	-0.000606627	-99.1463	18.066		0.383013	0	5488	0.0080801	4.16616e-05	-651.11	458.868		0.383013	0	5488	0.00472187	-0.000417286
0.483141	0	5493	0.00867261	0.00108597	151.965	700.933						0.483141	0	5493	0.00872897	-0.00406894	4382.47	16874.5		0.483141	0	5493	0.000246761	8.375e-06	44.2653	13.9892			0.483141	0	5493	0.000740819	6.28487e-05	132.951	109.505		0.483141	0	5493	0.00140163	-0.000191092	209.627	-82.3229		0.483141	0	5493	0.00201521	0.000333723
0.370201	0	5496	0.0938408	-0.00388894	-415.542	910.982						0.370201	0	5496	0.123178	0.0259387	-40288.6	-29893.4		0.370201	0	5496	0.00128115	5.13129e-05	38.4375	-54.0805			0.370201	0	5496	0.00341678	0.000398681	-502.246	-997.133		0.370201	0	5496	0.00517957	0.00017697	82.01	-1115.81		0.370201	0	5496	0.00107159	-0.000265939
0.348057	0	5502	0.0455896	-0.00552546	-907.667	-1514.03						0.348057	0	5502	0.241116	0.879351	34255.3	-5736.87		0.348057	0	5502	0.00111083	3.59688e-05	-23.1885	-60.7541			0.348057	0	5502	0.00338247	-0.000151502	-417.344	289.402		0.348057	0	5502	0.014132	-0.000373699	-1171.03	374.486		0.348057	0	5502	0.0124682	0.00551392
0.310438	0	5512	0.00148587	0.000769425	243.734	22.666						0.310438	0	5512	0.000362443	0.000593997	190.164	155.707		0.310438	0	5512	0.000208932	0.000162679	34.9621	9.22038			0.310438	0	5512	0.000243189	4.37451e-05	-26.775	-31.0141		0.310438	0	5512	0.00139589	-0.000922588	25.8626	26.0143		0.310438	0	5512	0.00109315	0.000106927
0.473592	0	5515	0.0327237	-0.000546695	813.122	-684.812						0.473592	0	5515	0.0805232	-0.0212276	-2268.67	-27281.2		0.473592	0	5515	0.000846735	-4.74548e-05	350.165	81.3805			0.473592	0	5515	0.00504274	0.000241028	-169.389	-990.968		0.473592	0	5515	0.00967001	-0.00174568	3129.81	604.347		0.473592	0	5515	0.00943266	-0.0011788
0.3971	0	5529	0.00261005	-3.83734e-05	54.8951	-87.6063						0.3971	0	5529	0.0149661	0.0108108	7607.02	8238.54		0.3971	0	5529	7.21535e-05	1.0747e-05	-26.9132	1.87919			0.3971	0	5529	0.000161446	-0.000159632	99.9148	-18.1826		0.3971	0	5529	0.000694884	0.000616243	195.985	-112.28		0.3971	0	5529	0.000746994	0.000684167
0.488922	0	5534	0.0185401	0.000182798	417.129	-499.705						0.488922	0	5534	0.0630331	-0.0112993	5366.51	21147		0.488922	0	5534	0.000621913	-2.75792e-05	60.1587	-54.4356			0.488922	0	5534	0.00109759	-0.000222142	216.611	-112.857		0.488922	0	5534	0.00101664	0.000312859	-2347.27	-1137.91		0.488922	0	5534	0.00214408	0.00111228
0.329629	0	5537	0.0510221	-0.0014296	-388.186	-2715.13						0.329629	0	5537	0.0278854	0.0153978	33360.8	-33891.8		0.329629	0	5537	0.00154009	0.010202	1409.29	-27.1312			0.329629	0	5537	0.00080938	-0.0132697	-7524.15	880.832		0.329629	0	5537	0.00363021	-5.794e-05	998.327	-76.5269		0.329629	0	5537	0.0070175	-0.0079375
0.428023	0	5547	0.0715568	0.000582984	-695.159	936.422						0.428023	0	5547	0.0687232	-0.0178592	20668.5	-44248.1		0.428023	0	5547	0.000927534	-8.69567e-06	16.4524	-44.4671			0.428023	0	5547	0.00199133	-1.72179e-05	-188.815	-899.657		0.428023	0	5547	0.00306541	0.000226553	-338.166	-932.247		0.428023	0	5547	0.00510722	-0.000255143
0.461549	0	5562	0.0159008	0.00230051	-3367.5	6385.11						0.461549	0	5562	0.0272981	0.00273146	1321.29	-3951.56		0.461549	0	5562	0.000696608	6.69847e-05	114.179	28.3765			0.461549	0	5562	0.00281134	-0.000104571	277.021	-818.672		0.461549	0	5562	0.00512996	7.12797e-05	-1893.45	495.446		0.461549	0	5562	0.00434828	-0.000209679
0.477326	0	5563	0.0156695	0.00153488	-946.818	-7120.46						0.477326	0	5563	4.53941	0.596321	0	-12990.3		0.477326	0	5563	0.00271095	0.000156143	-1416.91	411.279			0.477326	0	5563	0.00662943	0.00083311	832.922	-2370.81		0.477326	0	5563	0.0184957	0.00238245	3986.26	4524.91		0.477326	0	5563	0.0221463	0.00574525
0.490495	0	5582	0.0350857	-0.000682924	3739.92	8238.16						0.490495	0	5582	0.014631	0.00472847	-35835	-25797.4		0.490495	0	5582	0.00022531	1.59702e-05	90.8927	47.0208			0.490495	0	5582	0.00235458	-0.000238465	149.501	206.802		0.490495	0	5582	0.00475585	0.000364585	886.93	-1708.69		0.490495	0	5582	0.0085845	-0.000203558
0.350144	0	5589	0.0228117	-0.00087645	1045.65	56.0811						0.350144	0	5589	1.05797	-2.23991	-221886	174061		0.350144	0	5589	0.00118164	7.19313e-05	70.0006	-34.7576			0.350144	0	5589	0.00749117	0.000945894	-230.122	-492.344		0.350144	0	5589	0.0133006	-0.000943348	7081.64	-1632.16		0.350144	0	5589	0.0324714	0.00469655
0.417682	0	5590	0.0691694	-0.000951245	-880.857	-394.304						0.417682	0	5590	0.188254	0.201248	0	-9946.77		0.417682	0	5590	0.000921176	0.000154051	-33.8317	-204.603			0.417682	0	5590	0.00917742	0.000576884	-696.402	-564.048		0.417682	0	5590	0.019384	-0.00111739	-1107.48	-131.353		0.417682	0	5590	0.00649528	0.000818542
0.378405	0	5591	0.0308012	5.03319e-05	658.68	137.536						0.378405	0	5591	0.0446241	0.00796316	-30602.9	-16667.2		0.378405	0	5591	0.000360522	-6.71294e-05	-75.9955	-187.783			0.378405	0	5591	0.00113174	-2.30601e-05	-56.3098	160.608		0.378405	0	5591	0.00653001	-0.0011519	614.58	-1535.91		0.378405	0	5591	0.00442304	0.00176256
0.387503	0	5602	0.0125501	-0.000493384	772.293	448.192						0.387503	0	5602	0.0158957	0.00925336	-19658.2	28908.6		0.387503	0	5602	0.000260555	-4.82798e-05	-21.0426	19.8951			0.387503	0	5602	0.00119079	-0.000244361	-112.779	52.913		0.387503	0	5602	0.00297132	0.000459873	402.064	335.46		0.387503	0	5602	0.00282601	-0.000778808
0.398655	0	5614	0.00755211	0.000582552	-420.089	5701.38						0.398655	0	5614	0.0113496	0.000744041	-2283.77	-57.5236		0.398655	0	5614	0.000765664	9.22294e-06	-39.3854	32.5518			0.398655	0	5614	0.00172906	-3.8346e-07	55.9445	120.041		0.398655	0	5614	0.00232409	0.000123978	-1064.86	-1029.43		0.398655	0	5614	0.0030736	-6.34343e-05
0.417107	0	5617	0.0184841	0.00138416	-749.828	1256.19						0.417107	0	5617	0.0280076	-0.0331259	27264.6	-7863.65		0.417107	0	5617	0.000568893	6.32927e-05	-58.2428	-49.7423			0.417107	0	5617	0.00109494	0.000167701	205.978	-205.676		0.417107	0	5617	0.000921604	-0.000291149	219.798	639.94		0.417107	0	5617	0.00410361	0.00120306
0.447345	0	5621	0.0211102	2.00262e-05	2170.77	-932.986						0.447345	0	5621	0.0186317	0.000361784	983.289	-2931.4		0.447345	0	5621	0.000440378	-3.77032e-05	-86.0779	-221.932			0.447345	0	5621	0.00269128	0.000211195	-29.9773	-381.22		0.447345	0	5621	0.00696228	0.00033415	-62.2203	387.133		0.447345	0	5621	0.00139304	0.00015455
0.497037	0	5631	0.0403599	-0.000309826	-1745.22	4556.07						0.497037	0	5631	0.0835211	0.00194607	-64525.7	-18051.6		0.497037	0	5631	0.000907083	4.36287e-05	-132.381	116.314			0.497037	0	5631	0.00212732	0.000109878	114.14	-526.567		0.497037	0	5631	0.00231178	1.43197e-05	-319.468	1780.78		0.497037	0	5631	0.0052258	-0.000194684
0.338992	0	5640	0.0702872	-0.00424404	-975.949	-1096.1						0.338992	0	5640	0.0607907	0.0764854	-18656	-174288		0.338992	0	5640	0.000325008	0.000290953	388.936	-33.3533			0.338992	0	5640	0.00218853	0.000757946	120.872	-351.111		0.338992	0	5640	0.00846267	0.00018975	200.299	-1121.57		0.338992	0	5640	0.00704593	0.000630437
0.34156	0	5645	0.0440442	0.00176301	537.331	1517.04						0.34156	0	5645	0.0932207	0.0308469	9853.68	-33131.1		0.34156	0	5645	0.00162187	-0.00102955	420.405	-1279.03			0.34156	0	5645	0.00216678	0.000592701	-1051.08	1297.61		0.34156	0	5645	0.00303888	0.000468993	1298.19	-1195.95		0.34156	0	5645	0.00412875	0.00170106
0.479639	0	5657	0.0870801	-0.00244351	-1030.99	2144.63						0.479639	0	5657	0.462254	-0.6319	237663	-56432.8		0.479639	0	5657	0.00025996	-0.000150398	-803.66	85.4627			0.479639	0	5657	0.00550319	-0.000154029	1685.39	297.29		0.479639	0	5657	0.0128285	0.000578556	2819.74	5605.39		0.479639	0	5657	0.0228272	-6.05552e-05
0.489623	0	5677	0.0571039	0.0001665	91.9379	-977.534						0.489623	0	5677	0.1315	0.0620965	19563.7	13432.9		0.489623	0	5677	0.00211248	0.000877372	-753.736	-368.388			0.489623	0	5677	0.00365909	0.00171352	1647.62	-84.4288		0.489623	0	5677	0.00634206	-0.000644698	4337.24	2822.61		0.489623	0	5677	0.00636439	-0.00234181
0.490554	0	5683	0.0454525	0.00393038	-3338.45	-3023.48						0.490554	0	5683	1.98812	0.115361	233360	382912		0.490554	0	5683	0.00474354	-0.000115833	1054.85	-136.93			0.490554	0	5683	0.00529821	0.00421169	116.651	-3410.71		0.490554	0	5683	0.0222183	-0.00393657	-686.91	-11395.5		0.490554	0	5683	0.726779	0.603926
0.375332	0	5695	0.0984554	0.00126543	-1464.59	-4942.86						0.375332	0	5695	0.222852	0.528297	7855.9	-59541.1		0.375332	0	5695	0.00159781	-2.81187e-05	-66.447	-125.733			0.375332	0	5695	0.0032916	-0.000576857	25.2265	532.818		0.375332	0	5695	0.00791983	0.000717725	-3450.97	1257.51		0.375332	0	5695	0.0273747	-0.000500975
0.354693	0	5698	0.0493945	1.71335e-05	-52.5963	-998.723						0.354693	0	5698	0.0513259	-0.00616274	18950.5	-13146.2		0.354693	0	5698	0.000325584	-5.64306e-05	5.58867	-239.327			0.354693	0	5698	0.00173512	-3.2167e-05	95.6863	381.43		0.354693	0	5698	0.00245633	-0.000579179	20.0406	-913.646		0.354693	0	5698	0.00163759	0.000446027
0.367651	0	5702	0.0157705	0.00220486	1560.28	3918.1						0.367651	0	5702	0.0124275	0.00833285	-5680.46	5385.92		0.367651	0	5702	0.000270292	-2.24367e-05	62.8012	-45.2685			0.367651	0	5702	0.00209296	0.000201351	232.985	-364.867		0.367651	0	5702	0.00654947	-8.5787e-05	342.47	-29.1056		0.367651	0	5702	0.00111414	-5.5524e-05
0.305344	0	5715	0.0566943	0.00209698	-123.577	-613.503						0.305344	0	5715	0.0675362	0.0431691	-419.064	36740.4		0.305344	0	5715	0.00323363	-0.000342672	75.3854	94.6879			0.305344	0	5715	0.00421674	-0.000200238	8.95574	-111.466		0.305344	0	5715	0.0149007	-0.000780912	-325.257	227.761		0.305344	0	5715	0.00965922	-1.75634e-05
0.307909	0	5717	0.00149483	3.56451e-05	21.8115	17.0387						0.307909	0	5717	0.000503896	-0.000123944	314.793	-40.2331		0.307909	0	5717	1.29085e-05	-2.92606e-06	1.23019	-0.124852			0.307909	0	5717	3.92732e-05	-1.1283e-05	-2.23437	-2.3267		0.307909	0	5717	5.13829e-05	1.2346e-05	5.84965	-1.12196		0.307909	0	5717	0.000351385	-0.000142888
0.472418	0	5720	0.00495086	0.000312263	80.9254	3139.93						0.472418	0	5720	0.0172654	-0.00404045	-7079.35	3355.79		0.472418	0	5720	0.000609604	-2.70809e-05	81.1292	-53.1182			0.472418	0	5720	0.000488117	1.35418e-05	-26.2861	-58.3089		0.472418	0	5720	0.00135941	0.000202286	723.285	-61.9		0.472418	0	5720	0.0018136	0.000159262
0.490222	0	5724	0.00430518	0.00190589	-490.654	-4958.78						0.490222	0	5724	2.7688	0.391863	-10763.8	388435		0.490222	0	5724	0.00113006	0.000171428	-948.422	7.01356			0.490222	0	5724	0.0103446	0.000558864	730.525	-2141.88		0.490222	0	5724	0.0318615	-0.00182819	378.146	7241.62		0.490222	0	5724	0.0288354	0.00456193
0.485474	0	5725	0.0370128	-0.00830167	-2011.2	-6847.15						0.485474	0	5725	0.0142486	0.256807	55848.8	216762		0.485474	0	5725	0.000921619	0.000132005	194.964	-547.741			0.485474	0	5725	0.0043362	3.73743e-05	-655.395	64.1299		0.485474	0	5725	0.0136635	-0.000263201	-2766.59	569.618		0.485474	0	5725	0.0111038	0.000249859
0.341488	0	5726	0.00152061	-0.000673627	-16.473	13.1986						0.341488	0	5726	0.0095618	0.0104325	39.8098	-4567.38		0.341488	0	5726	7.97049e-05	-4.28806e-05	3.91051	-6.53625			0.341488	0	5726	0.000267723	0.000256183	-35.728	-5.37662		0.341488	0	5726	0.000206725	-0.000199698	-16.8827	-85.6839		0.341488	0	5726	0.000290824	-0.000240368
0.366304	0	5727	0.110455	0.000924008	-644.154	-4601.43						0.366304	0	5727	0.902379	-0.729651	0	-7650.23		0.366304	0	5727	0.00114632	4.84479e-06	-361.606	-30.9677			0.366304	0	5727	0.00337422	-0.000367784	511.953	900.539		0.366304	0	5727	0.00447683	0.00201873	-1195.56	-709.725		0.366304	0	5727	0.0188139	-0.00154047
0.493068	0	5737	0.0889044	0.00123673	-1631.41	-7273.74						0.493068	0	5737	0.246241	0.835569	0	-13861.3		0.493068	0	5737	0.00296096	8.26219e-05	135.475	-492.147			0.493068	0	5737	0.00582722	-0.000288528	-260.264	99.4702		0.493068	0	5737	0.00877289	-0.0031712	2929.86	-635.602		0.493068	0	5737	0.0291199	-0.00690707
0.473789	0	5741	0.000762915	-2.49431e-05	242.379	-298.566						0.473789	0	5741	0.00145118	0.000793603	1887.59	-543.21		0.473789	0	5741	7.99897e-05	1.3635e-05	-45.3099	-49.4939			0.473789	0	5741	0.000653519	-0.000137883	-46.6161	-63.6523		0.473789	0	5741	0.0012905	-0.000169771	278.137	95.6234		0.473789	0	5741	0.000198445	1.52107e-05
0.336849	0	5751	0.01254	0.00444498	380.933	1205.48						0.336849	0	5751	0.113242	0.0805658	-99353.2	-65143.1		0.336849	0	5751	7.27928e-05	-8.26084e-05	-9.85851	61.0963			0.336849	0	5751	0.00211654	-0.000493739	-275.354	91.8378		0.336849	0	5751	0.00513103	0.000381569	-312.955	165.453		0.336849	0	5751	0.0203738	-0.00185723
0.316303	0	5752	0.0301146	-0.00155425	453.865	-124.322						0.316303	0	5752	0.0902789	-0.137383	26768.3	-33717.1		0.316303	0	5752	0.000826684	-0.000341395	167.051	-108.858			0.316303	0	5752	0.00203818	-0.000736027	-273.785	-97.5673		0.316303	0	5752	0.0068002	-0.000499856	-1732.27	-342.37		0.316303	0	5752	0.00349476	0.00793322
0.302423	0	5760	0.131306	0.00223566	-225.967	-4236.38						0.302423	0	5760	0.139642	-0.264249	-49284.2	-114567		0.302423	0	5760	0.00199141	0.000861847	244.867	-141.958			0.302423	0	5760	0.00534464	0.00188182	123.464	-549.716		0.302423	0	5760	0.00219468	-0.00289285	-979.61	762.235		0.302423	0	5760	0.00530709	-0.00322148
0.333734	0	5767	0.2073	-0.548698	618.575	441.978						0.333734	0	5767	0.00919441	0.00643754	4491.93	-7090.82		0.333734	0	5767	0.000110012	5.29946e-05	-10.6288	-10.4583			0.333734	0	5767	0.000300904	-0.000105964	14.316	-27.121		0.333734	0	5767	0.00107384	0.00168384	300.877	59.2542		0.333734	0	5767	0.00111364	0.00218199
0.306348	0	5768	0.0478616	-0.0020894	272.084	-615.276						0.306348	0	5768	0.0836272	-0.105543	8433.91	2115.79		0.306348	0	5768	0.0011733	-1.57989e-05	-58.3058	-76.9273			0.306348	0	5768	0.00373881	0.000813969	-87.7161	-564.259		0.306348	0	5768	0.00728271	-0.00146167	-798.455	-652.812		0.306348	0	5768	0.00859923	-0.00141044
0.40192	0	5786	0.0844626	-0.0171134	-1059.28	-5885.23						0.40192	0	5786	0.0681942	0.0501939	-73193.1	1014.72		0.40192	0	5786	0.00218923	3.87855e-05	-93.7387	-154.996			0.40192	0	5786	0.00260339	0.000135024	-389.782	-370.676		0.40192	0	5786	0.004692	0.000476586	377.545	230.139		0.40192	0	5786	0.0115619	-0.000166849
0.432179	0	5788	0.010695	-0.000874799	712.415	65.0581						0.432179	0	5788	0.0210784	0.00053398	-355.283	-3697.14		0.432179	0	5788	0.00166732	0.000118647	250.737	340.867			0.432179	0	5788	0.00260386	9.38423e-05	-649.95	-412.376		0.432179	0	5788	0.00720955	4.82481e-05	-1089.1	284.192		0.432179	0	5788	0.00596175	0.000391733
0.43158	0	5793	0.0230035	0.00568303	-1772.85	-5736.68						0.43158	0	5793	3.39677	-0.76413	0	-10619.7		0.43158	0	5793	0.00412438	-0.000309356	-600.092	727.902			0.43158	0	5793	0.00560481	0.000387863	663.734	-3444.27		0.43158	0	5793	0.015653	0.0130976	-107486	-17315.8		0.43158	0	5793	0.115349	-0.0900021
0.413022	0	5804	0.0935109	0.000658068	1082.16	151.234						0.413022	0	5804	0.322844	-1.08807	213397	19345.7		0.413022	0	5804	0.00206812	-0.000102246	57.2937	130.846			0.413022	0	5804	0.0061723	-0.000634735	-367.591	-163.78		0.413022	0	5804	0.0151223	0.000564358	-615.131	-1863.23		0.413022	0	5804	0.0196695	0.00012736
0.386714	0	5809	0.0948024	0.000706106	-261.296	-3187.36						0.386714	0	5809	0.0975961	-0.0159613	-144090	50689.2		0.386714	0	5809	0.000568069	0.000113602	-508.301	-190.14			0.386714	0	5809	0.00336085	-0.000111654	671.363	647.689		0.386714	0	5809	0.00273968	0.000933051	177.261	-191.219		0.386714	0	5809	0.0135279	-0.000144488
0.468439	0	5815	0.0285465	-0.00885644	-2301.53	-4669.12						0.468439	0	5815	0.00792533	0.00266356	31605.9	-56847		0.468439	0	5815	0.000371995	9.41744e-05	-189.026	56.8403			0.468439	0	5815	0.000423795	9.08645e-05	-41.1551	-236.522		0.468439	0	5815	0.00194729	0.000247975	-255.759	-210.803		0.468439	0	5815	0.00642806	-0.00223539
0.320928	0	5821	0.0269969	-0.00115741	704.173	-214.801						0.320928	0	5821	0.635246	0.241903	-38918.1	212018		0.320928	0	5821	0.000982794	-7.15908e-05	180.362	-12.8571			0.320928	0	5821	0.00712961	-9.18164e-05	896.22	138.995		0.320928	0	5821	0.0150057	0.00208943	1377.03	-3110.86		0.320928	0	5821	0.0422192	0.00421321
0.427545	0	5823	0.0298022	0.000131565	-271.271	-657.139						0.427545	0	5823	0.0675384	-0.0610342	-31158.9	8599.95		0.427545	0	5823	0.000602094	-0.000123599	120.128	220.091			0.427545	0	5823	0.00555913	7.07106e-06	-43.0538	-690.296		0.427545	0	5823	0.0101116	0.00182841	1273.81	-2576.24		0.427545	0	5823	0.0117427	-0.000101015
0.319963	0	5825	0.0672703	-0.000220791	166.681	546.741						0.319963	0	5825	1.24947	-2.58294	0	-5837		0.319963	0	5825	0.00185967	0.000797162	-0.546739	84.9884			0.319963	0	5825	0.00455427	-0.00063832	50.0041	32.1824		0.319963	0	5825	0.0177649	-0.0111903	-1088.92	1319.27		0.319963	0	5825	0.0119245	0.00349155
0.302034	0	5836	0.0174302	0.00088363	448.224	-639.941						0.302034	0	5836	2.23692	-2.98063	4316.14	86011.2		0.302034	0	5836	0.00339874	-0.000418044	63.4385	349.282			0.302034	0	5836	0.169534	0.122507	-60381.3	17207.7		0.302034	0	5836	0.0543501	0.0633427	-32041.5	5771.58		0.302034	0	5836	0.608622	-1.58696
0.445224	0	5851	0.0390484	0.000154495	1704.23	-3851.24						0.445224	0	5851	0.0258357	0.000234209	-8604.58	1032.67		0.445224	0	5851	0.00138488	-7.53801e-05	180.56	-229.643			0.445224	0	5851	0.00663545	-2.20113e-05	79.2991	277.352		0.445224	0	5851	0.0107813	0.000776848	-1748.32	442.785		0.445224	0	5851	0.00396148	0.000534757
0.429155	0	5872	0.0273927	0.00124579	-799.129	2844.81						0.429155	0	5872	0.0283204	0.00515838	7504.13	6313.21		0.429155	0	5872	0.000670414	-2.07214e-05	-128.469	26.0982			0.429155	0	5872	0.000979083	9.27114e-05	221.363	126.813		0.429155	0	5872	0.00213121	0.000742262	-8.46069	158.279		0.429155	0	5872	0.00443887	-3.25869e-05
0.333335	0	5898	0.0751255	0.00106089	-735.333	-1206.83						0.333335	0	5898	0.0761154	0.0166568	-18250	23763.3		0.333335	0	5898	0.00215282	6.923e-05	109.015	-142.185			0.333335	0	5898	0.00481213	-0.0016719	551.093	479.901		0.333335	0	5898	0.00989868	0.00103255	-637.817	-1558.73		0.333335	0	5898	0.00836503	0.00138888
0.394069	0	5904	0.0113051	-0.000906148	1043.28	-2461.52						0.394069	0	5904	0.0124039	-0.00113951	-4568.71	702.677		0.394069	0	5904	0.000300076	-9.66146e-06	-3.01885	34.132			0.394069	0	5904	0.0011362	0.000147369	5.76467	52.7681		0.394069	0	5904	0.0034425	0.000315086	-283.179	17.2042		0.394069	0	5904	0.00173715	-1.01781e-07
0.48147	0	5905	0.0288868	0.000194641	1489.1	9317.09						0.48147	0	5905	0.0276934	-0.00997538	-38791.3	38124		0.48147	0	5905	0.000259268	-4.35014e-06	171.146	-30.8292			0.48147	0	5905	0.0026765	-0.000176542	830.318	-361.314		0.48147	0	5905	0.00479001	-3.51757e-06	404.824	-841.483		0.48147	0	5905	0.00703728	-0.000793056
0.307772	0	5920	0.00880399	-2.12373e-05	62.3781	2952.1						0.307772	0	5920	0.0521074	0.00153372	2540.71	2825.15		0.307772	0	5920	0.000801089	6.05247e-05	-16.9797	-7.43717			0.307772	0	5920	0.000424346	1.78713e-05	194.902	31.8533		0.307772	0	5920	0.00765007	1.4863e-05	317.78	173.402		0.307772	0	5920	0.00325154	7.89015e-05
0.381895	0	5921	0.0504789	0.000180019	1273.52	-836.855						0.381895	0	5921	0.0355194	0.0472433	36143.9	3601.16		0.381895	0	5921	0.00203517	2.27965e-05	-21.4955	43.1697			0.381895	0	5921	0.00234912	0.000128569	53.4116	-208.834		0.381895	0	5921	0.0106358	-0.000275477	1585.68	-115.136		0.381895	0	5921	0.00520619	-0.000677566
0.429697	0	5930	0.026688	0.000380504	965.41	-690.068						0.429697	0	5930	0.0793865	-0.0164941	-7448.33	15515.1		0.429697	0	5930	0.000162075	-5.77134e-05	-192.644	-46.022			0.429697	0	5930	0.00258358	1.14807e-05	-197.413	44.2054		0.429697	0	5930	0.00107065	-0.000339273	594.062	-226.087		0.429697	0	5930	0.00660846	0.000588572
0.348438	0	5931	0.0879054	-0.00106027	-795.721	-223.053						0.348438	0	5931	1.15587	-6.31345	81850.5	334565		0.348438	0	5931	0.000571186	-1.99443e-05	322.688	-167.687			0.348438	0	5931	0.00263378	-0.000349223	-7.22733	140.774		0.348438	0	5931	0.0186795	0.00127106	-1934.4	726.406		0.348438	0	5931	0.00468369	0.000673507
0.308338	0	5942	0.11227	0.00193334	941.064	-2533.12						0.308338	0	5942	1.1413	0.470476	-74078.3	-25807.5		0.308338	0	5942	0.00212378	0.000333671	999.257	214.75			0.308338	0	5942	0.0117701	0.000113168	-446.346	926.656		0.308338	0	5942	0.00709689	0.00512487	-2220.84	-4244		0.308338	0	5942	0.0123198	-0.00713516
0.368592	0	5953	0.0183371	-0.00147736	1072.76	-3859						0.368592	0	5953	0.027619	-0.00328341	-561.443	1279.7		0.368592	0	5953	0.000452206	8.73126e-06	60.0922	-85.6149			0.368592	0	5953	0.00455931	9.84377e-05	179.858	208.937		0.368592	0	5953	0.00812783	0.000204518	-628.767	-204.66		0.368592	0	5953	0.00153848	0.000289931
0.427152	0	5958	0.020233	0.00553828	541.074	-10890.8						0.427152	0	5958	0.685755	0.824289	-86598	-300808		0.427152	0	5958	0.00147761	8.7461e-05	144.154	72.3238			0.427152	0	5958	0.00164716	2.61746e-05	433.906	-77.773		0.427152	0	5958	0.00879117	0.00191767	-630.227	-1247.32		0.427152	0	5958	0.00230747	-0.00132228
0.405919	0	5966	0.0022366	0.000852306	156.679	1654.32						0.405919	0	5966	0.0135918	-0.00745251	4935.65	1552.15		0.405919	0	5966	0.000414857	-0.000169915	71.3552	-17.3908			0.405919	0	5966	0.000369506	0.000163926	-28.2658	-12.0121		0.405919	0	5966	0.000851964	0.000372703	392.115	-16.0963		0.405919	0	5966	0.00118783	0.000542977
0.430091	0	5990	0.087957	-0.00189093	-620.433	-1646.68						0.430091	0	5990	0.511744	0.171086	41326.3	-63552.9		0.430091	0	5990	0.002138	0.000114328	282.581	112.093			0.430091	0	5990	0.0111674	-0.000149842	425.434	89.6098		0.430091	0	5990	0.0224757	-4.75567e-05	386.979	-1543.47		0.430091	0	5990	0.00919086	0.000844535
0.395574	0	5995	0.00108445	-9.55613e-05	-378.377	386.992						0.395574	0	5995	2.39732	-5.88753	0	-8921.65		0.395574	0	5995	0.000719101	-0.000504359	-54.3089	-40.7321			0.395574	0	5995	0.0355518	0.00258865	1134.81	475.523		0.395574	0	5995	0.0112153	-0.00338265	-25254.2	16083.4		0.395574	0	5995	0.00536033	0.00152685
0.483333	0	6004	0.0172715	0.000289958	-81.6199	10200.2						0.483333	0	6004	0.0164239	0.00609916	-42143.2	46484.8		0.483333	0	6004	0.00126443	-7.96843e-06	118.751	-40.7839			0.483333	0	6004	0.00108656	-7.8683e-06	138.973	-353.639		0.483333	0	6004	0.00581896	-9.90979e-05	2035.77	231.75		0.483333	0	6004	0.00758034	-0.00053712
0.396752	0	6013	0.0870364	-0.00133733	-963.688	-2393.38						0.396752	0	6013	0.40874	-0.0299136	-68569.5	-99628		0.396752	0	6013	0.00266024	7.67988e-05	-255.03	2.62189			0.396752	0	6013	0.00197243	-0.000269293	-609.243	-339.572		0.396752	0	6013	0.00633939	0.00153437	3185.59	-774.191		0.396752	0	6013	0.0173265	-0.000902809
0.381991	0	6015	0.0361944	-0.00357681	1364	4963.11						0.381991	0	6015	2.3602	0.789232	-116775	-132986		0.381991	0	6015	0.000728608	0.000317716	-333.116	11.617			0.381991	0	6015	0.00663286	0.00061731	-56.1785	-108.476		0.381991	0	6015	0.0219444	-0.00349934	-3839.79	-1298.36		0.381991	0	6015	0.0100119	-0.0464466
0.407091	0	6016	0.0243924	0.00101567	218.653	7571.27						0.407091	0	6016	0.016666	0.00464969	-32415.8	-5208.37		0.407091	0	6016	0.00052015	4.6932e-06	118.489	-24.5483			0.407091	0	6016	0.00228499	5.95407e-06	540.888	-360.343		0.407091	0	6016	0.00458151	9.7014e-05	499.365	-424.697		0.407091	0	6016	0.00775718	-0.000386859
0.3452	0	6023	0.0662517	0.000165065	323.61	-1625.74						0.3452	0	6023	0.0495834	0.0166301	-22706.6	-26166		0.3452	0	6023	0.00237744	-0.00336136	1058.74	-4122.08			0.3452	0	6023	0.00455301	-0.0400769	-2089.39	-10915.5		0.3452	0	6023	0.00221072	-0.00123705	5426.05	-2312.14		0.3452	0	6023	0.00994164	-0.0134969
0.358331	0	6025	0.00268066	-0.000881586	335.378	-384.254						0.358331	0	6025	0.00367161	-0.00174069	454.236	-595.169		0.358331	0	6025	0.000888742	1.61976e-05	126.976	28.7656			0.358331	0	6025	0.000924601	-1.64914e-05	-133.231	-204.897		0.358331	0	6025	0.00697353	6.84268e-06	370.636	336.296		0.358331	0	6025	0.00552015	-0.000403962
0.430013	0	6027	0.0460579	-0.00309684	-1098.14	-302.999						0.430013	0	6027	0.0917832	-0.0463167	-24633.7	70714.6		0.430013	0	6027	0.000408064	1.28187e-05	-248.845	-2.05989			0.430013	0	6027	0.00199308	-7.46842e-06	-897.569	478.507		0.430013	0	6027	0.013315	-0.00038364	-981.91	993.144		0.430013	0	6027	0.0141935	-0.000189235
0.323339	0	6036	0.0682635	0.00148007	297.971	-1448.93						0.323339	0	6036	0.0597974	-0.0103765	-15609.2	-49719		0.323339	0	6036	0.00191435	0.00867076	-5417.83	17849.2			0.323339	0	6036	0.00245009	0.00423879	5625.22	-2274.1		0.323339	0	6036	0.00330847	-0.00243125	4749.11	-3102.52		0.323339	0	6036	0.0129553	-0.0105586
0.377511	0	6039	0.101173	0.000834192	-1630.58	-5276.41						0.377511	0	6039	0.209553	-1.28021	-44675.4	36334.4		0.377511	0	6039	0.00134697	-0.000139637	-193.599	-147.338			0.377511	0	6039	0.00294815	-0.000184757	249.04	736.784		0.377511	0	6039	0.00647816	-0.00395456	84.0725	5324.23		0.377511	0	6039	0.0261429	-0.00162689
0.34865	0	6044	0.0239342	-0.00193622	115.183	1870.54						0.34865	0	6044	0.0440013	0.0131166	41.5443	-3469.42		0.34865	0	6044	0.000496386	-1.43969e-05	39.1195	3.15737			0.34865	0	6044	0.00209796	-0.000108053	135.617	79.367		0.34865	0	6044	0.000666443	-0.00011412	448.653	233.221		0.34865	0	6044	0.00147073	5.31894e-05
0.483452	0	6046	0.0380944	0.000191036	-754.202	5896.41						0.483452	0	6046	0.0313247	-0.00479942	-26921.7	-42560.4		0.483452	0	6046	0.000836495	5.61063e-06	-220.573	-0.199122			0.483452	0	6046	0.00175704	0.000257115	517.065	324.344		0.483452	0	6046	0.00459278	0.000722572	-279.628	476.359		0.483452	0	6046	0.0040643	-0.000216149
0.495035	0	6061	0.00516698	-0.000354625	91.871	-475.211						0.495035	0	6061	0.00124468	0.00118568	-367.594	-2904.77		0.495035	0	6061	0.000999835	4.42584e-06	89.5607	122.291			0.495035	0	6061	0.000731908	2.06901e-05	-339.57	-471.524		0.495035	0	6061	0.00627985	-0.000149291	566.536	438.142		0.495035	0	6061	0.00292208	-0.000603133
0.453531	0	6068	0.0994385	-0.00117571	-115.487	600.283						0.453531	0	6068	0.088467	0.0418026	7869.26	-104313		0.453531	0	6068	0.000727226	-7.96414e-05	109.877	-102.29			0.453531	0	6068	0.00327672	0.000140941	-588.697	-1041.41		0.453531	0	6068	0.00274471	0.000234442	-596.929	-923.752		0.453531	0	6068	0.00491755	0.00047789
0.325277	0	6069	0.0404362	0.00178406	-795.588	-1561.98						0.325277	0	6069	4.02309	0.2309	0	-6032.5		0.325277	0	6069	0.00436073	-0.000219034	357.548	-96.1584			0.325277	0	6069	0.00768269	-0.000209214	186.577	-161.68		0.325277	0	6069	0.0134332	-0.00375894	-873.14	5305.71		0.325277	0	6069	0.035117	0.0148892
0.457253	0	6079	0.00064633	-0.000642384	211.576	697.456						0.457253	0	6079	0.00113247	0.000915386	798.057	-351.254		0.457253	0	6079	6.31266e-05	3.0667e-05	5.63839	3.55627			0.457253	0	6079	0.000158159	-2.40547e-06	-67.059	-20.1332		0.457253	0	6079	0.000469148	-0.000317895	-186.904	-166.125		0.457253	0	6079	0.000521427	-0.000299288
0.369966	0	6092	0.00575087	-0.000315971	190.921	1591.29						0.369966	0	6092	0.00813044	0.00114268	-10085.6	14763.4		0.369966	0	6092	0.000393506	-0.000114386	49.4603	-14.6373			0.369966	0	6092	0.000233745	0.000128568	7.63901	-28.6744		0.369966	0	6092	0.00129459	-0.000149282	410.447	24.7429		0.369966	0	6092	0.00118188	0.00047572
0.423857	0	6095	0.0801469	-0.000572982	-1640.28	-2612.62						0.423857	0	6095	0.601348	3.14129	4661.35	90145.5		0.423857	0	6095	0.000573808	-6.74491e-05	625.452	-87.4983			0.423857	0	6095	0.00503493	0.000811392	-238.876	-624.678		0.423857	0	6095	0.00773199	0.000221096	-2569.15	-1919.05		0.423857	0	6095	0.00470668	0.00256772
0.402301	0	6112	0.0707989	-0.00339457	2180.24	5463.44						0.402301	0	6112	1.59697	-0.0598672	0	-9227.67		0.402301	0	6112	0.00172031	0.000250122	491.347	-149.808			0.402301	0	6112	0.0089301	-0.000177249	-2520.38	1648.08		0.402301	0	6112	0.00698375	-0.000722908	2112.27	-407.742		0.402301	0	6112	0.0118186	0.00240111
0.407265	0	6116	0.033912	-0.00231242	-656.354	4132.14						0.407265	0	6116	0.0276763	0.0103899	19409.9	-8276.19		0.407265	0	6116	0.000748072	-5.56898e-05	-121.687	53.6082			0.407265	0	6116	0.00132667	6.03595e-05	281.839	234.666		0.407265	0	6116	0.00464875	0.000571644	-347.164	146.031		0.407265	0	6116	0.00301165	-0.000230046
0.484654	0	6124	0.0436492	-0.00052181	586.619	-524.669						0.484654	0	6124	0.0692847	-0.021577	-23640.9	15321.4		0.484654	0	6124	0.000879029	-1.14648e-05	399.894	91.5863			0.484654	0	6124	0.00650277	-1.33083e-05	10.819	69.9395		0.484654	0	6124	0.0169157	-0.000404425	3108.24	792.794		0.484654	0	6124	0.012395	-0.000585879
0.411809	0	6125	0.122425	-0.00274094	4771	1606.98						0.411809	0	6125	1.44754	1.71642	628824	978377		0.411809	0	6125	0.00272745	0.000199098	376.736	-128.757			0.411809	0	6125	0.00645293	0.00106786	357.566	-1365.56		0.411809	0	6125	0.00379352	-0.00256692	645.754	-3028.39		0.411809	0	6125	0.00286761	0.001155
0.431794	0	6128	0.0477109	0.00130724	-2492.95	7989.67						0.431794	0	6128	1.2447	2.53918	132426	-201184		0.431794	0	6128	0.000556577	-8.88503e-05	-117.603	44.1138			0.431794	0	6128	0.00551811	-0.000145009	605.92	-93.2983		0.431794	0	6128	0.00530321	-0.000210139	1827.79	266.592		0.431794	0	6128	0.0154454	-3.549e-05
0.36644	0	6129	0.110377	0.028799	-603.481	-6543.41						0.36644	0	6129	0.0648253	0.0110771	-38247.5	-1665.65		0.36644	0	6129	0.00239464	-0.000177855	123.023	-52.14			0.36644	0	6129	0.00294665	7.5805e-05	-172.264	-493.132		0.36644	0	6129	0.00401926	0.000699268	61.6258	-779.766		0.36644	0	6129	0.0052503	-0.00435309
0.428681	0	6135	0.0151123	0.0003926	401.005	7338.35						0.428681	0	6135	0.0395604	-0.0108636	-9864.21	-16239.8		0.428681	0	6135	0.000805121	3.97714e-05	44.4352	-51.9213			0.428681	0	6135	0.00062732	0.000229401	373.397	-495.205		0.428681	0	6135	0.00710132	-0.00042114	1285.24	747.287		0.428681	0	6135	0.00283289	0.00012212
0.412432	0	6136	0.0933789	-0.000489413	91.7115	3302.97						0.412432	0	6136	0.62809	-0.462041	-10226	-53908.3		0.412432	0	6136	0.00113659	7.12361e-05	-166.156	-150.036			0.412432	0	6136	0.00683778	-0.000542442	166.441	1120.3		0.412432	0	6136	0.00575148	0.000991366	-434.694	-1836.85		0.412432	0	6136	0.0135125	0.000594171
0.442375	0	6149	0.112742	-0.000656144	2897.24	-1879.15						0.442375	0	6149	1.31295	2.17454	-111656	-32937.4		0.442375	0	6149	0.003264	-1.73126e-05	173.622	-388.557			0.442375	0	6149	0.0112591	0.00121889	973.934	-5.27276		0.442375	0	6149	0.0161948	0.000594179	1575.53	127.237		0.442375	0	6149	0.00922433	0.00274581
0.343065	0	6150	0.100863	0.00151467	-436.283	-987.804						0.343065	0	6150	0.935543	0.106345	0	-6710.32		0.343065	0	6150	0.00295839	0.000244677	-93.2661	-109.719			0.343065	0	6150	0.0112389	0.000540481	-69.9044	-77.5952		0.343065	0	6150	0.0162394	0.000213081	-94.4928	-171.749		0.343065	0	6150	0.0131247	-0.000493988
0.490891	0	6153	0.0397558	-0.00403129	674.832	-172.156						0.490891	0	6153	0.0188213	-0.0319334	-13194.4	54847.3		0.490891	0	6153	0.000646297	-1.14163e-05	145.114	-424.404			0.490891	0	6153	0.00328378	8.57425e-05	-206.731	1649.35		0.490891	0	6153	0.00537007	-0.000439742	418.584	-888.887		0.490891	0	6153	0.0118138	-0.00220924
0.436219	0	6155	0.0121832	0.000176092	1895.3	-3096.44						0.436219	0	6155	0.0186363	-0.000327702	-5368.82	-1263.22		0.436219	0	6155	0.000323575	-3.24796e-05	-81.0216	49.3974			0.436219	0	6155	0.00140457	0.000195665	46.181	-29.2591		0.436219	0	6155	0.00379877	0.000320138	-332.783	256.842		0.436219	0	6155	0.00166181	-4.2005e-05
0.45951	0	6160	0.0559005	-0.00162594	170.627	-1732.61						0.45951	0	6160	0.0921547	0.0442421	-27372.7	-20576.6		0.45951	0	6160	0.000676777	0.000131026	219.509	-505.927			0.45951	0	6160	0.00449211	0.000257537	275.967	-73.1299		0.45951	0	6160	0.00677353	-0.000655178	-1822.37	506.258		0.45951	0	6160	0.00300141	-0.000923089
0.346204	0	6161	0.0485609	0.00515304	-26.8044	-4653.1						0.346204	0	6161	0.312034	0.328929	0	-6833.66		0.346204	0	6161	0.00159665	0.000918507	-233.386	415.119			0.346204	0	6161	0.00610301	-0.0004265	182.696	890.437		0.346204	0	6161	0.0159498	-0.000993717	-1566.52	216.892		0.346204	0	6161	0.0110718	-0.0060357
0.373293	0	6164	0.000252697	0.000465608	111.808	476.277						0.373293	0	6164	0.000459844	-0.000152896	-3815.35	-2687.64		0.373293	0	6164	9.04803e-05	2.2144e-05	-1.56338	4.64445			0.373293	0	6164	0.000229548	-2.05181e-05	-22.5223	14.7864		0.373293	0	6164	0.000484822	-0.000141297	-130.222	-124.569		0.373293	0	6164	0.000498031	-0.000199634
0.438253	0	6168	0.0331751	-0.00110684	-470.84	-2424.37						0.438253	0	6168	0.012854	0.00116963	-3114.08	-3883.11		0.438253	0	6168	0.000583809	-0.000113058	95.6602	-78.5746			0.438253	0	6168	0.00459938	-0.00021728	65.88	275.92		0.438253	0	6168	0.00780963	6.90309e-05	-661.264	527.454		0.438253	0	6168	0.00229849	-0.000668642
0.433791	0	6170	0.0392008	-0.000562949	946.205	-120.466						0.433791	0	6170	0.102205	0.03266	-7691.09	1792.7		0.433791	0	6170	0.000813875	1.97989e-05	212.918	30.4025			0.433791	0	6170	0.00498347	-0.000184317	461.82	170.658		0.433791	0	6170	0.0138637	0.00033654	1471.56	-443.496		0.433791	0	6170	0.00932534	-0.000573992
0.45944	0	6183	0.0267035	0.000576237	585.43	-1271.42						0.45944	0	6183	0.0360684	-0.00654372	5875.37	-6451.68		0.45944	0	6183	0.000832033	2.93597e-05	114.056	-66.924			0.45944	0	6183	0.00072489	-0.000114341	-209.438	148.741		0.45944	0	6183	0.000212572	-0.000482132	-826.112	350.428		0.45944	0	6183	0.00556642	-8.64051e-05
0.492984	0	6185	0.0332462	-0.000247638	-656.952	-4303.78						0.492984	0	6185	2.93951	-0.693145	335670	551767		0.492984	0	6185	0.00406323	0.000222744	-68.5102	-572.978			0.492984	0	6185	0.017039	-0.00265215	7408.3	174.029		0.492984	0	6185	0.0865617	0.0262027	89018.7	-49808		0.492984	0	6185	0.182033	-0.230109
0.490809	0	6189	0.00794461	-0.000822325	1754.05	2816.41						0.490809	0	6189	0.0342922	-0.0024867	1897.48	2862.81		0.490809	0	6189	9.61385e-05	1.23469e-05	44.5408	-42.467			0.490809	0	6189	0.00111952	-0.000142037	23.2359	-219.826		0.490809	0	6189	0.00341658	0.000573354	494.457	-163.332		0.490809	0	6189	0.000400134	2.83126e-06
0.481728	0	6192	0.0338539	0.00785193	-820.307	528.138						0.481728	0	6192	2.99159	-0.285915	0	-13231.1		0.481728	0	6192	0.33838	-0.531646	7615.91	28171.2			0.481728	0	6192	2.76358	3.28024	0	-13231.1		0.481728	0	6192	2.07561	0.460603	0	-13231.1		0.481728	0	6192	2.34747	0.864008
0.351586	0	6194	0.036473	-0.00145004	-69.8097	-229.385						0.351586	0	6194	0.0393191	0.0708798	31520	-4923.19		0.351586	0	6194	0.0021774	-0.00021897	119.965	84.7578			0.351586	0	6194	0.00306737	6.1034e-06	15.1648	-299.056		0.351586	0	6194	0.00819294	0.00146598	-453.304	1961.66		0.351586	0	6194	0.00915867	0.000364221
0.455996	0	6205	0.0515055	-0.00221886	-1254.59	-357.368						0.455996	0	6205	0.0535663	-0.000625652	-11042.4	51015.2		0.455996	0	6205	0.000540007	-3.32911e-05	-359.802	74.4768			0.455996	0	6205	0.00190634	-0.000101371	-985.752	519.205		0.455996	0	6205	0.013412	-0.000511592	-487.106	1078.27		0.455996	0	6205	0.0104803	0.00022309
0.416652	0	6212	0.0193068	0.0179528	621.088	-2461.75						0.416652	0	6212	0.0105402	-0.00825725	-11856.1	8090.86		0.416652	0	6212	4.27462e-05	-5.23298e-05	-15.1764	-2.70366			0.416652	0	6212	9.22737e-05	4.7586e-05	-12.8709	13.0007		0.416652	0	6212	0.000323664	0.000205572	239.053	3.05699		0.416652	0	6212	0.0047642	0.00252669
0.335804	0	6217	0.0832313	0.000320444	174.739	-3368.52						0.335804	0	6217	1.30375	-2.10336	0	-6429.28		0.335804	0	6217	0.00371038	-0.0103289	1155.01	2312.58			0.335804	0	6217	0.00646163	0.000222243	3989.28	3617.2		0.335804	0	6217	0.0101793	0.00626225	-2327.52	66.4352		0.335804	0	6217	0.0256074	-0.00159087
0.493691	0	6221	0.0431103	-0.000673728	1268.57	-641.177						0.493691	0	6221	0.101487	-0.0129059	6262.85	-46793.2		0.493691	0	6221	0.0020116	2.70218e-05	-188.423	-191.252			0.493691	0	6221	0.00285208	-0.000174823	433.855	903.255		0.493691	0	6221	0.0105889	-0.00105039	2952.31	192.413		0.493691	0	6221	0.00730989	-0.000649795
0.425439	0	6224	0.0818395	0.00064379	-5809.57	5264.95						0.425439	0	6224	2.36678	-0.43743	-119920	189837		0.425439	0	6224	0.000628726	0.000135768	-398.31	-336.501			0.425439	0	6224	0.00306986	0.000335609	-693.746	-389.2		0.425439	0	6224	0.0142716	-0.000233555	1222.28	-506.743		0.425439	0	6224	0.00262975	-0.00137754
0.410071	0	6232	0.0131543	0.0101113	-923.543	1448.25						0.410071	0	6232	0.0137316	-0.00254888	-6035.91	4526.96		0.410071	0	6232	0.00023704	5.62152e-05	48.2307	9.54619			0.410071	0	6232	0.00100527	-2.35263e-05	243.155	26.3713		0.410071	0	6232	0.00129293	-1.2173e-06	-13.1833	123.182		0.410071	0	6232	0.00219997	0.000292813
0.410396	0	6239	0.0232277	0.00205514	-810.416	11551.9						0.410396	0	6239	0.0269433	0.0109292	-2238.16	18466.2		0.410396	0	6239	0.00200372	0.000223332	-238.362	-325.215			0.410396	0	6239	0.00311891	0.000157369	236.081	-101.941		0.410396	0	6239	0.0107994	-0.00289689	909.829	930.786		0.410396	0	6239	0.00180373	0.000986462
0.401266	0	6245	0.0281072	-0.00303163	2469.69	-194.098						0.401266	0	6245	0.0189242	-0.0260622	-17296.1	-36655.5		0.401266	0	6245	0.000359799	-1.09495e-05	-44.4809	-83.2477			0.401266	0	6245	0.00108591	0.000278853	73.417	36.5541		0.401266	0	6245	0.000908788	-0.000412541	536.373	-62.5007		0.401266	0	6245	0.0147154	-0.00128084
0.443971	0	6249	0.097342	0.000725984	1339.44	-2082.04						0.443971	0	6249	0.274555	0.600961	-36298.5	-212165		0.443971	0	6249	0.000937389	0.000171832	87.9852	-150.342			0.443971	0	6249	0.0045898	0.000369143	567.457	-174.088		0.443971	0	6249	0.0179884	-1.37133e-05	322.858	-3151.42		0.443971	0	6249	0.00912895	-0.00109138
0.343059	0	6257	0.0944362	0.00012534	-413.146	2575.64						0.343059	0	6257	1.24133	0.774254	-14299.2	50763.6		0.343059	0	6257	0.00110905	0.00015202	-109.455	-107.163			0.343059	0	6257	0.00709004	-0.000700572	138.621	649.895		0.343059	0	6257	0.00555293	0.000893515	-1129.44	-1521.02		0.343059	0	6257	0.0134635	0.000450083
0.407296	0	6262	0.0141687	0.00140189	-1129.15	5181.86						0.407296	0	6262	0.0106446	-0.00176061	26816	-21627.4		0.407296	0	6262	0.00130575	5.83518e-05	35.8143	-48.732			0.407296	0	6262	0.00187941	7.51251e-05	-351.732	55.7131		0.407296	0	6262	0.00342279	5.38316e-05	574.756	392.954		0.407296	0	6262	0.00336146	-0.000301231
0.488353	0	6267	0.0818448	0.000514676	-257.512	-12827.4						0.488353	0	6267	1.08478	-0.25109	367771	-189019		0.488353	0	6267	0.00340376	7.3472e-05	304.321	-251.116			0.488353	0	6267	0.00739466	-3.65479e-05	321.495	-223.564		0.488353	0	6267	0.0125904	-0.00120887	1805.53	-14881.2		0.488353	0	6267	0.0301064	0.00799179
0.412365	0	6272	0.0116084	-5.33932e-05	1475.67	-4077.75						0.412365	0	6272	0.0163573	-0.00209964	-5056.51	929.32		0.412365	0	6272	0.000448373	-5.68784e-06	12.4341	67.882			0.412365	0	6272	0.00191189	0.00020956	143.144	71.78		0.412365	0	6272	0.00525303	0.000427878	-439.008	47.8335		0.412365	0	6272	0.0019395	0.000168808
0.355387	0	6274	0.0353042	-0.000961846	1852.82	4026.78						0.355387	0	6274	0.0206417	0.00349868	-24722	-4739.53		0.355387	0	6274	0.000251155	2.56831e-05	40.1436	23.9626			0.355387	0	6274	0.00239437	-0.00021135	69.1668	87.6069		0.355387	0	6274	0.00482361	0.00022792	530.246	-884.577		0.355387	0	6274	0.00866612	-0.000368006
0.405558	0	6282	0.0798914	-0.00129629	-1850.91	747.335						0.405558	0	6282	0.199112	-0.521263	-97624.1	26699.1		0.405558	0	6282	0.00078381	-5.06328e-06	-479.281	120.221			0.405558	0	6282	0.00730682	-0.00028574	1100.77	-17.2665		0.405558	0	6282	0.0132405	0.000141723	2165.75	-863.729		0.405558	0	6282	0.0196673	-0.000159611
0.325917	0	6283	0.0224903	-0.051466	-493.318	-30.4676						0.325917	0	6283	0.0156266	0.0304379	47275.3	-19306.2		0.325917	0	6283	0.000564437	0.00197479	-353.556	295.523			0.325917	0	6283	0.000507205	-0.000956331	-141.148	-1731.97		0.325917	0	6283	0.0080392	0.00159202	37.2979	-499.089		0.325917	0	6283	0.00243147	0.000635657
0.356398	0	6284	0.0266349	0.000506087	2169.32	4039.92						0.356398	0	6284	0.0506633	-0.000181483	-13177.2	15874.3		0.356398	0	6284	0.000170432	-3.61353e-06	68.8882	-6.86967			0.356398	0	6284	0.00174843	-0.000280194	125.293	63.6052		0.356398	0	6284	0.004892	0.000353491	312.434	-742.885		0.356398	0	6284	0.0030881	-0.000688889
0.427629	0	6288	0.0112735	-0.00106222	689.639	-284.645						0.427629	0	6288	0.0487749	0.0046796	-38460.8	8614.18		0.427629	0	6288	0.000397683	-2.63966e-05	-25.692	46.7861			0.427629	0	6288	0.00015321	8.80907e-06	-31.605	150.486		0.427629	0	6288	0.00174854	0.000203444	-801.243	190.08		0.427629	0	6288	0.00397638	0.000869321
0.374392	0	6292	0.0319926	0.00108219	1142.51	5529.29						0.374392	0	6292	0.0531709	0.0212146	-10178.9	27555.3		0.374392	0	6292	0.000160366	-3.94744e-06	97.2371	-9.24232			0.374392	0	6292	0.00268141	-0.000241152	439.804	-98.1155		0.374392	0	6292	0.00438801	0.000280965	119.049	-566.331		0.374392	0	6292	0.00741699	-0.00069697
0.387708	0	6296	0.082694	0.000794015	-3768.04	4212.62						0.387708	0	6296	0.530773	-4.79773	-84414.1	-245787		0.387708	0	6296	0.000635496	0.000115761	-281.607	-256.654			0.387708	0	6296	0.00325317	0.000184806	-533.819	-308.295		0.387708	0	6296	0.0127886	-0.000636272	717.041	-146.708		0.387708	0	6296	0.00168963	0.000246747
0.346941	0	6314	0.0657159	-0.0058661	-917.439	-1589.69						0.346941	0	6314	0.0344401	0.0593121	8498	28465.6		0.346941	0	6314	0.00191726	-0.00131861	-748.222	-552.307			0.346941	0	6314	0.00213469	-0.00257013	-243.639	434.721		0.346941	0	6314	0.0123908	-0.00163929	-135.604	517.641		0.346941	0	6314	0.017441	-0.00125215
0.369117	0	6316	0.0784119	0.00167679	-692.802	-7140.33						0.369117	0	6316	0.757792	0.288882	-42071.1	125173		0.369117	0	6316	0.00307843	0.00073309	698.937	-207.297			0.369117	0	6316	0.0076318	0.00123343	386.61	3.04225		0.369117	0	6316	0.0196977	3.28233e-05	14828.8	12131.6		0.369117	0	6316	0.0260488	0.00257318
0.490139	0	6317	0.129821	0.00152872	-344.007	-10766.3						0.490139	0	6317	0.684691	0.3366	0	-13697.1		0.490139	0	6317	0.0020419	-0.000465774	380.119	691.9			0.490139	0	6317	0.00490832	-0.00126245	-17.475	1907.09		0.490139	0	6317	0.0149937	-0.0246965	1164.55	2644.02		0.490139	0	6317	0.0022524	0.0052813
0.30992	0	6320	0.0434308	0.00080983	1009.23	3683.45						0.30992	0	6320	0.00742017	0.00537866	346.357	10225.4		0.30992	0	6320	0.000131138	8.38782e-06	33.6586	19.2606			0.30992	0	6320	0.00314427	-0.00024061	48.379	50.5948		0.30992	0	6320	0.00446338	0.000327175	153.523	-547.015		0.30992	0	6320	0.0118525	-0.000178204
0.423602	0	6325	0.0608667	-0.00147334	132.763	451.683						0.423602	0	6325	0.0404768	-0.00592536	1388.22	13010.8		0.423602	0	6325	0.000805717	5.90501e-05	-55.1172	11.434			0.423602	0	6325	0.00181726	0.000262933	-105.955	-769.83		0.423602	0	6325	0.0031535	9.78854e-05	-1140.85	-1375.33		0.423602	0	6325	0.00511486	-0.000425662
0.496635	0	6326	0.0428873	0.00091092	473.182	-1740.67						0.496635	0	6326	0.0629914	-0.0111411	9105.85	-1593.92		0.496635	0	6326	0.000540961	2.55938e-05	66.0097	-413.979			0.496635	0	6326	0.00144971	-9.61982e-07	-14.27	561.575		0.496635	0	6326	0.00170642	0.000275406	887.781	-272.321		0.496635	0	6326	0.00122831	-0.00130149
0.411027	0	6332	0.0174163	0.00035698	-168.699	171.745						0.411027	0	6332	0.031519	-0.0060074	16626.8	18358.3		0.411027	0	6332	0.000808458	-1.27147e-05	79.0949	-115.219			0.411027	0	6332	0.00149974	0.000117272	-259.794	-169.484		0.411027	0	6332	0.00180492	-0.000156315	-360.652	-1091.23		0.411027	0	6332	0.00242375	0.000144526
0.416199	0	6337	0.076198	-0.0022421	2130.88	5179.76						0.416199	0	6337	2.72482	0.834433	-37388.9	-36999.6		0.416199	0	6337	0.00161527	-6.00054e-05	524.752	-310.797			0.416199	0	6337	0.00858084	-0.000268681	-2247.35	1474.62		0.416199	0	6337	0.00648469	-0.000815895	1447.89	2088.75		0.416199	0	6337	0.00722293	-0.00426738
0.421862	0	6342	0.0787989	0.00690027	-980.668	-8950.84						0.421862	0	6342	0.45867	-0.151944	74486.2	42283.9		0.421862	0	6342	0.00299963	0.000284869	161.969	-219.393			0.421862	0	6342	0.00719491	0.000458718	-91.0624	-1134.07		0.421862	0	6342	0.0153331	0.00250145	-1338	3077.05		0.421862	0	6342	0.0278465	0.00508041
0.412556	0	6349	0.0231951	-7.91668e-05	329.134	322.748						0.412556	0	6349	0.011887	-0.0301904	20317.6	-32332		0.412556	0	6349	0.000272529	-4.84472e-05	-60.7243	-215.907			0.412556	0	6349	0.000964463	-0.000108315	-94.9536	153.647		0.412556	0	6349	0.00680406	0.000837839	1357.91	-312.874		0.412556	0	6349	0.00755279	0.00133254
0.443314	0	6354	0.105696	0.00153863	-1124.71	-10080.2						0.443314	0	6354	1.29333	-0.0251073	-15079.1	23480.7		0.443314	0	6354	0.00411998	0.000443366	-141.72	-323.919			0.443314	0	6354	0.00723328	-0.00138368	1706.44	1018.15		0.443314	0	6354	0.00968097	-0.00213914	7672.6	-2509.89		0.443314	0	6354	0.0318569	-0.00234119
0.411003	0	6364	0.0857785	0.00676294	-840.875	-8839.83						0.411003	0	6364	0.452471	0.719045	15289.5	8857.86		0.411003	0	6364	0.00361125	-2.72797e-05	48.1008	-183.147			0.411003	0	6364	0.00382025	0.000151573	173.725	-234.967		0.411003	0	6364	0.00223437	0.00217742	974.47	172.288		0.411003	0	6364	0.0169746	0.00134859
0.427835	0	6378	0.0406429	0.00110524	921.594	-1758.69						0.427835	0	6378	0.0446315	0.00111167	13432.4	-4473.1		0.427835	0	6378	0.00103848	2.20347e-05	129.68	-92.1981			0.427835	0	6378	0.00115071	-3.62613e-06	-74.3915	175.194		0.427835	0	6378	0.00122125	-0.000227976	-356.309	-2325.97		0.427835	0	6378	0.00710348	0.000721365
0.405536	0	6384	0.0501458	-0.00104972	1259.74	-561.851						0.405536	0	6384	0.0865452	-0.0591504	205025	-50745.4		0.405536	0	6384	0.0022803	7.64969e-05	-119.872	-92.4556			0.405536	0	6384	0.0037006	-0.000357534	31.4173	738.626		0.405536	0	6384	0.00976704	1.37761e-05	1695.61	-168.474		0.405536	0	6384	0.0070313	-0.000646097
0.335192	0	6388	0.0260787	-0.00208952	777.624	431.03						0.335192	0	6388	3.71093	3.54562	337813	143483		0.335192	0	6388	0.00533088	0.0131855	5418.48	561.055			0.335192	0	6388	0.0969939	0.035508	-15592.3	-19345.3		0.335192	0	6388	1.95976	-7.2427	0	-6405.86		0.335192	0	6388	2.5596	-5.03696
0.489962	0	6414	0.00570194	-0.000186683	-1308.93	1918.02						0.489962	0	6414	0.0150824	-0.0118264	29263.1	-20255.2		0.489962	0	6414	0.000332759	2.3813e-05	-81.7815	34.2796			0.489962	0	6414	0.000252502	-4.15038e-06	-31.7989	173.22		0.489962	0	6414	0.00132385	0.000113323	-381.635	59.2457		0.489962	0	6414	0.000359655	-3.78792e-05
0.303994	0	6417	0.0230876	-0.00023468	389.663	-262.716						0.303994	0	6417	0.0390134	0.0140033	-29045.3	-35144.1		0.303994	0	6417	0.000382443	6.55843e-06	-11.0193	-52.7154			0.303994	0	6417	0.00204413	-4.42326e-05	68.9793	-131.81		0.303994	0	6417	0.0042466	0.000642595	719.47	-474.512		0.303994	0	6417	0.00394202	0.000179048
0.383224	0	6419	0.00766446	0.00273904	1369.71	122.622						0.383224	0	6419	0.0104979	-0.00206885	-1629.77	-350.862		0.383224	0	6419	3.36501e-05	-2.9014e-05	-55.2322	-15.4562			0.383224	0	6419	0.000637914	0.000165659	24.3203	-29.9626		0.383224	0	6419	0.00202395	0.000397283	-103.735	115.911		0.383224	0	6419	0.000793534	-0.000196203
0.479464	0	6425	0.0179525	0.000626589	1278.22	-1051.15						0.479464	0	6425	1.72251	-0.960652	248849	-369658		0.479464	0	6425	0.00283678	-0.000368726	252.084	1022.87			0.479464	0	6425	0.0988022	-0.0514066	-14738.5	53994.3		0.479464	0	6425	0.045976	0.0119714	14056.6	-43221.2		0.479464	0	6425	0.150445	0.0519921
0.464495	0	6428	0.00117196	-0.000901848	-466.68	132.584						0.464495	0	6428	0.000290667	-9.42667e-05	310.967	-105.697		0.464495	0	6428	9.73471e-05	-2.41478e-05	9.09309	23.0114			0.464495	0	6428	0.000123303	9.70909e-05	-53.8638	-35.3753		0.464495	0	6428	0.000266336	-0.000164088	-98.6056	-9.80567		0.464495	0	6428	4.5387e-05	3.19138e-05
0.334247	0	6431	0.0528541	0.00155507	-507.297	4213.04						0.334247	0	6431	0.0387958	0.0307616	-4424.67	39342.2		0.334247	0	6431	0.000206837	9.32669e-05	-21.5356	-77.0183			0.334247	0	6431	0.00646725	5.41369e-05	-219.477	143.099		0.334247	0	6431	0.00208777	-0.00015195	-293.489	-101.713		0.334247	0	6431	0.00877032	0.000589799
0.312205	0	6452	0.0149946	-0.000641591	-277.09	-933.289						0.312205	0	6452	5.18609	3.25967	-57265.8	-160552		0.312205	0	6452	0.00114118	0.000227807	108.179	-392.489			0.312205	0	6452	0.0102677	-0.000280507	-987.228	1164.06		0.312205	0	6452	0.0177922	-0.00137575	11689.9	-13221.2		0.312205	0	6452	0.00784105	-0.00232429
0.390418	0	6457	0.020013	0.00597171	695.341	-354.924						0.390418	0	6457	0.0045492	0.0130004	-21017.5	-7083.45		0.390418	0	6457	0.000405468	-8.90013e-06	4.67831	64.6684			0.390418	0	6457	0.0015465	0.000633027	-280.068	-84.3554		0.390418	0	6457	0.00630388	0.00130616	1124.8	-1082.76		0.390418	0	6457	0.00343587	0.000824637
0.400425	0	6458	0.0603044	0.010916	-540.57	-7792.38						0.400425	0	6458	0.795997	-1.6558	379132	116763		0.400425	0	6458	0.00398858	-0.00019543	-267.231	-245.346			0.400425	0	6458	0.000181665	-0.000379382	663.259	238.083		0.400425	0	6458	0.0102869	0.000554833	2143.81	1224.52		0.400425	0	6458	0.0162045	-0.00327127
0.491286	0	6461	0.0647358	-0.00223409	-1491.23	-268.266						0.491286	0	6461	0.123044	0.249887	-106169	-21718.8		0.491286	0	6461	0.00118531	6.52058e-05	131.817	-173.501			0.491286	0	6461	0.00964025	0.000552522	-578.687	-765.482		0.491286	0	6461	0.019586	-0.0010307	-646.686	-105.598		0.491286	0	6461	0.00905086	0.00020217
0.406955	0	6476	0.083126	-0.00195025	1386.31	3487.05						0.406955	0	6476	0.77535	0.0709291	0	-9442.43		0.406955	0	6476	0.00021696	-0.000145008	462.504	11.9643			0.406955	0	6476	0.00639676	-0.0010494	-498.658	1206.76		0.406955	0	6476	0.00208028	0.00262724	-835.613	-778.208		0.406955	0	6476	0.0035537	0.000359482
0.341509	0	6485	0.0326244	8.72979e-07	1756.25	4120.76						0.341509	0	6485	0.0264798	-0.0194541	5181.73	34194.5		0.341509	0	6485	0.000165001	1.08613e-05	64.664	4.90784			0.341509	0	6485	0.00212071	-0.000283918	156.073	77.2154		0.341509	0	6485	0.00459918	0.000173758	190.603	-701.222		0.341509	0	6485	0.00664286	-0.000769822
0.34391	0	6489	0.052451	0.00162787	-289.595	4731.36						0.34391	0	6489	0.100003	0.0267432	12162.4	-12193.9		0.34391	0	6489	0.000111637	-3.37518e-05	-28.1655	18.9755			0.34391	0	6489	0.00412523	-9.47935e-05	50.5527	-30.0305		0.34391	0	6489	0.00393694	-0.000252048	827.01	-68.945		0.34391	0	6489	0.0138561	-1.78602e-05
0.32826	0	6501	0.0325766	5.91706e-05	229.325	-432.556						0.32826	0	6501	0.0221822	-0.0454735	-728.741	-45901.2		0.32826	0	6501	0.00102525	0.000716521	1521.51	426.578			0.32826	0	6501	0.00141554	0.000607181	-780.67	-381.181		0.32826	0	6501	0.00211144	0.00119544	-1087.41	-47.1532		0.32826	0	6501	0.00645681	0.000348321
0.312744	0	6510	0.0668679	0.00714176	-1098.24	-4557.36						0.312744	0	6510	0.566297	-0.340122	61768.1	-83315.9		0.312744	0	6510	0.0035221	0.000799054	-95.6473	75.7443			0.312744	0	6510	0.00670424	7.84854e-05	-329.649	-1.56915		0.312744	0	6510	0.0225635	-0.00387244	-921.364	2229.69		0.312744	0	6510	0.00978805	0.0035536
0.378666	0	6512	0.0231282	-0.000479712	-136.512	783.244						0.378666	0	6512	1.89476	1.16425	0	-8175.29		0.378666	0	6512	0.00174882	-0.00208254	888.628	3017.04			0.378666	0	6512	7.11905	2.39726	0	-8175.29		0.378666	0	6512	6.2156	1.9302	0	-8175.29		0.378666	0	6512	4.6128	-1.5904
0.436972	0	6529	0.0105877	-0.00260105	1718.71	-6077.95						0.436972	0	6529	0.029769	-0.00254937	-84.7538	1998.62		0.436972	0	6529	0.00038803	0.00013817	40.2508	-4.17222			0.436972	0	6529	0.00412995	0.000328864	348.695	233.786		0.436972	0	6529	0.00817895	-1.21831e-05	-869.873	-254.916		0.436972	0	6529	0.000157989	0.00044221
0.459056	0	6536	0.0381135	-0.0106972	-3797.51	-4493.7						0.459056	0	6536	0.079185	0.0294991	-35458.1	-42445.8		0.459056	0	6536	0.00124589	4.57614e-05	-138.725	-336.397			0.459056	0	6536	0.0022478	0.00021237	7.15681	-423.537		0.459056	0	6536	0.00440017	-0.000587009	664.886	437.262		0.459056	0	6536	0.00254466	-0.0177951
0.412702	0	6543	0.0489357	-0.0013498	-651.517	-8504.58						0.412702	0	6543	0.0882051	-0.00145941	-46253.2	-42282		0.412702	0	6543	0.000239675	-0.000518044	673.511	-84.6021			0.412702	0	6543	0.00374667	6.19174e-05	10.3431	-48.6793		0.412702	0	6543	0.00874237	-0.000934447	1017.06	-605.532		0.412702	0	6543	0.016008	8.26256e-05
0.406841	0	6563	0.0571911	-0.00041436	-1212.59	-1539.92						0.406841	0	6563	0.0421787	-0.00306625	119482	39234.1		0.406841	0	6563	0.00148717	8.21618e-05	325.355	-28.9137			0.406841	0	6563	0.000465349	-0.000112418	-443.995	585.968		0.406841	0	6563	0.0098335	0.000479	-1112.24	1656.91		0.406841	0	6563	0.0046649	-0.000131277
0.473901	0	6569	0.0758692	-0.00185449	364.762	-1966						0.473901	0	6569	0.0947571	0.0209922	-145517	-41312.5		0.473901	0	6569	0.00119358	-9.66528e-06	-472.142	96.1508			0.473901	0	6569	0.00260562	-0.000298711	-1194.6	636.815		0.473901	0	6569	0.0163079	-0.000483855	-403.738	589.778		0.473901	0	6569	0.00851004	-0.00251485
0.306865	0	6576	0.056909	0.000280003	193.022	-459.071						0.306865	0	6576	0.104731	-0.0362509	-43268.1	-20507.6		0.306865	0	6576	0.00210142	0.00244911	-440.237	7.51783			0.306865	0	6576	0.0032091	0.00121613	459.903	-190.734		0.306865	0	6576	0.0072375	-0.00176669	894.279	-1057.8		0.306865	0	6576	0.00398857	-0.00241536
0.39318	0	6581	0.00162678	-0.00149216	-697.916	-25.9167						0.39318	0	6581	1.09276	1.48915	0	-8814.02		0.39318	0	6581	0.00016069	-0.000125881	-8.73607	-101.075			0.39318	0	6581	0.00271772	0.00354477	1671.73	-1420.5		0.39318	0	6581	0.00925865	-3.87437e-05	6768.44	-20356.9		0.39318	0	6581	0.00362937	0.000955792
0.457436	0	6583	0.00424813	0.000297305	747.98	967.657						0.457436	0	6583	0.0105892	-0.000237555	2218.31	-581.332		0.457436	0	6583	0.000467229	3.98554e-05	574.789	241.671			0.457436	0	6583	0.00250848	1.22453e-05	-586.98	-221.535		0.457436	0	6583	0.00853505	-4.09275e-05	-270.759	578.438		0.457436	0	6583	0.00693359	0.000525707
0.369039	0	6584	0.105644	-0.00128109	-882.945	-671.667						0.369039	0	6584	1.2597	1.57968	127333	74548.5		0.369039	0	6584	0.00321526	-0.00384095	-559.836	-418.265			0.369039	0	6584	0.00802826	0.00170903	-620.401	3876.43		0.369039	0	6584	0.0195659	0.000130424	1424	2835.91		0.369039	0	6584	0.00193129	0.00374409
0.471267	0	6591	0.0221164	0.000857477	-51.9814	10222.9						0.471267	0	6591	0.0288473	-0.00129919	-10723.1	-76980.5		0.471267	0	6591	0.000697952	-1.31488e-06	147.713	-38.6667			0.471267	0	6591	0.00189471	-5.27477e-05	555.225	-505.022		0.471267	0	6591	0.00480882	0.000272485	965.674	-475.63		0.471267	0	6591	0.00762448	-0.00061967
0.352687	0	6599	0.0447641	0.00639818	70.2481	-5346.36						0.352687	0	6599	0.647365	-1.25891	0	-7092.01		0.352687	0	6599	0.00198876	-0.000258495	-238.919	-191.066			0.352687	0	6599	0.00348595	-0.000518103	-85.5622	407.025		0.352687	0	6599	0.0137026	0.000868343	909.686	651.66		0.352687	0	6599	0.00898851	-0.00350904
0.387759	0	6600	0.00445735	0.00244578	95.3028	-3448.8						0.387759	0	6600	3.73585	0.97079	123369	-308305		0.387759	0	6600	0.000199457	5.87714e-05	-679.89	109.699			0.387759	0	6600	0.00808456	-5.92409e-07	1483.26	-981.71		0.387759	0	6600	0.0359979	0.00527765	1794.56	5265.12		0.387759	0	6600	0.0210402	-0.00235219
0.420012	0	6624	0.00530775	-4.37158e-05	713.537	1095.97						0.420012	0	6624	0.0151018	-0.00104083	-9907.89	-5585.17		0.420012	0	6624	3.12712e-05	-5.3526e-06	16.2554	-15.4442			0.420012	0	6624	0.000504871	-5.63193e-05	-39.9139	-45.8688		0.420012	0	6624	0.00153746	0.000209594	265.527	-158.315		0.420012	0	6624	0.000347215	4.62193e-05
0.489393	0	6625	0.0338237	-0.00116736	-650.482	-745.337						0.489393	0	6625	0.0373221	0.0037389	39188.4	-16603.5		0.489393	0	6625	0.000839893	-5.28602e-05	-189.865	59.8079			0.489393	0	6625	0.00195419	-9.15481e-05	83.1115	337.366		0.489393	0	6625	0.00937981	-0.000408811	557.099	854.637		0.489393	0	6625	0.0225308	-0.000822733
0.366355	0	6640	0.0167185	-0.000448618	-23.288	-320.418						0.366355	0	6640	0.0187075	-0.0228219	-9101.43	-18048.5		0.366355	0	6640	0.000871552	2.03262e-05	-46.0548	-29.8663			0.366355	0	6640	0.000126112	-4.63825e-05	28.4803	-3.88444		0.366355	0	6640	0.00108087	7.11536e-05	334.942	486.451		0.366355	0	6640	0.00387999	0.000619471
0.457201	0	6644	0.121191	-0.000819835	-228.853	-2861.99						0.457201	0	6644	0.981543	-1.3532	-26067.4	125892		0.457201	0	6644	0.00259403	-0.000226261	342.945	234.731			0.457201	0	6644	0.0049393	-0.000159431	765.519	107.591		0.457201	0	6644	0.00690368	0.00293477	-16288.9	-10277.1		0.457201	0	6644	0.00733685	0.000542805
0.337029	0	6648	0.00400412	0.000206651	-140.211	2139.93						0.337029	0	6648	0.0207684	0.000405825	3383.93	-739.889		0.337029	0	6648	0.000267537	-9.67092e-06	49.8053	3.14592			0.337029	0	6648	0.000479144	1.84508e-05	26.3509	70.3629		0.337029	0	6648	0.00204353	0.000288934	-297.632	5.23286		0.337029	0	6648	0.000628797	4.91858e-05
0.416204	0	6656	0.0339106	0.00156194	2459.84	2696.28						0.416204	0	6656	0.0319975	0.00795616	28783.3	-12023.8		0.416204	0	6656	0.000571884	5.48038e-05	-3.55399	29.7594			0.416204	0	6656	0.00274362	-6.87034e-05	-162.733	-10.2741		0.416204	0	6656	0.00440404	-0.000407173	712.434	338.997		0.416204	0	6656	0.0075019	0.000566805
0.412773	0	6660	0.0755271	-0.0026217	-2125.99	-880.738						0.412773	0	6660	0.226255	0.325866	-20872.6	-57200.9		0.412773	0	6660	0.00198567	-3.78314e-05	10.247	212.865			0.412773	0	6660	0.00470142	0.000206203	137.137	-738.418		0.412773	0	6660	0.0049775	-0.000496763	-2765.82	1411.19		0.412773	0	6660	0.00638199	8.13594e-06
0.319596	0	6664	0.091375	0.000504385	380.369	-1239						0.319596	0	6664	0.241061	-0.285024	0	-5823.63		0.319596	0	6664	0.00171133	1.23461e-05	19.881	15.2761			0.319596	0	6664	0.00230874	0.000281729	208.373	-54.7572		0.319596	0	6664	0.0157594	-0.000215825	-127.677	-792.622		0.319596	0	6664	0.00258686	-0.000301045
0.377648	0	6673	0.140494	-0.00377017	-1347.52	-8507.89						0.377648	0	6673	0.916515	-0.989182	0	-8131.38		0.377648	0	6673	0.00075719	-0.000270787	289.838	-254.798			0.377648	0	6673	0.00610848	6.95998e-05	862.73	-216.984		0.377648	0	6673	0.00574266	0.000154104	-2135.69	-903.371		0.377648	0	6673	0.00729562	-0.00314513
0.35986	0	6682	0.0195401	-0.0011485	17.0975	101.767						0.35986	0	6682	0.0525069	-0.000161291	-9188.38	-42609.8		0.35986	0	6682	0.00017677	1.0282e-05	-16.0056	18.9941			0.35986	0	6682	0.00140303	-2.71597e-05	-129.422	-109.919		0.35986	0	6682	0.00441231	-0.000372205	-303.341	-1013.54		0.35986	0	6682	0.0114112	-0.000686708
0.376112	0	6686	0.0227617	0.000105742	13.4952	220.251						0.376112	0	6686	0.028357	0.00240094	-5213.88	-5658.76		0.376112	0	6686	0.000849031	7.79796e-05	63.2887	-128.544			0.376112	0	6686	0.00258202	5.92907e-05	-288.119	-224.515		0.376112	0	6686	0.00250318	0.000159338	-275.876	-1244.15		0.376112	0	6686	0.000623866	0.000272425
0.457231	0	6691	0.121832	-0.00141674	-2974.35	-6427.46						0.457231	0	6691	1.10363	0.178134	272967	-5461.4		0.457231	0	6691	0.00205077	-2.44227e-05	-112.154	-337.368			0.457231	0	6691	0.00118488	-0.000206093	970.782	-67.4191		0.457231	0	6691	0.0191883	-0.000706346	2040.56	-3364.55		0.457231	0	6691	0.00956118	-0.000533695
0.496839	0	6692	0.0813353	0.000831646	-7603.44	7731.12						0.496839	0	6692	1.55818	-0.291742	424014	-130342		0.496839	0	6692	0.000481187	0.000128373	-544.191	-421.107			0.496839	0	6692	0.00347895	0.000447129	-1007.96	-637.784		0.496839	0	6692	0.0136064	-0.000431283	1842.06	-320.72		0.496839	0	6692	0.00308114	-0.000129025
0.462248	0	6693	0.0534136	-0.00193095	-1033.78	-994.09						0.462248	0	6693	0.0934169	-0.0102647	15226.4	15034.8		0.462248	0	6693	0.00124586	-4.50325e-05	-363.694	120.276			0.462248	0	6693	0.00147772	-0.00032336	-914.516	515.223		0.462248	0	6693	0.0129714	-0.000260288	26.7698	944.11		0.462248	0	6693	0.0138214	0.000542575
0.309793	0	6697	0.0426679	-0.000153058	543.628	691.493						0.309793	0	6697	0.0927805	-0.0194251	-46196.1	-1938.77		0.309793	0	6697	0.00126786	0.0104693	-2704.28	1345.9			0.309793	0	6697	0.00307072	1.265e-05	-1114.96	467.542		0.309793	0	6697	0.000856288	0.0150866	-153.013	272.238		0.309793	0	6697	0.00243749	-0.00383429
0.448115	0	6708	0.0170164	0.00304162	-1332.84	-1212.64						0.448115	0	6708	0.0825453	-0.0107067	2878.58	-25771.8		0.448115	0	6708	0.000676773	-8.51276e-05	-1.16779	90.4194			0.448115	0	6708	0.00164203	3.23666e-05	75.7025	228.108		0.448115	0	6708	0.00401988	-0.000176831	341.217	374.404		0.448115	0	6708	0.00876283	0.0012101
0.375686	0	6711	0.0734184	0.00347517	-1.21315	4045.3						0.375686	0	6711	0.00665615	-0.0869331	54544.5	-11280.1		0.375686	0	6711	0.00224717	-4.2265e-05	16.87	-192.608			0.375686	0	6711	0.00481298	-0.000321562	-487.857	-408.865		0.375686	0	6711	0.00465105	0.0014454	-938.335	-17.6378		0.375686	0	6711	0.0129794	-0.0011347
0.355606	0	6720	0.0142632	0.000979073	416.975	-960.697						0.355606	0	6720	1.60829	-2.27772	-180527	-167544		0.355606	0	6720	0.00119205	-0.000162786	51.9529	-75.4778			0.355606	0	6720	0.0020231	-0.000219511	593.372	520.692		0.355606	0	6720	0.0122775	0.000451885	3339.54	-2402.22		0.355606	0	6720	0.0044317	0.00244032
0.383531	0	6721	0.112475	-0.000556796	2075.7	-1296.91						0.383531	0	6721	2.08279	-1.55783	54683.3	4401.26		0.383531	0	6721	0.0031004	0.000173311	102.272	-400.828			0.383531	0	6721	0.0119855	0.00193876	-763.362	-348.087		0.383531	0	6721	0.0180439	0.00248364	469.845	-1505.95		0.383531	0	6721	0.0106721	0.00564037
0.34181	0	6745	0.0624973	0.00795911	90.3637	-5075.47						0.34181	0	6745	0.946592	0.114139	-13595.3	-60113.4		0.34181	0	6745	0.00152639	-0.000105025	-243.423	-123.846			0.34181	0	6745	0.00516685	0.000497948	-268.225	-296.548		0.34181	0	6745	0.0187623	0.00170316	-3900.54	488.792		0.34181	0	6745	0.00444239	0.00133833
0.493715	0	6750	0.010424	-0.00036511	136.2	8699.17						0.493715	0	6750	0.0116454	0.0153614	25609.4	24431.2		0.493715	0	6750	0.00110589	6.34395e-05	-130.138	63.6903			0.493715	0	6750	0.000212416	-2.4117e-05	353.758	673.733		0.493715	0	6750	0.00902201	-6.84564e-05	1214.13	260.729		0.493715	0	6750	0.00307417	1.61134e-05
0.458992	0	6754	0.0688118	-0.000480974	896.431	-1457.42						0.458992	0	6754	0.00986112	-0.0693799	-201797	30654.6		0.458992	0	6754	0.00127104	0.000164464	-94.1165	-60.203			0.458992	0	6754	0.00431706	0.00018742	552.089	-476.918		0.458992	0	6754	0.0106306	0.000732673	-1013.04	-1940.95		0.458992	0	6754	0.0037713	1.40782e-06
0.453086	0	6757	0.0135138	-0.00274255	-777.979	-313.632						0.453086	0	6757	0.0249939	0.0263597	37147.4	-44101.2		0.453086	0	6757	0.000360878	-5.28546e-05	-53.7034	113.28			0.453086	0	6757	0.000427342	0.000106612	202.979	-196.386		0.453086	0	6757	0.00313408	-6.06635e-05	1055.82	-20.0251		0.453086	0	6757	0.000417699	-6.31461e-05
0.365905	0	6760	0.0164288	-0.00218219	689.299	-2309.3						0.365905	0	6760	2.59806	0.0939224	383136	-359887		0.365905	0	6760	0.00711531	0.000832268	-1025.83	453.329			0.365905	0	6760	4.75118	-0.871891	0	-7633.55		0.365905	0	6760	5.32211	-3.05079	0	-7633.55		0.365905	0	6760	2.33053	-5.14604
0.457179	0	6766	0.0671057	0.00567068	415.881	-9447.23						0.457179	0	6766	1.85352	-0.843461	-157399	-236666		0.457179	0	6766	0.00411248	-0.000214959	-499.497	-469.659			0.457179	0	6766	0.000730715	-0.000491174	790.474	328.442		0.457179	0	6766	0.0147901	0.00623015	-5491.6	-477.149		0.457179	0	6766	0.0160518	0.00552575
0.461464	0	6771	0.0306045	0.00368969	-2678.43	-5507.13						0.461464	0	6771	2.8226	0.335654	0	-12141.3		0.461464	0	6771	0.00324419	0.000509124	-1034.94	-934.305			0.461464	0	6771	0.00383866	-0.00203767	-2121.55	1015.86		0.461464	0	6771	0.0197999	-0.00336872	-3160.78	-1195.95		0.461464	0	6771	0.930846	0.566824
0.380106	0	6774	0.0729288	-0.00142703	-1191.45	2182.17						0.380106	0	6774	0.817224	0.472415	-91721.3	88760		0.380106	0	6774	0.00126872	0.000151459	-34.4162	-382.959			0.380106	0	6774	0.00456413	-0.000754523	-399.396	866.604		0.380106	0	6774	0.0105469	0.00135722	-1663.09	-1159.6		0.380106	0	6774	0.0141528	-0.000252865
0.437455	0	6786	0.264209	-0.510688	3484.32	-2588.22						0.437455	0	6786	1.77471	-1.03656	-398251	-25682.6		0.437455	0	6786	0.00148312	-0.000322538	427.313	338.326			0.437455	0	6786	0.00883414	0.000550392	-746.975	-2154.55		0.437455	0	6786	0.004881	-0.00101974	-1535.39	-3361.31		0.437455	0	6786	0.00100522	0.000651223
0.387821	0	6787	0.0477731	-0.00338317	301.523	-4705.73						0.387821	0	6787	0.0312899	0.00493405	11045.6	40089.7		0.387821	0	6787	0.000460585	0.000265877	215.582	-178.293			0.387821	0	6787	0.00197393	0.000296387	201.14	-146.963		0.387821	0	6787	0.00456208	-0.000492569	227.254	-527.552		0.387821	0	6787	0.00966116	-0.00173234
0.341158	0	6791	0.0403449	0.00112235	185.118	4799.75						0.341158	0	6791	0.0645606	0.0215009	-17004.2	-69883.7		0.341158	0	6791	0.000269994	-1.48334e-05	24.3018	15.7185			0.341158	0	6791	0.00367956	-0.000183953	279.402	-128.307		0.341158	0	6791	0.00339857	0.00015874	273.929	-200.847		0.341158	0	6791	0.0126933	-0.00025881
0.300732	0	6796	0.00963854	0.00114609	-245.202	-646.538						0.300732	0	6796	0.0518004	0.011385	2754.49	-21457.1		0.300732	0	6796	0.000555666	-0.000327215	-41.0839	-63.5853			0.300732	0	6796	0.00132668	-0.000346587	-210.602	-139.047		0.300732	0	6796	0.00369596	-0.00109078	357.629	-196.607		0.300732	0	6796	0.00819345	-0.00183246
0.303931	0	6813	0.0988345	-0.00169197	333.766	811.71						0.303931	0	6813	0.973687	0.527738	47191.1	253073		0.303931	0	6813	0.00144829	0.000162118	-283.103	59.0534			0.303931	0	6813	0.00387806	-0.000723961	419.59	-206.937		0.303931	0	6813	0.00855686	-0.00246075	-2133.79	5023.69		0.303931	0	6813	0.0274547	-0.00616357
0.390069	0	6821	0.0278817	0.00251284	-350.263	5187.34						0.390069	0	6821	0.00791656	-0.00253259	9000.95	-9983.02		0.390069	0	6821	0.000630128	0.000278711	52.0254	-162.784			0.390069	0	6821	0.00378937	-0.00019169	-14.992	-491.45		0.390069	0	6821	0.0105372	0.00301502	-141.539	-1563.31		0.390069	0	6821	0.00533746	0.000402696
0.393457	0	6838	0.0485153	-0.000143146	1154.44	-574.575						0.393457	0	6838	0.063362	0.0758238	29771.3	53938.9		0.393457	0	6838	0.00218693	2.39815e-05	-111.515	-74.5432			0.393457	0	6838	0.00339936	-0.000229514	102.765	586.785		0.393457	0	6838	0.00979819	-0.000162903	1885.86	-604.865		0.393457	0	6838	0.00621347	-0.000726274
0.401156	0	6842	0.0987921	-0.000950943	-1543.13	-1457.75						0.401156	0	6842	0.877738	0.454533	-25302	-60320.8		0.401156	0	6842	0.00203936	-2.79941e-05	-66.724	-45.9629			0.401156	0	6842	0.00935021	0.00122173	476.869	-504.794		0.401156	0	6842	0.00469816	0.00134506	-2762.37	-727.682		0.401156	0	6842	0.00203788	-0.00163637
0.384043	0	6844	0.0219419	0.000412706	1866.91	4968.1						0.384043	0	6844	0.0658238	0.0073291	9568.88	4796.55		0.384043	0	6844	0.00015429	6.00112e-07	100.596	-34.6166			0.384043	0	6844	0.0025298	-6.90279e-05	308.918	-256.12		0.384043	0	6844	0.00621858	0.000183634	358.671	-543.567		0.384043	0	6844	0.00213415	-0.000382255
0.383823	0	6846	0.031288	0.000546127	81.9691	-122.096						0.383823	0	6846	0.125613	0.0437718	9267.53	9022.68		0.383823	0	6846	0.000973362	-0.00152979	235.174	101.294			0.383823	0	6846	0.00322974	-0.000608333	124.151	1441.94		0.383823	0	6846	0.00640068	-0.000915762	-1219.58	-1600.37		0.383823	0	6846	0.00397919	-0.00316953
0.320432	0	6847	0.0328473	-0.00262298	-293.871	-6084.24						0.320432	0	6847	0.598473	0.332895	-190224	48603.1		0.320432	0	6847	0.00153769	7.90347e-05	47.9584	188.751			0.320432	0	6847	0.00297492	0.00087954	-100.874	256.14		0.320432	0	6847	0.00933481	8.55055e-05	-307.984	-967.258		0.320432	0	6847	0.00656162	-0.000258315
0.383197	0	6850	0.0263407	0.000970287	773.323	6289.95						0.383197	0	6850	0.0387772	-0.00664114	-21728.5	-1439.98		0.383197	0	6850	0.000357125	-7.63162e-06	110.264	-22.6425			0.383197	0	6850	0.00255487	-9.2054e-05	519.247	-323.726		0.383197	0	6850	0.00515627	0.000258942	386.404	-505.146		0.383197	0	6850	0.00613314	-0.000716985
0.38693	0	6855	0.0323483	0.000318191	67.1894	-1016.96						0.38693	0	6855	0.0623854	0.0292968	-29825.7	5281.32		0.38693	0	6855	0.00107741	0.00118457	118.503	-295.599			0.38693	0	6855	0.000902156	-0.000245439	189.105	485.692		0.38693	0	6855	0.00726031	-0.00103844	-2652.5	3297.13		0.38693	0	6855	0.00306049	-4.72622e-05
0.310337	0	6862	0.00827295	0.000420761	284.26	-853.654						0.310337	0	6862	3.85468	-4.27977	0	-5491.08		0.310337	0	6862	0.00338426	-1.3811e-05	21.0039	-107.857			0.310337	0	6862	0.0537884	0.000845617	25427.9	13041.3		0.310337	0	6862	0.0519837	-0.0319647	20654.6	-16785		0.310337	0	6862	0.0369469	-0.00801066
0.387352	0	6863	0.0713814	0.000344522	1450.39	-351.244						0.387352	0	6863	0.0814017	0.010125	37749.1	-104790		0.387352	0	6863	0.00201013	9.48553e-06	41.1661	18.0927			0.387352	0	6863	0.00573922	-1.26426e-05	408.341	378.932		0.387352	0	6863	0.0121531	-0.000393194	-157.777	-982.382		0.387352	0	6863	0.0162516	-0.000202971
0.339435	0	6864	0.0646159	0.00353056	402.503	717.632						0.339435	0	6864	0.164065	-0.223909	62742.5	-13097.2		0.339435	0	6864	0.00143935	0.000174752	-53.96	-109.794			0.339435	0	6864	0.00516933	-0.000134335	188.841	87.8434		0.339435	0	6864	0.00965582	-0.000189964	-564.472	-861.767		0.339435	0	6864	0.0107343	0.000861493
0.312506	0	6868	0.0470628	-0.000227402	436.491	-435.741						0.312506	0	6868	0.0463735	0.0222803	-19760.1	1984.43		0.312506	0	6868	0.00121728	-7.42634e-05	-53.8864	149.35			0.312506	0	6868	0.00137586	6.03759e-05	-16.7276	240.364		0.312506	0	6868	0.00458553	-0.00112132	550.045	-484.559		0.312506	0	6868	0.00828545	-0.000897294
0.328674	0	6870	0.0608897	0.00281997	991.885	-2787.02						0.328674	0	6870	0.0662614	-0.00495327	11458.4	3446.15		0.328674	0	6870	0.00278074	0.000161517	250.538	92.8207			0.328674	0	6870	0.00311659	0.000424714	-80.3797	-230.676		0.328674	0	6870	0.0145082	-0.00204118	642.977	-1706.18		0.328674	0	6870	0.007191	-0.00303215
0.339213	0	6871	0.0350989	0.000280634	-74.6814	-1384.2						0.339213	0	6871	2.22391	0.70659	0	-6560.48		0.339213	0	6871	0.00237046	-0.000109328	332.884	-94.8883			0.339213	0	6871	0.00408197	6.15936e-05	237.355	552.86		0.339213	0	6871	0.00693102	-0.000409589	-883.952	3422.71		0.339213	0	6871	0.015096	0.00401574
0.436636	0	6879	0.0646596	0.0141146	-2827.3	-5563.85						0.436636	0	6879	0.0318335	-0.0265649	3009.89	12730.5		0.436636	0	6879	0.000974882	-4.31702e-05	216.089	183.776			0.436636	0	6879	0.00213802	-0.00012192	342.938	86.2682		0.436636	0	6879	0.0040671	-0.000839806	1201.04	-877.69		0.436636	0	6879	0.00785802	-0.00298306
0.341291	0	6889	0.0850204	-0.000736537	39.5096	3460.24						0.341291	0	6889	0.114422	-0.00635718	-14065	21532.7		0.341291	0	6889	0.00193054	0.00094241	434.884	-126.483			0.341291	0	6889	0.00599461	0.00026816	-920.99	986.467		0.341291	0	6889	0.0064588	-0.00361264	445.729	112.944		0.341291	0	6889	0.00899754	0.0021014
0.403962	0	6905	0.0830764	-0.00336563	574.182	-824.769						0.403962	0	6905	0.353664	-0.269297	-81073.7	24318.1		0.403962	0	6905	0.00217704	-7.26187e-06	-174.18	300.174			0.403962	0	6905	0.00826973	-0.0013265	-502.719	994.483		0.403962	0	6905	0.00571524	0.000355427	-360.935	-1731.01		0.403962	0	6905	0.00909049	0.000756021
0.486564	0	6921	0.0146208	-0.00084983	3757.56	2483.3						0.486564	0	6921	0.802261	1.62513	-20610.3	-7396.62		0.486564	0	6921	0.000339842	0.000143472	-138.372	-190.059			0.486564	0	6921	0.00130037	0.000269415	1479.12	-591.887		0.486564	0	6921	0.0132162	0.00219964	4704.77	-5859.17		0.486564	0	6921	0.0205374	0.00164379
0.301328	0	6927	0.0318996	-0.00135974	-1256.42	-2260.87						0.301328	0	6927	0.00916936	-0.00494979	589.764	2128.88		0.301328	0	6927	0.00125972	-9.32678e-05	39.7701	-39.2323			0.301328	0	6927	0.00688301	0.000284491	31.648	-105.328		0.301328	0	6927	0.0135384	0.000605743	131.212	-17.7367		0.301328	0	6927	0.00147267	0.000112813
0.466902	0	6944	0.0570055	0.00429084	-286.302	-8265.97						0.466902	0	6944	0.180632	0.163968	-35683.3	-15238.7		0.466902	0	6944	0.00265495	0.000206888	-139.949	-261.603			0.466902	0	6944	0.00570428	3.90065e-05	167.036	-586.744		0.466902	0	6944	0.018395	0.00165397	3173.11	1785.67		0.466902	0	6944	0.0108332	0.00852952
0.35489	0	6952	0.0676596	-0.00341651	-732.624	-1907.9						0.35489	0	6952	0.384955	0.0719214	-23579.2	-43290.9		0.35489	0	6952	0.000887958	-2.36079e-05	-165.672	110.692			0.35489	0	6952	0.0022346	-0.00054555	-605.274	448.41		0.35489	0	6952	0.0172893	0.000814703	-914.197	235.325		0.35489	0	6952	0.0150189	0.00607116
0.37792	0	6953	0.0272432	-0.0010252	815.952	-816.118						0.37792	0	6953	0.0795641	-0.0142757	33265	-22242.6		0.37792	0	6953	0.000915442	6.73381e-05	-62.014	18.4133			0.37792	0	6953	0.00156497	7.21114e-05	480.45	-195.52		0.37792	0	6953	0.00820193	-0.000310763	891.436	283.484		0.37792	0	6953	0.00316438	-0.000194108
0.457426	0	6978	0.0365427	0.000713134	-941.86	6562.54						0.457426	0	6978	0.0540957	0.0108804	-32990.6	-17458.1		0.457426	0	6978	0.00112193	-7.2242e-05	140.887	-17.3273			0.457426	0	6978	0.00443466	0.000390667	75.6691	-55.6234		0.457426	0	6978	0.00209022	-0.000476303	783.496	375.299		0.457426	0	6978	0.0033277	4.44499e-06
0.491132	0	6982	0.0672632	-0.00415287	-868.896	-2841.76						0.491132	0	6982	0.462986	-2.08496	0	-13752.7		0.491132	0	6982	0.000506524	-0.000130181	-353.658	117.049			0.491132	0	6982	0.00178312	-0.000322213	-1219.75	1195.89		0.491132	0	6982	0.0170952	-0.000307425	-1544	692.951		0.491132	0	6982	0.0116048	0.0063286
0.47513	0	6984	0.112002	0.000637031	-1712.15	-11522.7						0.47513	0	6984	0.235052	0.87118	107183	-114594		0.47513	0	6984	0.00297633	0.000316791	303.664	-316.312			0.47513	0	6984	0.00495851	-2.86276e-05	610.047	-49.8073		0.47513	0	6984	0.000754403	0.000731529	-726.798	-170.191		0.47513	0	6984	0.00954431	0.00159014
0.456013	0	6987	0.0155963	-0.000188759	-1464.37	8444.77						0.456013	0	6987	0.0125985	-0.00152788	16425.8	-19184.9		0.456013	0	6987	0.00168235	-4.41413e-05	-173.216	-15.6123			0.456013	0	6987	0.00354625	5.31059e-05	42.2583	-335.205		0.456013	0	6987	0.0030016	-3.74062e-05	-738.353	-805.275		0.456013	0	6987	0.000857773	7.9843e-05
0.305668	0	6995	0.039718	0.000225479	425.085	1123.7						0.305668	0	6995	0.0688724	0.0189418	-3883.06	-434.255		0.305668	0	6995	0.00168136	-0.000896141	-881.059	221.415			0.305668	0	6995	0.00169796	-0.00140047	618.272	191.979		0.305668	0	6995	0.00326757	-0.000292616	-1185.08	-170.069		0.305668	0	6995	0.00406625	0.00235887
0.397795	0	6999	0.0228902	0.00380762	763.691	-3617.25						0.397795	0	6999	0.0436171	-0.0157708	25724	-47078.8		0.397795	0	6999	0.00110863	0.000238277	21.2378	-380.912			0.397795	0	6999	0.00266518	0.000225162	27.8974	330.527		0.397795	0	6999	0.00118783	-6.58807e-05	506.481	316.562		0.397795	0	6999	0.00501336	-0.0019054
0.459393	0	7001	0.0814539	0.0143194	2779.79	-7740.28						0.459393	0	7001	0.442228	0.257829	-98680.7	75363		0.459393	0	7001	0.00115752	0.00013091	-98.0883	-345.93			0.459393	0	7001	0.00522413	0.000152688	79.8279	-260.116		0.459393	0	7001	0.0212309	-0.000852788	1011.98	-314.181		0.459393	0	7001	0.015909	0.00198081
0.300879	0	7002	0.0266392	-0.00127249	633.346	-1114.17						0.300879	0	7002	0.020144	0.0021213	-22.3405	-194.2		0.300879	0	7002	0.000571392	-6.72625e-05	-51.0881	-119.118			0.300879	0	7002	0.00399478	0.000293371	8.34761	-204.748		0.300879	0	7002	0.00917273	0.000493038	-2.49966	159.04		0.300879	0	7002	0.00195964	0.000173272
0.406863	0	7007	0.0306906	0.00129295	329.069	-570.58						0.406863	0	7007	0.0733411	0.0269312	-12167.4	-38701.3		0.406863	0	7007	0.00100294	-7.23075e-05	34.1152	-79.2598			0.406863	0	7007	0.0024241	-0.00032412	1.33356	-64.6879		0.406863	0	7007	0.00161453	0.000441001	-2675.92	-542.927		0.406863	0	7007	0.00246035	0.00143815
0.401367	0	7010	0.00557292	-0.000301409	260.781	50.7987						0.401367	0	7010	0.0199639	0.0260861	-11127.9	-22120.1		0.401367	0	7010	0.00014975	2.3656e-05	29.2981	9.00213			0.401367	0	7010	0.000443982	-3.42745e-05	196.518	50.7549		0.401367	0	7010	0.00156464	-0.000121159	604.367	400.05		0.401367	0	7010	0.0012625	-0.000390297
0.411762	0	7012	0.0112163	-0.014201	539.793	308.107						0.411762	0	7012	0.00489234	-0.00165685	-17981.8	-18228.9		0.411762	0	7012	0.000229652	-6.22082e-06	13.416	-0.912265			0.411762	0	7012	0.000596265	0.000113015	67.0161	86.2572		0.411762	0	7012	0.00072733	-0.000163016	274.94	-4.0864		0.411762	0	7012	0.00111434	0.000319488
0.467138	0	7024	0.000421557	-0.000195575	-117.992	-322.357						0.467138	0	7024	0.00229305	-0.000948525	-2302.18	-1090.27		0.467138	0	7024	9.9496e-05	-1.73873e-06	-18.5388	-35.2322			0.467138	0	7024	0.000421244	-8.54945e-05	37.4157	33.9988		0.467138	0	7024	0.000170099	-4.45729e-05	212.553	88.5501		0.467138	0	7024	0.0004269	7.39667e-05
0.34879	0	7038	0.00635859	-0.000361363	-722.23	1611.48						0.34879	0	7038	0.0431792	-0.0197269	22477.3	-20989.2		0.34879	0	7038	0.000469055	4.70798e-06	-55.6496	17.7693			0.34879	0	7038	0.000230307	3.47065e-05	17.3477	145.392		0.34879	0	7038	0.00345716	0.000166461	-260.549	-40.4916		0.34879	0	7038	0.00079179	-0.000114345
0.474669	0	7040	0.0166396	-0.00136098	-653.255	-1928.55						0.474669	0	7040	0.0430121	-0.0131656	-48421.7	-10121.2		0.474669	0	7040	0.000634807	4.30394e-05	81.7646	-114.267			0.474669	0	7040	0.00127674	0.000331914	-454.752	26.5612		0.474669	0	7040	0.00505367	1.46013e-05	1106.09	-740.06		0.474669	0	7040	0.00637493	-0.00195169
0.462638	0	7043	0.0193467	-0.000494653	3314.02	5191.59						0.462638	0	7043	0.0122008	0.00187644	-11273.8	1817.37		0.462638	0	7043	0.000191987	-6.67722e-06	62.2261	0.6791			0.462638	0	7043	0.000764054	-0.00021603	10.9776	101.113		0.462638	0	7043	0.00314536	0.00051139	586.912	-989.152		0.462638	0	7043	0.00145856	-0.000181353
0.368496	0	7046	0.0143058	-0.00156342	653.46	-3358.38						0.368496	0	7046	0.0278957	-0.000603456	-2212.93	-386.909		0.368496	0	7046	0.000649586	-6.20226e-05	-86.0984	88.8909			0.368496	0	7046	0.00349987	0.000278227	227.663	-82.1127		0.368496	0	7046	0.00751854	0.000369365	-102.573	171.517		0.368496	0	7046	0.00214545	0.000138017
0.329436	0	7049	0.0340961	0.00106472	-844.908	4763.38						0.329436	0	7049	0.0309107	0.0215458	30135	15389.8		0.329436	0	7049	0.000681374	-0.00022241	122.409	188.995			0.329436	0	7049	0.00128024	0.000443698	-360.788	-298.638		0.329436	0	7049	0.00660769	-0.000520012	947.894	-560.876		0.329436	0	7049	0.00460308	-0.000924196
0.468398	0	7052	0.0343569	0.00308295	1099.97	-1544.28						0.468398	0	7052	0.127478	-0.00681168	22912.2	-24461.5		0.468398	0	7052	0.000481615	0.000115174	30.2534	-75.8049			0.468398	0	7052	0.00179428	0.00019147	-827.239	-147.948		0.468398	0	7052	0.00685683	-0.00010822	-929.433	580.057		0.468398	0	7052	0.00659612	-0.000428993
0.41535	0	7055	0.00415289	0.000606074	-1230.56	1260.45						0.41535	0	7055	0.00191378	0.000625149	876.01	-26.2377		0.41535	0	7055	0.000575543	-4.8935e-05	9.01205	72.9123			0.41535	0	7055	0.000800163	8.48282e-05	-282.354	-133.399		0.41535	0	7055	0.000937944	-7.98481e-05	-465.163	2.07979		0.41535	0	7055	0.000629721	0.000175811
0.36777	0	7057	0.0428135	-0.00337018	951.881	-1070.29						0.36777	0	7057	0.0976227	0.0145875	68343.2	-19429.7		0.36777	0	7057	0.000639928	-5.11844e-05	184.789	-106.666			0.36777	0	7057	0.00439123	-0.000201269	82.9327	-593.535		0.36777	0	7057	0.00720193	0.000578304	898.738	734.064		0.36777	0	7057	0.00505176	0.00183506
0.367186	0	7065	0.0567157	0.00190976	-308.881	-4252.22						0.367186	0	7065	0.0362537	0.0380562	49979.3	-42650.1		0.367186	0	7065	0.00132796	0.000185538	-86.9721	-284.781			0.367186	0	7065	0.00193983	-9.2644e-05	-524.185	-184.516		0.367186	0	7065	0.00257038	-2.85168e-05	348.064	-490.929		0.367186	0	7065	0.0084878	-0.00237556
0.483453	0	7069	0.0375678	-0.0026066	-4802.68	-4741.34						0.483453	0	7069	0.0766392	0.0392473	-18056.8	-82667		0.483453	0	7069	0.00128007	-6.72428e-05	316.614	-138.324			0.483453	0	7069	0.0030723	-9.99438e-05	26.2824	-787.287		0.483453	0	7069	0.00898692	-3.94106e-05	202.976	-356.812		0.483453	0	7069	0.00309001	0.00059383
0.463626	0	7075	0.101285	-0.00180926	1905.16	2001.32						0.463626	0	7075	2.30864	0.337682	-272528	313682		0.463626	0	7075	0.00214596	-0.000183899	-210.622	203.131			0.463626	0	7075	0.00640876	-0.00120355	1039.76	-1474.87		0.463626	0	7075	0.00613322	-0.00232003	-9305.84	130.672		0.463626	0	7075	0.0224291	0.00345964
0.492151	0	7076	0.023023	-0.000524106	4135.68	6798.49						0.492151	0	7076	0.00877921	0.00370978	-4073.47	10786.6		0.492151	0	7076	0.000236785	-7.97944e-06	78.1473	17.8981			0.492151	0	7076	0.000973444	-0.000236976	77.673	159.72		0.492151	0	7076	0.00352245	0.000458159	667.916	-1313.65		0.492151	0	7076	0.00234011	-0.000509121
0.418181	0	7111	0.0898173	-0.00146911	-992.099	-777.851						0.418181	0	7111	0.96023	-2.48618	162.496	24886.3		0.418181	0	7111	0.000627318	6.56828e-05	444.404	-240.78			0.418181	0	7111	0.00205119	-0.000366384	-56.3061	71.9383		0.418181	0	7111	0.0192023	-0.00418134	-1091.71	1244.02		0.418181	0	7111	0.00409411	0.000368186
0.313987	0	7121	0.0352291	-0.00204288	116.596	54.5701						0.313987	0	7121	0.0240114	0.022524	-17972.4	4682.82		0.313987	0	7121	0.00129203	-2.02517e-05	16.2391	6.26731			0.313987	0	7121	0.00144295	-0.000250563	-266.17	59.8635		0.313987	0	7121	0.00752229	-0.000519884	-218.668	-787.48		0.313987	0	7121	0.0122122	-0.000346284
0.402175	0	7123	0.00144051	-0.000217967	-240.107	674.934						0.402175	0	7123	0.0354174	-0.00646789	-621.064	8924		0.402175	0	7123	0.000122428	3.53566e-05	-12.076	0.950735			0.402175	0	7123	3.89104e-05	-1.0444e-05	57.8029	35.3491		0.402175	0	7123	0.00146515	0.000339288	-27.9406	-55.4146		0.402175	0	7123	0.000548752	-0.000137769
0.391634	0	7128	0.0730319	-0.00104817	981.676	4134.65						0.391634	0	7128	0.0123262	0.0214613	33482.5	-46136.8		0.391634	0	7128	0.00070626	5.55376e-05	-118.889	-85.909			0.391634	0	7128	0.00349282	0.000220519	-257.48	-345.274		0.391634	0	7128	0.00498567	-0.000424461	-27.5836	234.64		0.391634	0	7128	0.00164105	-0.00025037
0.459313	0	7129	0.0854715	0.00839666	-1034.32	-10462.7						0.459313	0	7129	0.0576647	0.0163578	-59520.8	-31330.8		0.459313	0	7129	0.00305426	-0.00182634	-557.684	-575.571			0.459313	0	7129	0.00418972	-0.00691442	-1460.69	2210.31		0.459313	0	7129	0.00205307	0.000790387	-362.41	2111.59		0.459313	0	7129	0.00351745	-0.00153315
0.486273	0	7134	0.00697833	0.000347253	2046.45	-250.855						0.486273	0	7134	2.47207	-0.743034	-200396	12976.7		0.486273	0	7134	0.00117194	-8.38689e-05	13.1244	679.817			0.486273	0	7134	0.0174454	0.0049455	-9140.82	56804.4		0.486273	0	7134	0.0197197	0.00528207	4238.18	-16180.1		0.486273	0	7134	0.0160954	-0.0101009
0.335664	0	7151	0.0279995	-0.000768635	189.677	-262.097						0.335664	0	7151	0.116529	8.32701e-05	-1827.55	-17930.3		0.335664	0	7151	0.001477	6.50379e-05	-58.2488	-68.2967			0.335664	0	7151	0.00168854	-0.00027304	31.5247	143.944		0.335664	0	7151	0.00806413	-0.0001503	261.381	-552.419		0.335664	0	7151	0.00641699	-0.000101622
0.445589	0	7153	0.0179545	-0.000529237	-791.872	525.995						0.445589	0	7153	3.57491	-0.61548	0	-11320.3		0.445589	0	7153	0.00456736	0.000909798	-591.626	-2020.72			0.445589	0	7153	0.0622299	-0.0222138	2437.21	76583.2		0.445589	0	7153	0.937427	1.8991	-49469.9	168212		0.445589	0	7153	2.50226	1.94979
0.305842	0	7154	0.0460842	0.034084	-1247.19	-4054.34						0.305842	0	7154	0.0422954	-0.0188768	13666	-16997.8		0.305842	0	7154	0.000402888	-0.00016923	85.236	-83.0613			0.305842	0	7154	0.00130483	-0.00182538	109.702	-18.6871		0.305842	0	7154	0.00377223	0.00150431	257.657	157.112		0.305842	0	7154	0.00412909	0.0122312
0.359743	0	7160	0.00997803	7.56248e-05	532.93	-459.142						0.359743	0	7160	0.033365	-0.00352093	5844.26	10488.9		0.359743	0	7160	8.94865e-05	-0.00186998	106.133	18.288			0.359743	0	7160	0.000325299	0.00100152	161.621	213.131		0.359743	0	7160	0.000456539	0.000102768	608.152	-309.611		0.359743	0	7160	0.00234774	-0.000313803
0.414386	0	7163	0.0233231	-0.000235128	2350.79	5618.07						0.414386	0	7163	0.0380991	0.000592385	-4969.36	17869		0.414386	0	7163	0.000108403	-9.27181e-06	103.584	-37.6104			0.414386	0	7163	0.00222422	-0.000210038	215.152	-151.556		0.414386	0	7163	0.0055937	0.000332466	471.385	-793.428		0.414386	0	7163	0.0017011	-5.52704e-05
0.372407	0	7164	0.0797536	-0.00219374	-723.65	-869.124						0.372407	0	7164	0.12469	-1.42993	0	-7907.27		0.372407	0	7164	0.00207361	0.000114356	175.722	-32.2555			0.372407	0	7164	0.00861734	-0.00029821	593.759	365.223		0.372407	0	7164	0.0211985	0.00103722	2042.15	682.418		0.372407	0	7164	0.00901146	1.20092e-05
0.360828	0	7166	0.0214519	0.00258827	471.286	2188.84						0.360828	0	7166	0.0329554	-0.00150918	-3289.01	1640.25		0.360828	0	7166	0.000465725	-5.28738e-05	74.932	0.93532			0.360828	0	7166	0.00208781	0.000128992	100.24	-20.2651		0.360828	0	7166	0.00056977	-0.000114407	291.075	489.522		0.360828	0	7166	0.000307657	0.000103555
0.337821	0	7167	0.0630993	0.00465605	147.152	-4741.68						0.337821	0	7167	1.33008	-0.0625485	143280	-80226.7		0.337821	0	7167	0.0016474	-0.000151209	-339.181	-210.304			0.337821	0	7167	0.00503964	-0.000172731	378.899	-325.367		0.337821	0	7167	0.0188062	-0.00613777	922.386	-2465.44		0.337821	0	7167	0.00556515	0.00408562
0.339328	0	7185	0.0714738	0.00144768	1620.82	-1117.07						0.339328	0	7185	0.101598	0.0238829	-31139.2	-28630.8		0.339328	0	7185	0.00150983	0.000144036	78.1923	-105.868			0.339328	0	7185	0.007062	0.000447235	-315.096	-519.767		0.339328	0	7185	0.0120544	0.00743343	-578.599	-699.589		0.339328	0	7185	0.00903518	-0.000868067
0.353561	0	7186	0.0819826	-0.000877334	-435.008	841.727						0.353561	0	7186	0.110022	-0.0145666	33213.9	33785.2		0.353561	0	7186	0.00144515	-7.30899e-05	-45.9758	31.4841			0.353561	0	7186	0.0045539	0.000450052	-487.447	-526.568		0.353561	0	7186	0.0056263	0.000104762	-468.452	-918.301		0.353561	0	7186	0.00383372	-0.000293573
0.377202	0	7200	0.0860241	-0.00110376	-4869.32	2483.79						0.377202	0	7200	1.56711	-1.91747	-286109	297298		0.377202	0	7200	0.00134641	0.000175077	-247.353	-302.512			0.377202	0	7200	0.00281645	0.000257623	-440.856	111.765		0.377202	0	7200	0.0150109	-0.000101157	-446.898	-129.965		0.377202	0	7200	0.00507906	0.00012221
0.385843	0	7210	0.00181098	6.32686e-06	-277.619	-52.1161						0.385843	0	7210	0.00829657	5.96445e-06	440.974	1083.19		0.385843	0	7210	0.000443853	-6.8312e-06	68.9836	75.0148			0.385843	0	7210	0.00078069	0.000105889	-111.192	-59.9211		0.385843	0	7210	0.00277738	-0.000393612	-290.158	98.183		0.385843	0	7210	0.00165339	0.000221376
0.306234	0	7221	0.0630422	-0.00560869	-912.529	-3560.74						0.306234	0	7221	0.185397	-0.242038	0	-5346.86		0.306234	0	7221	0.000633351	-3.63842e-05	216.036	-85.8223			0.306234	0	7221	0.00191736	0.00141297	-17.3035	-255.361		0.306234	0	7221	0.00808342	0.00150108	346.027	396.5		0.306234	0	7221	0.0143648	-0.00216892
0.389432	0	7230	0.0575622	6.84904e-05	986.56	143.998						0.389432	0	7230	1.03298	0.176451	14147.4	31004.3		0.389432	0	7230	0.0024611	-7.04281e-05	-105.694	-81.6362			0.389432	0	7230	0.00516241	-2.71873e-05	-131.17	634.293		0.389432	0	7230	0.0122289	0.000578258	2861.7	641.214		0.389432	0	7230	0.0107904	-0.000842657
0.465356	0	7234	0.0504464	-0.00131257	2459.5	-570.876						0.465356	0	7234	0.085648	-0.00511738	20062.7	40989.8		0.465356	0	7234	0.000536242	4.01454e-05	-245.057	3.48523			0.465356	0	7234	0.00271088	8.72449e-05	-216.594	89.7882		0.465356	0	7234	0.0045199	-0.000710993	544.312	-588.337		0.465356	0	7234	0.00335673	-0.00036193
0.375332	0	7245	0.0923277	-0.00193691	218.415	934.869						0.375332	0	7245	1.8783	-0.237174	-508.27	52634.6		0.375332	0	7245	0.000872436	-0.000572555	-72.0107	309.521			0.375332	0	7245	0.00289206	0.000731754	-292.985	-73.5713		0.375332	0	7245	0.0143295	-0.00130007	-933.509	-7158.85		0.375332	0	7245	0.00902703	0.00164606
0.410713	0	7253	0.0687005	-0.00302699	-325.146	7441.91						0.410713	0	7253	1.10377	-1.09385	108646	173114		0.410713	0	7253	0.00130968	0.0010928	-167.534	-637.448			0.410713	0	7253	0.00770222	0.000638493	223.296	270.091		0.410713	0	7253	0.00602271	-0.000128229	-124.244	537.658		0.410713	0	7253	0.011183	-0.00164038
0.352413	0	7274	0.0219213	0.00254137	468.783	-522.614						0.352413	0	7274	0.0555961	0.0198364	-28889.4	4423.45		0.352413	0	7274	0.000716355	-9.85412e-05	-48.6781	12.8848			0.352413	0	7274	0.00126175	-0.000145118	413.655	-139.608		0.352413	0	7274	0.00725534	0.000885955	853.041	-104.039		0.352413	0	7274	0.0028555	-0.000406407
0.436289	0	7286	0.119678	0.0134195	-1241.33	-9329.35						0.436289	0	7286	0.170694	-0.37663	-5913.53	-149983		0.436289	0	7286	0.00262375	0.000584915	943.286	-167.875			0.436289	0	7286	0.00488124	-0.000946922	444.369	-356.226		0.436289	0	7286	0.0014798	-0.00111851	-3825.77	815.526		0.436289	0	7286	0.00175973	-0.00380904
0.386408	0	7302	0.0163977	-0.00138146	-1640.13	510.524						0.386408	0	7302	0.00948564	0.00224397	-1517.75	-2696.96		0.386408	0	7302	0.000546556	-7.27917e-05	48.7468	53.4685			0.386408	0	7302	0.00190654	-6.14331e-06	223.995	-102.313		0.386408	0	7302	0.00273578	-3.72126e-05	343.521	723.899		0.386408	0	7302	0.00230447	-0.000142061
0.456173	0	7306	0.00153762	0.000151217	-263.036	-112.552						0.456173	0	7306	0.00550866	0.000685039	685.952	1308.29		0.456173	0	7306	0.000315198	-3.41201e-05	56.7903	74.7014			0.456173	0	7306	0.000461351	0.000101037	-105.23	-59.8987		0.456173	0	7306	0.00168412	-0.000388253	-291.022	77.8635		0.456173	0	7306	0.00100731	0.000240201
0.492587	0	7320	0.0784725	5.0199e-06	85.2067	-4922.84						0.492587	0	7320	0.171866	-0.00928447	8874.86	75084.9		0.492587	0	7320	0.00285546	-0.000467259	176.172	-69.6026			0.492587	0	7320	0.00546683	-8.04763e-05	843.946	-711.423		0.492587	0	7320	0.00957469	0.00288774	14018.9	-3320.08		0.492587	0	7320	0.0249968	-0.000645416
0.462413	0	7322	0.0687712	-0.000182336	420.728	-1470.7						0.462413	0	7322	0.109351	0.00157375	-14654.5	100014		0.462413	0	7322	0.00131495	-0.000139113	-185.797	498.503			0.462413	0	7322	0.00131564	0.000218285	788.818	483.766		0.462413	0	7322	0.0114685	0.000580951	-190.882	-2423.08		0.462413	0	7322	0.0016905	9.06712e-05
0.358953	0	7335	0.0284079	0.00155959	2242.75	4132.57						0.358953	0	7335	0.0299717	0.000140053	-15709	830.187		0.358953	0	7335	0.000231182	-4.94278e-06	53.4658	10.3129			0.358953	0	7335	0.00144342	-0.000297998	84.7229	100.158		0.358953	0	7335	0.00428875	0.000454046	396.79	-835.294		0.358953	0	7335	0.0042113	-0.000886993
0.322312	0	7339	0.0804555	-0.000395996	644.145	940.241						0.322312	0	7339	0.473839	0.393084	0	-5923.03		0.322312	0	7339	0.00219094	-0.000105692	-15.796	80.7979			0.322312	0	7339	0.00414889	-0.000523869	404.552	162.601		0.322312	0	7339	0.0138065	0.000396596	-921.61	-1534.92		0.322312	0	7339	0.0155976	-8.43571e-05
0.312077	0	7346	0.0344581	0.0010671	-129.609	4429.06						0.312077	0	7346	0.0932019	-0.402498	-35732.8	44105.3		0.312077	0	7346	0.000446565	-7.4698e-06	27.0682	13.2533			0.312077	0	7346	0.00362272	-0.000224094	327.876	-193.627		0.312077	0	7346	0.00359755	0.000357565	397.241	-37.3124		0.312077	0	7346	0.0120203	-5.35343e-05
0.318723	0	7352	0.0800932	6.36756e-05	-415.382	2267.33						0.318723	0	7352	0.142441	-0.0479594	51746.6	36971.5		0.318723	0	7352	0.002181	0.000703717	699.911	-5575.03			0.318723	0	7352	0.00572752	-0.00374647	2922.82	262.732		0.318723	0	7352	0.00361525	0.00254643	1539.45	-87.7481		0.318723	0	7352	0.00733741	-0.00258919
0.329093	0	7370	0.093545	-0.00308029	1145.21	1697.56						0.329093	0	7370	2.29578	-0.000139916	-30213.2	-87771.1		0.329093	0	7370	0.000701292	-0.000374885	145.431	235.826			0.329093	0	7370	0.00784695	-0.000535619	-565.615	-514.871		0.329093	0	7370	0.0119434	-0.00570249	3599.69	4818.28		0.329093	0	7370	0.0233473	0.00429049
0.449751	0	7371	0.0292027	-0.00239912	1034.99	-565.306						0.449751	0	7371	0.0375159	0.00759132	22535.2	3461.45		0.449751	0	7371	0.000563946	2.1435e-05	74.3436	172.633			0.449751	0	7371	0.00230694	4.75059e-05	-298.499	162.813		0.449751	0	7371	0.00806651	-0.000279289	849.67	-1184.71		0.449751	0	7371	0.00377083	0.000693729
0.348141	0	7388	0.104601	0.00054706	580.957	-1621.59						0.348141	0	7388	0.912626	-1.53389	-145193	-14333.1		0.348141	0	7388	0.00212731	6.41317e-05	80.0848	-132.683			0.348141	0	7388	0.0135142	7.59974e-05	356.729	22.3342		0.348141	0	7388	0.0181657	0.00195681	1155.36	-1552.99		0.348141	0	7388	0.0143193	-0.00108281
0.325554	0	7412	0.00650543	0.000518328	-213.987	3037.65						0.325554	0	7412	0.0218299	-0.00167747	3909.98	1771.83		0.325554	0	7412	0.000536065	-2.97119e-05	17.7296	27.1353			0.325554	0	7412	0.00101603	2.64518e-05	21.4421	63.4388		0.325554	0	7412	0.00209106	-8.369e-05	-502.542	-78.6063		0.325554	0	7412	0.000363193	-2.70787e-05
0.401169	0	7414	0.0478901	-0.00515566	1540.71	5364.46						0.401169	0	7414	2.3948	-2.40139	131098	-256250		0.401169	0	7414	0.00081823	0.000122071	-318.269	-105.763			0.401169	0	7414	0.0083563	0.00042056	-909.668	-562.555		0.401169	0	7414	0.0213092	0.0104232	-507.643	2658.39		0.401169	0	7414	0.0160414	-0.00371495
0.345695	0	7419	0.110969	-0.000682004	1207.38	-902.587						0.345695	0	7419	1.86312	-3.40779	0	-6813.61		0.345695	0	7419	0.00305426	-0.00337331	571.854	1231.76			0.345695	0	7419	0.00523531	0.00116838	-1742.94	-484.909		0.345695	0	7419	0.0197345	0.00146207	2239.59	-4024.29		0.345695	0	7419	0.0142344	0.000110015
0.423882	0	7421	0.0510006	-0.00293269	470.127	7230.31						0.423882	0	7421	0.0585166	0.0230991	25555.8	17687.4		0.423882	0	7421	0.00081478	0.00174643	-280.7	-265.261			0.423882	0	7421	0.00504342	0.00141083	1252.01	1710.43		0.423882	0	7421	0.00784959	-0.00430906	-15.4853	2455.19		0.423882	0	7421	0.006499	-0.00564482
0.305512	0	7422	0.107686	0.000429155	-14.1276	-1310.53						0.305512	0	7422	0.521617	-0.403222	0	-5321.65		0.305512	0	7422	0.00215001	0.000163091	2.4421	-89.4896			0.305512	0	7422	0.0133237	0.000104432	251.244	44.7992		0.305512	0	7422	0.0181852	0.000486016	-3.68595	-1528.98		0.305512	0	7422	0.0151611	0.000172166
0.355598	0	7430	0.131474	0.00173558	79.4891	-5921.98						0.355598	0	7430	1.22296	-0.148358	188.121	19712.8		0.355598	0	7430	0.00112069	0.000204866	77.3237	222.393			0.355598	0	7430	0.005601	0.00018375	-825.351	-365.513		0.355598	0	7430	0.00326541	0.000327429	1103.35	-280.538		0.355598	0	7430	0.0286791	-0.00054568
0.400659	0	7434	0.0199994	0.000451458	-1502.92	7785.67						0.400659	0	7434	0.0205568	0.0062602	5925.49	-7542.79		0.400659	0	7434	0.000854859	-0.000276778	-293.594	186.381			0.400659	0	7434	0.00415218	0.000268599	98.4911	-281.757		0.400659	0	7434	0.00856647	0.0012137	-37.7655	-631.128		0.400659	0	7434	0.00157486	0.000219577
0.37547	0	7439	0.00575292	-0.000176886	-498.182	110.168						0.37547	0	7439	0.00872617	0.00138712	77.2142	-469.102		0.37547	0	7439	0.000910764	-1.45444e-06	62.7412	130.417			0.37547	0	7439	0.00103053	0.000145436	-207.99	-144.997		0.37547	0	7439	0.0029264	-0.000419566	-535.466	77.0952		0.37547	0	7439	0.00192222	0.000282745
0.37662	0	7454	0.0406755	-0.000387316	108.981	-306.117						0.37662	0	7454	0.0549342	-0.014768	-14766.7	-26082.6		0.37662	0	7454	0.0006275	1.93896e-05	-104.992	-3.69574			0.37662	0	7454	0.000811836	-8.78952e-05	294.325	-188.851		0.37662	0	7454	0.00298564	0.000840115	188.867	291.361		0.37662	0	7454	0.0117513	0.00126582
0.479546	0	7457	0.00209599	-5.17138e-05	-87.2397	-657.633						0.479546	0	7457	0.0012247	-0.000264499	1033.94	130.778		0.479546	0	7457	0.000294938	4.32703e-05	168.78	24.0398			0.479546	0	7457	0.000623707	6.68981e-05	-163.172	-128.923		0.479546	0	7457	0.0029978	-0.000468725	49.2364	201.073		0.479546	0	7457	0.00235477	0.000104669
0.488034	0	7458	0.089741	-0.00676265	1478.2	-2316.9						0.488034	0	7458	0.199791	0.484007	99153.2	97394.4		0.488034	0	7458	0.00203588	-0.000129773	160.235	96.795			0.488034	0	7458	0.0109316	-0.000830416	-1316.7	1480.1		0.488034	0	7458	0.0172527	-8.19837e-05	2851.66	2542.93		0.488034	0	7458	0.0151436	-8.13113e-05
0.457806	0	7460	0.000497754	0.000176713	-61.9073	-108.051						0.457806	0	7460	0.00331794	0.00151663	-742.182	755.45		0.457806	0	7460	0.000343381	6.0696e-05	-70.9792	-58.9453			0.457806	0	7460	0.00098687	-0.000130086	-206.385	-141.701		0.457806	0	7460	0.00232835	-0.000275687	315.644	268.094		0.457806	0	7460	0.00033043	-5.66705e-05
0.365626	0	7462	0.0098381	-0.00204934	287.809	2954.96						0.365626	0	7462	3.01564	-2.00656	0	-7621.91		0.365626	0	7462	0.00451481	3.97361e-05	-239.92	-93.9137			0.365626	0	7462	0.01896	-0.00111917	-12517.5	8325.65		0.365626	0	7462	0.0527465	-0.0293906	-68790	-5227.27		0.365626	0	7462	0.00789206	0.0223057
0.3358	0	7466	0.0218475	0.00572407	-488.327	-444.117						0.3358	0	7466	0.0122862	0.00517813	7491.08	-3064.89		0.3358	0	7466	4.59748e-05	-1.22541e-05	-11.5783	-1.03275			0.3358	0	7466	0.000186376	-0.000172509	19.4718	-14.2959		0.3358	0	7466	0.00106932	-0.00125733	249.214	110.745		0.3358	0	7466	0.00225062	-0.00134955
0.395572	0	7476	0.0348898	0.00300882	281.629	3794.63						0.395572	0	7476	0.0145938	0.00685152	-917.44	1579.92		0.395572	0	7476	0.00124974	0.00025722	-11.0807	-52.5655			0.395572	0	7476	0.00311358	-0.000407138	-224.984	-483.171		0.395572	0	7476	0.0129692	-0.000242683	-1884.42	-1385.71		0.395572	0	7476	0.00561259	2.40942e-06
0.348243	0	7493	0.0344714	-0.000472646	352.775	-235.042						0.348243	0	7493	0.0157467	0.000101945	824.928	-337.644		0.348243	0	7493	0.0008083	-5.79879e-05	-60.8686	-188.101			0.348243	0	7493	0.00359518	0.000181541	-308.464	-420.838		0.348243	0	7493	0.00970514	0.000313379	-215.129	369.104		0.348243	0	7493	0.00307441	5.97928e-05
0.484448	0	7531	0.0408993	0.00142731	-352.357	-781.834						0.484448	0	7531	0.00813177	-0.000225367	-2718.95	-537.134		0.484448	0	7531	0.000546391	-0.00014183	160.659	92.283			0.484448	0	7531	0.00278642	-0.000540597	-289.904	25.2167		0.484448	0	7531	0.0086043	0.000428371	-1402.19	612.804		0.484448	0	7531	0.00555418	-0.000570447
0.364236	0	7536	0.0674585	-0.00239102	2084.19	4283.89						0.364236	0	7536	2.03656	-0.236657	13287.6	-432686		0.364236	0	7536	0.000729919	0.00025798	-85.9654	-176.825			0.364236	0	7536	0.0102519	-0.00067606	-651.392	-704.851		0.364236	0	7536	0.0269859	-0.00842126	7599.84	6098.89		0.364236	0	7536	0.0256194	0.00591797
0.45074	0	7545	0.0149652	0.000601002	-777.331	356.058						0.45074	0	7545	3.20818	-1.38207	208536	457493		0.45074	0	7545	0.000333443	-0.000217091	-74.0049	-145.764			0.45074	0	7545	0.0202713	0.024655	-9170.88	9678.51		0.45074	0	7545	0.0119079	0.00496708	-14788	30170.6		0.45074	0	7545	0.0141449	0.0336662
0.352412	0	7548	0.0862191	0.00121116	-373.87	-6757.98						0.352412	0	7548	0.637725	-1.02211	0	-7080.97		0.352412	0	7548	0.0032369	2.08655e-05	-237.468	-289.788			0.352412	0	7548	0.00550612	-0.000469684	310.807	227.535		0.352412	0	7548	0.00562569	-0.00363018	403.01	-6822.57		0.352412	0	7548	0.0265961	-0.00698977
0.415462	0	7553	0.00983975	0.000774642	-1511.84	-968.46						0.415462	0	7553	0.956298	-0.121057	389954	211444		0.415462	0	7553	0.00164435	0.000169291	-256.686	126.851			0.415462	0	7553	0.00571375	-4.94801e-05	-3541.66	2065.76		0.415462	0	7553	0.0192491	0.00363398	1909.13	139.554		0.415462	0	7553	0.0204208	0.0103316
0.452049	0	7555	0.0140356	-0.00174031	62.8357	-631.705						0.452049	0	7555	0.0329592	0.01336	-1734.37	25199		0.452049	0	7555	0.000272458	-3.54067e-05	55.5166	-31.3717			0.452049	0	7555	0.000692874	-0.000301487	-252.589	-263.19		0.452049	0	7555	0.00284792	0.000674842	-852.87	3480.75		0.452049	0	7555	0.00321046	-0.00122855
0.459213	0	7559	0.0686629	-0.00208696	-1402.78	-11496.4						0.459213	0	7559	3.75432	-0.992184	0	-12023.2		0.459213	0	7559	0.00413773	-0.000253788	-319.975	-346.208			0.459213	0	7559	0.00618397	0.000847487	1761.7	-212.198		0.459213	0	7559	0.0207305	0.00572102	-2349.27	-9424.48		0.459213	0	7559	0.013935	0.00508042
0.458206	0	7560	0.00811803	0.000740173	1223.34	233.522						0.458206	0	7560	0.551713	0.619099	0	-11970.5		0.458206	0	7560	0.000332596	0.000102491	-72.8205	-0.289918			0.458206	0	7560	0.00117505	0.000347094	395.119	-605.418		0.458206	0	7560	0.00930616	0.000415689	1615.71	505.868		0.458206	0	7560	0.0163669	-0.00510148
0.370761	0	7568	0.0168681	-0.000233835	-1446.12	309.02						0.370761	0	7568	0.00871721	0.00155207	2098.8	-2150.34		0.370761	0	7568	0.000520938	-6.14032e-05	53.7243	55.5626			0.370761	0	7568	0.00216751	-1.44142e-05	167.261	-68.9339		0.370761	0	7568	0.00330284	-5.9825e-05	348.189	667.472		0.370761	0	7568	0.00232401	-4.40164e-05
0.36605	0	7579	0.0282492	-0.00161086	-369.13	-244.781						0.36605	0	7579	0.0660464	-0.00225973	-23051.5	-730.275		0.36605	0	7579	0.000530264	3.69782e-05	-139.868	-32.2258			0.36605	0	7579	0.00163048	-3.45604e-05	-257.117	-21.2767		0.36605	0	7579	0.00926224	-0.000795595	-351.458	564.866		0.36605	0	7579	0.0092238	-0.00235452
0.456973	0	7588	0.00631215	-6.58028e-05	-3802.45	2680.14						0.456973	0	7588	1.96206	3.47555	22554.8	311442		0.456973	0	7588	0.00140239	-0.00041439	-78.1276	-129.36			0.456973	0	7588	0.0303126	-0.00611264	9047.64	-6084.76		0.456973	0	7588	0.0477152	0.0124356	29293.9	-21812.4		0.456973	0	7588	0.00720443	-0.036562
0.462609	0	7601	0.023995	-0.00209542	2962.83	3730.79						0.462609	0	7601	0.0431192	-0.0227904	41810.5	-660.685		0.462609	0	7601	0.000375372	1.27739e-05	19.8472	22.1463			0.462609	0	7601	0.00175166	-0.000151471	72.7433	20.4459		0.462609	0	7601	0.00443728	0.000354538	279.546	-747.957		0.462609	0	7601	0.00524812	-0.000329063
0.399029	0	7604	0.00830721	0.000212328	-1197.28	2923.14						0.399029	0	7604	0.052024	0.00525483	18358.4	-16104.1		0.399029	0	7604	0.000597219	3.67578e-05	-99.3513	39.9287			0.399029	0	7604	0.000282284	1.42425e-05	-4.35133	263.561		0.399029	0	7604	0.00428102	0.000327784	-409.775	-54.4411		0.399029	0	7604	0.00111884	-0.000102187
0.480138	0	7609	0.0637867	0.00113541	359.432	-2733.33						0.480138	0	7609	0.00421164	-0.0214422	-32847.3	-13557.9		0.480138	0	7609	0.00167544	8.8915e-05	-307.572	852.601			0.480138	0	7609	0.00121468	-0.000322815	215.3	680.856		0.480138	0	7609	0.00395177	-0.0030205	1192.9	-4002.64		0.480138	0	7609	0.0109995	0.0011842
0.480739	0	7615	0.0327364	-0.000164945	179.292	98.693						0.480739	0	7615	0.0106752	-0.00181153	-25268.7	-9856		0.480739	0	7615	0.0012116	-5.98361e-05	70.0241	-0.877433			0.480739	0	7615	0.00123707	8.37811e-05	-560.032	88.9326		0.480739	0	7615	0.00672447	-0.000340812	-548.684	-1683.81		0.480739	0	7615	0.0118265	-0.000230795
0.483916	0	7621	0.0180765	0.00164836	399.16	1409.7						0.483916	0	7621	0.0197075	0.00331646	-8114.64	-3415.34		0.483916	0	7621	0.000490567	9.38172e-05	76.2642	17.6348			0.483916	0	7621	0.00118967	4.8397e-05	195.437	58.8193		0.483916	0	7621	0.0022944	0.000143535	-59.658	-307.887		0.483916	0	7621	0.00398544	0.000147023
0.312397	0	7624	0.0459227	-0.00026885	965.856	-653.149						0.312397	0	7624	0.140261	0.00728388	8118.94	-5274.71		0.312397	0	7624	0.000824979	8.66974e-05	-77.6792	2.6294			0.312397	0	7624	0.00265182	-1.13264e-05	-6.28569	167.436		0.312397	0	7624	0.00517283	-0.000515666	461.387	-145.678		0.312397	0	7624	0.0037184	0.000191078
0.353161	0	7629	0.00616619	-0.000258862	418.199	-536.12						0.353161	0	7629	1.98232	0.614815	-76230.5	-218318		0.353161	0	7629	0.00139163	6.20293e-06	256.509	-13.9686			0.353161	0	7629	0.0041045	-0.000293032	-70.5513	1023.71		0.353161	0	7629	0.0196718	0.00325896	-17907.2	2376.17		0.353161	0	7629	0.034096	0.00717291
0.405058	0	7633	0.00137923	-0.000591536	782.856	-650.372						0.405058	0	7633	0.00405944	-0.000974134	1050.94	-92.382		0.405058	0	7633	0.000770739	1.00156e-05	242.453	45.3121			0.405058	0	7633	0.00113566	1.36428e-05	-199.439	-246.623		0.405058	0	7633	0.00700116	-0.000289255	250.961	445.39		0.405058	0	7633	0.00574204	-0.00035856
0.403342	0	7639	0.0742887	-0.00311965	567.429	-7535.36						0.403342	0	7639	0.181394	0.0406576	-35424.9	27781.7		0.403342	0	7639	0.000911112	7.57919e-05	284.256	-386.338			0.403342	0	7639	0.00414175	0.000340382	-271.196	-292.547		0.403342	0	7639	0.0106976	-0.00076975	-2567.54	406.405		0.403342	0	7639	0.00301231	0.00553273
0.475973	0	7645	0.08927	-0.000398532	88.7048	890.574						0.475973	0	7645	0.833942	-0.309133	54469.4	-28979.3		0.475973	0	7645	0.00174581	4.94738e-05	-119.755	267.908			0.475973	0	7645	0.00412256	5.84488e-05	-417.154	-835.397		0.475973	0	7645	0.0213228	0.00436568	1977.22	-5095.79		0.475973	0	7645	0.0117007	-2.0263e-05
0.322341	0	7667	0.0143671	0.00187772	-410.918	-3092.15						0.322341	0	7667	3.1814	2.99313	0	-5924.08		0.322341	0	7667	0.00168889	8.65805e-07	-694.605	155.965			0.322341	0	7667	0.00666875	0.00087301	447.018	-581.653		0.322341	0	7667	0.0187343	0.00175699	-2186.27	5210.44		0.322341	0	7667	0.0163594	-0.00417117
0.447246	0	7676	0.102908	-0.00108879	-528.242	-964.669						0.447246	0	7676	1.09164	-1.22152	210559	-15264.9		0.447246	0	7676	0.00209511	8.7832e-05	-309.492	134.642			0.447246	0	7676	0.0131196	0.000593631	1062.61	-685.873		0.447246	0	7676	0.00555267	0.000427056	-2824.99	466.986		0.447246	0	7676	0.00695945	-0.000101058
0.487902	0	7677	0.0194253	-0.000707113	844.377	3504.78						0.487902	0	7677	1.35635	-0.339469	0	-13572.4		0.487902	0	7677	0.00163664	-0.000743444	-46.3084	1589.89			0.487902	0	7677	0.0921459	-0.0279412	-81865.9	14352.9		0.487902	0	7677	0.0288338	0.0503096	99347.1	127124		0.487902	0	7677	0.524324	-0.00875544
0.37032	0	7683	0.104449	0.000418643	-80.7674	-2940.42						0.37032	0	7683	1.56756	0.0691924	26470.4	-79597.6		0.37032	0	7683	0.00299624	0.000542956	586.351	-917.515			0.37032	0	7683	0.00703303	-0.00292342	-673.678	-806.961		0.37032	0	7683	0.00784764	-0.00203368	-2124.65	-928.648		0.37032	0	7683	0.0124236	0.00317049
0.332429	0	7684	0.0487927	0.00164956	338.1	1719.96						0.332429	0	7684	0.128253	-0.032935	-30685.8	27743.7		0.332429	0	7684	0.00197323	-0.0175748	5441.31	-2001.14			0.332429	0	7684	0.00221013	-0.0273912	-5225.59	4351.26		0.332429	0	7684	0.00359455	-0.024035	5276.98	-1088.3		0.332429	0	7684	0.00392156	-0.00815021
0.433414	0	7686	0.0351255	0.00628486	830.599	-297.875						0.433414	0	7686	0.0172941	-0.00335369	-29583.6	21165.6		0.433414	0	7686	0.00052606	-3.49395e-05	110.284	-254.449			0.433414	0	7686	0.00242337	0.00012154	-244.96	1080.16		0.433414	0	7686	0.00537992	4.96476e-05	-312.279	-685.348		0.433414	0	7686	0.0100865	-0.000781892
0.396789	0	7700	0.0436993	0.000358068	-374.529	-142.149						0.396789	0	7700	0.0588384	0.0104902	-6860.18	8954.94		0.396789	0	7700	0.000720111	-0.00012505	-98.9452	299.739			0.396789	0	7700	0.00104767	0.000170035	182.373	30.5301		0.396789	0	7700	0.00957576	0.000716542	791.331	-2043.6		0.396789	0	7700	0.000936854	-0.000144575
0.368972	0	7720	0.0750399	-0.00126579	-769.489	-759.743						0.368972	0	7720	0.0960119	0.235764	79511.8	14909.1		0.368972	0	7720	0.00154252	0.000208125	-237.538	86.3988			0.368972	0	7720	0.0025757	-0.000177569	-34.1306	190.705		0.368972	0	7720	0.0102742	0.000903823	1063.12	-2072.43		0.368972	0	7720	0.0149047	-0.00176166
0.353926	0	7722	0.10746	0.00265903	136.064	-1105.66						0.353926	0	7722	0.796073	0.25754	55370.6	114518		0.353926	0	7722	0.00152874	-0.000306193	391.584	265.731			0.353926	0	7722	0.00490552	0.000788535	-375.977	-733.788		0.353926	0	7722	0.0125662	0.00212852	3615.97	-2213.56		0.353926	0	7722	0.0116213	-0.00358113
0.363846	0	7724	0.00743598	-0.000799357	-1637.36	3372.13						0.363846	0	7724	0.0131304	0.00534546	2551.74	-3172.11		0.363846	0	7724	0.000107078	0.00662283	-968.874	2288.31			0.363846	0	7724	0.000547567	-0.000202797	1635.24	-2854.06		0.363846	0	7724	0.00357607	-0.00739276	-210.327	1123.61		0.363846	0	7724	0.00365365	0.00539923
0.496407	0	7728	0.0873392	-0.00158066	1468.12	4519.15						0.496407	0	7728	1.61046	-0.478832	26883.8	229338		0.496407	0	7728	0.000766277	-0.000330673	445.449	171.879			0.496407	0	7728	0.00595414	-0.000790951	720.191	1100.92		0.496407	0	7728	0.00657005	0.00168185	-1219.9	-4948.65		0.496407	0	7728	0.0126053	0.00110708
0.375609	0	7730	0.111215	-0.00019381	242.358	-1038.48						0.375609	0	7730	0.102848	0.0308553	67391.1	20835		0.375609	0	7730	0.000185258	-1.28119e-05	-28.2959	17.7613			0.375609	0	7730	0.0040744	0.000139317	-221.041	-461.147		0.375609	0	7730	0.00439157	0.0001275	-203.158	-2249.69		0.375609	0	7730	0.00401202	-0.00209464
0.431628	0	7750	0.0153795	-0.00179728	341.28	-488.484						0.431628	0	7750	0.0340452	-0.0102102	-22699.6	-5075.21		0.431628	0	7750	0.000769995	-3.08151e-05	-86.29	-8.14949			0.431628	0	7750	0.000182071	-7.04418e-05	-2.07438	-35.6616		0.431628	0	7750	0.0013714	0.000226527	920.94	-399.797		0.431628	0	7750	0.0024309	8.11089e-05
0.310732	0	7753	0.0205416	5.48827e-06	708.008	-289.497						0.310732	0	7753	1.31565	-0.606802	-114150	-56900.9		0.310732	0	7753	0.000693429	-4.02269e-06	87.3783	5.75539			0.310732	0	7753	0.00357568	2.44786e-05	396.689	-205.048		0.310732	0	7753	0.0108211	-0.00159695	-37.6102	291.466		0.310732	0	7753	0.0212795	0.00234972
0.450062	0	7755	0.0225379	-0.000598134	2001.25	-483.578						0.450062	0	7755	0.0162839	0.000654817	2079.71	-2302.64		0.450062	0	7755	0.000486974	-4.51575e-05	-77.0031	-232.61			0.450062	0	7755	0.0027415	0.000217148	-154.519	-413.356		0.450062	0	7755	0.0072488	0.000494451	-98.0692	384.568		0.450062	0	7755	0.00187628	0.000175423
0.42436	0	7759	0.0714293	0.00195044	912.322	-3240.32						0.42436	0	7759	0.0358051	-0.0128083	63221.8	16990.3		0.42436	0	7759	0.00237689	0.000120028	62.1108	-476			0.42436	0	7759	0.00426139	0.000501591	-359.937	-469.46		0.42436	0	7759	0.00864941	0.00479372	1415.4	-3410.06		0.42436	0	7759	0.0121061	0.0048152
0.337797	0	7766	0.0788026	-0.000759957	-990.461	-1668.63						0.337797	0	7766	0.202932	-0.0180584	0	-6505.83		0.337797	0	7766	0.000769529	-4.97779e-05	408.053	-64.6395			0.337797	0	7766	0.00560994	0.000688298	-145.767	-311.449		0.337797	0	7766	0.00692913	0.000162257	-1300.25	-1384.78		0.337797	0	7766	0.00372161	0.00175689
0.301093	0	7769	0.00897251	-0.000161472	-113.212	121.757						0.301093	0	7769	0.0158381	0.000957203	-127.03	-430.443		0.301093	0	7769	0.00134557	1.66658e-05	64.7585	117.917			0.301093	0	7769	0.00162982	0.000139247	-208.64	-143.435		0.301093	0	7769	0.00456587	-0.000199122	-455.329	85.1627		0.301093	0	7769	0.00317307	0.000285976
0.329448	0	7770	0.0290987	-0.000888357	-534.529	862.838						0.329448	0	7770	2.0455	-0.0574897	-119340	-26576		0.329448	0	7770	0.00270553	8.20295e-05	-327.545	-36.4952			0.329448	0	7770	0.0496013	0.00102577	-1676.35	4536.09		0.329448	0	7770	0.102823	-0.0964579	123560	79924.5		0.329448	0	7770	0.203837	-0.40358
0.393431	0	7775	0.060913	0.00232067	837.847	-4041						0.393431	0	7775	0.0491086	0.0479174	-24195.8	2211.92		0.393431	0	7775	0.0034697	-0.000173865	176.891	123.32			0.393431	0	7775	0.00361826	0.000470788	377.949	178.87		0.393431	0	7775	0.0154871	-0.000700398	-1984.98	323.99		0.393431	0	7775	0.0144197	0.0018236
0.370368	0	7781	0.0259624	-0.0010024	460.834	-2265.76						0.370368	0	7781	0.0211668	0.0015507	-87.2445	319.214		0.370368	0	7781	0.000595526	-7.41498e-05	-87.5774	-126.689			0.370368	0	7781	0.00452136	0.000178357	87.7237	-279.318		0.370368	0	7781	0.00967828	0.000184429	1.96815	327.78		0.370368	0	7781	0.00191077	2.46779e-05
0.388351	0	7803	0.00869616	0.000880566	-747.879	4384.18						0.388351	0	7803	0.0253722	0.00696835	-18559	8985.76		0.388351	0	7803	0.00103278	9.41907e-05	65.1289	-131.991			0.388351	0	7803	0.00141931	-3.4525e-05	-172.302	-9.22546		0.388351	0	7803	0.0028316	0.000118576	-5.54817	450.229		0.388351	0	7803	0.00326226	-6.18984e-05
0.328074	0	7806	0.100084	-0.00175291	732.489	943.226						0.328074	0	7806	1.38961	-0.855564	91391.4	-125744		0.328074	0	7806	0.00180108	8.46509e-05	-290.614	82.3597			0.328074	0	7806	0.00421641	-0.000714872	389.084	-514.481		0.328074	0	7806	0.00755186	0.00527776	998.722	2456.59		0.328074	0	7806	0.0268126	-0.00563505
0.366817	0	7815	0.059031	-0.00761307	-221.517	-4911.3						0.366817	0	7815	0.00581795	0.000748954	34844.5	-9832.82		0.366817	0	7815	0.00116629	-0.000151641	123.573	198.801			0.366817	0	7815	0.00176193	-0.000124159	-46.0224	-8.25486		0.366817	0	7815	0.00384676	-0.00127303	1154.85	501.467		0.366817	0	7815	0.000345979	-0.0121438
0.328836	0	7851	0.00730971	-0.00340496	362.385	-1143.95						0.328836	0	7851	0.00501533	-0.0010598	-2062.14	821.669		0.328836	0	7851	0.000176168	9.03041e-06	8.78113	12.5422			0.328836	0	7851	0.000669263	8.22146e-05	-7.20089	32.205		0.328836	0	7851	0.00201166	7.09055e-05	-122.852	-9.30765		0.328836	0	7851	0.00125639	4.0844e-05
0.40284	0	7855	0.0697998	-0.00191828	-450.355	-540.892						0.40284	0	7855	0.0916462	-0.145103	117015	45410.3		0.40284	0	7855	0.00258127	0.000227025	84.5317	-194.317			0.40284	0	7855	0.0050567	-0.000377868	1059.29	424.701		0.40284	0	7855	0.0173864	0.00118176	1442.68	839.947		0.40284	0	7855	0.00766729	-0.000694659
0.492979	0	7858	0.0642713	0.000813651	-507.339	-1522						0.492979	0	7858	0.0522024	-0.000564473	-16125.4	-17581.9		0.492979	0	7858	0.00100785	0.000218503	-147.19	-100.376			0.492979	0	7858	0.00350859	-0.000231319	287.043	515.814		0.492979	0	7858	0.0138632	0.00106513	3227.09	-4141.65		0.492979	0	7858	0.0115391	8.81241e-05
0.367214	0	7859	0.0173553	0.00151738	458.482	-4225.21						0.367214	0	7859	3.80644	-0.164905	-17129.1	85062.6		0.367214	0	7859	0.00380188	-8.77455e-05	-469.669	299.403			0.367214	0	7859	0.0079126	0.00123942	-1398.84	-1201.75		0.367214	0	7859	0.00983558	-0.018379	19028.6	7383.42		0.367214	0	7859	0.0271189	0.000948993
0.375208	0	7870	0.0676305	-0.00599872	-884.172	-5914.35						0.375208	0	7870	0.176489	0.102165	-78558.3	-24044.7		0.375208	0	7870	0.00311686	0.000183666	-111.045	-95.1239			0.375208	0	7870	0.00528993	0.000906325	-191.562	421.806		0.375208	0	7870	0.018777	-0.00317794	-3558.34	-1484.06		0.375208	0	7870	0.0146817	0.0137289
0.399302	0	7878	0.0274976	0.000618933	234.661	-4015.1						0.399302	0	7878	3.05704	-0.482336	0	-9090.64		0.399302	0	7878	0.00264762	0.000377517	1057.83	-645.454			0.399302	0	7878	0.0228451	0.000538707	2746.94	5424.99		0.399302	0	7878	0.00548096	-0.108417	-14181.1	66842.8		0.399302	0	7878	0.241314	-0.379984
0.326952	0	7884	0.0231995	0.000954394	-810.767	-2690.35						0.326952	0	7884	4.11282	-0.0552762	279505	-59017.1		0.326952	0	7884	0.00376663	0.000238689	-264.933	22.2636			0.326952	0	7884	0.00520831	-0.000324064	28.9171	-60.4326		0.326952	0	7884	0.00539958	-0.00873359	15353.5	-13006.1		0.326952	0	7884	0.0284169	-0.0359913
0.340568	0	7887	0.0331119	0.000811493	1159.5	4428.73						0.340568	0	7887	0.0368475	-0.00701969	22036.2	9782.27		0.340568	0	7887	0.00014545	6.06935e-06	76.5746	-4.1			0.340568	0	7887	0.00253559	-0.000248341	291.239	-7.44016		0.340568	0	7887	0.00444446	0.000165756	97.2657	-532.354		0.340568	0	7887	0.00758298	-0.000756502
0.441318	0	7893	0.0612638	-0.00152273	-325.037	-869.691						0.441318	0	7893	0.134093	-0.016178	76984.7	-103256		0.441318	0	7893	0.00194543	0.000491504	-486.027	605.805			0.441318	0	7893	0.00297269	0.000678474	1748.14	-1375.06		0.441318	0	7893	0.00586321	-0.00077928	1511.15	333.058		0.441318	0	7893	0.00965208	-9.10546e-05
0.377442	0	7906	0.0102821	0.000313322	-1379.62	-506.134						0.377442	0	7906	0.891782	-4.7865	207097	301728		0.377442	0	7906	0.00109721	0.000173307	-253.898	45.4904			0.377442	0	7906	0.00725801	-0.00111693	-1549.74	1354.5		0.377442	0	7906	0.0169993	-0.0067715	5803.36	8974.92		0.377442	0	7906	0.0115116	0.00479312
0.480992	0	7912	0.0578253	-9.01706e-05	650.998	-1265.72						0.480992	0	7912	0.0411643	-0.0252037	38802.6	-433.751		0.480992	0	7912	0.00155673	-5.58847e-05	229.231	-248.286			0.480992	0	7912	0.00593852	-0.000324521	272.119	909.094		0.480992	0	7912	0.0157409	-0.000646903	1702.43	-2075.78		0.480992	0	7912	0.0147168	0.00111035
0.399203	0	7925	0.0410914	-0.00231314	495.525	2214.21						0.399203	0	7925	3.9111	0.551237	25260.6	151970		0.399203	0	7925	0.00154626	-0.000219475	46.0994	150.452			0.399203	0	7925	0.00885789	0.000533839	370.027	-1525.85		0.399203	0	7925	0.0163529	-0.0107987	-7940.38	-3227.85		0.399203	0	7925	0.308629	-0.105067
0.328629	0	7933	0.0973766	-0.00119296	-1067.91	-1665.66						0.328629	0	7933	0.537969	0.607273	3729.08	-17350.3		0.328629	0	7933	0.00289814	-0.000148606	151.238	6.93766			0.328629	0	7933	0.00807943	-0.000928216	-355.18	243.802		0.328629	0	7933	0.00652577	0.00165026	-2205.95	-596.527		0.328629	0	7933	0.00921294	0.00203702
0.474466	0	7935	0.0241491	-0.00439688	1203.3	7558.44						0.474466	0	7935	3.57292	-1.50343	91626.9	-183849		0.474466	0	7935	0.00158367	9.78525e-05	-616.205	120.237			0.474466	0	7935	0.00992081	0.000881796	-5164.65	-2178.4		0.474466	0	7935	0.0124331	-0.0021838	-7923.89	-10860.4		0.474466	0	7935	0.0361203	0.0246295
0.465455	0	7937	0.0761388	-0.000632581	-1205.48	-11026.6						0.465455	0	7937	0.963879	-0.871387	-166319	210171		0.465455	0	7937	0.0029754	-3.47362e-05	-388.026	33.6172			0.465455	0	7937	0.00709967	0.000897025	-1640.35	240.976		0.465455	0	7937	0.0199584	0.00576568	15692.5	-948.584		0.465455	0	7937	0.0267086	-0.00331914
0.415081	0	7938	0.0988716	-7.79444e-05	-860.729	-4483.87						0.415081	0	7938	0.118233	0.769495	-14874.1	29295.5		0.415081	0	7938	0.000896563	0.000105692	-611.816	-153.017			0.415081	0	7938	0.00289224	-0.000178062	749.481	1022.59		0.415081	0	7938	0.00309246	-0.000465313	-1032.91	-1055.84		0.415081	0	7938	0.0109465	-0.00179748
0.311158	0	7943	0.0723489	0.000411322	-483.735	-1205.8						0.311158	0	7943	0.0924742	-0.0400186	-31612	48797.8		0.311158	0	7943	0.00137068	6.47033e-05	252.685	-146			0.311158	0	7943	0.00662408	0.000164221	560.979	161.335		0.311158	0	7943	0.00468785	-0.000684012	-695.103	-280.098		0.311158	0	7943	0.00535993	0.00010018
0.45265	0	7946	0.0401728	-0.00102514	149.071	-1254.99						0.45265	0	7946	3.84043	-0.260882	0	-11682		0.45265	0	7946	0.00109419	-7.25571e-05	714.204	-1.35592			0.45265	0	7946	0.00281287	0.000132324	1674.6	-1338.53		0.45265	0	7946	0.0109361	-0.00204965	7064.03	-4289.8		0.45265	0	7946	0.0335471	0.0078487
0.315089	0	7949	0.0257209	0.00913952	-224.146	475.126						0.315089	0	7949	1.76239	-0.287604	58371.6	-115.564		0.315089	0	7949	1.003	-3.52895	-7057.9	-23893.3			0.315089	0	7949	10.3714	4.35161	0	-5660.54		0.315089	0	7949	5.82749	-4.41754	0	-5660.54		0.315089	0	7949	0.314801	0.119075
0.368452	0	7957	0.12127	-0.00145005	-2445.26	-4832.11						0.368452	0	7957	0.930199	-2.901	0	-7740.21		0.368452	0	7957	0.00145528	0.000803766	-107.876	13.8074			0.368452	0	7957	0.00185205	0.00143961	842.583	-1144.74		0.368452	0	7957	0.0203603	-0.000402601	4742.86	-4644.1		0.368452	0	7957	0.00476161	-0.000883729
0.3384	0	7981	0.0202322	-0.00084531	-106.46	-1428.81						0.3384	0	7981	1.5669	0.515776	134873	15640.5		0.3384	0	7981	0.00270545	-0.000325175	46.2814	596.921			0.3384	0	7981	0.252005	-0.580081	-57652.7	71544		0.3384	0	7981	2.17454	3.90389	-66145.7	-22546.2		0.3384	0	7981	2.3647	1.71913
0.300941	0	7991	0.0228892	-0.00746996	52.4715	-55.7826						0.300941	0	7991	0.0950831	-0.00273231	-9358.73	-32862.5		0.300941	0	7991	0.000524719	-6.61623e-05	-72.7131	14.8497			0.300941	0	7991	0.0012646	0.000150271	51.6258	-0.0793985		0.300941	0	7991	0.00611839	-0.000987759	73.27	414.062		0.300941	0	7991	0.0145771	-0.00307912
0.464959	0	7992	0.0395772	0.00253925	-4202.05	4380.26						0.464959	0	7992	0.0110274	-0.000392873	3529.68	680.717		0.464959	0	7992	0.00192748	-1.1614e-05	-215.218	-237.893			0.464959	0	7992	0.00243949	-8.85075e-05	-987.492	-969.868		0.464959	0	7992	0.00604853	-3.10558e-05	-1695.37	734.878		0.464959	0	7992	0.00384986	0.000156346
0.460264	0	8008	0.0849814	0.000809886	1087.92	-2135.3						0.460264	0	8008	1.24104	0.305978	31101.2	-176206		0.460264	0	8008	0.00200112	7.41155e-05	-605.07	472.496			0.460264	0	8008	0.00975174	0.000402901	882.137	-1212.22		0.460264	0	8008	0.0107836	-0.00350942	-226.905	-1962.86		0.460264	0	8008	0.00746838	-0.000660991
0.353972	0	8043	0.118474	0.00167531	-337.114	-6131.47						0.353972	0	8043	0.373333	-1.88174	0	-7143.8		0.353972	0	8043	0.00108786	-0.000131666	-39.4374	26.4769			0.353972	0	8043	0.00436216	-0.000503055	-40.2479	892.561		0.353972	0	8043	0.00637755	-0.00125064	344.66	2730.64		0.353972	0	8043	0.0289855	-0.00119083
0.485198	0	8048	0.0364685	0.00134826	-1415.21	10047.8						0.485198	0	8048	1.02804	-0.983	89008.1	-41864.1		0.485198	0	8048	0.000554747	-1.08208e-05	1.23407	31.1128			0.485198	0	8048	0.00418675	-1.03893e-05	739.122	-587.93		0.485198	0	8048	0.00388201	0.000228278	1579.05	305.229		0.485198	0	8048	0.0126349	-0.000473603
0.411976	0	8049	0.0533823	0.00277309	441.493	-642.06						0.411976	0	8049	0.0441767	0.0134169	46232.1	-28022.5		0.411976	0	8049	0.00129547	-0.000362638	-49.0794	-355.054			0.411976	0	8049	0.00228692	0.00030563	-254.693	346.935		0.411976	0	8049	0.00623413	-0.000210229	4453.84	-1616.01		0.411976	0	8049	0.00960392	0.00539304
0.342325	0	8050	0.044977	-0.000405	-454.754	-556.935						0.342325	0	8050	1.71977	-1.69654	75115.5	-13474.6		0.342325	0	8050	0.00140793	-0.000167705	438.332	-60.7191			0.342325	0	8050	0.00300254	-8.92113e-05	519.508	-1288.47		0.342325	0	8050	0.00881676	-0.00132839	-61.636	-1079.97		0.342325	0	8050	0.024629	-0.0268586
0.398862	0	8052	0.0219261	0.00211088	-1303.58	-1079.59						0.398862	0	8052	0.069595	-0.00331219	-22948.5	1853.34		0.398862	0	8052	0.00114343	-6.14039e-05	-23.0215	113.057			0.398862	0	8052	0.00193119	-0.000247939	-145.764	336.832		0.398862	0	8052	0.00645059	0.000123426	398.195	201.889		0.398862	0	8052	0.0125721	0.0018559
0.44372	0	8061	0.0223579	-0.00410014	308.064	2674.59						0.44372	0	8061	0.044011	0.0119209	36216.6	11020.6		0.44372	0	8061	0.000395663	3.15378e-06	52.9695	2.47104			0.44372	0	8061	0.00161378	-8.86251e-05	193.047	120.041		0.44372	0	8061	0.000560571	-5.20293e-05	689.51	444.564		0.44372	0	8061	0.00124198	0.000183467
0.48983	0	8068	0.0093239	-0.00510948	441.936	-111.855						0.48983	0	8068	0.00449872	-0.0128603	-30573.8	-11063.4		0.48983	0	8068	0.000242127	-8.99701e-05	-18.9432	15.5004			0.48983	0	8068	0.000559838	0.000211277	123.06	59.0172		0.48983	0	8068	0.00108106	-0.000482379	243.248	-125.114		0.48983	0	8068	0.00638939	-0.000721385
0.319169	0	8069	0.0313624	0.000583392	166.334	-3010.15						0.319169	0	8069	1.91015	0.71684	0	-5808.06		0.319169	0	8069	0.00374282	0.00038028	346.581	-596.937			0.319169	0	8069	0.0236666	0.000406667	989.447	-423.294		0.319169	0	8069	1.33601	-0.861204	-111246	25760		0.319169	0	8069	0.61958	-0.899085
0.413449	0	8073	0.0494343	-0.00182041	-1124.04	-860.299						0.413449	0	8073	0.0530831	-0.00716287	-29966.9	5580.71		0.413449	0	8073	0.00139585	-4.23509e-05	-227.704	108.057			0.413449	0	8073	0.00110013	-0.000366424	-553.109	455.506		0.413449	0	8073	0.0120262	-0.000164903	4.8184	540.133		0.413449	0	8073	0.0120928	0.0010348
0.422522	0	8076	0.044516	0.00212426	115.944	408.027						0.422522	0	8076	0.0638897	-0.00267534	6339.42	-21227.1		0.422522	0	8076	0.00113391	-0.000185079	-5.77104	50.612			0.422522	0	8076	0.00194641	0.000288005	-578.164	267.88		0.422522	0	8076	0.00843446	0.000262336	-332.427	-1573.55		0.422522	0	8076	0.0126695	6.2072e-05
0.479675	0	8078	0.10151	-0.00183477	1978.64	-1123.3						0.479675	0	8078	0.972246	-0.153155	-169660	169720		0.479675	0	8078	0.00277416	0.000436064	-64.0315	-410.621			0.479675	0	8078	0.0125343	0.000303448	-647.157	677.409		0.479675	0	8078	0.020821	-0.000525742	1139.02	-2124.98		0.479675	0	8078	0.0135584	0.00205689
0.303802	0	8085	0.0354739	-0.00273603	-1217.97	-853.778						0.303802	0	8085	0.0509663	-0.0136586	-3482.49	-5701.36		0.303802	0	8085	0.00156427	-8.13477e-05	50.8473	14.3128			0.303802	0	8085	0.00369663	-0.000369193	-102.08	59.9781		0.303802	0	8085	0.00979709	-0.000270175	169.977	19.4753		0.303802	0	8085	0.00153296	0.000900217
0.434464	0	8092	0.0239056	-0.0168641	-144.836	207.246						0.434464	0	8092	3.02865	-0.1665	495203	232251		0.434464	0	8092	0.0605008	0.0975655	-35550.4	17054			0.434464	0	8092	0.606014	1.02753	-2453.16	2933		0.434464	0	8092	8.79788	6.03322	0	-10762.1		0.434464	0	8092	2.28302	-1.27483
0.457671	0	8103	0.034841	1.62807e-05	188.913	-737.307						0.457671	0	8103	0.0296669	0.0157568	46459.8	-32320.3		0.457671	0	8103	0.00182817	-4.2317e-05	184.187	-43.0222			0.457671	0	8103	0.00254757	7.84639e-05	176.078	-275.369		0.457671	0	8103	0.00754594	0.000416068	1471.19	320.647		0.457671	0	8103	0.00693324	0.00129453
0.340213	0	8121	0.0701702	-0.00125568	1024.27	-445.476						0.340213	0	8121	0.0966953	-0.0167887	-92366.2	74952.9		0.340213	0	8121	0.00084738	3.93691e-05	-192.27	-115.222			0.340213	0	8121	0.00247727	0.000230231	-22.5115	77.6372		0.340213	0	8121	0.00758729	-0.000535124	-93.1231	-415.578		0.340213	0	8121	0.00360391	0.00115327
0.407047	0	8146	0.0805307	0.00170443	728.981	-451.807						0.407047	0	8146	0.132669	-0.0327629	19553.6	67349		0.407047	0	8146	0.00395204	5.18482e-05	41.3867	-75.0466			0.407047	0	8146	0.00426558	-0.000592107	96.2515	-22.1805		0.407047	0	8146	0.0159371	-0.00138812	-3002.8	-611.27		0.407047	0	8146	0.00513892	-1.59099e-05
0.35794	0	8150	0.0388538	0.000750917	1687.95	-2719.66						0.35794	0	8150	0.0307901	-0.005268	3153.01	-950.252		0.35794	0	8150	0.00155798	-7.39757e-05	144.075	-172.34			0.35794	0	8150	0.00734263	-0.000233124	-30.0435	-41.0808		0.35794	0	8150	0.0111149	0.00091226	-95.7722	-1116.16		0.35794	0	8150	0.00522755	0.000665099
0.495411	0	8159	0.042598	0.00322037	-655.625	-10295.4						0.495411	0	8159	0.0317051	0.00287422	-45112.3	-57769.4		0.495411	0	8159	0.00127632	-0.0001152	-3.50177	-97.7994			0.495411	0	8159	0.00305508	-0.000206814	154.036	491.18		0.495411	0	8159	0.000960162	-0.000723533	-310.656	1128.21		0.495411	0	8159	0.00297324	-0.00222082
0.347959	0	8163	0.0838704	0.000519034	152.896	35.2865						0.347959	0	8163	0.0544508	-0.00406761	-6885.81	-24271.8		0.347959	0	8163	0.000373237	-8.68306e-05	-72.5011	-146.339			0.347959	0	8163	0.00272062	-0.000132769	298.249	129.027		0.347959	0	8163	0.00531046	0.00163042	490.112	-2336.65		0.347959	0	8163	0.00602725	-7.53932e-06
0.330433	0	8176	0.00942208	0.00022017	-769.931	3847.87						0.330433	0	8176	0.0344791	-0.00184044	6665.89	4231.72		0.330433	0	8176	0.000832349	7.575e-05	30.5	-51.4931			0.330433	0	8176	0.00157896	-3.61356e-05	-84.3775	-9.31834		0.330433	0	8176	0.0027732	-1.75245e-05	-481.33	169.072		0.330433	0	8176	0.00170046	-4.26037e-05
0.429562	0	8184	0.014494	-0.00149659	110.896	760.634						0.429562	0	8184	0.0241674	-0.0297359	-9944.82	-3365.1		0.429562	0	8184	0.00023019	-6.44149e-05	-25.7471	40.1918			0.429562	0	8184	0.00127128	-0.000237116	-88.0324	114.142		0.429562	0	8184	0.0020658	0.000512357	397.894	226.849		0.429562	0	8184	0.000947716	-0.000539839
0.393136	0	8199	0.0399788	0.000343009	1297.14	1176.12						0.393136	0	8199	0.0593064	0.00641475	-17057	-12361.3		0.393136	0	8199	0.000364556	1.74793e-05	-75.4822	75.2527			0.393136	0	8199	0.00245396	5.39142e-05	-175.001	-398.785		0.393136	0	8199	0.00597467	-0.000133735	-1461.12	-913.898		0.393136	0	8199	0.0091046	-8.39026e-05
0.440188	0	8208	0.0245612	-0.000103159	1091.66	-5307.86						0.440188	0	8208	0.0299766	0.00199945	-4334.54	-1184.55		0.440188	0	8208	0.000862085	9.35847e-05	123.697	-242.359			0.440188	0	8208	0.00573945	-1.16989e-06	379.574	497.603		0.440188	0	8208	0.00894382	-8.29668e-05	-1066.95	-76.6132		0.440188	0	8208	0.00214155	-1.53328e-05
0.363033	0	8217	0.0466656	-0.00287241	-779.595	-342.052						0.363033	0	8217	0.123582	-0.0183703	33024.1	35198.2		0.363033	0	8217	0.000427097	-2.3281e-05	-162.177	7.43338			0.363033	0	8217	0.00203181	-4.86802e-06	-619.566	388.133		0.363033	0	8217	0.0133767	-0.000308113	-764.242	696.575		0.363033	0	8217	0.0133674	0.00152826
0.400063	0	8218	0.0326605	-0.000808761	-398.693	-79.6076						0.400063	0	8218	1.23877	-0.129167	272334	-84779.9		0.400063	0	8218	0.11544	-0.067011	23438	16847.2			0.400063	0	8218	1.15214	-4.18001	0	-9125.31		0.400063	0	8218	2.04871	-2.40694	0	-9125.31		0.400063	0	8218	1.68149	-4.09755
0.378557	0	8220	0.0630831	-0.000565381	-1357.22	-1016						0.378557	0	8220	0.0685141	-0.0626585	-88484.1	29947.3		0.378557	0	8220	0.00297916	-0.0166208	1239.89	4714.06			0.378557	0	8220	0.00149435	0.0176342	-1845.12	-7345.25		0.378557	0	8220	0.00121215	-0.00214244	-4643.12	550.04		0.378557	0	8220	0.00432888	0.000917683
0.333565	0	8226	0.0291044	-0.00176219	397.416	-231.48						0.333565	0	8226	0.119068	-0.010466	-6293.68	5486.94		0.333565	0	8226	0.000702815	1.77518e-06	154.11	53.8729			0.333565	0	8226	0.00466821	0.000187746	70.9144	-358.369		0.333565	0	8226	0.0109018	-0.00159542	1243.06	341.605		0.333565	0	8226	0.00732097	-0.00170237
0.402033	0	8227	0.0358935	0.000152679	139.606	-391.574						0.402033	0	8227	0.0153969	0.000150067	1018.24	-651.795		0.402033	0	8227	0.000851759	-6.19823e-05	-85.9712	-257.585			0.402033	0	8227	0.0037338	0.000150737	-435.54	-557.424		0.402033	0	8227	0.0100506	0.000148823	-332.137	517.803		0.402033	0	8227	0.0032338	2.79156e-05
0.430934	0	8232	0.078942	0.000266286	-1016.46	-297.159						0.430934	0	8232	0.145934	-0.0565191	-74922.1	-57276.6		0.430934	0	8232	0.000131018	2.38899e-05	447.944	-259.998			0.430934	0	8232	0.00118656	-0.000546698	-141.957	232.72		0.430934	0	8232	0.0149113	0.00319496	-1799.64	581.486		0.430934	0	8232	0.00446541	-0.000442988
0.431577	0	8233	0.0310975	0.000156231	1294.29	-947.003						0.431577	0	8233	0.0317995	-0.000867983	2299.95	-26788.4		0.431577	0	8233	0.000897465	3.63748e-05	-44.0441	-19.0171			0.431577	0	8233	0.00227319	0.000182405	381.16	-503.856		0.431577	0	8233	0.0061943	-0.000261453	600.843	1023.01		0.431577	0	8233	0.00409748	0.000335168
0.464709	0	8236	0.0083083	0.000849427	508.776	3066.48						0.464709	0	8236	0.0137729	-0.00647848	-4430.38	16584.4		0.464709	0	8236	0.000267026	-5.96757e-05	113.236	22.3507			0.464709	0	8236	0.000189067	0.000116792	19.9166	-38.7255		0.464709	0	8236	0.0015076	0.000128092	616.892	122.472		0.464709	0	8236	0.00149264	0.000116373
0.347305	0	8237	0.0265509	-0.00162215	-129.994	-2566.07						0.347305	0	8237	0.0169569	0.0016547	619.236	180.655		0.347305	0	8237	0.00072337	-9.61878e-05	-69.1812	-61.8675			0.347305	0	8237	0.00534984	0.000211167	145.773	-226.543		0.347305	0	8237	0.0108631	0.000193648	-43.1168	316.919		0.347305	0	8237	0.00198088	-0.000163877
0.387355	0	8239	0.0660714	-0.00568822	-507.64	-2976.44						0.387355	0	8239	0.375058	0.960816	-93036.7	-41833		0.387355	0	8239	0.000827988	6.13276e-06	-98.2393	88.549			0.387355	0	8239	0.00228837	-0.000254132	-853.965	714.677		0.387355	0	8239	0.0180702	-0.00085273	-2428.1	39.9389		0.387355	0	8239	0.0135556	-0.00572685
0.36263	0	8244	0.0633473	0.000516691	-56.6507	419.602						0.36263	0	8244	0.0379985	-0.106582	-119363	22284.4		0.36263	0	8244	0.00152057	5.57287e-05	-1.12357	-21.9088			0.36263	0	8244	0.00533844	4.90948e-05	-208.303	278.857		0.36263	0	8244	0.00933791	0.000273195	-247.21	-1919.24		0.36263	0	8244	0.0129539	0.00058831
0.428219	0	8248	0.119887	-0.00094413	3618.73	343.729						0.428219	0	8248	0.732532	-0.536139	-75151	-142007		0.428219	0	8248	0.000881357	0.000431409	124.158	-1058.98			0.428219	0	8248	0.00500486	-0.000449336	-1275.61	-441.22		0.428219	0	8248	0.0386497	-0.179946	13709.8	-3054.56		0.428219	0	8248	0.0108016	0.00208342
0.445496	0	8250	0.0190899	0.000467709	-1825.03	7581.65						0.445496	0	8250	0.0351516	0.00267979	4227.21	8469.64		0.445496	0	8250	0.00189971	0.000229813	-102.748	-139.086			0.445496	0	8250	0.00429182	-0.0003875	495.759	-249.376		0.445496	0	8250	0.00110131	4.76911e-05	-570.085	-1116.35		0.445496	0	8250	0.00317161	-0.000212071
0.329928	0	8251	0.0274025	-0.00012531	-187.696	239.378						0.329928	0	8251	1.81869	0.521306	35997.3	193140		0.329928	0	8251	0.0248709	-0.0016282	-3523.82	5535.55			0.329928	0	8251	2.18352	5.68414	0	-6206.25		0.329928	0	8251	3.52969	1.53422	-5998.27	-24076.5		0.329928	0	8251	4.73425	3.04926
0.412587	0	8257	0.00332392	0.000127352	974.15	2799.97						0.412587	0	8257	3.3653	0.47716	133087	4433.93		0.412587	0	8257	0.00379138	-0.000327588	-336.862	208.733			0.412587	0	8257	0.0175832	-0.0203122	-22224.8	8739.85		0.412587	0	8257	0.0385365	-0.0165447	8780.87	-4573.01		0.412587	0	8257	0.0125422	0.00250584
0.445864	0	8261	0.0341995	0.0213235	-199.461	744.74						0.445864	0	8261	3.21225	-0.726009	0	-11334.3		0.445864	0	8261	0.0393318	-0.0627613	-25448.1	22505.1			0.445864	0	8261	0.588171	-1.28499	-667.276	-1169.73		0.445864	0	8261	8.01071	-10.4621	0	-11334.3		0.445864	0	8261	3.76733	1.33538
0.463794	0	8263	0.00350625	-0.000733096	0.378634	287.009						0.463794	0	8263	0.0173255	-0.0099623	97.8326	-5684.4		0.463794	0	8263	0.000778681	0.000109112	534.457	382.367			0.463794	0	8263	0.00270734	4.55949e-05	-700.549	-323.49		0.463794	0	8263	0.00861873	-7.26015e-05	-673.734	533.226		0.463794	0	8263	0.00696537	0.000605476
0.397733	0	8276	0.0596728	0.00074323	-516.622	416.851						0.397733	0	8276	0.0262242	0.0979413	-68286.1	26221.2		0.397733	0	8276	0.000804075	-0.000156493	192.591	197.931			0.397733	0	8276	0.00302442	-0.000146186	-22.1747	-753.086		0.397733	0	8276	0.0181566	0.000371232	-1155.5	2819.88		0.397733	0	8276	0.00753874	0.000521974
0.416086	0	8292	0.123289	-0.000804914	684.419	-897.665						0.416086	0	8292	0.482075	-0.476047	-4163.44	-19222.9		0.416086	0	8292	0.00242227	-0.000148912	279.076	-129.858			0.416086	0	8292	0.000760536	0.000712448	-326.039	-1403.1		0.416086	0	8292	0.00578294	0.000768067	-418.179	-1573.52		0.416086	0	8292	0.0072428	-0.00195426
0.347156	0	8296	0.0232391	-0.00105358	375.039	-2897.41						0.347156	0	8296	0.0255901	-0.000677603	-1906.46	-680.555		0.347156	0	8296	0.000714364	7.01411e-05	63.909	-130.118			0.347156	0	8296	0.00501235	0.000148746	187.06	288.033		0.347156	0	8296	0.00826084	3.26391e-06	-546.057	-17.5064		0.347156	0	8296	0.00234652	3.43335e-05
0.327418	0	8303	0.0252861	0.00367213	61.1474	-4050.86						0.327418	0	8303	0.0255859	0.0222627	6065.07	-17603.6		0.327418	0	8303	0.000943643	-0.000113458	96.6517	-159.734			0.327418	0	8303	0.00260365	-0.000179777	143.1	179.296		0.327418	0	8303	0.00238299	0.000723471	15.2545	-36.3705		0.327418	0	8303	0.00750554	0.000648919
0.488907	0	8309	0.0227119	0.000648813	-1699.67	-1078.35						0.488907	0	8309	4.30156	-0.0990267	-141707	-99307.5		0.488907	0	8309	0.00316123	-3.53909e-05	-424.931	412.619			0.488907	0	8309	0.0296021	-0.0115295	29392	-14753.2		0.488907	0	8309	0.0755093	0.00753314	-33274.1	-32298.5		0.488907	0	8309	0.134257	-0.0934006
0.335113	0	8319	0.103749	-0.00178444	286.686	-1896.3						0.335113	0	8319	0.2582	0.517466	96286.2	133660		0.335113	0	8319	0.0016906	7.37279e-05	41.8195	-33.5704			0.335113	0	8319	0.00139606	0.000184808	79.008	-98.1535		0.335113	0	8319	0.0167219	-0.000960316	-109.38	-910.221		0.335113	0	8319	0.00476883	-0.00160985
0.40695	0	8337	0.0422353	0.00140786	-765.761	7815.57						0.40695	0	8337	2.70495	4.4918	-33266.8	75805.8		0.40695	0	8337	0.00142621	4.91372e-05	-1.07551	216.504			0.40695	0	8337	0.00416812	-3.15403e-05	-168.696	41.832		0.40695	0	8337	0.00664249	-0.00025068	-101.16	-331.833		0.40695	0	8337	0.0111566	0.000725373
0.456434	0	8348	0.052688	0.000585724	-1900.82	-108.966						0.456434	0	8348	0.0429267	0.0469713	-172474	-91465		0.456434	0	8348	0.000824341	0.000192241	-93.6004	-668.946			0.456434	0	8348	0.00580629	-0.000616386	489.272	2116.29		0.456434	0	8348	0.00531054	-0.000645513	1633.6	622.626		0.456434	0	8348	0.019623	0.00316361
0.430481	0	8354	0.0837552	0.00100205	277.439	-617.295						0.430481	0	8354	0.0694674	-0.00370651	-52004.5	-28817.7		0.430481	0	8354	0.000308286	-6.181e-05	-128.175	-261.5			0.430481	0	8354	0.00273175	-5.59741e-05	531.294	324.342		0.430481	0	8354	0.00576973	0.000341211	1079.92	-2780.36		0.430481	0	8354	0.0071175	-4.60214e-05
0.398206	0	8363	0.0811479	0.000739976	-3310.7	4965.41						0.398206	0	8363	0.440717	0.735402	-47230.4	-9241.04		0.398206	0	8363	0.000522326	9.40178e-05	-262.03	-219.166			0.398206	0	8363	0.00373858	0.000222205	-506.983	-333.846		0.398206	0	8363	0.0112369	-0.000655923	627.017	-242.488		0.398206	0	8363	0.00285107	0.000101694
0.344392	0	8387	0.0617337	-0.00418878	-2672.86	-3707.94						0.344392	0	8387	0.0873242	-0.00186437	-71721.1	-33522.9		0.344392	0	8387	0.000793858	-2.96849e-05	233.049	-95.6944			0.344392	0	8387	0.00209752	6.80193e-06	74.0409	-347.395		0.344392	0	8387	0.00811744	-0.000864614	236.79	-186.639		0.344392	0	8387	0.0112257	-0.00133347
0.342145	0	8389	0.125825	-0.00219409	-3197.04	-4353.52						0.342145	0	8389	2.22379	-1.46732	-1427.5	-15544.4		0.342145	0	8389	0.00209424	6.84282e-05	-77.8893	-380.663			0.342145	0	8389	0.00192009	0.00101405	1072.29	200.574		0.342145	0	8389	0.0198613	-0.0011815	-410.133	-1139.58		0.342145	0	8389	0.0149224	-0.000696203
0.480121	0	8395	0.0418381	-0.000707787	988.203	-210.719						0.480121	0	8395	0.101213	0.0130435	6637	52717.1		0.480121	0	8395	0.000850297	1.00312e-05	315.065	53.4218			0.480121	0	8395	0.00550623	-0.000330357	356.454	238.112		0.480121	0	8395	0.0148442	0.000265211	1848.58	-224.007		0.480121	0	8395	0.0106261	-0.0010177
0.314106	0	8397	0.0094149	0.000191467	206.742	3145.69						0.314106	0	8397	0.0427489	0.00698426	-4465.47	87.2674		0.314106	0	8397	0.000773557	6.68391e-05	-9.23067	-10.9665			0.314106	0	8397	0.00047427	7.60508e-05	216.768	-0.483904		0.314106	0	8397	0.0074434	3.3699e-05	392.878	222.233		0.314106	0	8397	0.0031552	9.13073e-05
0.383861	0	8398	0.0192688	0.000481748	96.7527	6587.29						0.383861	0	8398	0.039927	-0.0109943	13548.4	-32724.3		0.383861	0	8398	0.000848256	-4.94204e-07	87.5661	-28.8428			0.383861	0	8398	0.00136011	0.00011148	310.276	-358.177		0.383861	0	8398	0.0057661	-0.000134149	1026.33	63.0884		0.383861	0	8398	0.00594903	-0.000339046
0.442244	0	8401	0.013411	-0.000525414	-4881.4	2114.68						0.442244	0	8401	2.94707	-0.817638	98830.7	1587.2		0.442244	0	8401	0.00182745	-0.000546528	381.122	559.337			0.442244	0	8401	0.0142713	-0.00252518	4636.41	-4573.07		0.442244	0	8401	0.0413666	-0.00506057	15755	-19611.3		0.442244	0	8401	0.0278386	-0.00471612
0.455039	0	8402	0.0443626	0.000849055	791.307	8321.23						0.455039	0	8402	0.020133	0.00241889	50064.3	11955.9		0.455039	0	8402	0.000139745	9.84827e-07	32.2135	41.8526			0.455039	0	8402	0.00365748	-0.000168676	198.798	-51.9311		0.455039	0	8402	0.00397417	0.000159233	543.288	-759.236		0.455039	0	8402	0.0131492	-0.000355095
0.40903	0	8429	0.0077809	0.000585806	1510.23	-901.669						0.40903	0	8429	4.94777	-0.0278961	-169756	-481826		0.40903	0	8429	0.000591669	0.000239995	77.2167	20.5521			0.40903	0	8429	0.0123255	-0.00137035	6232.27	-3129.71		0.40903	0	8429	0.00999426	-0.0169589	-1076.65	30880.2		0.40903	0	8429	0.00844597	-0.00661426
0.370843	0	8438	0.0408083	0.0012808	358.928	-439.64						0.370843	0	8438	0.0101475	-0.0377334	28062.8	484.781		0.370843	0	8438	0.00136258	-0.00604022	127.168	424.637			0.370843	0	8438	0.000390547	-2.18258e-05	-216.98	361.848		0.370843	0	8438	0.00659272	0.000556555	1683.66	-1566.63		0.370843	0	8438	0.00888425	-0.00195977
0.453099	0	8444	0.0555764	-0.00192468	8.83947	-62.7942						0.453099	0	8444	0.0879445	0.0065296	-19369.7	70950.9		0.453099	0	8444	0.00129739	0.000122181	288.963	-6.59334			0.453099	0	8444	0.0063487	-0.000278567	690.083	390.838		0.453099	0	8444	0.0156766	-0.000274783	3384.83	-2572.4		0.453099	0	8444	0.0113702	0.00022996
0.482865	0	8452	0.0640994	0.00131003	1791.58	-879.602						0.482865	0	8452	0.0490353	0.000342816	81496.8	-56479.3		0.482865	0	8452	0.00180832	-9.46133e-05	-41.653	163.341			0.482865	0	8452	0.00563733	0.000171008	903.974	356.999		0.482865	0	8452	0.0120143	-0.000810697	154.912	-2249.27		0.482865	0	8452	0.0161292	-3.81667e-05
0.465359	0	8459	0.0219299	0.000972226	-2503	1315.42						0.465359	0	8459	0.0102839	0.00487392	3310.1	-9109.71		0.465359	0	8459	0.000771247	-7.3253e-05	99.237	148.79			0.465359	0	8459	0.00270332	1.3972e-05	185.769	-381.765		0.465359	0	8459	0.00387053	0.000132761	319.249	687.466		0.465359	0	8459	0.00316347	-0.000161743
0.494437	0	8468	0.00245149	-5.9341e-05	-109.716	37.3454						0.494437	0	8468	0.00673506	0.00102278	-21664.8	-8430.21		0.494437	0	8468	0.000112675	-4.42984e-05	28.3021	-20.5515			0.494437	0	8468	0.000135178	0.000101181	-19.7006	-31.6893		0.494437	0	8468	0.000333651	-0.000248042	-7.50893	-196.58		0.494437	0	8468	0.000956398	-0.000704349
0.48622	0	8469	0.0768804	-0.0012332	1499.47	3150.7						0.48622	0	8469	0.0488323	-0.065193	51395.9	-6869.41		0.48622	0	8469	0.000768029	1.64837e-05	-317.23	-236.216			0.48622	0	8469	0.00269824	0.000186356	-402.089	-494.712		0.48622	0	8469	0.00739806	-0.000904913	-120.402	-211.697		0.48622	0	8469	0.000194871	-0.000120759
0.446421	0	8470	0.0485125	0.0217136	1239.37	-567.084						0.446421	0	8470	0.123767	0.032058	16505.2	-29491.5		0.446421	0	8470	0.000340347	-3.06882e-06	259.524	-153.767			0.446421	0	8470	0.00117001	-0.000176406	-287.403	-36.894		0.446421	0	8470	0.00476431	-0.000911052	-1066.68	-231.773		0.446421	0	8470	0.00581712	-3.31788e-05
0.493708	0	8476	0.0947451	-0.0044944	1428.47	-11300.8						0.493708	0	8476	0.0632812	-0.0382164	84377.4	103653		0.493708	0	8476	0.00118336	-8.19723e-05	246.14	-302.54			0.493708	0	8476	0.00398433	-0.00197405	178.368	-1535.61		0.493708	0	8476	0.00804159	0.000397126	-3867.68	1729.7		0.493708	0	8476	0.00918058	0.0135451
0.397601	0	8511	0.0515617	0.00455551	-395.138	-7740.07						0.397601	0	8511	0.305417	0.445083	583281	-268106		0.397601	0	8511	0.0032957	-0.000241637	-347.927	-226.997			0.397601	0	8511	0.000763951	-0.000480298	283.9	171.008		0.397601	0	8511	0.0103922	0.00183233	-2493.7	-517.966		0.397601	0	8511	0.0175172	-0.00188608
0.399449	0	8517	0.00866291	0.00241525	-2775.54	6032.24						0.399449	0	8517	0.0260775	-0.00285891	-7698.86	-2477.19		0.399449	0	8517	0.000305763	5.52313e-06	-9.07831	-118.399			0.399449	0	8517	0.00148883	0.000389919	72.0523	-431.265		0.399449	0	8517	0.00493826	-0.000171426	-816.297	-203.299		0.399449	0	8517	0.00464569	-0.000405332
0.357034	0	8539	0.0145175	0.00101177	88.2419	-1583.72						0.357034	0	8539	3.58883	-0.476222	0	-7267.89		0.357034	0	8539	0.00323565	0.000119748	-165.961	76.403			0.357034	0	8539	0.00852127	-0.000582254	-398.895	836.777		0.357034	0	8539	0.0223414	-0.00153394	3324.82	-4132.48		0.357034	0	8539	0.00528119	-0.0107537
0.374878	0	8540	0.110835	0.00361951	-172.474	-7559.76						0.374878	0	8540	0.274143	1.6631	471511	-104736		0.374878	0	8540	0.000766733	-0.000240716	-88.5648	-275.316			0.374878	0	8540	0.00193471	-0.000758095	499.55	1053.41		0.374878	0	8540	0.00703875	-0.00139689	2357.61	-1002.82		0.374878	0	8540	0.0238586	0.00241124
0.303609	0	8547	0.0175007	0.000454217	-396.419	-730.118						0.303609	0	8547	0.0132457	0.00132834	670.176	-1356.15		0.303609	0	8547	0.000430956	-5.48199e-05	-0.936447	-30.6278			0.303609	0	8547	0.0031174	-3.66049e-05	13.3795	108.72		0.303609	0	8547	0.00516643	0.000418451	23.6481	78.5134		0.303609	0	8547	0.000156212	-0.000229621
0.492157	0	8549	0.00620058	-0.00387052	457.94	-313.612						0.492157	0	8549	0.014197	0.0117083	-7406.58	-12539.6		0.492157	0	8549	0.000164547	0.000105651	14.2692	20.7576			0.492157	0	8549	0.000277766	4.34218e-05	-45.9241	95.5407		0.492157	0	8549	0.00118652	-0.000344829	220.123	-123.296		0.492157	0	8549	0.000282667	0.000328152
0.349867	0	8570	0.0311922	0.00302902	-373.812	-3144.07						0.349867	0	8570	0.0480687	-0.0177325	-20797.6	-10384.9		0.349867	0	8570	0.000667762	0.000350911	261.448	-384.7			0.349867	0	8570	0.00235788	0.00310291	-539.174	-368.37		0.349867	0	8570	0.00207215	0.0018945	736.017	-481.297		0.349867	0	8570	0.00723875	-0.00165457
0.489345	0	8571	0.0291471	-0.00778153	-1937.43	-5825.72						0.489345	0	8571	0.267411	-0.137496	36855.9	19806.6		0.489345	0	8571	0.000893856	0.000156897	188.133	-497.163			0.489345	0	8571	0.00411412	5.98904e-05	-715.964	19.8189		0.489345	0	8571	0.0134395	-7.09062e-06	-3317.22	973.349		0.489345	0	8571	0.0173789	-0.003243
0.466803	0	8576	0.0161024	0.000983212	-1140.2	6472.32						0.466803	0	8576	0.0172244	0.0134909	15624	-24205.2		0.466803	0	8576	0.000999263	0.000430094	268.828	-143.077			0.466803	0	8576	0.00107593	0.000122448	-243.67	-210.464		0.466803	0	8576	0.00384832	0.000492625	986.161	627.294		0.466803	0	8576	0.00395721	0.00040577
0.404418	0	8577	0.0168317	2.43474e-05	-556.955	6799.38						0.404418	0	8577	0.121618	0.275919	-113551	45475.5		0.404418	0	8577	0.00196203	-2.54956e-06	68.7531	-7.5875			0.404418	0	8577	0.00215839	-0.000113052	35.2267	-18.2387		0.404418	0	8577	0.00864086	-0.000270411	1520.82	478.826		0.404418	0	8577	0.00907032	-0.00122121
0.430967	0	8587	0.0536918	0.000985818	1723.79	-1149.33						0.430967	0	8587	0.0832952	0.204996	1504.96	-91248.5		0.430967	0	8587	0.00209516	-1.76991e-05	16.2036	64.1618			0.430967	0	8587	0.00238751	0.000584242	-24.6733	-545.383		0.430967	0	8587	0.010019	-0.000666615	1594.53	69.7284		0.430967	0	8587	0.00638996	-0.000675089
0.304579	0	8589	0.0191171	-0.00217212	41.9499	784.229						0.304579	0	8589	0.028211	-0.0250658	3846.37	186.172		0.304579	0	8589	0.000571547	1.26886e-05	19.1032	2.00369			0.304579	0	8589	0.00127196	-0.000415076	50.6653	108.809		0.304579	0	8589	0.00250749	-5.3072e-05	179.634	-188.307		0.304579	0	8589	0.0040981	-0.00046475
0.484197	0	8590	0.0791555	-0.0038295	442.272	-1616.49						0.484197	0	8590	0.147212	0.141668	-86768.1	-167749		0.484197	0	8590	0.000430185	-0.000128351	-430.663	233.04			0.484197	0	8590	0.00260051	-0.000352289	-992.955	1251.36		0.484197	0	8590	0.0187913	1.52671e-05	-1841.85	1754.51		0.484197	0	8590	0.0162023	0.00236786
0.331737	0	8600	0.0301336	0.00230727	-595.013	1957.42						0.331737	0	8600	0.00618354	-0.00159771	8473.11	-3010.43		0.331737	0	8600	0.00125307	7.68374e-05	21.1076	45.2748			0.331737	0	8600	0.00283515	-0.000310222	-41.7765	-319.228		0.331737	0	8600	0.00869021	-0.000463937	-1204.39	-252.244		0.331737	0	8600	0.00585393	0.000637908
0.354347	0	8603	0.0310414	-0.000195285	695.773	-222.371						0.354347	0	8603	0.0160863	0.000341768	1102.88	-267.419		0.354347	0	8603	0.000709648	-4.34572e-05	-58.1934	-181.799			0.354347	0	8603	0.00337323	0.000145338	-252.658	-404.443		0.354347	0	8603	0.00908032	0.00031686	-125.581	346.757		0.354347	0	8603	0.00280101	9.14863e-05
0.350008	0	8604	0.0490041	0.00102378	259.742	170.775						0.350008	0	8604	0.0648214	-0.00262933	36614.9	-36209.5		0.350008	0	8604	0.00101444	0.000196923	16.3063	-151.82			0.350008	0	8604	0.00467762	9.00376e-05	37.2569	-89.3582		0.350008	0	8604	0.00817047	0.000433658	-876.3	-1939.01		0.350008	0	8604	0.00963416	0.000167716
0.491145	0	8614	0.0153917	0.000913621	1694.68	-485.595						0.491145	0	8614	0.0800358	-0.0266553	-24970.7	-21340.5		0.491145	0	8614	0.000455641	-3.32153e-05	-170.557	41.703			0.491145	0	8614	0.000520847	-2.25751e-05	95.3788	-48.5404		0.491145	0	8614	0.002034	-0.000482993	677.711	691.981		0.491145	0	8614	0.0132586	-0.0088267
0.32596	0	8617	0.0391757	-0.00179839	25.048	2922.72						0.32596	0	8617	0.0119952	0.0582089	-4318.43	23736.5		0.32596	0	8617	0.000935984	7.42944e-05	50.2366	-29.9378			0.32596	0	8617	0.00527418	-0.000100796	108.368	169.81		0.32596	0	8617	0.00131944	-0.000528809	310.318	4.91366		0.32596	0	8617	0.00410332	0.0002281
0.4823	0	8631	0.0330465	0.00114636	-1921.08	10484.2						0.4823	0	8631	2.26039	0.863513	-5777.31	141878		0.4823	0	8631	0.000521946	-6.24529e-05	12.3366	39.3061			0.4823	0	8631	0.00409963	-0.000103513	573.534	-533.563		0.4823	0	8631	0.00490788	5.1566e-05	1377.97	-114.738		0.4823	0	8631	0.0122574	-0.000528212
0.496243	0	8634	0.063493	0.00171557	-641.775	-2841.81						0.496243	0	8634	0.0172387	-0.0121003	-6602.37	67957.2		0.496243	0	8634	0.000361968	-2.88099e-05	-133.426	-534.769			0.496243	0	8634	0.0021073	-3.41191e-05	605.48	858.352		0.496243	0	8634	0.00575049	-0.000101673	523.627	-2083.39		0.496243	0	8634	0.0049279	-0.000368133
0.406448	0	8637	0.0153612	-0.00292527	2466.3	2556.21						0.406448	0	8637	0.0673525	-0.0197179	26922.7	-9935.09		0.406448	0	8637	0.000333537	-2.61954e-05	10.9384	19.5797			0.406448	0	8637	0.00138395	-0.000284562	46.9152	21.6374		0.406448	0	8637	0.00374252	0.000673172	41.8729	-543.258		0.406448	0	8637	0.00390322	-0.00105611
0.421171	0	8638	0.0731816	-0.000278605	-1556.22	869.203						0.421171	0	8638	0.533304	-1.06383	-247766	117653		0.421171	0	8638	0.00112879	-0.000164939	-323.984	497.569			0.421171	0	8638	0.00754514	0.000364077	527.599	-1173.06		0.421171	0	8638	0.0126693	-0.000614621	1150.9	1423.69		0.421171	0	8638	0.0122489	-0.00383698
0.303122	0	8643	0.0439478	0.00129106	-34.7854	3766.86						0.303122	0	8643	0.0537439	-0.101939	-29151.7	6010.19		0.303122	0	8643	0.000227451	-3.70584e-05	1.79643	18.5387			0.303122	0	8643	0.00395806	-0.000223866	171.68	-73.1496		0.303122	0	8643	0.00352175	0.000136532	318.397	-138.374		0.303122	0	8643	0.0135456	-0.000272211
0.396105	0	8644	0.0942883	2.71867e-05	-728.455	2523.78						0.396105	0	8644	1.39363	-3.32309	-6180.67	-70291.3		0.396105	0	8644	0.00163383	0.000180643	-51.5163	-101.594			0.396105	0	8644	0.0049668	-0.00113249	350.783	924.631		0.396105	0	8644	0.00976412	0.00124028	-1432.76	-2237.01		0.396105	0	8644	0.0129838	-0.000369609
0.366184	0	8645	0.0728341	0.00237798	594.244	-2660.59						0.366184	0	8645	0.106328	-0.142996	-94803.1	-71551.5		0.366184	0	8645	0.00163611	8.28099e-05	22.7282	-272.025			0.366184	0	8645	0.00483866	0.000185911	-47.7731	-110.474		0.366184	0	8645	0.0153913	0.000524607	238.366	-197.063		0.366184	0	8645	0.00698825	-0.000703503
0.439388	0	8654	0.012685	0.000622487	-519.236	-2809.58						0.439388	0	8654	3.86092	-0.347716	0	-11007.5		0.439388	0	8654	0.00197796	0.00103282	25.4016	-1834.79			0.439388	0	8654	0.0186235	-0.0765267	49453.1	6812.41		0.439388	0	8654	0.988512	0.372079	-61576.7	315271		0.439388	0	8654	0.651893	-1.05298
0.348321	0	8657	0.0263634	0.00254129	-407.038	308.514						0.348321	0	8657	1.96874	-2.22013	-177608	23732.8		0.348321	0	8657	2.76156	-6.30011	0.224373	-6917.46			0.348321	0	8657	6.67359	-4.42298	0	-6917.51		0.348321	0	8657	5.53648	-1.50878	0	-6917.51		0.348321	0	8657	2.82192	-2.67903
0.483808	0	8681	0.00732121	-0.0017825	2364.72	7478.37						0.483808	0	8681	1.57367	0.86211	21109.6	-283329		0.483808	0	8681	0.00103531	0.000368774	-665.594	22.2171			0.483808	0	8681	0.00616535	0.00209257	-3322.53	-1908.77		0.483808	0	8681	0.00850666	0.00147424	288.667	-6442.53		0.483808	0	8681	0.0383415	-0.00584649
0.412097	0	8689	0.0728552	0.000467067	-72.9673	405.818						0.412097	0	8689	0.286504	-3.72542	-62984.8	155753		0.412097	0	8689	0.00323886	-0.000178929	-75.0185	58.5427			0.412097	0	8689	0.00447113	0.00038371	-667.785	395.382		0.412097	0	8689	0.0117619	-0.00109234	2737.14	2983.6		0.412097	0	8689	0.00525783	-0.000877895
0.350114	0	8691	0.0455381	-0.00156723	887.602	-491.25						0.350114	0	8691	0.0575055	-0.143344	-70145	-44489		0.350114	0	8691	0.00122374	-0.00795862	1195.11	-468.552			0.350114	0	8691	0.0044584	-0.00139764	297.295	-410.095		0.350114	0	8691	0.00800486	-0.00762555	-714.616	1223.96		0.350114	0	8691	0.00693413	0.0029363
0.434983	0	8697	0.0167749	0.0119444	824.372	-11175.1						0.434983	0	8697	3.38285	-1.34882	-26458.7	6748.45		0.434983	0	8697	0.00168065	0.000101955	-98.5048	-25.7783			0.434983	0	8697	0.00161713	9.78773e-05	301.574	457.582		0.434983	0	8697	0.00591597	0.000861458	208.189	156.81		0.434983	0	8697	0.00587022	0.0060875
0.456891	0	8701	0.00829791	0.000285981	-950.264	964.452						0.456891	0	8701	0.0103847	0.00126766	579.398	-81.3729		0.456891	0	8701	0.00119699	-3.19919e-06	83.1523	213.338			0.456891	0	8701	0.00133163	0.000129982	-438.392	-345.152		0.456891	0	8701	0.00314445	-0.000278488	-1031.42	90.7816		0.456891	0	8701	0.00231515	0.000335712
0.492358	0	8702	0.0274551	-0.000612214	100.11	99.4069						0.492358	0	8702	0.0348496	0.00339515	-15010	15856		0.492358	0	8702	0.000258708	0.000141933	-174.742	-37.9143			0.492358	0	8702	0.00390321	0.000275183	-104.333	24.0928		0.492358	0	8702	0.00829656	0.000284093	-371.561	-1760.21		0.492358	0	8702	0.0114024	0.000488458
0.356567	0	8704	0.0389123	0.00369643	714.2	-290.491						0.356567	0	8704	0.0180107	0.0157551	-18563.7	48956.5		0.356567	0	8704	0.000576209	-0.00012985	-47.5241	-263.027			0.356567	0	8704	0.00138085	0.000231671	35.4498	144.783		0.356567	0	8704	0.00702307	-0.00104282	2336.57	-192.797		0.356567	0	8704	0.00384783	0.000212543
0.316896	0	8711	0.0246577	-0.000478268	799.885	244.817						0.316896	0	8711	0.732308	3.31582	0	-5725.65		0.316896	0	8711	0.00149076	7.48376e-05	55.504	-46.2			0.316896	0	8711	0.0100123	0.000304818	-367.535	-198.025		0.316896	0	8711	0.0104651	0.0018735	4260.42	-681.185		0.316896	0	8711	0.0301227	0.00500294
0.321072	0	8718	0.0228342	-0.000814602	48.2581	496.272						0.321072	0	8718	1.64065	3.32651	-29732.6	-68790		0.321072	0	8718	0.147831	-0.0716104	13987.9	-188156			0.321072	0	8718	1.16836	-0.912977	-30315.2	168724		0.321072	0	8718	1.90545	-0.924732	0	-5877.53		0.321072	0	8718	2.48165	2.57196
0.4738	0	8720	0.100254	-0.000674546	-1729.21	-3280.8						0.4738	0	8720	0.308402	-0.521248	23039.7	-18146.8		0.4738	0	8720	0.00259001	-0.000327651	226.985	376.88			0.4738	0	8720	0.00903881	0.000247506	-419.99	1268.84		0.4738	0	8720	0.00409223	0.00265101	2293.08	-4331.67		0.4738	0	8720	0.0065162	0.00525269
0.439221	0	8722	0.0574639	0.00198359	-536.856	7867.08						0.439221	0	8722	0.0423311	-0.0634541	-104591	-42984.9		0.439221	0	8722	0.00107107	9.81075e-05	-28.0466	-181.402			0.439221	0	8722	0.00655543	-6.97109e-05	-440.414	268.295		0.439221	0	8722	0.00260746	-0.000508979	-1650.01	-612.023		0.439221	0	8722	0.0109623	0.000755199
0.403512	0	8728	0.0286253	-0.00207835	239.939	6661.34						0.403512	0	8728	0.020892	-0.0753979	14441	-128427		0.403512	0	8728	0.000968298	-1.70259e-07	1.05635	11.8628			0.403512	0	8728	0.00241923	0.000264384	535.727	309.281		0.403512	0	8728	0.0102856	-4.77955e-06	386.988	-79.4196		0.403512	0	8728	0.00123507	-0.000295926
0.372975	0	8731	0.055757	0.0036012	905.438	-36.2665						0.372975	0	8731	0.0245625	-0.111615	87246.3	40683.6		0.372975	0	8731	0.00189651	2.32634e-05	-6.06057	-7.73573			0.372975	0	8731	0.00500732	-6.5847e-05	402.236	78.2723		0.372975	0	8731	0.00908835	0.000416897	-521.299	70.6017		0.372975	0	8731	0.0149697	0.000568414
0.321148	0	8737	0.0804994	-0.000569463	-202.405	1301.14						0.321148	0	8737	0.0318725	-0.172113	-17579.3	31195.1		0.321148	0	8737	0.000892265	4.12828e-05	-158.919	-153.169			0.321148	0	8737	0.00255838	0.000130096	-197.349	-97.1517		0.321148	0	8737	0.00925212	-0.000672373	-185.973	-172.358		0.321148	0	8737	0.00101518	1.75653e-05
0.466615	0	8777	0.0317439	0.000212432	3451.17	1430.49						0.466615	0	8777	0.00809975	-0.03752	-20943.4	-32483.3		0.466615	0	8777	0.000393513	7.88225e-05	-145.367	-36.2229			0.466615	0	8777	0.000569876	0.000425624	256.565	4.54299		0.466615	0	8777	0.000237393	-0.0012001	-113.781	-242.983		0.466615	0	8777	0.00415754	0.00761332
0.406005	0	8789	0.00207608	0.00058493	63.138	-84.7376						0.406005	0	8789	0.00124231	0.000654472	4666	1891.47		0.406005	0	8789	2.18187e-05	3.44759e-06	7.88141	2.31857			0.406005	0	8789	0.000305055	-0.000234385	-41.5957	2.83576		0.406005	0	8789	0.000389844	0.00029084	215.79	-4.80343		0.406005	0	8789	0.000208496	0.000145255
0.329266	0	8794	0.00362038	-6.11661e-05	-233.137	1309.28						0.329266	0	8794	0.0654634	-0.0184287	-753.125	9119.86		0.329266	0	8794	0.000351441	5.17137e-05	-16.2219	1.37716			0.329266	0	8794	0.000231792	-2.63485e-05	96.7059	48.008		0.329266	0	8794	0.00415165	0.000279532	61.1611	-34.1517		0.329266	0	8794	0.00199098	-0.000120429
0.411549	0	8796	0.0749891	0.000396551	-716.142	-908.253						0.411549	0	8796	0.0809003	0.0522447	110124	22501.3		0.411549	0	8796	0.00132945	-3.57131e-05	29.7205	354.706			0.411549	0	8796	0.000671638	-0.000223747	412.578	180.388		0.411549	0	8796	0.0117999	-0.0044683	-1361.66	2475.87		0.411549	0	8796	0.00170534	0.000928068
0.358761	0	8799	0.0332017	-0.00154953	911.68	-796.446						0.358761	0	8799	0.0323542	-0.0129782	11145.5	25541.3		0.358761	0	8799	0.00109394	0.000103637	-34.2724	12.5374			0.358761	0	8799	0.00187505	0.00037695	334.064	-283.981		0.358761	0	8799	0.00795148	-0.000582677	568.3	608.558		0.358761	0	8799	0.00411453	-0.000331388
0.462022	0	8800	0.0235156	0.000606011	-178.282	303.881						0.462022	0	8800	0.0665066	-0.0087204	82477.7	-47120.5		0.462022	0	8800	0.000466425	-1.66965e-05	-69.3318	187.104			0.462022	0	8800	0.00064876	5.4605e-06	365.086	-699.817		0.462022	0	8800	0.00624097	0.000408926	-857.42	1256.73		0.462022	0	8800	0.00219332	0.000621367
0.384037	0	8805	0.0701197	-0.00245177	2500.33	5090						0.384037	0	8805	2.00461	-0.236002	0	-8408.83		0.384037	0	8805	0.00150031	-0.000278667	282.467	-156.801			0.384037	0	8805	0.00680797	0.00160701	-1126.92	1316.27		0.384037	0	8805	0.0154245	-0.000844353	2924.65	-1506.42		0.384037	0	8805	0.019642	-0.00956357
0.484307	0	8815	0.0351953	0.00124949	146.994	10531.1						0.484307	0	8815	0.0427505	0.0326142	165870	69172.6		0.484307	0	8815	0.000363026	-1.29129e-05	85.5502	22.8146			0.484307	0	8815	0.00336876	-0.000207013	799.998	-379.489		0.484307	0	8815	0.00320294	0.00032593	339.798	-630.607		0.484307	0	8815	0.0117654	-0.000437454
0.488802	0	8819	0.085903	0.00141278	-992.128	999.871						0.488802	0	8819	1.21344	0.0201958	59787.6	54095.9		0.488802	0	8819	0.00426743	-0.000145262	-240.988	185.42			0.488802	0	8819	0.00412506	0.000737895	-1079.75	53.9262		0.488802	0	8819	0.0145922	0.000322379	-1466.51	568.775		0.488802	0	8819	0.00438669	-0.000450452
0.319993	0	8834	0.0296241	0.00263229	0.379753	-6111.15						0.319993	0	8834	0.126734	-1.52492	3967.32	-118318		0.319993	0	8834	0.00117419	3.361e-05	179.33	1.51519			0.319993	0	8834	0.00192635	0.000191205	182.164	-127.266		0.319993	0	8834	0.010768	0.00135401	362.089	-278.225		0.319993	0	8834	0.0045118	0.00061968
0.421675	0	8846	0.0726612	-0.000406242	-308.293	1338.5						0.421675	0	8846	0.268048	-0.434829	-125334	-188928		0.421675	0	8846	0.000609833	4.57832e-05	-112.442	212.156			0.421675	0	8846	0.00349614	0.000119121	127.291	-472.52		0.421675	0	8846	0.0163449	0.000655457	2295.19	2359.89		0.421675	0	8846	0.0122454	-0.00032372
0.365432	0	8849	0.0167656	-0.0457608	38.7585	-95.6444						0.365432	0	8849	4.05429	0.375682	0	-7613.85		0.365432	0	8849	0.0139583	0.12846	3422.61	-21132.5			0.365432	0	8849	0.0155994	-0.033767	-932.131	-1183.57		0.365432	0	8849	3.87995	4.63932	0	-7613.85		0.365432	0	8849	2.21851	1.03125
0.479747	0	8861	0.0263262	0.0042168	-2786.11	-6821.42						0.479747	0	8861	2.20743	-0.605215	452830	219186		0.479747	0	8861	0.00372526	-0.000503808	-480.317	967.329			0.479747	0	8861	0.00656511	0.00231654	408.789	-3112.3		0.479747	0	8861	0.28198	-0.577515	-45365.1	71553.3		0.479747	0	8861	0.685832	-0.0466095
0.391399	0	8862	0.0229872	0.000555095	-1193.08	-589.24						0.391399	0	8862	2.91844	1.89049	-220618	-221791		0.391399	0	8862	0.00278148	0.000152163	-226.562	213.904			0.391399	0	8862	0.020272	-0.0107005	19622.1	-3643.09		0.391399	0	8862	0.0440771	-0.00112017	24346.7	29446.7		0.391399	0	8862	0.0439238	-0.146692
[truncated: 48,810 more rows]
[truncated: 86 more columns]

## Sheet: Sheet2
5									35								65							75
[truncated: 50,003 more rows]
