# Supplementary material for: Dynamic fragmentation and entrainment characteristics of a heavily Jointed Landslide: DEM simulation, field seismic signal and UAV image analysis
Source: Research Square preprint supplement (doi:10.21203/rs.3.rs-7446987/v1), 2025-10-11
Supplement: Supplementary file 1 [file 5948acb77e91038a4735f20e.docx]

**Table 1. Mechanical strength parameters of rock based on scale-effect calibration function.**

| Mechanical Parameters | Laboratory Test | Scale-Effect Calibration Function | Numerical Test |
| --- | --- | --- | --- |
| *E*(Gpa) | 26.16 |  | 21.97 |
| *UCS*(Mpa) | 64.27 |  | 52.06 |
| *ν* | 0.23 |  | 0.20 |

**Table 2. Micro-mechanical parameters used for rocks in the Xinmo landslide.**

| DEM Parameters | Value | DEM Parameters | Value |
| --- | --- | --- | --- |
| Ball radius (m) | 0.30-0.60 | Bond effective modulus (Gpa) | 1.22 |
| Density (kg/m3) | 1850-2650 | Bond stiffness ratio | 1.00 |
| Contact effective modulus (Gpa ) | 1.22 | pb_ten/(Mpa ) | 1.20 |
| Contact stiffness ratio | 1.00 | pb_coh/(Mpa) | 10.00 |
| Sliding friction | 0.30 | pb_fa(°) | 40.00 |
| Ball-balll Rolling friction | 0.10 | Ball-wall Rolling friction | 0.20 |
| adh d0(m) | 0-0.40 | adh force (N) | 0-1.30 |

**Table 3. UAV route planning parameters used in the flight to survey the Xinmo landslide.**

| Resolution  (cm/pixel) | Course  overlap | Side  overlap | Height  (m) | Average altitude (m) | Voyage  (km) | Flight time  (minute) | Area  (km2) |
| --- | --- | --- | --- | --- | --- | --- | --- |
| 14.9 | 80% | 60% | 633 | 2985 | 39.6 | 70 | 5.237 |
